# Supplementary material
Source: PubMed Central journal article supplement (PMC2615677)

# ***De Novo* Asymmetric Synthesis of Milbemycin $\beta_3$ via an Iterative Asymmetric Hydration Approach**

Miaosheng Li and George A. O'Doherty\*

Department of Chemistry, West Virginia University  
Morgantown, WV 26506

## **Supporting Information:**

### **Table of Contents**

#### Page

|      |                                                                                                                                                         |
|------|---------------------------------------------------------------------------------------------------------------------------------------------------------|
| S 6  | General Methods and Materials                                                                                                                           |
| S 6  | Experimental Procedure for 6-(4-Methoxy-phenoxy)-hex-1-yne ( <b>A</b> )                                                                                 |
| S 7  | Experimental Procedure for Ethyl 7-(4-methoxy-phenoxy)-hept-2-ynoate ( <b>12</b> )                                                                      |
| S 8  | Experimental Procedure for Ethyl 7-(4-methoxy-phenoxy)-hept-2,4-dienoate ( <b>10</b> )                                                                  |
| S 8  | Experimental Procedure for Ethyl (4 <i>R</i> ,5 <i>R</i> )-7-(4-methoxy-phenoxy)-4,5-dihydroxy-hept-2-enoate ( <b>B</b> )                               |
| S 9  | Experimental Procedure for Ethyl (4 <i>R</i> ,5 <i>R</i> )-3-{[5-(4-methoxy-phenoxy)-ethyl]-2-oxo-[1,3]dioxolan-4-yl} acrylate ( <b>13</b> )            |
| S 10 | Experimental Procedure for Ethyl (5 <i>S</i> )-7-(4-methoxy-phenoxy)-5-hydroxy-2-heptenoate ( <b>14</b> )                                               |
| S 11 | Experimental Procedure for Ethyl 2-[(2 <i>R</i> ,4 <i>R</i> ,6 <i>R</i> )-6-[(4-methoxy-phenoxy)-ethyl]-2-phenyl-1,3-dioxan-4-yl] acetate ( <b>15</b> ) |
| S 12 | Experimental Procedure for <i>N</i> -Methoxy- <i>N</i> -methyl- 2-[(2 <i>R</i> ,4 <i>R</i> ,6 <i>R</i> )-6-                                             |

- [(4-methoxy-phenoxy)-ethyl]-2-phenyl-1,3-dioxan-4-yl}acetamide (**16**)
- S 13 Experimental Procedure for Dimethyl 3-[(2*R*,4*R*,6*R*)-6-[(4-methoxy-phenoxy)-ethyl]-2-phenyl-1,3-dioxan-4-yl]-2-oxopropyl phosphonate (**8**)
- S 14 Experimental Procedure for (3*E*,5*Z*)-1-[(2*R*,4*R*,6*R*)-6-[2-(4-Methoxy-phenoxy)-ethyl]-2-phenyl-1,3-dioxan-4-yl]-5-methylhepta-3,5-dien-2-one (**7**)
- S 15 Experimental Procedure for (*E*,5*S*,6*R*)-1-[(2*R*,4*R*,6*R*)-6-[2-(4-Methoxy-phenoxy)-ethyl]-2-phenyl-1,3-dioxan-4-yl]-5,6-dihydroxy-5-methylhept-3-en-2-one (**17**).
- S 16 Experimental Procedure for (4*S*,5*R*)-4-[(*E*)-4-[(2*R*,4*R*,6*R*)-6-[2-(4-Methoxy-phenoxy)-ethyl]-2-phenyl-1,3-dioxan-4-yl]-3-oxobut-1-enyl]-4,5-dimethyl-1,3-dioxolan-2-one (**C**)
- S 17 Experimental Procedure for (*E*,5*S*,6*R*)-1-[(2*R*,4*R*,6*R*)-6-[2-(4-Methoxy-phenoxy)-ethyl]-2-phenyl-1,3-dioxan-4-yl]-6-dihydroxy-5-methylhept-3-en-2-one (**6**)
- S 18 Experimental Procedure for (2*S*,4*R*,6*S*,8*R*,9*S*)-4-Hydroxy-8,9-dimethyl-2-[2-(4-methoxy-phenoxy)-ethyl]-1,7-dioxaspiro[5.5] undecane (**19**).
- S 18 Experimental Procedure for (2*S*,4*R*,6*S*,8*R*,9*S*)-4-[(*tert*-Butyldiphenylsilyl)-oxy]-8,9-dimethyl-2-[2-(4-methoxy-phenoxy)-ethyl]-1,7-dioxaspiro[5.5]undecane (**D**).
- S 19 Experimental Procedure for (2*S*,4*R*,6*S*,8*R*,9*S*)-4-[(*tert*-Butyldiphenylsilyl)-oxy]-8,9-dimethyl-2-(2-hydroxyethyl)-1,7-dioxaspiro[5.5]undecane (**E**)
- S 20 Experimental Procedure for 2-[(2*S*,4*R*,6*R*,8*R*,9*S*)-4-[(*tert*-Butyldiphenylsilyl)-oxy]-8,9-dimethyl-1,7-dioxaspiro[5.5]undecyl]-ethanal (**4**)
- S 21 Experimental Procedure for (2*R*)-1-[(2*R*,4*R*,6*S*,8*R*,9*S*)-4-[(*tert*-Butyldiphenylsilyl)-oxy]-8,9-dimethyl-1,7-dioxaspiro[5.5]undecyl]-

|         |                                                                                                                                                                                                                                                                                                                                  |
|---------|----------------------------------------------------------------------------------------------------------------------------------------------------------------------------------------------------------------------------------------------------------------------------------------------------------------------------------|
|         | 3-methylbut-3-en-2-ol ( <b>20</b> )                                                                                                                                                                                                                                                                                              |
| S 22    | Experimental Procedure for (2 <i>R</i> )-2-(Allyloxy)-1-[(2 <i>R</i> ,4 <i>R</i> ,6 <i>S</i> ,8 <i>R</i> ,9 <i>S</i> )-4-[( <i>tert</i> -butyldiphenylsilyl)-oxy]-8,9-dimethyl-1,7-dioxaspiro[5.5]undecyl]-3-methylbut-3-ene ( <b>21</b> )                                                                                       |
| S 23    | Experimental Procedure for (5 <i>R</i> )-1-[(2 <i>R</i> ,4 <i>R</i> ,6 <i>R</i> ,8 <i>R</i> ,9 <i>S</i> )-4-[( <i>tert</i> -Butyldiphenylsilyl)-oxy]-8,9-dimethyl-1,7-dioxaspiro[5.5]undecan-2-yl]-3,5-dimethyl-2( <i>E</i> )-hexen-6-al ( <b>2</b> )                                                                            |
| S 24    | Experimental Procedure for 1-Bromo-4-methoxy-3-methylbenzene ( <b>F</b> )                                                                                                                                                                                                                                                        |
| S 24    | Experimental Procedure for 4-Methoxy-3-methylbenzoic acid ( <b>G</b> )                                                                                                                                                                                                                                                           |
| S 25    | Experimental Procedure for 4,5-Dihydro-2-(4-methoxy-3-methylphenyl)-4,4-dimethyloxazole ( <b>H</b> )                                                                                                                                                                                                                             |
| S 26    | Experimental Procedure for 3-Ethenyl-5-methoxy-3,6-dimethyl-1(3 <i>H</i> )-isobenzofuranone ( <b>I</b> )                                                                                                                                                                                                                         |
| S 26    | Experimental Procedure for Methyl 2-[3-(diphenylphosphinyl)-1-propenyl]-4-methoxy-5-methyl( <i>E</i> )-benzoate ( <b>3</b> )                                                                                                                                                                                                     |
| S 27    | Experimental Procedure for Methyl 2-[(5 <i>R</i> )-9-[(2 <i>R</i> ,4 <i>R</i> ,6 <i>R</i> ,8 <i>R</i> , 9 <i>S</i> )-4-[( <i>tert</i> -butyldiphenylsilyl)-oxy]-8,9-dimethyl-1,7-dioxaspiro[5.5]undecan-2-yl]-1,5,7-trimethyl-1( <i>E</i> ),3( <i>E</i> ),7( <i>E</i> )-nonatrien-1-yl]-4-methoxy-5-methylbenzoate ( <b>23</b> ) |
| S 28    | Experimental Procedure for Methyl 2-[(5 <i>R</i> )-9-[(2 <i>R</i> ,4 <i>R</i> ,6 <i>R</i> ,8 <i>R</i> , 9 <i>S</i> )-4-hydroxy-8,9-dimethyl-1,7-dioxaspiro[5.5]undecan-2-yl]-1,5,7-trimethyl-1( <i>E</i> ),3( <i>E</i> ),7( <i>E</i> )-nonatrien-1-yl]-4-methoxy-5-methylbenzoate ( <b>K</b> )                                   |
| S 29    | Experimental Procedure for 2-[(5 <i>R</i> )-9-[(2 <i>R</i> ,4 <i>R</i> ,6 <i>R</i> ,8 <i>R</i> , 9 <i>S</i> )-4-Hydroxy-8,9-dimethyl-1,7-dioxaspiro[5.5]undecan-2-yl]-1,5,7-trimethyl-1( <i>E</i> ),3( <i>E</i> ),7( <i>E</i> )-nonatrien-1-yl]-4-methoxy-5-methylbenzoic acid ( <b>L</b> )                                      |
| S 30    | Experimental Procedure for 5- <i>O</i> -Methylmilbemycin $\beta_3$ ( <b>M</b> )                                                                                                                                                                                                                                                  |
| S 31    | Experimental Procedure for Milbemycin $\beta_3$ ( <b>1</b> )                                                                                                                                                                                                                                                                     |
| S 33-34 | $^1\text{H}$ and $^{13}\text{C}$ NMR spectra of <b>A</b>                                                                                                                                                                                                                                                                         |

|         |                                                                  |
|---------|------------------------------------------------------------------|
| S 35-36 | $^1\text{H}$ and $^{13}\text{C}$ NMR spectra of <b>12</b>        |
| S 37-38 | $^1\text{H}$ and $^{13}\text{C}$ NMR spectra of <b>10</b>        |
| S 39-40 | $^1\text{H}$ and $^{13}\text{C}$ NMR spectra of <b>B</b>         |
| S 41-42 | $^1\text{H}$ and $^{13}\text{C}$ NMR spectra of <b>13</b>        |
| S 44-45 | $^1\text{H}$ and $^{13}\text{C}$ NMR spectra of <b>14</b>        |
| S 45-46 | $^1\text{H}$ and $^{13}\text{C}$ NMR spectra of <b>15</b>        |
| S 47-48 | $^1\text{H}$ and $^{13}\text{C}$ NMR spectra of <b>16</b>        |
| S 59-50 | $^1\text{H}$ and $^{13}\text{C}$ NMR spectra of <b>8</b>         |
| S 51-52 | $^1\text{H}$ and $^{13}\text{C}$ NMR spectra of <b>7</b>         |
| S 53-54 | $^1\text{H}$ and $^{13}\text{C}$ NMR spectra of <b>17</b>        |
| S 55-56 | $^1\text{H}$ NMR spectra and ratio of <b>18</b>                  |
| S 57-58 | $^1\text{H}$ and $^{13}\text{C}$ NMR spectra of <b>C</b>         |
| S 59-60 | $^1\text{H}$ and $^{13}\text{C}$ NMR spectra of <b>6</b>         |
| S 61-62 | $^1\text{H}$ and $^{13}\text{C}$ NMR spectra of <b>19</b>        |
| S 63-64 | $^1\text{H}$ and $^{13}\text{C}$ NMR spectra of <b>D</b>         |
| S 65-66 | $^1\text{H}$ and $^{13}\text{C}$ NMR spectra of <b>E</b>         |
| S 67-68 | $^1\text{H}$ and $^{13}\text{C}$ NMR spectra of <b>4</b>         |
| S 69-70 | $^1\text{H}$ and $^{13}\text{C}$ NMR spectra of <b>20</b>        |
| S 71-72 | $^1\text{H}$ and $^{13}\text{C}$ NMR spectra of <b>21</b>        |
| S 73-74 | $^1\text{H}$ and $^{13}\text{C}$ NMR spectra of <b>2</b>         |
| S 75-76 | $^1\text{H}$ and $^{13}\text{C}$ NMR spectra of <b>F</b>         |
| S 77-78 | $^1\text{H}$ and $^{13}\text{C}$ NMR spectra of <b>G</b>         |
| S 79-80 | $^1\text{H}$ and $^{13}\text{C}$ NMR spectra of <b>H</b>         |
| S 81-82 | $^1\text{H}$ and $^{13}\text{C}$ NMR spectra of <b>I</b>         |
| S 83-85 | $^1\text{H}$ and $^{13}\text{C}$ NMR spectra and nOe of <b>3</b> |
| S 86-87 | $^1\text{H}$ and $^{13}\text{C}$ NMR spectra of <b>23</b>        |
| S 88-89 | $^1\text{H}$ and $^{13}\text{C}$ NMR spectra of <b>K</b>         |
| S 90-91 | $^1\text{H}$ and $^{13}\text{C}$ NMR spectra of <b>L</b>         |

|         |                                                          |
|---------|----------------------------------------------------------|
| S 92-93 | $^1\text{H}$ and $^{13}\text{C}$ NMR spectra of <b>M</b> |
| S 94-95 | $^1\text{H}$ and $^{13}\text{C}$ NMR spectra of <b>1</b> |

## General Methods and Materials:

$^1\text{H}$  and  $^{13}\text{C}$  NMR spectra were recorded on a 600 MHz or a 270 MHz spectrometer. Chemical shifts are reported relative to  $\text{CDCl}_3$  ( $\delta$  7.24 ppm) for  $^1\text{H}$  NMR and  $\text{CDCl}_3$  ( $\delta$  77.23 ppm) for  $^{13}\text{C}$  NMR. Infrared (IR) spectra were obtained on a FT-IR spectrometer. Optical rotations were measured with a digital polarimeter in the solvent specified. Melting points were uncorrected. Flash chromatography was performed using the indicated solvent system on silica gel 60 (60-200 mesh). Diethyl ether, tetrahydrofuran (THF), methylene chloride ( $\text{CH}_2\text{Cl}_2$ ), and triethylamine ( $\text{Et}_3\text{N}$ ) were dried by passing through activated alumina columns with argon gas pressure.  $R_f$  values were obtained by elution in the stated solvent (v/v). Commercial reagents were used without purification unless otherwise noted. Air- and moisture-sensitive reactions were carried out under an atmosphere of argon using oven-dried glassware and standard syringe/septa techniques.

### 6-(4-Methoxy-phenoxy)-hex-1-yne (A).

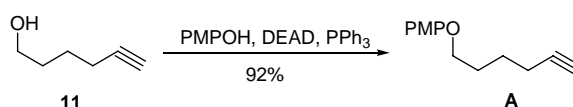

To a solution of 5-hexyn-1-ol **11** (0.196 g, 2.00 mmol) in benzene (10 mL) at  $10\text{ }^\circ\text{C}$ , containing  $\text{Ph}_3\text{P}$  (0.630 g, 2.40 mmol) and *p*-methoxyphenol (0.40 g, 3.22 mmol), was added DEAD (0.418 g, 0.240 mmol) dropwise. The reaction mixture was stirred at  $10\text{ }^\circ\text{C}$  for 2 h before the solvent was removed *in vacuo*. The crude product was triturated with  $\text{CHCl}_3$  and filtered to remove  $\text{Ph}_3\text{P}=\text{O}$ . After removal of the solution, the residue was purified by flash chromatography (1:19 EtOAc/hexanes) on silica gel to afford PMP ether **A** (0.38 g, 92%) as a white solid: m.p. =  $56\text{--}58\text{ }^\circ\text{C}$ ;  $R_f$  (30 % EtOAc/hexanes) = 0.72; IR (thin film,  $\text{cm}^{-1}$ ) 3293, 2952, 1508, 1230, 1039, 825;  $^1\text{H}$  NMR (600 MHz,  $\text{CDCl}_3$ )  $\delta$  6.80 (m, 4H), 3.91 (t,  $J = 6\text{ Hz}$ , 2H), 3.74 (s, 3H), 2.24 (dt,  $J = 7.2, 2.4\text{ Hz}$ , 2H), 1.93 (t,  $J = 2.4\text{ Hz}$ , 1H), 1.86 (m, 2H), 1.69

(m, 2H);  $^{13}\text{C}$  NMR (150 MHz,  $\text{CDCl}_3$ )  $\delta$  154.0, 153.4, 115.7, 114.9, 84.4, 68.8, 68.2, 56.0, 28.6, 25.3, 18.4; ESI HRMS Calcd for  $[\text{C}_{13}\text{H}_{16}\text{O}_2 + \text{Na}]^+$ : 227.1048, Found: 227.1042.

**Ethyl 7-(4-methoxy-phenoxy)-hept-2-ynoate (**12**).**

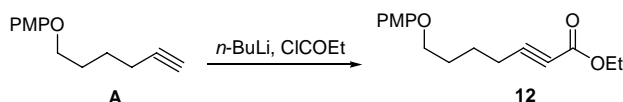

To a solution of alkyne **A** (2.4 g, 11.8 mmol) in THF (20 mL) at  $-78^\circ\text{C}$  was added *n*-BuLi (5.2 mL, 2.5 M in *n*-hexane, 13.0 mmol) dropwise and the mixture was stirred for 1 h. Then, ethylchloroformate (1.46 mL, 15.3 mmol) was added at  $-78^\circ\text{C}$  and the mixture was stirred for 1 h. The reaction mixture was warmed to  $0^\circ\text{C}$  and stirred for 15 min. The reaction was quenched with saturated aqueous  $\text{NH}_4\text{Cl}$  (10 mL). The aqueous layer was extracted with ether (2 x 50 mL). The organic layer was washed with brine (20 mL) and dried with anhydrous sodium sulfate. After removal of the solvent in *in vacuo*, the residue was purified by flash chromatography (1:9 EtOAc/hexane) on silica gel to afford ethyl heptynoate **12** (3.1 g, 95%) as a light yellow oil:  $R_f$  (30 % EtOAc/hexanes) = 0.6; IR (thin film,  $\text{cm}^{-1}$ ) 2943, 2872, 2234, 1706, 1508, 1249, 1230, 1070, 825;  $^1\text{H}$  NMR (600 MHz,  $\text{CDCl}_3$ )  $\delta$  6.83 (m, 4H), 4.22 (q,  $J$  = 7.2 Hz, 2H), 3.93 (t,  $J$  = 6.0 Hz, 2H), 3.76 (s, 3H), 2.42 (t,  $J$  = 7.2 Hz, 2H), 1.88 (m, 2H), 1.78 (m, 2H), 1.31 (t,  $J$  = 7.2 Hz, 3H);  $^{13}\text{C}$  NMR (150 MHz,  $\text{CDCl}_3$ )  $\delta$  154.0, 153.9, 153.2, 115.6, 114.8, 88.9, 73.7, 67.9, 61.9, 55.9, 28.6, 24.4, 18.6, 14.2; ESI HRMS Calcd for  $[\text{C}_{16}\text{H}_{20}\text{O}_4 + \text{Na}]^+$ : 299.1259, Found: 299.1258.

**Ethyl 7-(4-methoxy-phenoxy)-hept-2,4-dienoate (10).**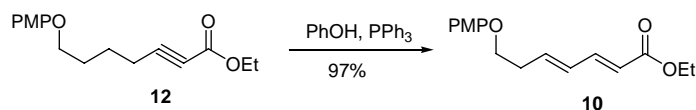

Into a 100 mL round bottom flask were added ynoate **12** (3.1 g, 11.2 mmol), Ph<sub>3</sub>P (2.94 g, 11.2 mmol), phenol (1.06 g, 11.2 mmol) and benzene (20 mL). The mixture was stirred at room temperature for 12 h. The solution was diluted with ether (50 mL) and 1N NaOH (50 mL). The layer was separated and the aqueous layer was extracted with ether (2 x 50 mL). The combined organic layers were washed (water, brine), dried (Na<sub>2</sub>SO<sub>4</sub>), and concentrated. The residue was dissolved in ether (100 mL) and MeI (4.8 g, 33.6 mmol) was added to the solution. The reaction mixture was refluxed for 12 h. The solution was filtered, concentrated, and purified by flash chromatography (1:9 EtOAc/hexanes) on silica gel to give ethyl dienoate **10** (3.0 g, 97%) as light yellow oil: R<sub>f</sub> (20 % EtOAc/hexanes) = 0.42; IR (thin film, cm<sup>-1</sup>) 2983, 2937, 1707, 1643, 1506, 1227, 1137, 1037, 999, 824; <sup>1</sup>H NMR (600 MHz, CDCl<sub>3</sub>) δ 7.28 (dd, *J* = 15.6, 10.8 Hz, 1H), 6.83 (m, 4H), 6.29 (dd, *J* = 15.6, 10.8 Hz, 1H), 6.20 (dt, *J* = 15.0, 7.2 Hz, 1H), 5.83 (d, *J* = 15.0 Hz, 1H), 4.21 (q, *J* = 7.2 Hz, 2H), 4.00 (t, *J* = 6.0 Hz, 2H), 3.76 (s, 3H), 2.63 (dt, *J* = 12.6, 6.6 Hz, 2H), 1.30 (t, *J* = 7.2 Hz, 3H); <sup>13</sup>C NMR (150 MHz, CDCl<sub>3</sub>) δ 167.2, 154.2, 153.0, 144.6, 139.6, 130.5, 120.4, 115.8, 114.8, 67.5, 60.4, 55.8, 33.1, 14.4; ESI HRMS Calcd for [C<sub>16</sub>H<sub>20</sub>O<sub>4</sub> + Na]<sup>+</sup>: 299.1259, Found: 299.1258.

**Ethyl (4*R*,5*R*)-7-(4-methoxy-phenoxy)-4,5-dihydroxy-hept-2-enoate (B).**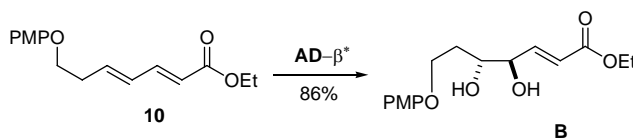

Into a 250 mL round bottom flask were added 60 mL of *t*-BuOH, 60 mL of water, K<sub>3</sub>Fe(CN)<sub>6</sub> (11.80 g, 35.8 mmol), K<sub>2</sub>CO<sub>3</sub> (4.94 g, 35.8 mmol), MeSO<sub>2</sub>NH<sub>2</sub> (1.14 g, 11.9 mmol),

(DHQD)<sub>2</sub>-PHAL (140 mg, 0.18 mmol), and OsO<sub>4</sub> (30.4 mg, 0.119 mmol). The mixture was stirred at room temperature for about 15 minutes and then cooled to 0 °C. To this solution was added dienoate **10** (3.3 g, 11.9 mmol) and the reaction was stirred vigorously at 0 °C overnight. The reaction was quenched with saturated aqueous sodium sulfite (30 mL) at room temperature. Ethyl acetate (100 mL) was added to the reaction mixture, and after separation of the layers, the aqueous phase was further extracted with the ethyl acetate (2 x 50 mL). The combined organic layers were washed with 2N KOH (20 mL) and brine to remove the methanesulfonamide, and dried over anhydrous sodium sulfate. After removal of the solvents *in vacuo*, flash chromatography on silica gel (3:7 EtOAc/hexanes) afforded diol **B** as a white solid (3.2 g, 86%): m.p. = 80-82 °C;  $[\alpha]_D^{25} +22$  (*c* 1.0, CH<sub>2</sub>Cl<sub>2</sub>); *R<sub>f</sub>* (50 % EtOAc/hexanes) = 0.32; IR (thin film, cm<sup>-1</sup>) 3428, 2956, 1709, 1509, 1230, 1038, 826; <sup>1</sup>H NMR (600 MHz, CDCl<sub>3</sub>) δ 6.99 (dd, *J* = 15.6, 4.8 Hz, 1H), 6.84 (m, 4H), 6.17 (dd, *J* = 15.6, 1.8 Hz, 1H), 4.24 (br, 1H), 4.21 (q, *J* = 7.2 Hz, 2H), 4.13 (m, 2H), 3.11 (m, 1H), 2.88 (s, 1H), 2.78 (s, 1H), 2.02 (m, 2H), 1.30 (t, *J* = 7.2 Hz, 3H); <sup>13</sup>C NMR (150 MHz, CDCl<sub>3</sub>) δ 166.4, 154.4, 152.7, 146.7, 122.9, 115.8, 115.0, 74.2, 72.3, 66.3, 60.8, 56.0, 55.9, 32.8, 14.4; ESI HRMS Calcd for [C<sub>16</sub>H<sub>22</sub>O<sub>6</sub> + Na]<sup>+</sup>: 333.1314, Found: 333.1314.

**Ethyl (4*R*,5*R*)-3-{[5-(4-methoxy-phenoxy)-ethyl]-2-oxo-[1,3]dioxolan-4-yl} acrylate (**13**).**

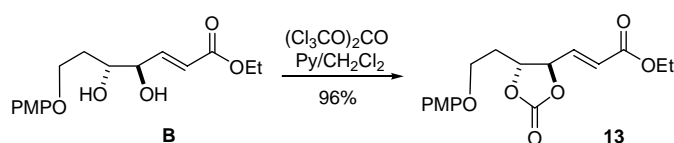

Into a 250 mL round-bottom flask were placed 1.84 g (5.93 mmol) of diol **B**, 50 mL of CH<sub>2</sub>Cl<sub>2</sub>, pyridine (2.34 g, 29.6 mmol), and DMAP (10 mg). The solution was cooled to -78 and triphosgene (1.23 g, 4.14 mmol) in 20 mL of CH<sub>2</sub>Cl<sub>2</sub> was added slowly with an addition funnel. The reaction was stirred and warmed to 0 °C in 2 h and quenched with saturated aqueous NH<sub>4</sub>Cl (40 mL). The layers were separated and the aqueous layer was extracted with ether (3 x 20 mL). The combined organic layers were washed with saturated

aqueous sodium bicarbonate (30 mL), brine (25 mL), and dried over anhydrous sodium sulfate. After removal of the solvents *in vacuo*, flash chromatography on silica gel (1:9 EtOAc/hexanes) afforded carbonate **13** as a colorless oil (1.92 g, 96%):  $[\alpha]_D^{25} +47$  (*c* 1.1, CH<sub>2</sub>Cl<sub>2</sub>); *R<sub>f</sub>* (40 % EtOAc/hexanes) = 0.57; IR (thin film, cm<sup>-1</sup>) 2939, 2836, 1802, 1718, 1508, 1228, 1169, 1032, 826; <sup>1</sup>H NMR (600 MHz, CDCl<sub>3</sub>)  $\delta$  6.89 (dd, *J* = 15.6, 6.6 Hz, 1H), 6.83 (m, 4H), 6.20 (d, *J* = 15.6 Hz, 1H), 5.06 (dd, *J* = 6.0, 5.4 Hz, 1H), 4.66 (dd, *J* = 13.2, 6.6 Hz, 1H), 4.23 (q, *J* = 7.2 Hz, 2H), 4.06-4.13 (m, 2H), 3.76 (s, 3H), 2.26 (m, 2H), 1.29 (t, *J* = 7.2 Hz, 3H); <sup>13</sup>C NMR (150 MHz, CDCl<sub>3</sub>)  $\delta$  165.1, 154.6, 153.6, 152.3, 139.3, 125.1, 115.6, 115.0, 80.1, 79.2, 63.8, 61.2, 55.9, 33.2, 14.3; ESI HRMS Calcd for [C<sub>17</sub>H<sub>20</sub>O<sub>7</sub> + Na]<sup>+</sup>: 359.1107, Found: 359.1107.

**Ethyl (5*S*)-7-(4-methoxy-phenoxy)-5-hydroxy-2-heptenoate (**14**).**

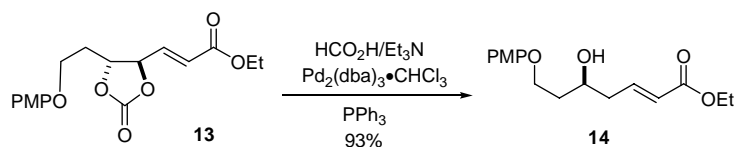

Into a 100 mL round bottomed flask maintained under argon were added Pd<sub>2</sub>(dba)<sub>3</sub>·CHCl<sub>3</sub> (29 mg, 0.028 mmol), PPh<sub>3</sub> (7.5 mg, 0.029 mmol), THF (20 mL) and carbonate **13** (1.92 g, 5.7 mmol). Triethylamine (2 mL, 14.4 mmol) and HCO<sub>2</sub>H (1 mL, 26.5 mmol) were added and the mixture was allowed to stir at room temperature until the color of the solution turned black. The reaction was quenched with saturated aqueous sodium bicarbonate (20 mL). The aqueous layer was extracted with ether (2 x 50 mL). The organic layers were combined, washed with brine (20 mL) and dried with anhydrous sodium sulfate. After removal of the solvents *in vacuo*, flash chromatography on silica gel (2:8 EtOAc/hexanes) provided alcohol **14** as a yellow oil (1.56 g, 93%):  $[\alpha]_D^{25} -3.0$  (*c* 1.2, CH<sub>2</sub>Cl<sub>2</sub>); *R<sub>f</sub>* (40 % EtOAc/hexanes) = 0.41; IR (thin film, cm<sup>-1</sup>) 3459, 2940, 2836, 1716, 1655, 1508, 1228, 1038, 825; <sup>1</sup>H NMR (600 MHz, CDCl<sub>3</sub>)  $\delta$  7.00 (ddd, *J* = 15.0, 7.2, 7.2 Hz, 1H), 6.83 (m, 4H), 5.92 (dd, *J* = 15.6, 1.2 Hz, 1H), 4.19 (q, *J* = 7.2 Hz, 2H), 4.13 (m, 1H), 4.06 (m, 2H), 3.76 (s, 3H), 2.60 (d, *J* =

3.0 Hz, 1H), 2.44 (dd,  $J = 6.6, 6.6$  Hz, 2H), 1.93 (m, 2H), 1.29 (t,  $J = 7.2$  Hz, 3H);  $^{13}\text{C}$  NMR (150 MHz,  $\text{CDCl}_3$ )  $\delta$  166.5, 154.3, 152.9, 145.0, 124.2, 115.7, 114.9, 69.0, 66.6, 60.5, 55.9, 40.4, 36.3, 14.4; ESI HRMS Calcd for  $[\text{C}_{16}\text{H}_{22}\text{O}_5 + \text{Na}]^+$ : 317.1365, Found: 317.1365.

**Ethyl 2-[(2*R*,4*R*,6*R*)-6-[(4-methoxy-phenoxy)-ethyl]-2-phenyl-1,3-dioxan-4-yl] acetate (15).**

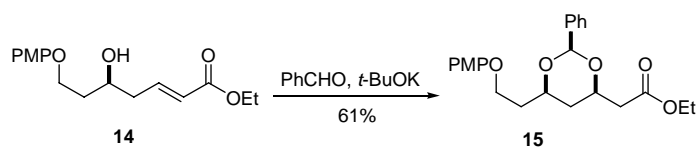

To a solution of alcohol **14** (1.56, 5.3 mmol) in THF (50 mL) at 0 °C were added benzaldehyde (0.54 mL, 5.3 mmol), followed *t*-BuOK (59.5 mg, 0.53 mmol). The solution was stirred for 15 min. The addition of benzaldehyde/*t*-BuOK was repeated 3 more times and the reaction was quenched with 50 mL of pH 7 phosphate buffer. The layers were separated, and the aqueous layer was extracted with ether (3 x 50 mL). The combined organic layers were washed, dried over anhydrous  $\text{Na}_2\text{SO}_4$ , filtered, and concentrated *in vacuo*. The crude product was purified by silica gel chromatography (1:9 EtOAc/hexanes) to produce benzylidene protected diol **15** (1.29 g, 61%) as colorless oil:  $[\alpha]_D^{25} +33$  ( $c$  1.2,  $\text{CH}_2\text{Cl}_2$ );  $R_f$  (30 % EtOAc/hexanes) = 0.46; IR (thin film,  $\text{cm}^{-1}$ ) 2916, 1734, 1508, 1231, 1027, 826, 700;  $^1\text{H}$  NMR (600 MHz,  $\text{CDCl}_3$ )  $\delta$  7.49 (m, 2H), 7.35 (m, 3H), 6.86 (m, 4H), 5.60 (s, 1H), 4.36 (dddd,  $J = 13.2, 6.6, 6.6, 2.4$  Hz, 1H), 4.19 (q,  $J = 7.2$  Hz, 2H), 4.16 (m, 2H), 4.07 (dddd,  $J = 10.8, 5.4, 5.4, 2.4$  Hz, 1H), 3.78 (s, 3H), 2.75 (dd,  $J = 15.0, 6.6$  Hz, 1H), 2.55 (dd,  $J = 15.0, 6.0$  Hz, 1H), 2.07 (m, 2H), 1.80 (ddd,  $J = 13.2, 2.4, 2.4$  Hz, 1H), 1.55 (ddd,  $J = 12.6, 12.0, 12.0$  Hz, 1H), 1.29 (t,  $J = 7.2$  Hz, 3H);  $^{13}\text{C}$  NMR (150 MHz,  $\text{CDCl}_3$ )  $\delta$  170.9, 154.0, 153.3, 138.6, 128.8, 128.3, 126.2, 115.7, 114.9, 100.8, 73.6, 73.4, 64.6, 60.8, 55.9, 41.2, 36.8, 35.9, 14.4; ESI HRMS Calcd for  $[\text{C}_{23}\text{H}_{28}\text{O}_6 + \text{Na}]^+$ : 423.1784, Found: 423.1784.

***N*-Methoxy-*N*-methyl- 2-((2*R*,4*R*,6*R*)-6-[(4-methoxy-phenoxy)-ethyl]-2-phenyl-1,3-dioxan-4-yl)acetamide (**16**).**

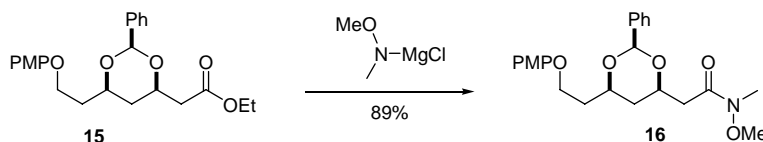

Into a 100 mL round bottomed flask maintained under argon were added ester **15** (1.29 g, 3.2 mmol), *N,O*-dimethylhydroxylamine hydrochloride (0.56 g, 5.7 mmol) and THF (30 mL). The reaction mixture was cooled to -20 °C using NaCl/ice bath. To the reaction mixture was added 2M solution of isopropylmagnesium chloride in ether (5.8 ml, 11.6 mmol) dropwise over 30 min. The reaction mixture was stirred at -20 °C for 30 min and quenched with saturated aqueous NH<sub>4</sub>Cl (20 mL). The layers were separated and the aqueous layer was extracted with ether (2 x 50 mL). The combined organic layers were washed with brine (25 mL) and dried over anhydrous sodium sulfate. After removal of the solvents *in vacuo*, flash chromatography on silica gel (3:7 EtOAc/hexanes) afforded Weinreb amide **16** as a colorless oil (1.19 g, 89%):  $[\alpha]_D^{25} +48$  (*c* 1.4, CH<sub>2</sub>Cl<sub>2</sub>); *R<sub>f</sub>* (60 % EtOAc/hexanes) = 0.46; IR (thin film, cm<sup>-1</sup>) 2937, 1660, 1508, 1230, 1111, 1027, 826, 701; <sup>1</sup>H NMR (600 MHz, CDCl<sub>3</sub>) δ 7.49 (m, 2H), 7.34 (m, 3H), 6.85 (m, 4H), 5.60 (s, 1H), 4.43 (dddd, *J* = 13.2, 6.6, 6.6, 2.4 Hz, 1H), 4.15 (m, 2H), 4.06 (dddd, *J* = 11.4, 5.4, 5.4, 1.8 Hz, 1H), 3.77 (s, 3H), 3.69 (s, 3H), 3.21 (s, 3H), 3.00 (dd, *J* = 15.6, 4.8 Hz, 1H), 2.58 (dd, *J* = 15.6, 6.6 Hz, 1H), 2.06 (m, 2H), 1.88 (ddd, *J* = 12.6, 2.4, 2.4 Hz, 1H), 1.55 (ddd, *J* = 12.6, 11.4, 11.4 Hz, 1H); <sup>13</sup>C NMR (150 MHz, CDCl<sub>3</sub>) δ 171.5, 154.0, 153.3, 138.8, 128.8, 128.3, 126.3, 115.7, 114.9, 100.9, 73.7, 64.7, 61.6, 56.0, 38.4, 37.2, 36.0, 32.2, 31.1; ESI HRMS Calcd for [C<sub>23</sub>H<sub>29</sub>NO<sub>6</sub> + Na]<sup>+</sup>: 438.1893, Found: 438.1893.

**Dimethyl 3-[(2*R*,4*R*,6*R*)-6-[(4-methoxy-phenoxy)-ethyl]-2-phenyl-1,3-dioxan-4-yl]-2-oxopropyl phosphonate (**8**).**

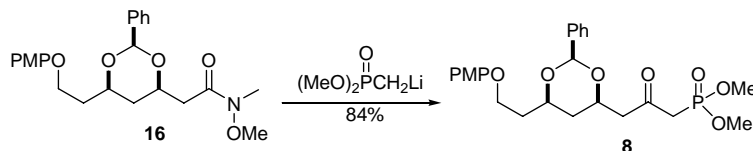

A solution of dimethyl methylphosphonate (1.42 g, 11.4 mmol) in THF (30 mL) was stirred at -78 °C under argon. To this solution was added *n*-BuLi (4.6 mL, 2.5 M in *n*-hexane, 11.5 mmol) dropwise and the mixture was stirred for 1 h. A solution of amide **16** (1.19 g, 2.86 mmol) in THF (1 mL) was added via cannula. The solution was stirred at -78 °C for 1 h. The reaction was quenched by the addition of saturated aqueous NH<sub>4</sub>Cl (20 mL). The layers were separated and the aqueous layer was extracted with EtOAc (2 x 50 mL). The combined organic layers were washed with brine (25 mL) and dried over anhydrous sodium sulfate. After removal of the solvents *in vacuo*, flash chromatography on silica gel (7:3 EtOAc/hexanes) afforded ketophosphonate **8** as a colorless oil (1.15 g, 84%):  $[\alpha]_D^{25} +24.4$  (*c* 0.75, CH<sub>2</sub>Cl<sub>2</sub>); *R<sub>f</sub>* (100 % EtOAc) = 0.38; IR (thin film, cm<sup>-1</sup>) 2955, 1717, 1508, 1231, 1025, 827, 701; <sup>1</sup>H NMR (600 MHz, CDCl<sub>3</sub>) δ 7.46 (m, 2H), 7.34 (m, 3H), 6.84 (m, 4H), 5.57 (s, 1H), 4.40 (dddd, *J* = 12.6, 7.2, 7.2, 2.4 Hz, 1H), 4.14 (m, 2H), 4.05 (dddd, *J* = 13.2, 5.4, 5.4, 1.2 Hz, 1H), 3.78 (d, *J* = 6.6 Hz, 3H), 3.77 (s, 3H), 3.76 (d, *J* = 6.6 Hz, 3H), 3.17 (m, 2H), 3.03 (dd, *J* = 16.8, 7.2 Hz, 1H), 2.81 (dd, *J* = 16.2, 5.4 Hz, 1H), 2.04 (m, 2H), 1.77 (ddd, *J* = 13.2, 2.4, 2.4 Hz, 1H), 1.51 (ddd, *J* = 13.2, 11.4, 10.8 Hz, 1H); <sup>13</sup>C NMR (150 MHz, CDCl<sub>3</sub>) δ 199.8, 199.7, 154.1, 153.2, 138.5, 128.9, 128.4, 126.2, 115.7, 114.9, 100.8, 73.6, 72.9, 64.6, 56.0, 53.3, 53.2, 53.1, 49.9, 42.9, 42.1, 36.7, 35.9; ESI HRMS Calcd for [C<sub>24</sub>H<sub>31</sub>O<sub>8</sub>P + Na]<sup>+</sup>: 501.1654, Found: 501.1656.

**(3*E*,5*Z*)-1-[(2*R*,4*R*,6*R*)-6-[2-(4-Methoxy-phenoxy)-ethyl]-2-phenyl-1,3-dioxan-4-yl]-5-methylhepta-3,5-dien-2-one (7).**

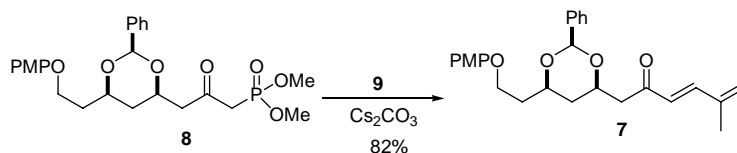

To a solution of ketophosphonate **8** (3.1 g, 6.5 mmol) in 2-propanol (10 mL) at 0 °C was added  $\text{Cs}_2\text{CO}_3$  (2.1 g, 6.4 mmol). The slurry was stirred for 5 min before angelaldehyde (1.09 g, 13.0 mmol) was added. The cloudy white reaction mixture was stirred for 3 h at room temperature. The mixture was diluted with ether (20 mL) and saturated aqueous  $\text{NH}_4\text{Cl}$  (20 mL). The layers were separated and the aqueous layer was extracted with ether (2 x 50 mL). The combined organic layers were washed with brine (25 mL), dried over anhydrous sodium sulfate, filtered and concentrated to an oil. Flash chromatography on silica gel (1:9 EtOAc/hexanes) afforded dienone **7** as a colorless oil (2.3 g, 82%):  $[\alpha]_D^{25} +42$  (*c* 0.5,  $\text{CH}_2\text{Cl}_2$ );  $R_f$  (30 % EtOAc/hexanes) = 0.55; IR (thin film,  $\text{cm}^{-1}$ ) 2916, 2872, 1683, 1631, 1656, 1588, 1507, 1229, 1125, 1015, 825, 699;  $^1\text{H}$  NMR (600 MHz,  $\text{CDCl}_3$ )  $\delta$  7.72 (d,  $J = 15.6$  Hz, 1H), 7.49 (m, 2H), 7.35 (m, 3H), 6.86 (m, 4H), 6.24 (d,  $J = 15.6$  Hz, 1H), 5.91 (q,  $J = 6.6$  Hz, 1H), 5.61 (s, 1H), 4.45 (dddd,  $J = 13.2, 6.6, 6.0, 2.4$  Hz, 1H), 4.16 (m, 2H), 4.07 (dddd,  $J = 10.8, 5.4, 5.4, 1.2$  Hz, 1H), 3.12 (dd,  $J = 16.2, 6.6$  Hz, 1H), 2.79 (dd,  $J = 16.2, 6.6$  Hz, 1H), 2.06 (m, 2H), 1.87 (s, 3H), 1.86 (m, 4H), 1.55 (ddd,  $J = 12.6, 11.4, 11.4$  Hz, 1H);  $^{13}\text{C}$  NMR (150 MHz,  $\text{CDCl}_3$ )  $\delta$  198.4, 154.0, 153.2, 139.5, 138.7, 135.6, 132.0, 128.8, 128.3, 126.7, 126.2, 115.7, 114.8, 100.7, 73.7, 73.6, 64.6, 55.9, 46.9, 37.2, 35.9, 20.1, 14.0; ESI HRMS Calcd for  $[\text{C}_{27}\text{H}_{32}\text{O}_5 + \text{Na}]^+$ : 459.2148, Found: 459.2150.

**(*E,5S,6R*)-1-((2*R,4R,6R*)-6-[2-(4-Methoxy-phenoxy)-ethyl]-2-phenyl-1,3-dioxan-4-yl)-5,6-dihydroxy-5-methylhept-3-en-2-one (**17**).**

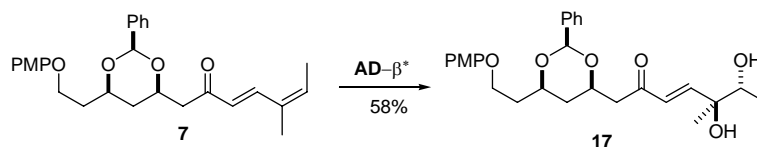

Into a 100 mL round bottom flask were added 10 mL of *t*-BuOH, 10 mL of water, K<sub>3</sub>Fe(CN)<sub>6</sub> (1.11 g, 3.37 mmol), K<sub>2</sub>CO<sub>3</sub> (0.46 g, 3.37 mmol), NaHCO<sub>3</sub> (0.3 g, 3.37 mmol), MeSO<sub>2</sub>NH<sub>2</sub> (0.213 g, 1.12 mmol), (DHQD)<sub>2</sub>-PHAL (26.2 mg, 0.036 mmol), and OsO<sub>4</sub> (5.7 mg, 0.024 mmol). The mixture was stirred at room temperature for about 15 minutes and then cooled to 0 °C. To this solution was added dienone **7** (0.49 g, 1.12 mmol) and the reaction was stirred vigorously at 0 °C for 5 h. The reaction was quenched with saturated aqueous sodium sulfite (10 mL). Ethyl acetate (20 mL) was added to the reaction mixture, and after separation of the layers, the aqueous phase was further extracted with ethyl acetate (2 x 20 mL). The combined organic layers were washed with brine and dried over anhydrous sodium sulfate. After removal of the solvents *in vacuo*, flash chromatography on silica gel (4:6 EtOAc/hexanes) afforded starting material dienone **7** (0.15 g, 30%) and diol **17** (0.31 g, 58%) as a colorless oil:  $[\alpha]_D^{25} +37$  (*c* 1.3, CH<sub>2</sub>Cl<sub>2</sub>); *R<sub>f</sub>* (80 % EtOAc/hexanes) = 0.44; IR (thin film, cm<sup>-1</sup>) 3452, 2934, 1665, 1628, 1508, 1230, 1017, 826, 700; <sup>1</sup>H NMR (600 MHz, CDCl<sub>3</sub>) δ 7.46 (m, 2H), 7.33 (m, 3H), 6.85 (m, 5H), 6.43 (d, *J* = 16.2 Hz, 1H), 5.57 (s, 1H), 5.02 (br, 1H), 4.41 (dddd, *J* = 13.2, 6.0, 6.0, 1.8 Hz, 1H), 4.13 (m, 2H), 4.05 (dddd, *J* = 11.4, 6.0, 6.0, 2.4 Hz, 1H), 3.77 (s, 3H), 3.67 (q, *J* = 6.6 Hz, 1H), 3.07 (dd, *J* = 15.6, 6.6 Hz, 1H), 2.71 (dd, *J* = 16.2, 5.4 Hz, 1H), 2.36 (br, 1H), 2.05 (m, 2H), 1.80 (ddd, *J* = 13.2, 2.4, 2.4 Hz, 1H), 1.53 (ddd, *J* = 12.6, 11.4, 11.4 Hz, 1H), 1.29 (s, 3H), 1.12 (d, *J* = 6.6 Hz, 3H); <sup>13</sup>C NMR (150 MHz, CDCl<sub>3</sub>) δ 198.1, 154.0, 153.2, 149.0, 138.6, 129.4, 128.9, 128.3, 126.2, 115.7, 114.9, 100.8, 75.6, 73.9, 73.7, 73.4, 64.6, 55.9, 46.8, 37.0, 35.9, 24.4, 18.2; ESI HRMS Calcd for [C<sub>27</sub>H<sub>34</sub>O<sub>7</sub> + Na]<sup>+</sup>: 493.2202, Found: 493.2204.

**(4*S*,5*R*)-4-[(*E*)-4-[(2*R*,4*R*,6*R*)-6-[2-(4-Methoxy-phenoxy)-ethyl]-2-phenyl-1,3-dioxan-4-yl]-3-oxobut-1-enyl]-4,5-dimethyl-1,3-dioxolan-2-one (C).**

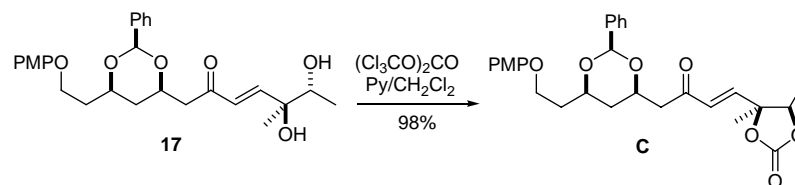

Into a 50 mL round-bottom flask were placed 0.46 g (0.98 mmol) of diol **17**, 10 mL of CH<sub>2</sub>Cl<sub>2</sub>, pyridine (0.39 g, 4.9 mmol), and DMAP (2 mg). The solution was cooled to -78 and triphosgene (0.2 g, 0.67 mmol) in 2 mL of CH<sub>2</sub>Cl<sub>2</sub> was added dropwise. The reaction was stirred and warmed to 0 °C in 2 h and quenched with saturated aqueous NH<sub>4</sub>Cl (10 mL). The layers were separated and the aqueous layer was extracted with ether (2 x 20 mL). The combined organic layers were washed with saturated aqueous sodium bicarbonate (10 mL), brine (20 mL), and dried over anhydrous sodium sulfate. After removal of the solvents *in vacuo*, flash chromatography on silica gel (2:8 EtOAc/hexanes) afforded carbonate **C** as a colorless oil (0.47 g, 98%):  $[\alpha]_D^{25} +49$  (*c* 1.5, CH<sub>2</sub>Cl<sub>2</sub>); *R<sub>f</sub>* (60 % EtOAc/hexanes) = 0.65; IR (thin film, cm<sup>-1</sup>) 2951, 2877, 1802, 1701, 1677, 1636, 1508, 1347, 1230, 1004, 827, 701; <sup>1</sup>H NMR (600 MHz, CDCl<sub>3</sub>) δ 7.45 (m, 2H), 7.34 (m, 3H), 6.85 (m, 4H), 6.66 (d, *J* = 15.6 Hz, 1H), 6.63 (d, *J* = 15.6 Hz, 1H), 5.57 (s, 1H), 4.53 (q, *J* = 6.6 Hz, 1H), 4.41 (dddd, *J* = 13.2, 6.6, 6.6, 1.8 Hz, 1H), 4.15 (m, 2H), 4.06 (dddd, *J* = 10.8, 6.0, 6.0, 1.2 Hz, 1H), 3.77 (s, 3H), 3.04 (dd, *J* = 16.2, 7.8 Hz, 1H), 2.71 (dd, *J* = 16.2, 4.8 Hz, 1H), 2.05 (m, 2H), 1.80 (ddd, *J* = 12.6, 1.8, 1.8 Hz, 1H), 1.56 (s, 3H), 1.55 (ddd, *J* = 12.0, 11.4, 11.4 Hz, 1H), 1.24 (d, *J* = 7.2 Hz, 3H); <sup>13</sup>C NMR (150 MHz, CDCl<sub>3</sub>) δ 196.7, 154.0, 153.3, 153.2, 140.4, 138.5, 130.1, 128.9, 128.4, 126.2, 115.7, 114.9, 100.8, 84.4, 81.9, 73.6, 73.3, 64.5, 55.9, 47.8, 37.0, 35.9, 24.4, 16.0; ESI HRMS Calcd for [C<sub>28</sub>H<sub>32</sub>O<sub>8</sub> + Na]<sup>+</sup>: 519.1995, Found: 519.1997.

**(*E*,5*S*,6*R*)-1-((2*R*,4*R*,6*R*)-6-[2-(4-Methoxy-phenoxy)-ethyl]-2-phenyl-1,3-dioxan-4-yl)-6-dihydroxy-5-methylhept-3-en-2-one (6).**

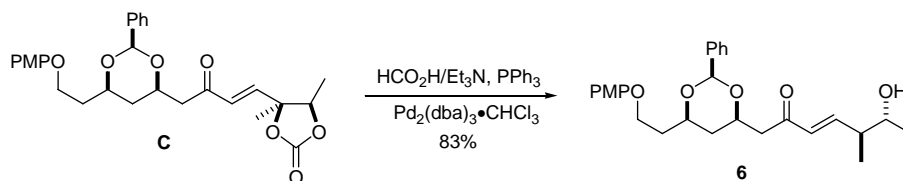

Into a 10 mL round bottomed flask maintained under argon were added  $\text{Pd}_2(\text{dba})_3 \cdot \text{CHCl}_3$  (2.48 mg, 0.0024 mmol),  $\text{PPh}_3$  (0.63 mg, 0.0024 mmol), THF (3 mL) and carbonate **C** (0.12 g, 0.24 mmol). Triethylamine (167  $\mu\text{L}$ , 1.2 mmol) and  $\text{HCO}_2\text{H}$  (45  $\mu\text{L}$ , 1.2 mmol) were added and the mixture was allowed to stir at room temperature until the color of the solution turned black. The reaction was quenched with saturated aqueous sodium bicarbonate (20 mL). The aqueous layer was extracted with ether (2 x 20 mL). The organic layers were combined, washed with brine (20 mL) and dried with anhydrous sodium sulfate. After removal of the solvents *in vacuo*, flash chromatography on silica gel (2:8 EtOAc/hexanes) provided alcohol **6** as a yellow oil (90 mg, 83%):  $[\alpha]_D^{25} +8$  (*c* 1.0,  $\text{CH}_3\text{OH}$ );  $R_f$  (60 % EtOAc/hexanes) = 0.53; IR (thin film,  $\text{cm}^{-1}$ ) 3448, 2963, 2931, 1665, 1624, 1508, 1230, 1027, 826, 700;  $^1\text{H}$  NMR (600 MHz,  $\text{CDCl}_3$ )  $\delta$  7.47 (m, 2H), 7.34 (m, 3H), 6.85 (m, 5H), 6.18 (d,  $J = 16.2$  Hz, 1H), 5.58 (s, 1H), 4.41 (dddd,  $J = 13.2, 8.4, 6.6, 2.4$  Hz, 1H), 4.15 (m, 2H), 4.06 (dddd,  $J = 10.8, 6.0, 6.0, 1.2$  Hz, 1H), 3.77 (s, 3H), 3.72 (dq,  $J = 6.0, 6.0$  Hz, 1H), 3.08 (dd,  $J = 16.2, 7.2$  Hz, 1H), 2.71 (dd,  $J = 16.2, 6.0$  Hz, 1H), 2.34 (m, 1H), 2.05 (m, 2H), 1.82 (ddd,  $J = 13.2, 2.4, 1.8$  Hz, 1H), 1.53 (ddd,  $J = 13.2, 11.4, 10.8$  Hz, 1H), 1.48 (br, 1H), 1.16 (d,  $J = 6.6$  Hz, 3H), 1.09 (d,  $J = 6.6$  Hz, 3H);  $^{13}\text{C}$  NMR (150 MHz,  $\text{CDCl}_3$ )  $\delta$  198.0, 154.0, 153.3, 149.8, 138.7, 131.7, 128.9, 128.3, 126.3, 115.7, 114.9, 100.8, 73.7, 73.5, 71.0, 64.6, 56.0, 55.9, 64.2, 44.5, 37.2, 36.0, 21.0, 15.8; ESI HRMS Calcd for  $[\text{C}_{27}\text{H}_{34}\text{O}_6 + \text{Na}]^+$ : 477.2253, Found: 477.2255.

**(2*S*,4*R*,6*R*,8*R*,9*S*)-4-Hydroxy-8,9-dimethyl-2-[2-(4-methoxy-phenoxy)-ethyl]-1,7-dioxaspiro[5.5]undecane (**19**).**

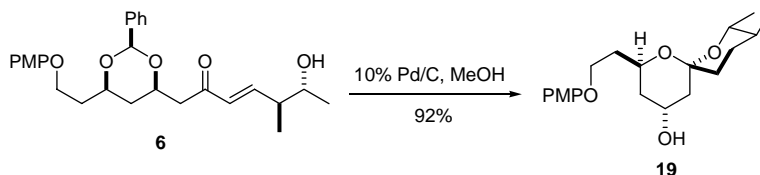

To a solution of alcohol **6** (0.63 g, 1.38 mmol) in methanol (15 mL) was added palladium on carbon (10%, 0.15 g, 0.14 mmol). The reaction mixture was stirred under H<sub>2</sub> (1 atm) for 12 h. Ethyl ether (20 ml) was added and the mixture was filtered through a pad of celite. After removal of the solvents *in vacuo*, flash chromatography on silica gel (2:8 EtOAc/hexanes) provided spiroketal **19** as a colorless solid (0.45 g, 92%): m.p. = 86-88 °C;  $[\alpha]_D^{25} +67$  (*c* 0.8, CH<sub>2</sub>Cl<sub>2</sub>); *R<sub>f</sub>* (40 % EtOAc/hexanes) = 0.5; IR (thin film, cm<sup>-1</sup>) 3510, 2930, 1509, 1231, 1086, 1041; <sup>1</sup>H NMR (600 MHz, CDCl<sub>3</sub>) δ 6.83 (m, 4H), 4.26 (d, *J* = 10.2 Hz, 1H), 4.25 (dddd, *J* = 12.0, 9.6, 3.0, 2.4 Hz, 1H), 4.16 (dddd, *J* = 13.8, 10.2, 9.6, 4.8 Hz, 1H), 4.08 (ddd, *J* = 9.0, 3.0, 3.0 Hz, 1H), 4.02 (ddd, *J* = 9.0, 5.4, 3.6 Hz, 1H), 3.77 (s, 3H), 3.25 (dq, *J* = 10.2, 6.0 Hz, 1H), 2.00 (m, 1H), 1.85 (m, 3H), 1.60 (m, 2H), 1.49 (m, 4H), 1.17 (m, 1H), 1.06 (d, *J* = 6.0 Hz, 3H), 1.05 (d, *J* = 6.6 Hz, 3H); <sup>13</sup>C NMR (150 MHz, CDCl<sub>3</sub>) δ 154.0, 153.4, 115.3, 114.9, 98.2, 72.0, 65.6, 64.1, 60.1, 56.0, 40.4, 38.7, 36.3, 35.8, 35.6, 27.6, 19.7, 17.6; ESI HRMS Calcd for [C<sub>20</sub>H<sub>30</sub>O<sub>5</sub> + Na]<sup>+</sup>: 373.1992, Found: 373.1991.

**(2*S*,4*R*,6*R*,8*R*,9*S*)-4-[(*tert*-Butyldiphenylsilyl)-oxy]-8,9-dimethyl-2-[2-(4-methoxy-phenoxy)-ethyl]-1,7-dioxaspiro[5.5]undecane (**D**).**

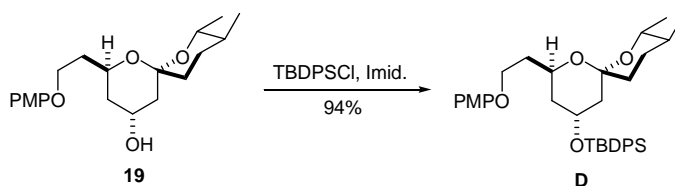

Imidazole (0.12 g, 1.76 mmol) and TBDPSCl (0.22 g, 0.80 mmol) were added to a solution of alcohol **19** (0.20 g, 0.57 mmol) in DMF (6 mL). After stirring at 50 °C for 12 h, the mixture was cooled to room temperature and diluted with ether (20 mL) and water (10 mL). The organic layer was separated, washed with brine and dried (Na<sub>2</sub>SO<sub>4</sub>). After removal of the solvents *in vacuo*, flash chromatography on silica gel (1:19 EtOAc/hexanes) yielded TBDPS ether **D** (0.32 g, 94%) as a colorless oil:  $[\alpha]_D^{25} +32$  (*c* 2.4, CH<sub>2</sub>Cl<sub>2</sub>); *R<sub>f</sub>* (10 % EtOAc/hexanes) = 0.42; IR (thin film, cm<sup>-1</sup>) 3049, 2951, 2928, 1508, 1230, 1089, 822, 701; <sup>1</sup>H NMR (600 MHz, CDCl<sub>3</sub>)  $\delta$  7.80 (m, 2H), 7.72 (m, 2H), 7.44 (m, 2H), 7.38 (m, 4H), 6.87 (m, 4H), 4.52 (m, 1H), 4.16 (m, 2H), 4.05 (ddd, *J* = 11.2, 5.4, 5.4 Hz, 1H), 3.80 (s, 3H), 3.31 (dq, *J* = 10.2, 6.6 Hz, 1H), 1.88 (m, 3H), 1.61 (m, 1H), 1.42-1.55 (m, 4H), 1.36 (ddd, *J* = 14.4, 12.0, 4.8 Hz, 1H), 1.29 (dd, *J* = 7.2, 7.2 Hz, 1H), 1.22 (m, 1H), 1.13 (d, *J* = 7.8 Hz, 3H), 1.12 (s, 9H), 0.64 (d, *J* = 6.6 Hz, 3H); <sup>13</sup>C NMR (150 MHz, CDCl<sub>3</sub>)  $\delta$  153.9, 153.5, 136.3, 136.1, 134.9, 134.8, 129.7, 129.6, 127.7, 127.5, 115.4, 114.8, 96.3, 71.3, 66.1, 64.6, 60.2, 56.0, 41.8, 38.9, 36.8, 36.5, 35.7, 28.2, 27.2, 19.8, 19.5, 18.0; ESI HRMS Calcd for [C<sub>36</sub>H<sub>48</sub>O<sub>5</sub>Si + Na]<sup>+</sup>: 611.3169, Found: 611.3172.

**(2*R*,4*R*,6*R*,8*R*,9*S*)-4-[(*tert*-Butyldiphenylsilyl)-oxy]-2-(2-hydroxyethyl)-8,9-dimethyl-1,7-dioxaspiro[5.5]undecane (**E**).**

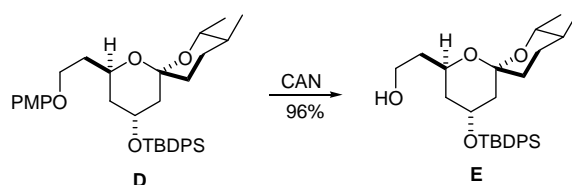

To a solution of **D** (0.32 g, 0.54 mmol) in CH<sub>3</sub>CN-H<sub>2</sub>O (5:1) (10 mL) at 0 °C was added ceric ammonium nitrate (0.60 g, 1.09 mmol). After 10 min the mixture was diluted with EtOAc (50 mL), washed with brine (20 mL), dried over Na<sub>2</sub>SO<sub>4</sub>, filtered, and evaporated. The residue was purified by flash chromatography (1:9 EtOAc/hexanes) on silica gel to give the expected product alcohol **E** (0.25 g, 96%) as a yellow oil:  $[\alpha]_D^{25} +28$  (*c* 2.4, CH<sub>2</sub>Cl<sub>2</sub>); *R<sub>f</sub>* (30 %

EtOAc/hexanes) = 0.54; IR (thin film,  $\text{cm}^{-1}$ ) 3452, 3072, 2929, 2858, 1428, 1073, 701;  $^1\text{H}$  NMR (600 MHz,  $\text{CDCl}_3$ )  $\delta$  7.77 (m, 2H), 7.68 (m, 2H), 7.43 (m, 2H), 7.37 (m, 4H), 4.43 (m, 1H), 4.10 (m, 1H), 3.83 (m, 2H), 3.43 (dq,  $J = 9.6, 6.0$  Hz, 1H), 2.92 (br, 1H), 1.86 (ddd,  $J = 13.8, 2.4, 2.4$  Hz, 1H), 1.70 (m, 2H), 1.38-1.55 (m, 7H), 1.27 (m, 1H), 1.26 (d,  $J = 6.0$  Hz, 3H), 1.09 (s, 9H), 0.88 (d,  $J = 6.6$  Hz, 3H);  $^{13}\text{C}$  NMR (150 MHz,  $\text{CDCl}_3$ )  $\delta$  136.3, 136.0, 134.7, 134.6, 129.7, 129.6, 127.7, 127.6, 96.7, 71.8, 65.7, 65.4, 62.1, 41.6, 38.7, 37.7, 36.5 (2C), 28.3, 27.2, 19.9, 19.5, 18.2; ESI HRMS Calcd for  $[\text{C}_{29}\text{H}_{42}\text{O}_4\text{Si} + \text{Na}]^+$ : 505.2750, Found: 505.2752.

**2-[(2*S*,4*R*,6*R*,8*R*,9*S*)-4-[(*tert*-Butyldiphenylsilyl)-oxy]-8,9-dimethyl-1,7-dioxaspiro [5.5]undecyl}-ethanal (**4**).**

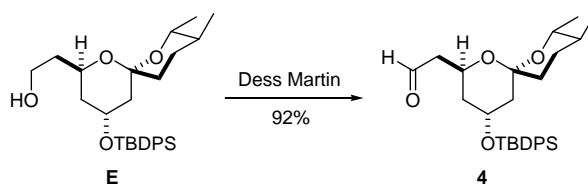

To a solution of alcohol **E** (0.25 g, 0.52 mmol) in  $\text{CH}_2\text{Cl}_2$  (5 mL) at room temperature was added Dess-Martin periodinane (0.44 g, 1.04 mmol). The resulting mixture was stirred for 3 h before being quenched with saturated  $\text{Na}_2\text{S}_2\text{O}_3 \cdot \text{NaHCO}_3$  (10 mL). The mixture was extracted with ether (2 x 20 mL). The combined organic layers were washed with brine, dried over  $\text{Na}_2\text{SO}_4$ , filtered, and evaporated. The residue was purified by flash chromatography (1:19 EtOAc/hexanes) on silica gel to give the expected product aldehyde **4** (0.23 g, 92%) as a colorless oil:  $[\alpha]_D^{25} +43$  (c 1.3,  $\text{CH}_2\text{Cl}_2$ );  $R_f$  (20 % EtOAc/hexanes) = 0.62; IR (thin film,  $\text{cm}^{-1}$ ) 3048, 2956, 2929, 2858, 1729, 1428, 1083, 702;  $^1\text{H}$  NMR (600 MHz,  $\text{CDCl}_3$ )  $\delta$  9.85 (dd,  $J = 3.0, 1.8$  Hz, 1H), 7.76 (m, 2H), 7.67 (m, 2H), 7.41 (m, 2H), 7.35 (m, 4H), 4.72 (dddd,  $J = 13.2, 9.0, 4.2, 1.8$  Hz, 1H), 4.10 (dddd,  $J = 6.6, 6.0, 3.0, 3.0$  Hz, 1H), 3.37 (dq,  $J = 10.2, 6.6$  Hz, 1H), 2.50 (ddd,  $J = 15.6, 9.0, 3.0$  Hz, 1H), 2.40 (ddd,  $J = 15.6, 4.2, 1.8$  Hz, 1H), 1.85 (ddd,  $J = 14.4, 2.4, 1.8$  Hz, 1H), 1.59 (m, 1H), 1.47 (m, 4H), 1.38 (m, 2H), 1.26 (m, 1H), 1.23

(d,  $J = 6.0$  Hz, 3H), 1.08 (s, 9H), 0.83 (d,  $J = 6.6$  Hz, 3H);  $^{13}\text{C}$  NMR (150 MHz,  $\text{CDCl}_3$ )  $\delta$  201.8, 136.3, 136.0, 134.6, 134.5, 129.8, 129.6, 127.8, 127.6, 96.6, 71.9, 65.6, 60.2, 49.6, 41.4, 38.5, 36.7, 36.6, 27.9, 27.1, 19.9, 19.4, 18.2; ESI HRMS Calcd for  $[\text{C}_{29}\text{H}_{40}\text{O}_4\text{Si} + \text{Na}]^+$ : 503.2594, Found: 503.2586.

**(2R)-1-[(2R,4R,6R,8R,9S)-4-[(*tert*-Butyldiphenylsilyl)-oxy]-8,9-dimethyl-1,7-dioxaspiro[5.5]undecyl]-3-methylbut-3-en-2-ol (20).**

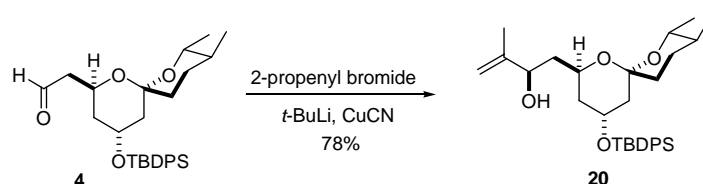

To 20 mL of ether at  $-78\text{ }^{\circ}\text{C}$  under argon was added *t*-BuLi (1.5 M in pentane, 15.6 mL, 23.4 mmol) followed by addition of neat 2-propenyl bromide (1.04 mL, 11.76 mmol). The reaction mixture was stirred at  $-78\text{ }^{\circ}\text{C}$  for 1 h before being transferred via cannula to another flask which was charged with CuCN (0.525 g, 5.86 mmol) in ether (50 mL) at  $-78\text{ }^{\circ}\text{C}$  under argon. The resulting mixture was stirred for 20 min at  $-78\text{ }^{\circ}\text{C}$  and then warmed to  $0\text{ }^{\circ}\text{C}$  and stirred until all the CuCN dissolved. The solution was recooled to  $-78\text{ }^{\circ}\text{C}$  and neat benzaldehyde (100  $\mu\text{L}$ , 1 mmol) was added. After 10 min, aldehyde **4** (0.94 g, 1.96 mmol) in ether (3 mL) was added dropwise. After 10 min, the solution was warmed to  $0\text{ }^{\circ}\text{C}$  and quenched with saturated aqueous  $\text{NH}_4\text{Cl}$  (30 mL). The aqueous layer was extracted with ether (2 x 100 mL), and the combined organic layers were washed with  $\text{NH}_4\text{OH}$  and brine, dried over  $\text{Na}_2\text{SO}_4$ , filtered, and evaporated. The residue was purified by flash chromatography (1:19 EtOAc/hexanes) on silica gel to give the expected product alcohol **20** (0.80 g, 78%) as a colorless oil:  $[\alpha]_D^{25} +31$  (c 1.5,  $\text{CH}_2\text{Cl}_2$ );  $R_f$  (20 % EtOAc/hexanes) = 0.59; IR (thin film,  $\text{cm}^{-1}$ ) 3436, 3071, 2928, 2858, 1450, 1428, 1378, 1111, 1076, 701;  $^1\text{H}$  NMR (600 MHz,  $\text{CDCl}_3$ )  $\delta$  7.75 (m, 2H), 7.66 (m, 2H), 7.40 (m, 2H), 7.35 (m, 4H), 5.08 (s, 1H), 4.89 (s, 1H), 4.50 (dddd,  $J = 13.2, 10.8, 9.0, 4.2$  Hz, 1H), 4.30 (m, 1H), 4.09 (dddd,  $J = 6.6, 6.6, 4.8, 4.8$  Hz, 1H), 3.52

(dq,  $J = 9.6, 6.0$  Hz, 1H), 3.14 (d,  $J = 4.2$  Hz, 1H), 1.84 (m, 1H), 1.74 (m, 2H), 1.73 (s, 3H), 1.45-1.54 (m, 6H), 1.40 (dd,  $J = 13.8, 4.8$  Hz, 1H), 1.26 (m, 1H), 1.19 (d,  $J = 6.0$  Hz, 3H), 1.06 (s, 9H), 0.85 (d,  $J = 6.6$  Hz, 3H);  $^{13}\text{C}$  NMR (150 MHz,  $\text{CDCl}_3$ )  $\delta$  147.4, 136.3, 136.0, 134.7, 134.6, 129.7, 129.6, 127.7, 127.6, 110.7, 96.8, 72.9, 71.7, 65.8, 62.3, 41.7, 40.0, 38.4, 36.7, 36.6, 28.3, 27.1, 19.7, 19.4, 18.9, 18.3; ESI HRMS Calcd for  $[\text{C}_{32}\text{H}_{46}\text{O}_4\text{Si} + \text{Na}]^+$ : 545.3063, Found: 545.3065.

**(2*R*)-2-(Allyloxy)-1-[(2*R*,4*R*,6*R*,8*R*,9*S*)-4-[(*tert*-butyldiphenylsilyl)-oxy]-8,9-dimethyl-1,7-dioxaspiro[5.5]undecyl]-3-methylbut-3-ene (21).**

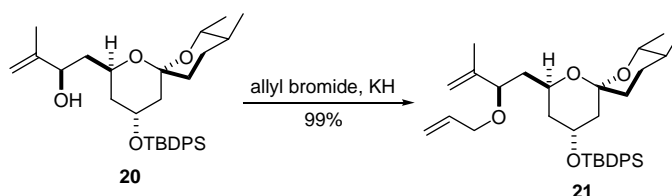

A 30 % suspension of KH in mineral oil (77 mg, equivalent to ca. 0.58 mmol of active hydride) was washed three times under argon with dry ether. Dry THF (2 mL) was then added, followed by addition of 18-crown-6 (1 mg) and a solution of alcohol **20** (0.15 g, 0.29 mmol) in dry THF (1 mL). The solution was stirred at room temperature for 10 min. Allyl bromide (52  $\mu\text{L}$ , 0.58 mmol) was then added dropwise, followed by tetrabutylammonium iodide (1 mg). The reaction mixture was stirred for 3 h before being quenched with careful addition of water (5 mL). The aqueous layer was extracted with ether (2 x 20 mL), and the combined organic layers were washed with brine, dried over  $\text{Na}_2\text{SO}_4$ , filtered, and evaporated. The residue was purified by flash chromatography (1:19 EtOAc/hexanes) on silica gel to give the allyl ether **21** (0.16 g, 99%) as a colorless oil:  $[\alpha]_D^{25} +40$  ( $c$  1.0,  $\text{CH}_2\text{Cl}_2$ );  $R_f$  (10 % EtOAc/hexanes) = 0.56; IR (thin film,  $\text{cm}^{-1}$ ) 3072, 2951, 2927, 1428, 1106, 1071, 701;  $^1\text{H}$  NMR (600 MHz,  $\text{CDCl}_3$ )  $\delta$  7.75 (m, 2H), 7.66 (m, 2H), 7.38 (m, 2H), 7.34 (m, 4H), 5.92 (dddd,  $J = 17.4, 16.2, 10.8, 5.4$  Hz, 1H), 5.28 (ddd,  $J = 17.4, 3.0, 1.8$  Hz, 1H), 5.13 (ddd,  $J = 10.2, 3.0, 1.8$  Hz, 1H), 4.92 (s, 1H), 4.88 (dd,  $J = 1.8, 1.2$  Hz, 1H), 4.39 (dddd,  $J = 13.2, 12.0,$

3.0, 3.0 Hz, 1H), 4.06 (dddd,  $J = 6.6, 6.6, 3.0, 3.0$  Hz, 1H), 3.98 (dd,  $J = 10.2, 3.0$  Hz, 1H), 3.94 (dddd,  $J = 12.6, 5.4, 1.8, 1.2$  Hz, 1H), 3.69 (dddd,  $J = 12.0, 5.4, 1.8, 1.2$  Hz, 1H), 3.43 (dq,  $J = 9.6, 6.0$  Hz, 1H), 1.80 (ddd,  $J = 13.8, 2.4, 2.4$  Hz, 1H), 1.69 (m, 1H), 1.67 (s, 3H), 1.42-1.57 (m, 7H), 1.35 (dd,  $J = 13.8, 3.6$  Hz, 1H), 1.26 (m, 1H), 1.18 (d,  $J = 6.6$  Hz, 3H), 1.06 (s, 9H), 0.83 (d,  $J = 6.6$  Hz, 1H);  $^{13}\text{C}$  NMR (150 MHz,  $\text{CDCl}_3$ )  $\delta$  145.5, 136.4, 136.1, 135.2, 135.0, 134.8, 129.6, 129.5, 127.7, 127.5, 116.4, 113.2, 96.2, 80.1, 71.3, 69.4, 66.1, 60.5, 41.8, 41.5, 39.3, 36.9, 36.7, 28.3, 27.2, 19.9, 19.5, 18.4, 16.9; ESI HRMS Calcd for  $[\text{C}_{35}\text{H}_{50}\text{O}_4\text{Si} + \text{Na}]^+$ : 585.3376, Found: 585.3380.

**(5*R*)-1-[(2*R*,4*R*,6*R*,8*R*,9*S*)-4-[(*tert*-Butyldiphenylsilyl)-oxy]-8,9-dimethyl-1,7-dioxaspiro[5.5]undecan-2-yl]-3,5-dimethyl-2(*E*)-hexen-6-al (2).**

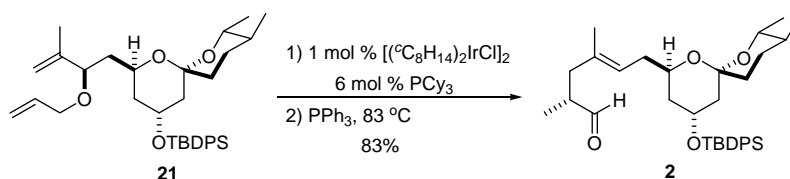

A solution of  $[(\text{C}_8\text{H}_{14})_2\text{IrCl}]_2$  (1.27 mg, 1.4  $\mu\text{mol}$ ) and  $\text{PCy}_3$  (2.39 mg, 8.5  $\mu\text{mol}$ ) in  $\text{CH}_2\text{Cl}_2$  (0.1 mL) was added to a solution of  $\text{NaBPh}_4$  (0.97 mg, 2.8  $\mu\text{mol}$ ) in 1,2-DCE/acetone (25:1) (2 mL). The resulting yellow solution was stirred for 5 min at room temperature. Allyl ether **21** (80 mg, 0.14 mmol) in 1,2-DCE (1 mL) was added and the reaction mixture was stirred for 30 min before the addition of  $\text{PPh}_3$  (2.23 mg, 8.5  $\mu\text{mol}$ ). The resulting solution was heated at reflux (83 °C) for 24 h. Evaporating the solvent provided the crude aldehyde product that was used in the subsequent reaction without purification. For characterization purposes, the solvent was removed in vacuo and the residue was purified by flash chromatography (1:19 ether/hexanes) on florisil to give the aldehyde **2** (66 mg, 83%) as a yellow oil:  $[\alpha]_D^{25} +24$  ( $c$  0.9,  $\text{CH}_2\text{Cl}_2$ );  $R_f$  (15 % EtOAc/hexanes) = 0.66; IR (thin film,  $\text{cm}^{-1}$ ) 3071, 2928, 1728, 1428, 1377, 1105, 1073, 991, 701;  $^1\text{H}$  NMR (600 MHz, Acetone- $d_6$ )  $\delta$  9.61 (d,  $J = 1.8$  Hz, 1H), 7.79 (m, 2H), 7.70 (m, 2H), 7.44 (m, 2H), 7.41 (m, 4H), 5.36 (dd,  $J = 7.8, 6.6$  Hz, 1H), 4.20 (dddd,

$J = 12.6, 9.0, 6.6, 1.8$  Hz, 1H), 4.15 (dddd,  $J = 6.0, 6.0, 3.0, 3.0$  Hz, 1H), 3.48 (dq,  $J = 9.6, 6.0$  Hz, 1H), 1.21 (d,  $J = 6.6$  Hz, 3H), 1.08 (s, 9H), 1.02 (d,  $J = 7.2$  Hz, 3H), 0.84 (d,  $J = 6.6$  Hz, 3H);  $^{13}\text{C}$  NMR (150 MHz, Acetone- $\text{d}_6$ )  $\delta$  206.7, 137.5, 137.3, 136.0, 135.9, 134.9, 131.2, 131.0, 129.1, 129.0, 125.1, 97.5, 72.5, 67.7, 65.3, 45.9, 45.6, 42.8, 42.2, 39.6, 38.1, 35.8, 29.4, 28.1, 20.8, 20.5, 19.0, 17.0, 14.2; ESI HRMS Calcd for  $[\text{C}_{35}\text{H}_{50}\text{O}_4\text{Si} + \text{Na}]^+$ : 585.3376, Found: 585.3368.

### 1-Bromo-4-methoxy-3-methylbenzene (F).<sup>1</sup>

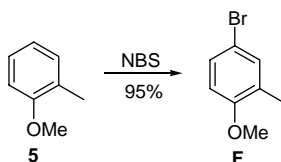

To a stirred solution of 2-methylanisol **5** (3.67 g, 30.0 mmol) in  $\text{CH}_3\text{CN}$  at rt was added NBS (5.87 g, 33.0 mmol). After 1 h, the solvent was removed and the residue was dissolved in ether (100 mL). The organic layer was washed with water (100 mL), brine (20 mL) and dried with anhydrous sodium sulfate. After removal of the solvent *in vacuo*, the residue was recrystallized from hexane/ether to give bromide **F** (5.7 g, 95%) as a white solid: m.p. = 66-68 °C;  $^1\text{H}$  NMR (270 MHz,  $\text{CDCl}_3$ )  $\delta$  7.25 (m, 2H), 6.67 (m, 1H), 3.79 (s, 3H), 2.18 (s, 3H);  $^{13}\text{C}$  NMR (68 MHz,  $\text{CDCl}_3$ )  $\delta$  156.9, 133.2, 129.4, 129.0, 112.4, 111.5, 55.5, 16.2.

### 4-Methoxy-3-methylbenzoic acid (G).<sup>2</sup>

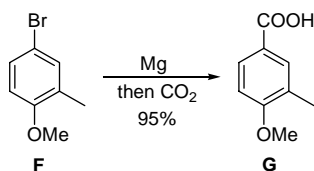

<sup>1</sup> Carreno, M. C.; Ruano, J. L. G.; Sanz, G.; Toledo, M. A.; Urbano, A. *J. Org. Chem.* **1995**, *60*, 5328-5331.

<sup>2</sup> Tietze, L. F.; Stewart, S. G.; Polomska, M. E.; Modi, A.; Zeeck, A. *Chem. Eur. J.* **2004**, *10*, 5233-5242.

To a mixture of magnesium turnings (6.7 g, 0.28 mol), THF (300 mL), 1,2-dibromoethane (0.5 mL) was added a solution of bromide **F** (50 g, 0.25 mol) in THF (100 mL) slowly. The resulting mixture was refluxed for 5 h under argon. Then the Grignard reagent was added to dry ice (~500 g) over 1 h. When the addition was completed, the mixture was warmed to rt and water (500 mL) was added. The solution was acidified with H<sub>2</sub>SO<sub>4</sub> (2M) to pH = 2. The solution was extracted with AcOEt (500 mL x 2). The organic layers were washed with water (200 mL), brine (200 mL) and dried with anhydrous sodium sulfate. After removal of the solvent *in vacuo*, the residue was recrystallized from AcOEt/hexane (1:1) to give acid **G** (39.2 g, 95%) as a white solid: m.p. = 194-196 °C; <sup>1</sup>H NMR (270 MHz, DMSO-d<sub>6</sub>) δ 7.80 (dd, *J* = 8.7, 2.2 Hz, 1H), 7.73 (d, *J* = 2.2 Hz, 1H), 7.02 (d, *J* = 8.7 Hz, 1H), 3.84 (s, 3H), 3.45 (br, 1H), 2.17 (s, 3H); <sup>13</sup>C NMR (68 MHz, DMSO-d<sub>6</sub>) δ 167.8, 161.5, 132.0, 129.8, 126.2, 122.9, 110.4, 56.1, 16.5.

#### 4,5-Dihydro-2-(4-methoxy-3-methylphenyl)-4,4-dimethyloxazole (**H**).<sup>3</sup>

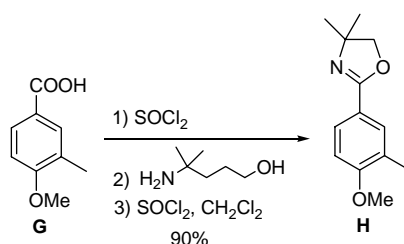

Following the procedure reported by Smith et al., acid **G** (121 g, 0.73 mol) was converted into oxazoline **H** (144 g, 90%): <sup>1</sup>H NMR (600 MHz, CDCl<sub>3</sub>) δ 7.72 (d, *J* = 1.8 Hz, 1H), 7.70 (dd, *J* = 8.4, 1.8 Hz, 1H), 7.76 (d, *J* = 8.4 Hz, 1H), 4.03 (s, 3H), 3.81 (s, 3H), 2.18 (s, 3H), 1.33 (s, 6H); <sup>13</sup>C NMR (150 MHz, CDCl<sub>3</sub>) δ 162.2, 160.3, 130.7, 127.5, 126.8, 120.1, 109.4, 79.1, 67.5, 55.5, 28.6, 16.1.

<sup>3</sup> Schow, S. R.; Bloom J. D.; Thompson, A. S.; Winzenberg, K. N.; Smith, A. B., III. *J. Am. Chem. Soc.* **1986**, 108, 2662-2674.

### 3-Ethenyl-5-methoxy-3,6-dimethyl-1(3*H*)-isobenzofuranone (**I**).

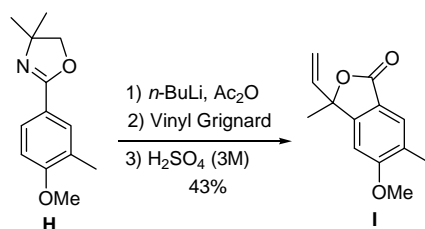

Following the procedure reported by Smith et al., oxazoline **H** was transformed to lactone **I** (43%):  $^1\text{H}$  NMR (600 MHz,  $\text{CDCl}_3$ )  $\delta$  7.56 (s, 1H), 6.67 (s, 1H), 5.99 (dd,  $J = 16.8, 10.8$  Hz, 1H), 5.37 (d,  $J = 17.4$  Hz, 1H), 5.16 (d,  $J = 10.8$  Hz, 1H), 3.90 (s, 3H), 2.22 (s, 3H), 1.68 (s, 3H);  $^{13}\text{C}$  NMR (150 MHz,  $\text{CDCl}_3$ )  $\delta$  169.9, 163.3, 153.8, 138.5, 129.3, 127.2, 117.0, 115.4, 102.0, 85.8, 56.0, 25.4, 16.7.

### Methyl 2-[3-(diphenylphosphinyl)-1-propenyl]-4-methoxy-5-methyl-(*E*)-benzoate (**3**).

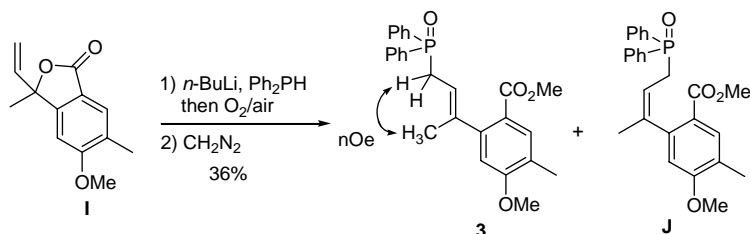

Following the procedure reported by Smith et al., lactone **I** was converted into phosphine oxide **3**<sup>4</sup> (36%):  $^1\text{H}$  NMR (600 MHz,  $\text{CDCl}_3$ )  $\delta$  7.78 (m, 4H), 7.62 (s, 1H), 7.49 (m, 6H), 6.30 (s, 1H), 5.34 (dd,  $J = 14.4, 6.6$  Hz, 1H), 3.75 (s, 6H), 3.25 (dd,  $J = 15.0, 7.8$  Hz, 2H), 2.14 (s, 3H), 1.84 (d,  $J = 1.8$  Hz, 3H);  $^{13}\text{C}$  NMR (150 MHz,  $\text{CDCl}_3$ )  $\delta$  167.3, 160.4, 147.0, 146.9, 143.4, 143.3, 133.6, 132.9, 132.9, 132.0, 131.9, 131.3, 131.2, 128.8, 128.7, 125.3, 120.0, 115.8, 115.8, 111.6, 111.6, 55.6, 51.8, 31.7, 31.2, 19.2, 19.2, 15.8.

<sup>4</sup> In the paper by Smith (ref. 3) the data for phosphine oxides **3** and **J** were switched. This assignment was confirmed by an nOe experiment on phosphine oxide **3**.

**Methyl 2-((5*R*)-9-[(2*R*,4*R*,6*R*,8*R*,9*S*)-4-[(*tert*-butyldiphenylsilyl)-oxy]-8,9-dimethyl-1,7-dioxaspiro[5.5]undecan-2-yl]-1,5,7-trimethyl-1(*E*),3(*E*),7(*E*)-nonatrien-1-yl)-4-methoxy-5-methylbenzoate (23).**

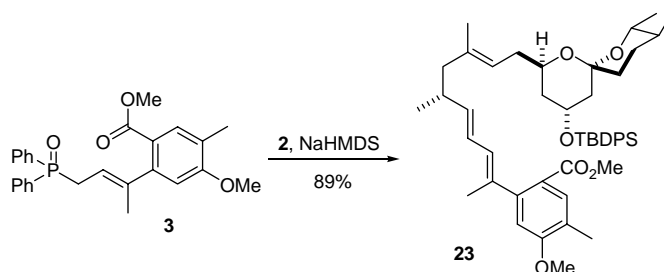

To a solution of phosphine oxide **3** (158 mg, 364  $\mu$ mol) in THF (2 mL) under argon at -78 °C was added sodium hexamethyldisilazide in THF (2 M, 0.16 mL, 320  $\mu$ mol). After 10 min, aldehyde **2** (66 mg, 117  $\mu$ mol) in THF (1 mL) was added dropwise. The resulting mixture was stirred at -78 °C for 20 min before warmed to room temperature and stirred for 1 h. The reaction was quenched with saturated aqueous NH<sub>4</sub>Cl (10 mL). The aqueous layer was extracted with ether (2 x 20 mL), and the combined organic layers were washed with brine, dried over Na<sub>2</sub>SO<sub>4</sub>, filtered, and evaporated. The residue was purified by flash chromatography (1:9 EtOAc/hexanes) on silica gel to give the expected product dien **23** (81 mg, 89%) as a colorless oil:  $[\alpha]_D^{25} +19$  (*c* 0.8, CH<sub>2</sub>Cl<sub>2</sub>); *R<sub>f</sub>* (15 % EtOAc/hexanes) = 0.55; IR (thin film, cm<sup>-1</sup>) 2954, 2928, 1718, 1607, 1560, 1428, 1257, 1152, 1104, 907, 730. 701; <sup>1</sup>H NMR (600 MHz, CDCl<sub>3</sub>)  $\delta$  7.74 (m, 2H), 7.65 (s, 1H), 7.64 (m, 2H), 7.39 (m, 2H), 7.32 (m, 4H), 6.60 (s, 1H), 6.34 (dd, *J* = 15.0, 10.8 Hz, 1H), 5.92 (d, *J* = 10.8 Hz, 1H), 5.66 (dd, *J* = 15.0, 7.2 Hz, 1H), 5.24 (dd, *J* = 7.2, 6.6 Hz, 1H), 4.15 (m, 1H), 4.06 (m, 1H), 3.83 (s, 3H), 3.79 (s, 3H), 3.43 (dq, *J* = 10.8, 6.0 Hz, 1H), 2.43 (m, 1H), 2.19 (s, 3H), 2.18 (m, 2H), 2.08 (ddd, *J* = 13.8, 4.8, 4.8 Hz, 1H), 2.05 (s, 3H), 1.90 (dd, *J* = 12.6, 8.4 Hz, 1H), 1.81 (m, 1H), 1.61 (s, 3H), 1.34-1.59 (m, 7H), 1.25 (m, 3H), 1.19 (d, *J* = 6.0 Hz, 3H), 1.05 (s, 9H), 0.98 (d, *J* = 6.6 Hz, 3H), 0.83 (d, *J* = 6.6 Hz, 3H); <sup>13</sup>C NMR (150 MHz, CDCl<sub>3</sub>)  $\delta$  168.0, 160.4, 147.5, 141.1, 137.5, 136.3, 136.1, 135.1, 134.9, 134.8, 132.9, 129.6, 129.5, 127.7, 127.6, 127.5, 125.1, 124.6, 123.0, 120.8, 111.2, 96.4, 71.3, 66.2, 64.3, 55.7, 51.9, 47.7, 41.8, 38.5, 36.8, 36.7, 35.2, 34.7, 28.1, 27.1, 19.9, 19.8, 19.5, 19.0, 18.3, 16.6, 15.9; ESI HRMS Calcd for [C<sub>49</sub>H<sub>66</sub>O<sub>6</sub>Si + Na]<sup>+</sup>: 801.4526, Found: 801.4517.

**Methyl 2-((5*R*)-9-((2*R*,4*R*,6*R*,8*R*,9*S*)-4-hydroxy-8,9-dimethyl-1,7-dioxaspiro[5.5]undecan-2-yl)-1,5,7-trimethyl-1(*E*),3(*E*),7(*E*)-nonatrien-1-yl)-4-methoxy-5-methylbenzoate (**K**).**

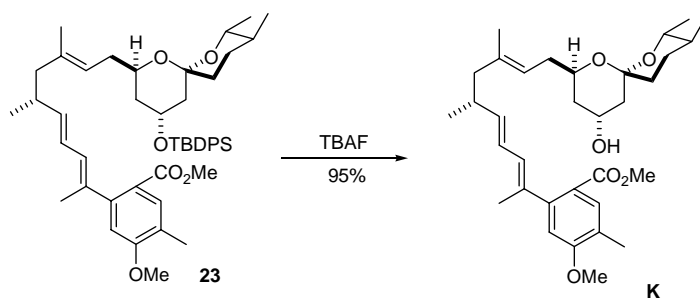

To a solution of TBDPS ether **23** (81 mg, 104  $\mu$ mol) in THF (5 mL) under argon was added TBAF (1 M in THF, 1 mL). The mixture was warmed to 50 °C and stirred for 24 h. The reaction was cooled to room temperature and quenched with saturated aqueous NaHCO<sub>3</sub> (10 mL). The aqueous layer was extracted with ether (2 x 30 mL), and the combined organic layers were washed with brine, dried over Na<sub>2</sub>SO<sub>4</sub>, filtered, and evaporated. The residue was purified by flash chromatography (15:85 EtOAc/hexanes) on silica gel to give the expected product alcohol **K** (53 mg, 95%) as a colorless oil:  $[\alpha]_D^{25} +19$  (*c* 0.95, CH<sub>2</sub>Cl<sub>2</sub>); *R<sub>f</sub>* (30 % EtOAc/hexanes) = 0.58; IR (thin film, cm<sup>-1</sup>) 3510, 2953, 2926, 1721, 1607, 1561, 1500, 1435, 1327, 1556, 1151, 1039, 965; <sup>1</sup>H NMR (600 MHz, CDCl<sub>3</sub>)  $\delta$  7.62 (s, 1H), 6.60 (s, 1H), 6.31 (dd, *J* = 15.0, 10.8 Hz, 1H), 5.89 (d, *J* = 10.8 Hz, 1H), 5.62 (dd, *J* = 15.0, 7.2 Hz, 1H), 5.21 (dd, *J* = 7.2, 6.6 Hz, 1H), 4.19 (d, *J* = 1.8 Hz, 1H), 4.00 (dddd, *J* = 9.6, 9.6, 3.0, 3.0 Hz, 1H), 3.84 (m, 1H), 3.83 (s, 3H), 3.77 (s, 3H), 3.37 (dq, *J* = 9.6, 6.0 Hz, 1H), 2.41 (m, 1H), 2.23 (m, 1H), 2.17 (s, 3H), 2.11 (dd, *J* = 13.2, 6.0 Hz, 1H), 1.90 (dd, *J* = 13.2, 8.4 Hz, 1H), 1.78 (m, 1H), 1.60 (s, 3H), 1.35-1.59 (m, 7H), 1.22 (m, 1H), 1.11 (d, *J* = 6.0 Hz, 1H), 0.96 (d, *J* = 6.6 Hz, 3H), 0.80 (d, *J* = 6.6 Hz, 1H); <sup>13</sup>C NMR (150 MHz, CDCl<sub>3</sub>)  $\delta$  168.0, 160.4, 147.5, 140.9, 137.5, 135.4, 132.9, 127.6, 125.1, 124.7, 122.4, 122.4, 120.7, 111.2, 98.3, 71.1, 65.6, 64.4, 55.7, 51.9, 47.8, 40.4, 38.2, 36.5, 35.9, 35.2, 34.6, 27.5, 20.0, 19.8, 19.0, 18.1, 16.6, 15.9; ESI HRMS Calcd for [C<sub>33</sub>H<sub>49</sub>O<sub>6</sub> + Na]<sup>+</sup>: 563.3349, Found: 563.3340.

**2-[(5*R*)-9-[(2*R*,4*R*,6*R*,8*R*,9*S*)-4-Hydroxy-8,9-dimethyl-1,7-dioxaspiro[5.5]undecan-2-yl]-1,5,7-trimethyl-1(*E*),3(*E*),7(*E*)-nonatrien-1-yl]-4-methoxy-5-methylbenzoic acid (**L**).**

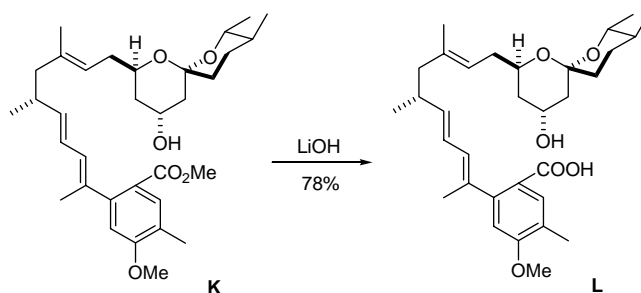

To a solution of ester **K** (53 mg, 98  $\mu\text{mol}$ ) in THF (1 mL) under argon was added methanol (2 mL) and LiOH (1.5 M, 1mL). The mixture was heated to 70 °C and stirred for 24 h. The resulting solution was cooled to room temperature and acidified to PH 2 by using HCl (1 M) solution. The solution was extracted with EtOAc (2 x 50 mL), and the combined organic layers were washed with brine, dried over Na<sub>2</sub>SO<sub>4</sub>, filtered, and evaporated. The residue was purified by flash chromatography (4:6 EtOAc/hexanes) on silica gel to give the expected product acid **L** (40 mg, 78%) as a colorless oil:  $[\alpha]_D^{25} +28$  (*c* 1.3, CH<sub>2</sub>Cl<sub>2</sub>); *R<sub>f</sub>* (40 % EtOAc/hexanes) = 0.37; IR (thin film, cm<sup>-1</sup>) 3478, 3100 (br), 2928, 1686, 1606, 1560, 1446, 1381, 1249, 1154, 1039, 908, 730; <sup>1</sup>H NMR (600 MHz, CDCl<sub>3</sub>)  $\delta$  7.70 (s, 1H), 6.60 (s, 1H), 6.29 (dd, *J* = 15.0, 10.8 Hz, 1H), 5.90 (d, *J* = 10.8 Hz, 1H), 5.57 (dd, *J* = 15.0, 7.8 Hz, 1H), 5.18 (dd, *J* = 7.2, 7.2 Hz, 1H), 4.09 (m, 1H), 3.80 (m, 1H), 3.84 (s, 3H), 3.38 (dq, *J* = 9.0, 6.0 Hz, 1H), 2.44 (m, 1H), 2.24 (m, 1H), 2.18 (s, 3H), 2.06 (s, 3H), 2.05 (m, 1H), 1.96 (dd, *J* = 13.2, 6.6 Hz, 1H), 1.81 (m, 2H), 1.61 (s, 3H), 1.50-1.59 (m, 5H), 1.44 (m, 1H), 1.35 (m, 1H), 1.23 (m, 2H), 1.33 (d, *J* = 6.0 Hz, 3H), 0.99 (d, *J* = 6.6 Hz, 3H), 0.81 (d, *J* = 6.6 Hz, 3H); <sup>13</sup>C NMR (150 MHz, CDCl<sub>3</sub>)  $\delta$  160.4, 147.5, 140.6, 136.9, 135.5, 133.2, 127.6, 124.9, 124.8, 121.8, 120.3, 110.8, 98.1, 72.0, 65.4, 64.3, 64.2, 55.4, 47.7, 39.9, 37.6, 36.3, 35.6, 35.0, 34.6, 30.6, 27.2, 20.6, 19.6, 19.1, 18.8, 17.8, 16.3, 15.6, 13.6; ESI HRMS Calcd for [C<sub>32</sub>H<sub>46</sub>O<sub>6</sub> + Na]<sup>+</sup>: 549.3192, Found: 549.3195.

### 5-*O*-Methylmilbemycin $\beta_3$ (**M**).

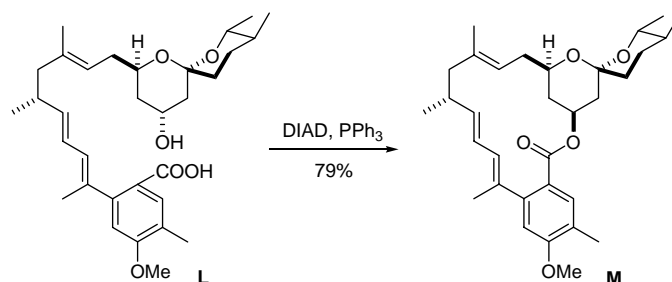

To a solution of hydroxy acid **L** (40 mg, 76  $\mu$ mol) in benzene (20 mL) under argon was added PPh<sub>3</sub> (60 mg, 229  $\mu$ mol). The solution was cooled to 8 °C and diisopropyl azodicarboxylate (30  $\mu$ L, 152  $\mu$ mol) in benzene (2mL) was added dropwise. The resulting mixture was stirred for 2 h and the solvent was removed *in vacuo*. The residue was purified by flash chromatography (1:29 EtOAc/hexanes) on silica gel to give the expected product macro lactone **M** (30 mg, 79%) as a colorless oil:  $[\alpha]_D^{25} +84$  (*c* 1.1, CH<sub>2</sub>Cl<sub>2</sub>); *R<sub>f</sub>* (5 % EtOAc/hexanes) = 0.31; IR (thin film, cm<sup>-1</sup>) 2958, 2927, 1706, 1608, 1501, 1447, 1378, 1257, 1163, 997, 731; <sup>1</sup>H NMR (600 MHz, CDCl<sub>3</sub>)  $\delta$  7.33 (d, *J* = 0.6 Hz, 1H), 6.60 (s, 1H), 6.12 (dd, *J* = 15.0, 10.8 Hz, 1H), 5.70 (d, *J* = 10.8 Hz, 1H), 5.48 (dddd, *J* = 16.2, 11.4, 9.6, 4.8 Hz, 1H), 5.25 (dd, *J* = 15.0, 9.6 Hz, 1H), 4.88 (dd, *J* = 10.8, 1.8 Hz, 1H), 3.80 (s, 3H), 3.67 (m, 1H), 3.27 (dq, *J* = 9.6, 6.0 Hz, 1H), 2.47 (m, 1H), 2.30 (m, 1H), 2.20 (m, 1H), 1.91-2.02 (m, 2H), 1.84 (dd, *J* = 7.2, 6.0 Hz, 1H), 1.64 (m, 1H), 1.62 (s, 3H), 1.44-1.56 (m, 3H), 1.37 (dd, *J* = 12.0, 12.0 Hz, 1H), 1.24 (m, 2H), 1.12 (d, *J* = 6.0 Hz, 3H), 1.01 (d, *J* = 6.6 Hz, 3H), 0.78 (m, 1H); <sup>13</sup>C NMR (150 MHz, CDCl<sub>3</sub>)  $\delta$  169.3, 159.1, 144.0, 140.2, 135.8, 134.8, 131.2, 128.6, 125.4, 125.2, 123.4, 121.5, 109.0, 97.7, 71.2, 68.0, 67.6, 55.4, 48.7, 41.2, 36.6 (2C), 36.3, 35.8, 33.9, 27.8, 21.6, 19.4, 18.2, 17.9, 16.1, 15.7; ESI HRMS Calcd for [C<sub>32</sub>H<sub>44</sub>O<sub>5</sub> + Na]<sup>+</sup>: 531.3086, Found: 531.3089.

### Milbemycin $\beta_3$ (**1**).

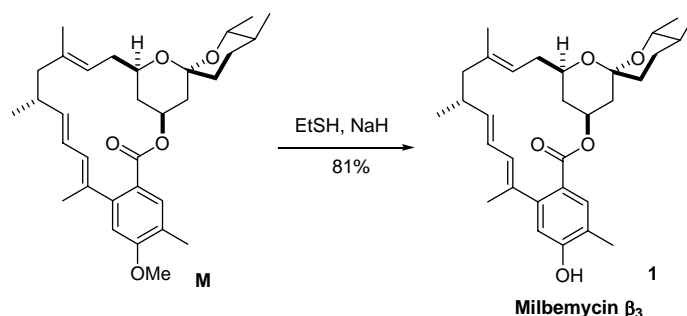

Sodium hydride (400 mg, 60% in mineral oil, 6 mmol) was washed with ether (2 x 3 mL) and dried under argon. DMF (2 mL) was added followed by the addition of 1:1 EtSH-DMF solution to consume all of the NaH. Methyl ether **M** (30 mg, 59  $\mu$ mol) in DMF was added and the mixture heated to reflux for 1 h. The reaction mixture was cooled and quenched with saturated aqueous  $\text{NH}_4\text{Cl}$  (20 mL). The aqueous layer was extracted with ether (2 x 20 mL), and the combined organic layers were washed with brine, dried over  $\text{Na}_2\text{SO}_4$ , filtered, and evaporated. The residue was purified by flash chromatography (1:9 EtOAc/hexanes) on silica gel to give the expected product milbemycin  $\beta_3$  (**1**) (24 mg, 81%) as a light yellow solid, crystallization from  $\text{CH}_2\text{Cl}_2$ -hexane gave 22 mg of crystalline solid: m.p. = 182-184  $^\circ\text{C}$  (lit.<sup>5</sup> 181-183  $^\circ\text{C}$ );  $[\alpha]_D^{25} +99$  ( $c$  0.25, MeOH) [lit. value<sup>5</sup> +102 ( $c$  0.17, MeOH)];  $R_f$  (30 % EtOAc/hexanes) = 0.59; IR (thin film,  $\text{cm}^{-1}$ ) 3378, 2968, 2928, 1682, 1612, 1577, 1449, 1381, 1311, 1282, 1164, 1096, 1054, 998, 909;  $^1\text{H}$  NMR (600 MHz,  $\text{CDCl}_3$ )  $\delta$  7.32 (s, 1H), 6.60 (s, 1H), 6.11 (dd,  $J$  = 15.0, 10.8 Hz, 5.70 (d,  $J$  = 10.8 Hz, 1H), 5.49 (m, 1H), 5.25 (dd,  $J$  = 14.4, 9.0 Hz, 1H), 5.05 (s, 1H), 4.88 (d,  $J$  = 5.6 Hz, 1H), 3.67 (m, 1H), 3.27 (dq,  $J$  = 9.6, 6.6 Hz, 1H), 2.46 (m, 1H), 2.30 (m, 1H), 2.20 (s, 3H), 2.18 (m, 1H), 2.05 (s, 3H), 1.95 (m, 2H), 1.83 (dd,  $J$  = 12.6, 12.6 Hz, 1H), 1.62 (s, 3H), 1.52 (m, 3H), 1.38 (dd,  $J$  = 12.6, 12.0 Hz, 1H), 1.25 (m, 2H), 1.12 (d,  $J$  = 6.6 Hz, 3H), 1.01 (d,  $J$  = 6.6 Hz, 3H), 0.86 (m, 1H), 0.81 (d,  $J$  = 6.6 Hz, 3H), 0.76 (m, 1H);  $^{13}\text{C}$  NMR (150 MHz,  $\text{CDCl}_3$ )  $\delta$  169.4, 155.3, 144.1, 140.3, 135.8,

<sup>5</sup> Barrett, A. G. M.; Carr, R. A. E.; Attwood, S. V.; Richardson, G.; Walshe, N. D. A. *J. Org. Chem.* **1986**, *51*, 4840-4856.

134.0, 131.9, 128.8, 125.4, 124.2, 122.2, 121.4, 114.1, 97.7, 71.2, 68.1, 67.6, 48.7, 41.2, 36.6 (2C), 36.3, 35.8, 33.9, 27.8, 21.6, 19.4, 18.0, 17.9, 16.1, 15.2; ESI HRMS Calcd for  $[\text{C}_{31}\text{H}_{42}\text{O}_5 + \text{Na}]^+$ : 517.2930, Found: 517.2922.

# STANDARD PROTON PARAMETERS

Archive directory: /export/home/vnmr1/vnmrsys/data  
 Sample directory:  
 File: PROTON

Pulse Sequence: s2pu1

Solvent: CDCl3  
 Temp: 28.0 C / 301.1 K  
 INOVA-600 "inova600"

Relax. delay 1.000 sec  
 Pulse 26.9 degrees

Acq. time 1.892 sec  
 Width 9594.6 Hz

16 repetitions

OBSERVE H1, 599.6670139 MHz

DATA PROCESSING

Line broadening 0.2 Hz

FT size 65536

Total time 0 min, 46 sec

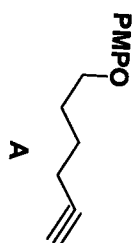

S 33

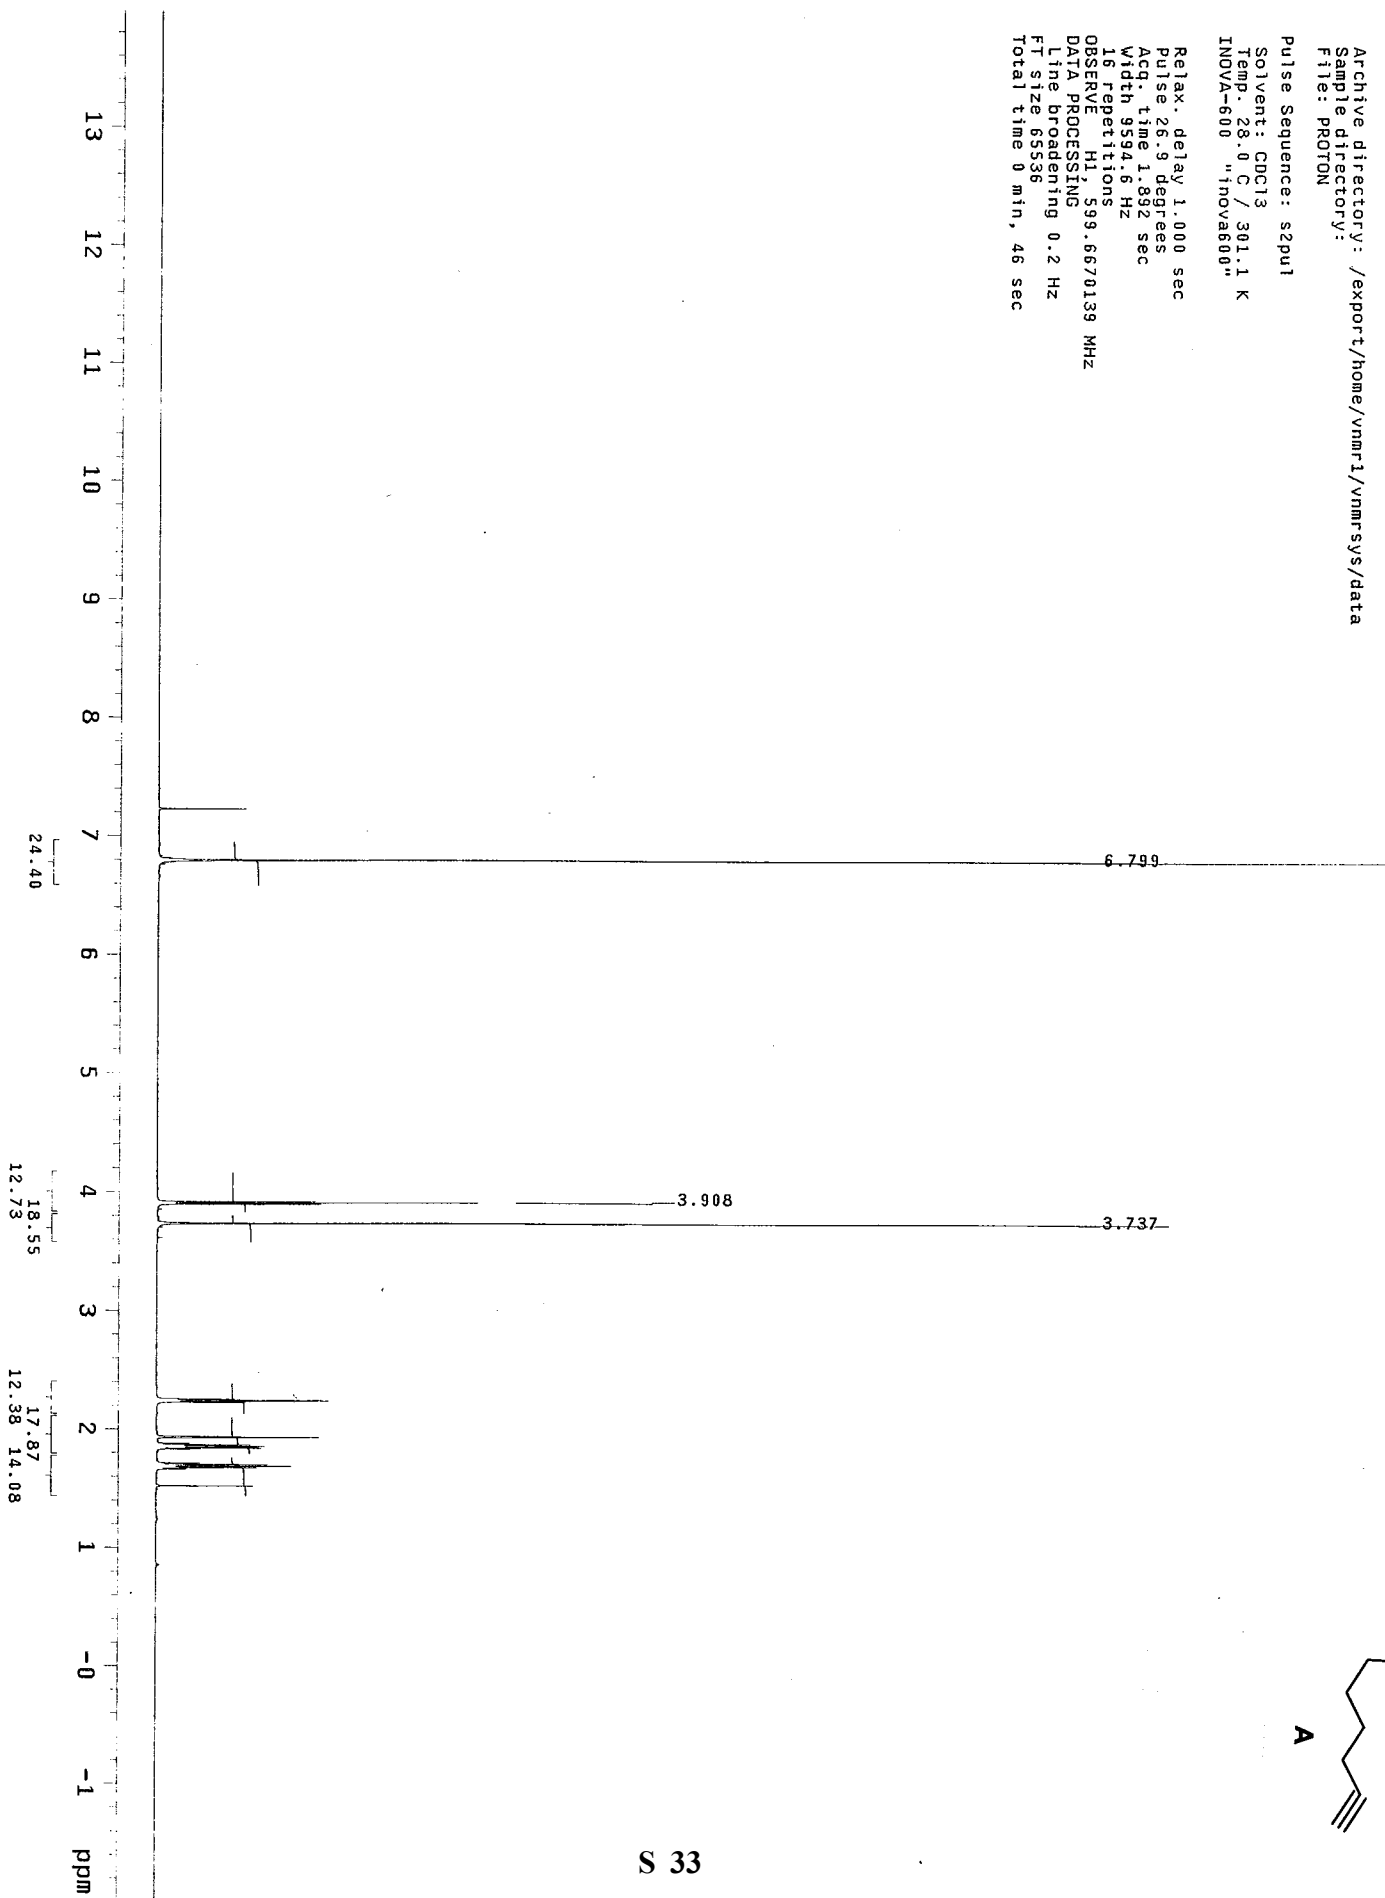

STANDARD CARBON PARAMETERS

Pulse Sequence: s2pu1

Solvent: CDCl3

Temp. 28.0 C / 301.1 K

User: 1-14-87

INOVA-600 "inova600"

Relax. delay 1.000 sec

Pulse 36.5 degrees

Acq. time 1.300 sec

Width 38004.8 Hz

144 repetitions

OBSERVE C13, 150.7863509 MHz

DECOUPLE H1, 599.6700024 MHz

Power 40 dB

continuously on

WALTZ-16 modulated

DATA PROCESSING

Line broadening 0.5 Hz

FT size 151072

Total time 9 min, 51 sec

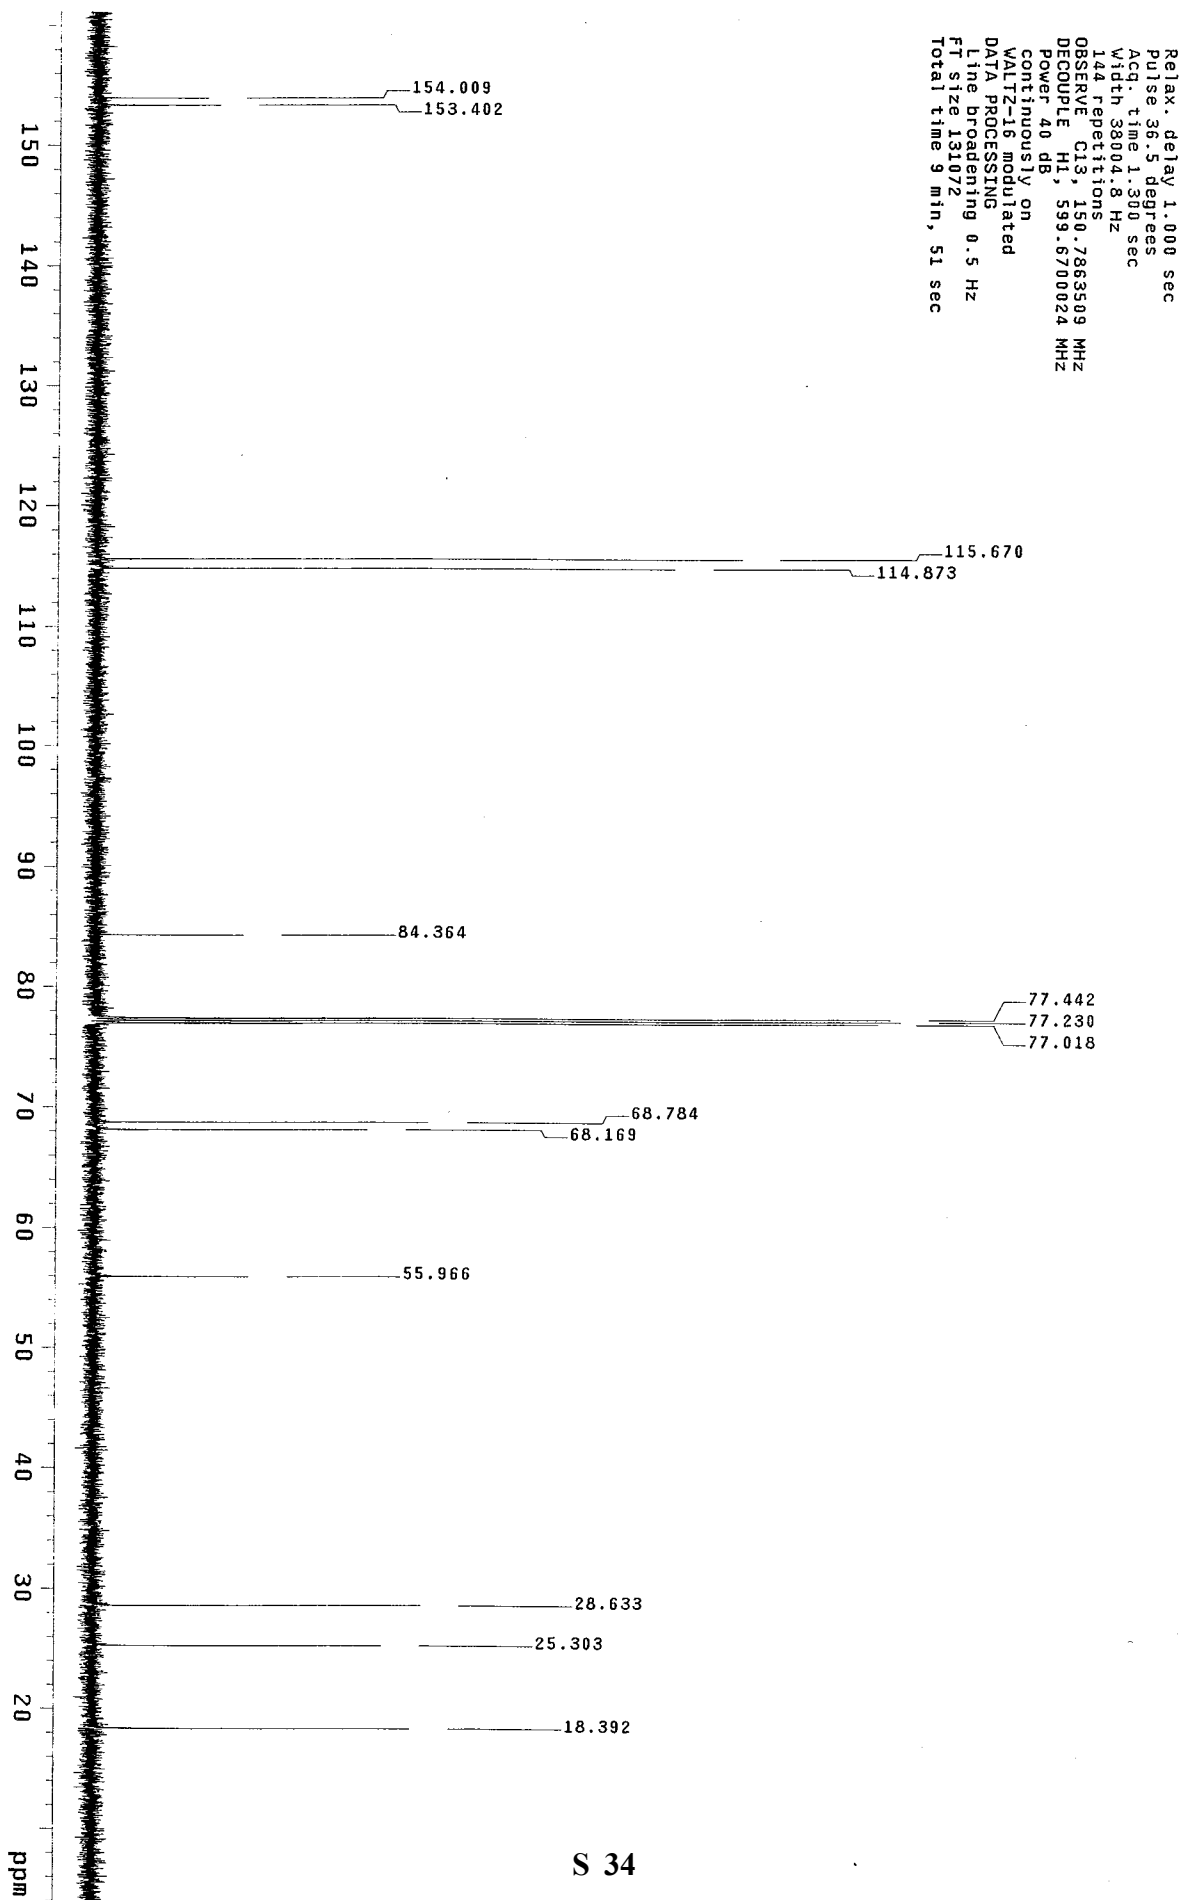

S 34

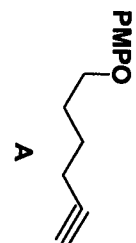

# STANDARD PROTON PARAMETERS

Archive directory: /export/home/vnmr1/vnmrsys/data  
Sample directory:  
File: PROTON

Pulse Sequence: s2pu1

Solvent: CDCl3  
Temp: 28.0 C / 301.1 K  
INNOVA-600 "Inova600"

Relax. delay 1.000 sec  
Pulse 26.9 degrees

Acq. time 1.892 sec  
Width 9594.6 Hz

16 repetitions

OBSERVE H1, 599.6669834 MHz

DATA PROCESSING  
line broadening 0.2 Hz

FT size 65536  
Total time 0 min, 46 sec

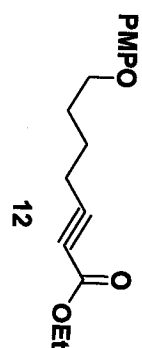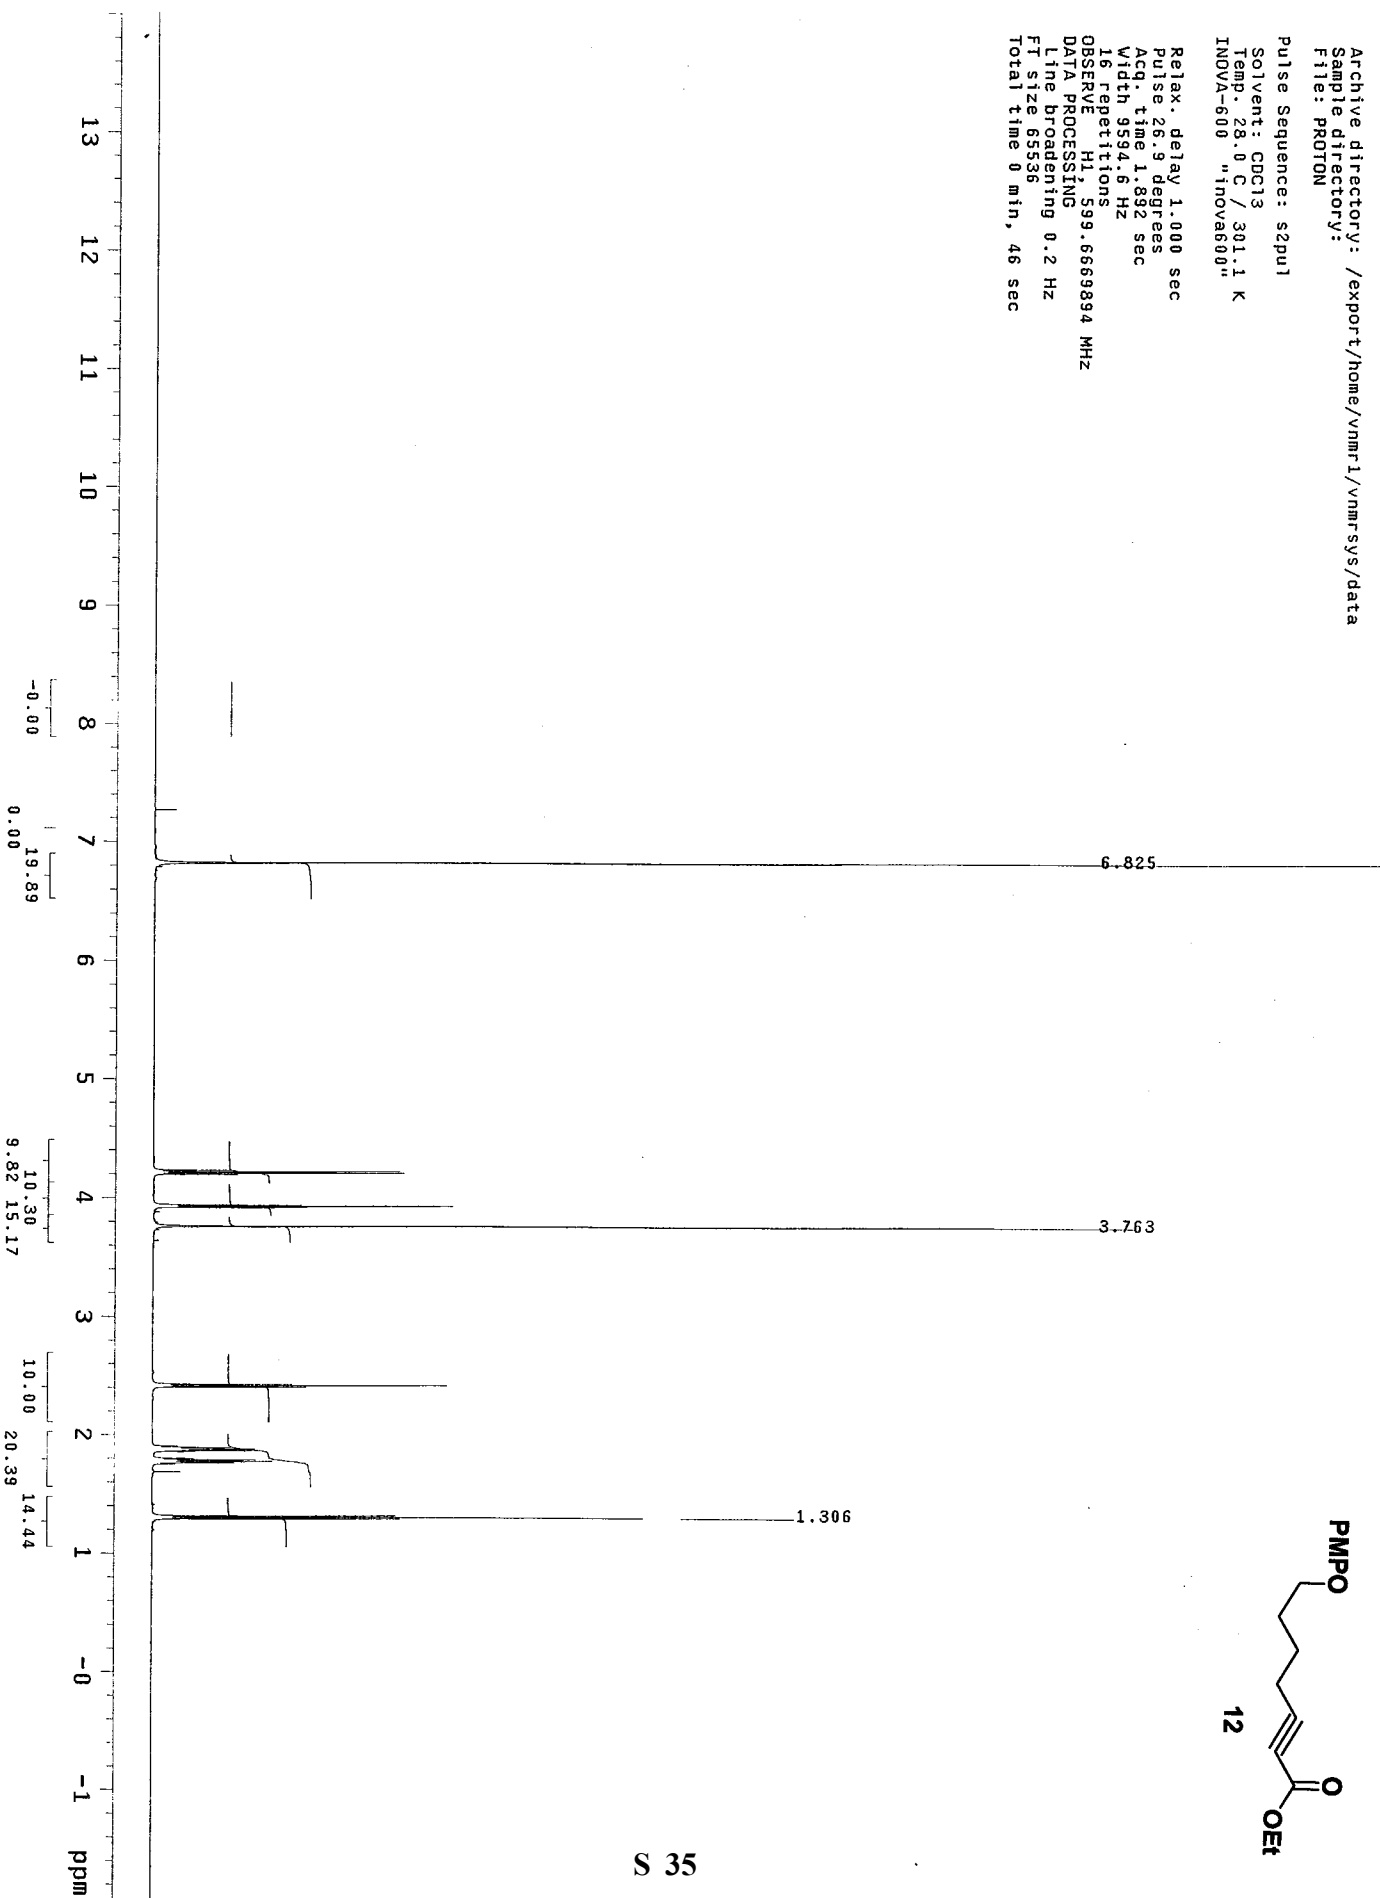

# STANDARD CARBON PARAMETERS

Pulse Sequence: s2pu1

Solvent: CDCl3

Temp: 28.0 C / 301.1 K

User: 1-14-87

INNOVA-600 "innova600"

Relax. delay 1.000 sec

Pulse 36.5 degrees

Acq. time 1.300 sec

Width 38004.8 Hz

328 repetitions

OBSERVE C13, 150.7863607 MHz

DECOUPLE H1, 599.6700024 MHz

Power 40 dB

continuously on

WALTZ-16 modulated

DATA PROCESSING

Line broadening 0.5 Hz

FT size 131072

Total time 6 hr, 24 min, 53 sec

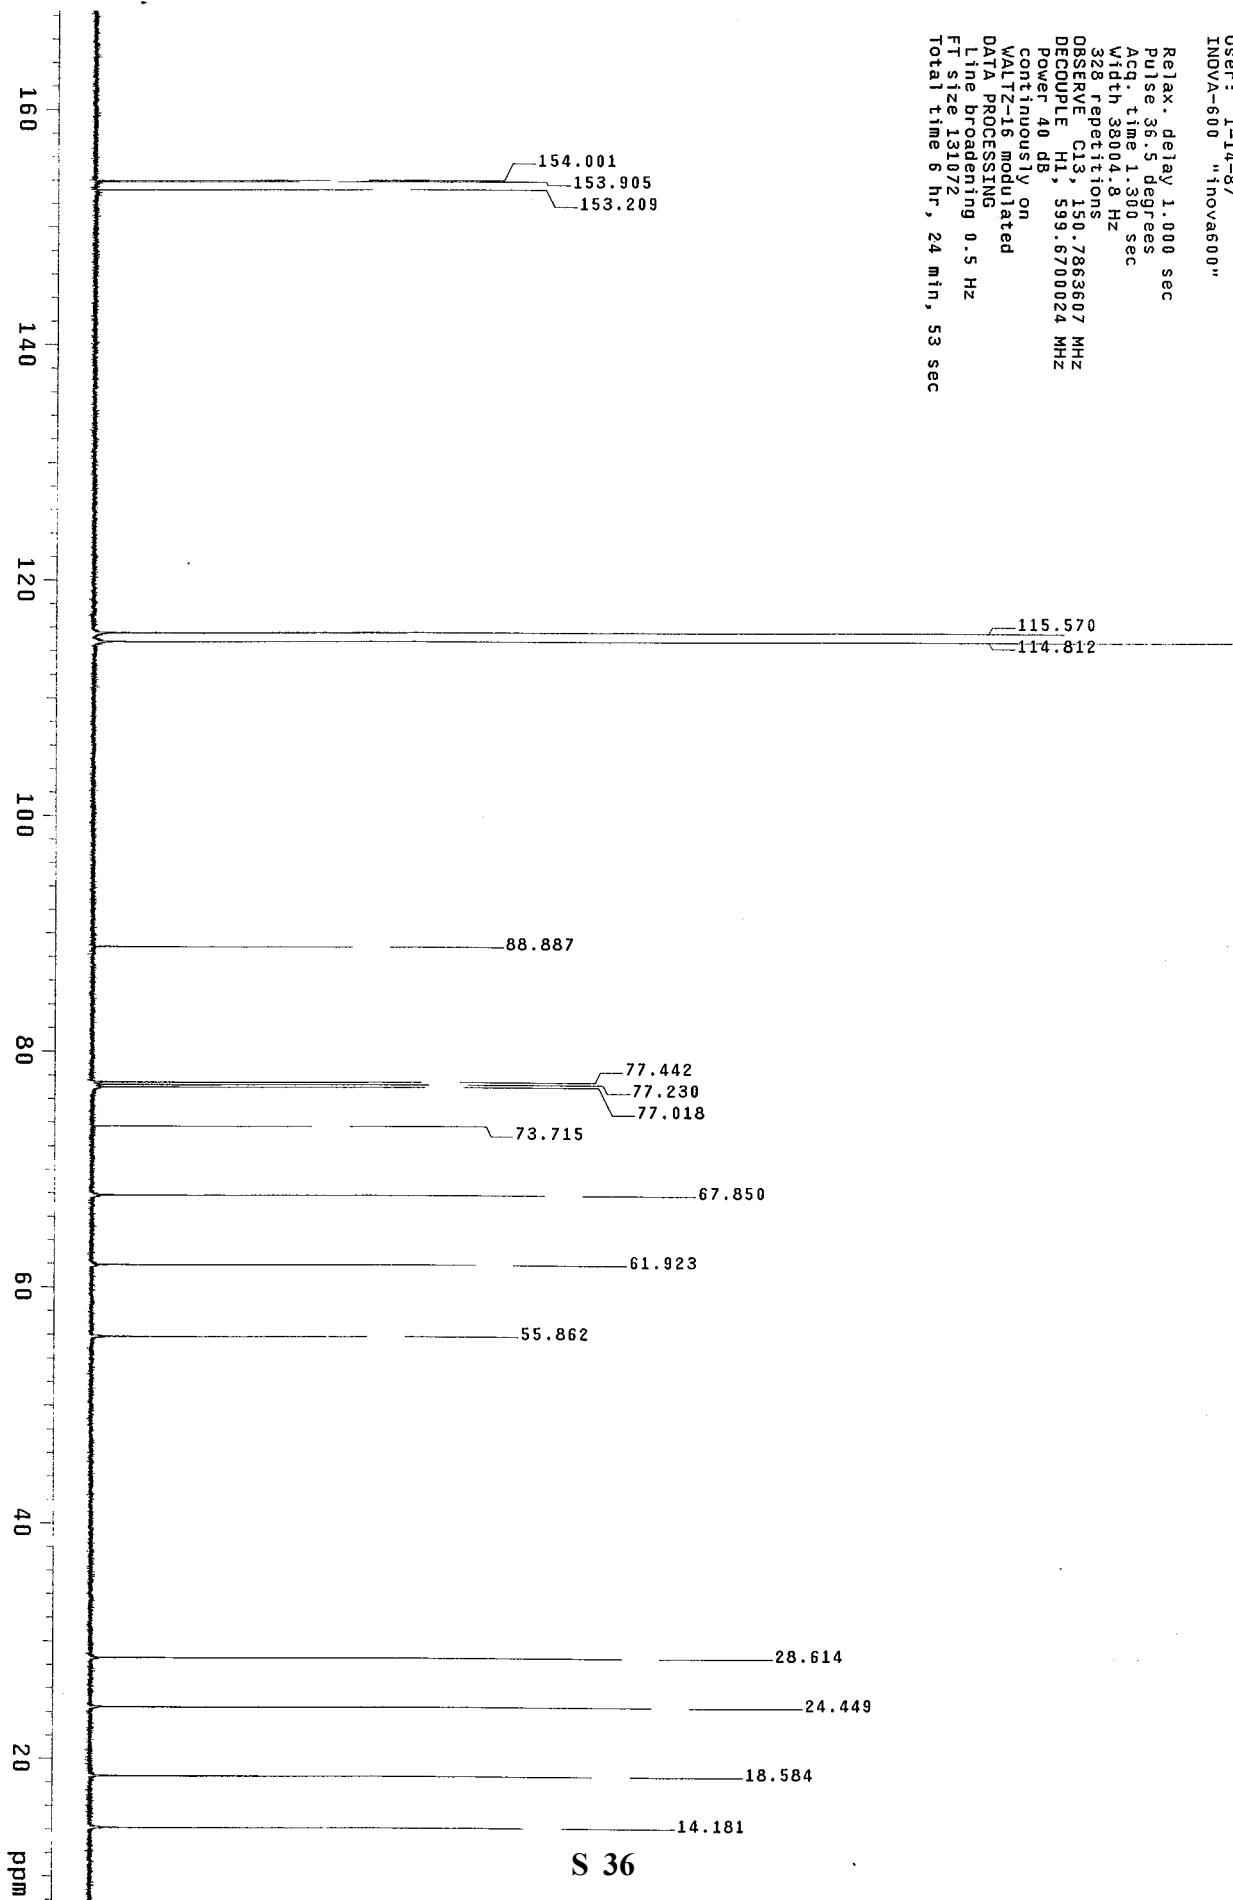

S 36

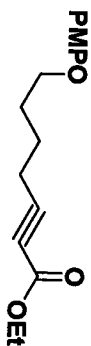

STANDARD PROTON PARAMETERS

Archive directory: /export/home/vnmr1/vnmrSYS/data  
Sample directory:  
File: PROTON

Pulse Sequence: s2pu1

Solvent: CDCl3  
Temp: 28.0 C / 301.1 K  
INNOVA-600 "Inova600"

Relax. delay 1.000 sec  
Pulse 26.9 degrees

Acq. time 1.892 sec  
Width 9594.6 Hz

16 repetitions

OBSERVE H1, 599.6669838 MHz  
DATA PROCESSING

line broadening 0.2 Hz  
FT size 65536

Total time 0 min, 46 sec

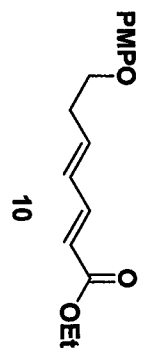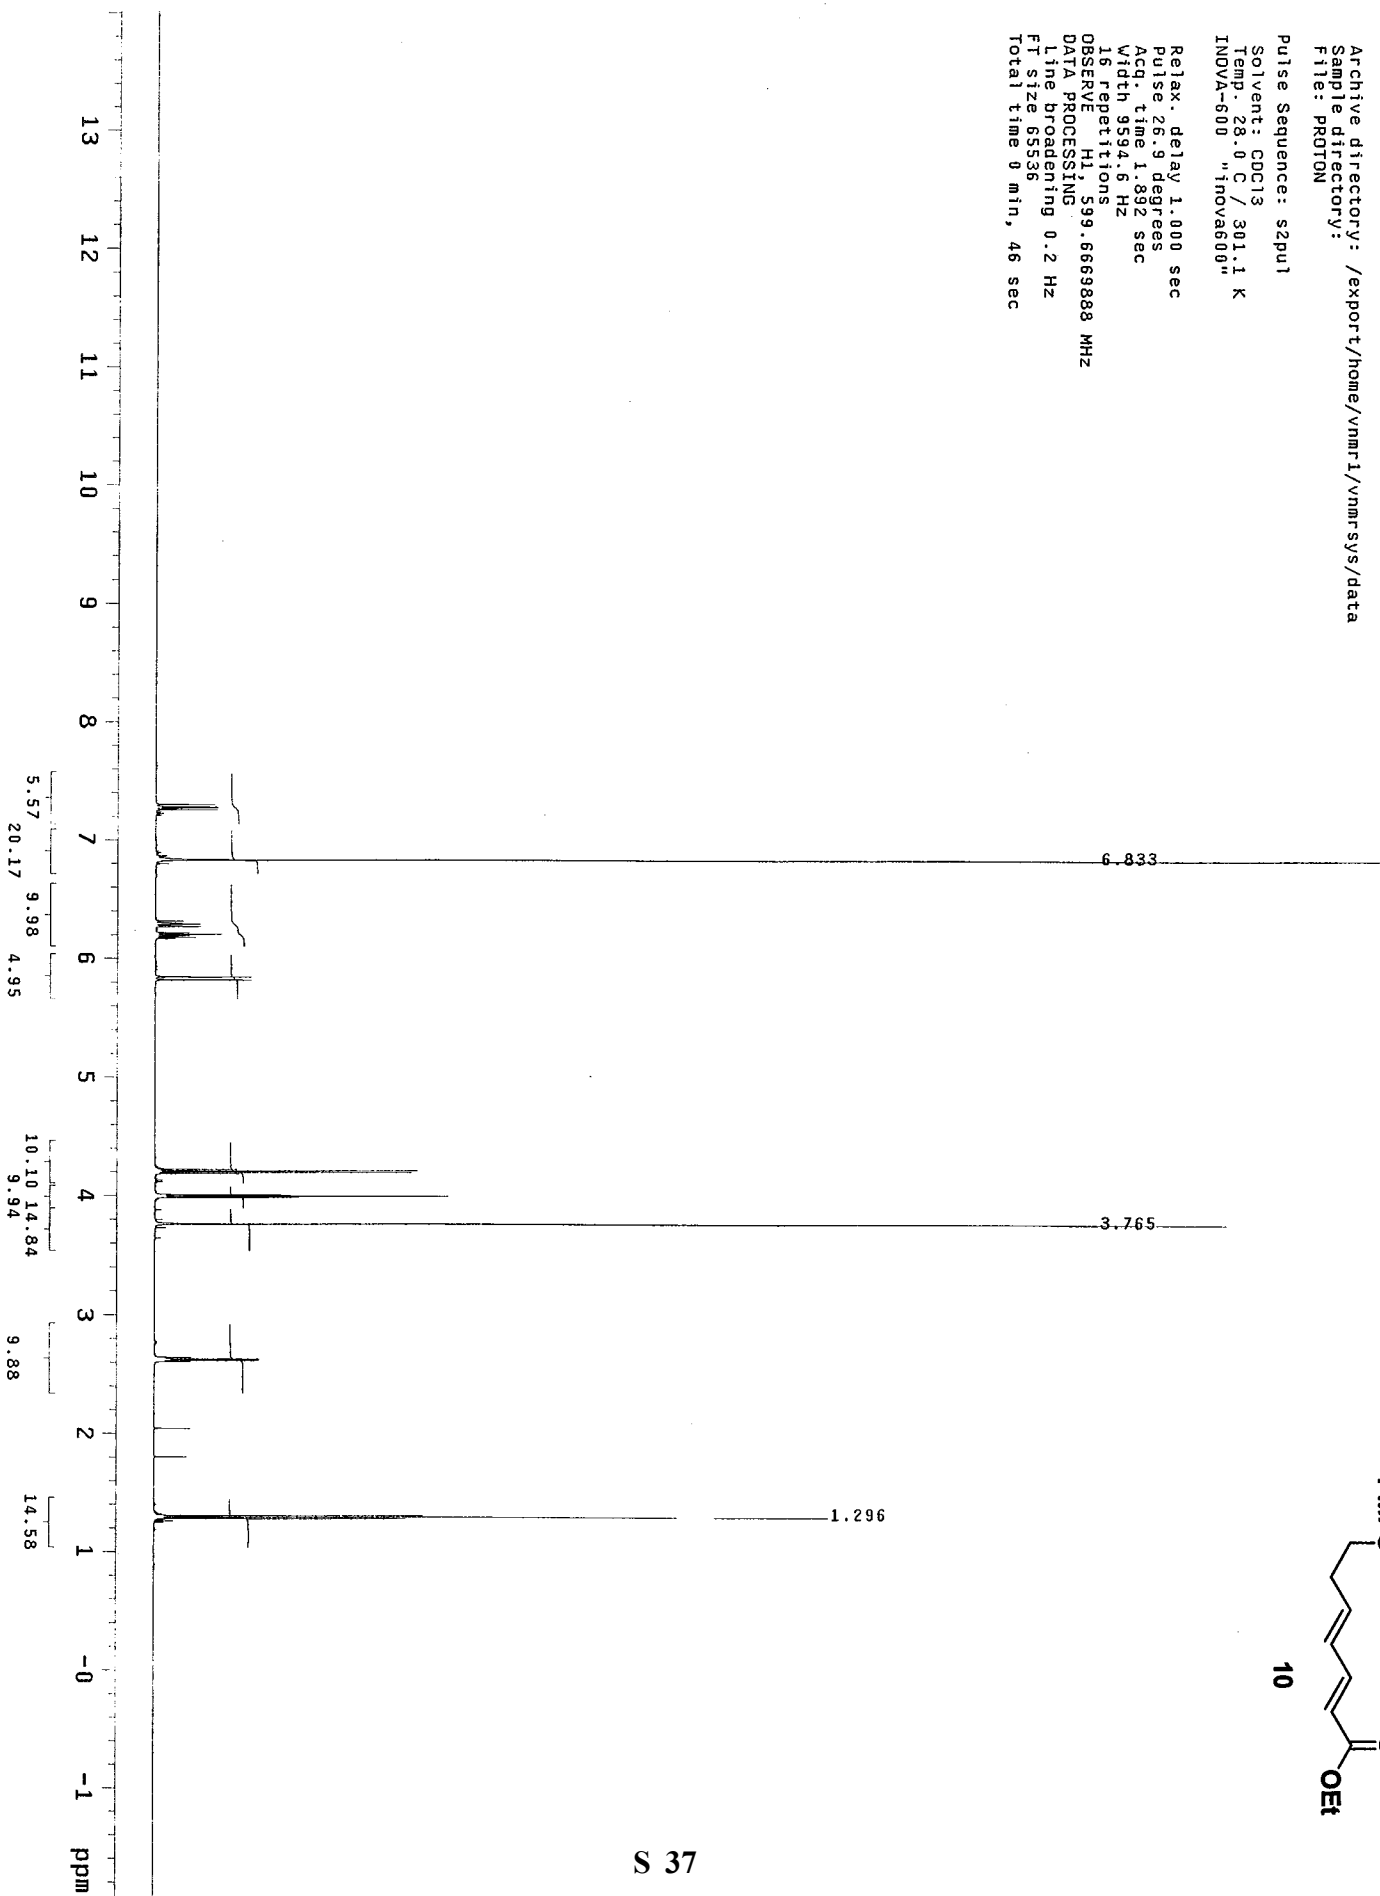

STANDARD CARBON PARAMETERS

Pulse Sequence: szpu1

Solvent: CDCl<sub>3</sub>

Temp: 28.0 C / 301.1 K

User: 1-14-87

INNOVA-600 "innova600"

Relax. delay 1.000 sec

Pulse 36.5 degrees

Acq. time 1.300 sec

Width 38004.8 Hz

1048 repetitions

OBSERVE C13, 150.7663607 MHz

DECOUPLE H1, 599.6700024 MHz

Power 40 dB

continuously on

WALTZ-16 modulated

DATA PROCESSING

Line broadening 0.5 Hz

FT size 131072

Total time 64 hr, 8 min, 57 sec

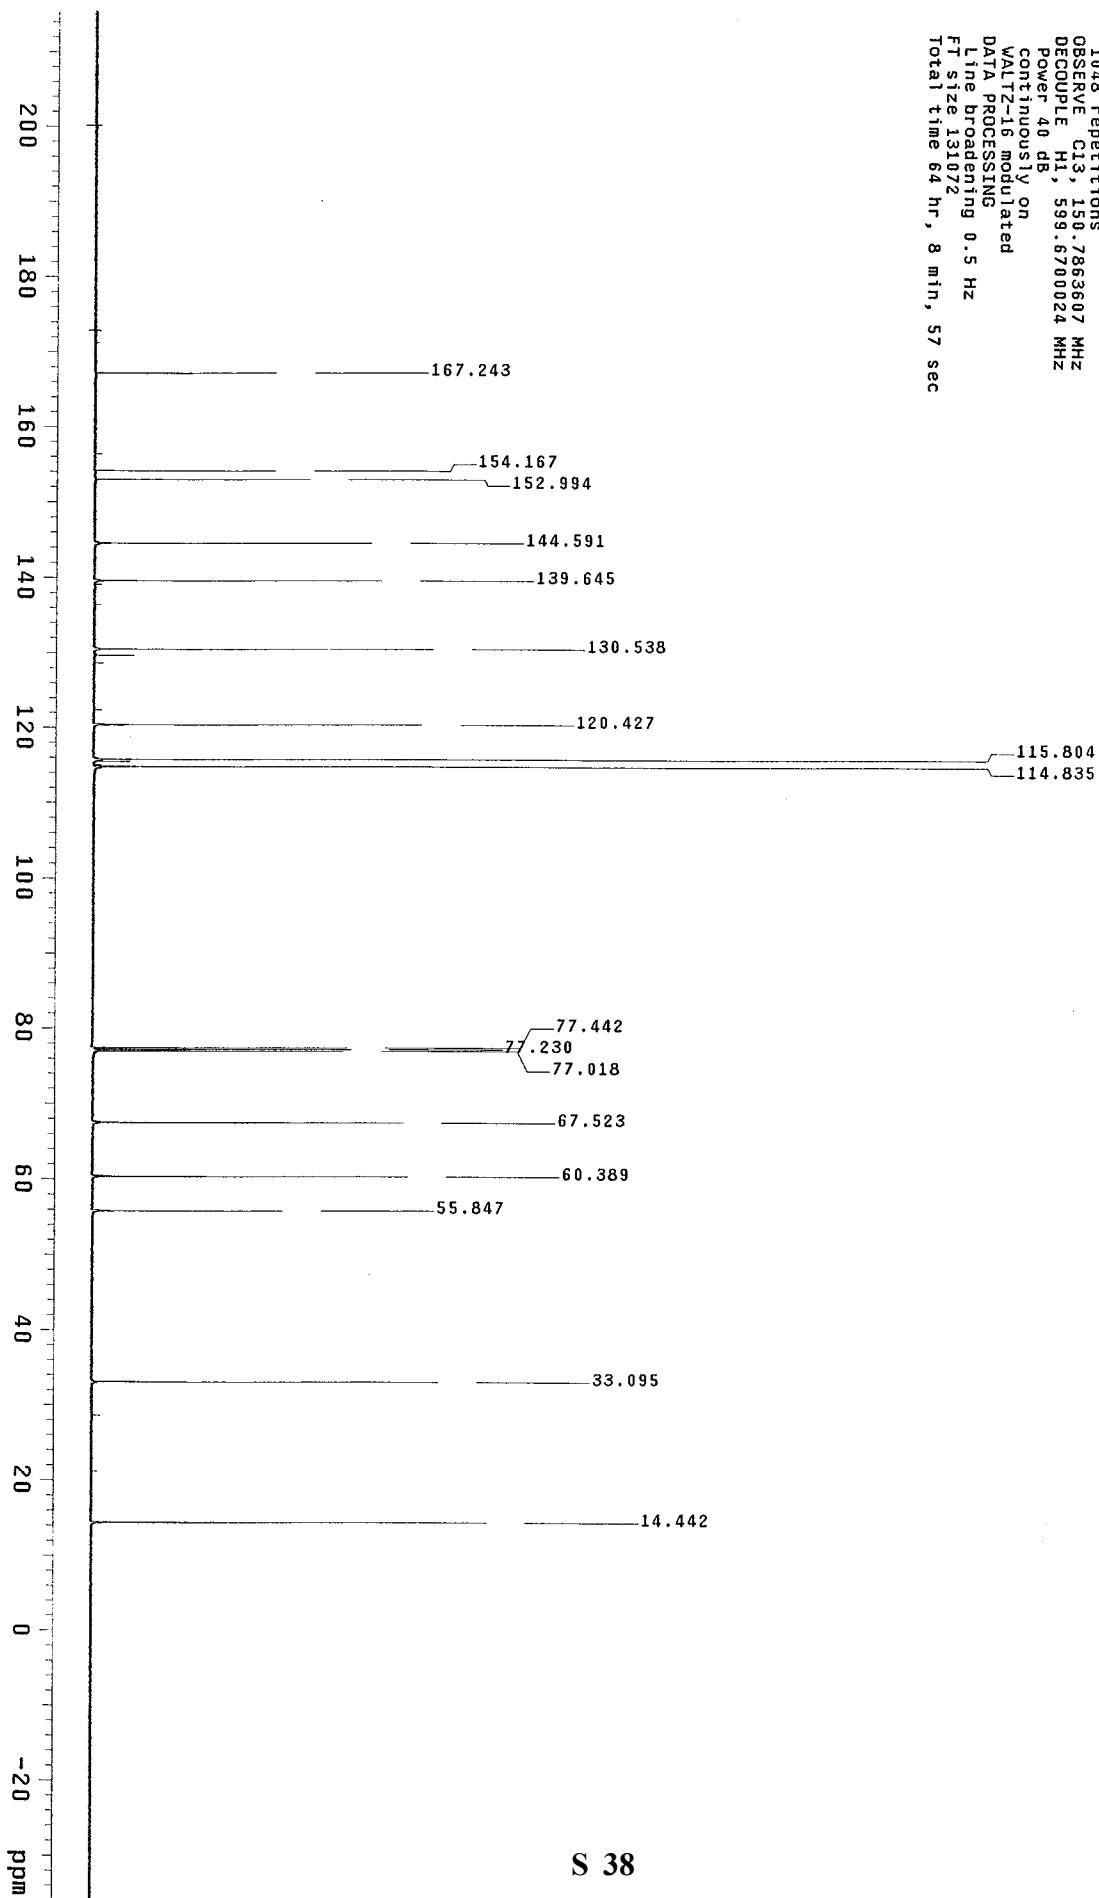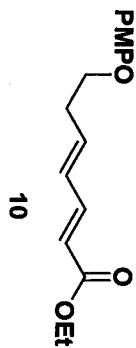

# STANDARD PROTON PARAMETERS

Archive directory: /export/home/vnmr1/vnmrSYS/data  
Sample directory:  
File: PROTON

Pulse Sequence: s2pu1

Solvent: CDCl3  
Temp: 28.0 C / 301.1 K  
INNOVA-600 "Innova600"

Relax. delay 1.000 sec  
Pulse 26.9 degrees

Acq. time 1.892 sec  
Width 9594.6 Hz

16 repetitions

OBSERVE H1, 599.6669897 MHz

DATA PROCESSING

Line broadening 0.2 Hz

FT size 65536

Total time 0 min, 46 sec

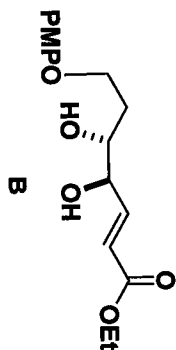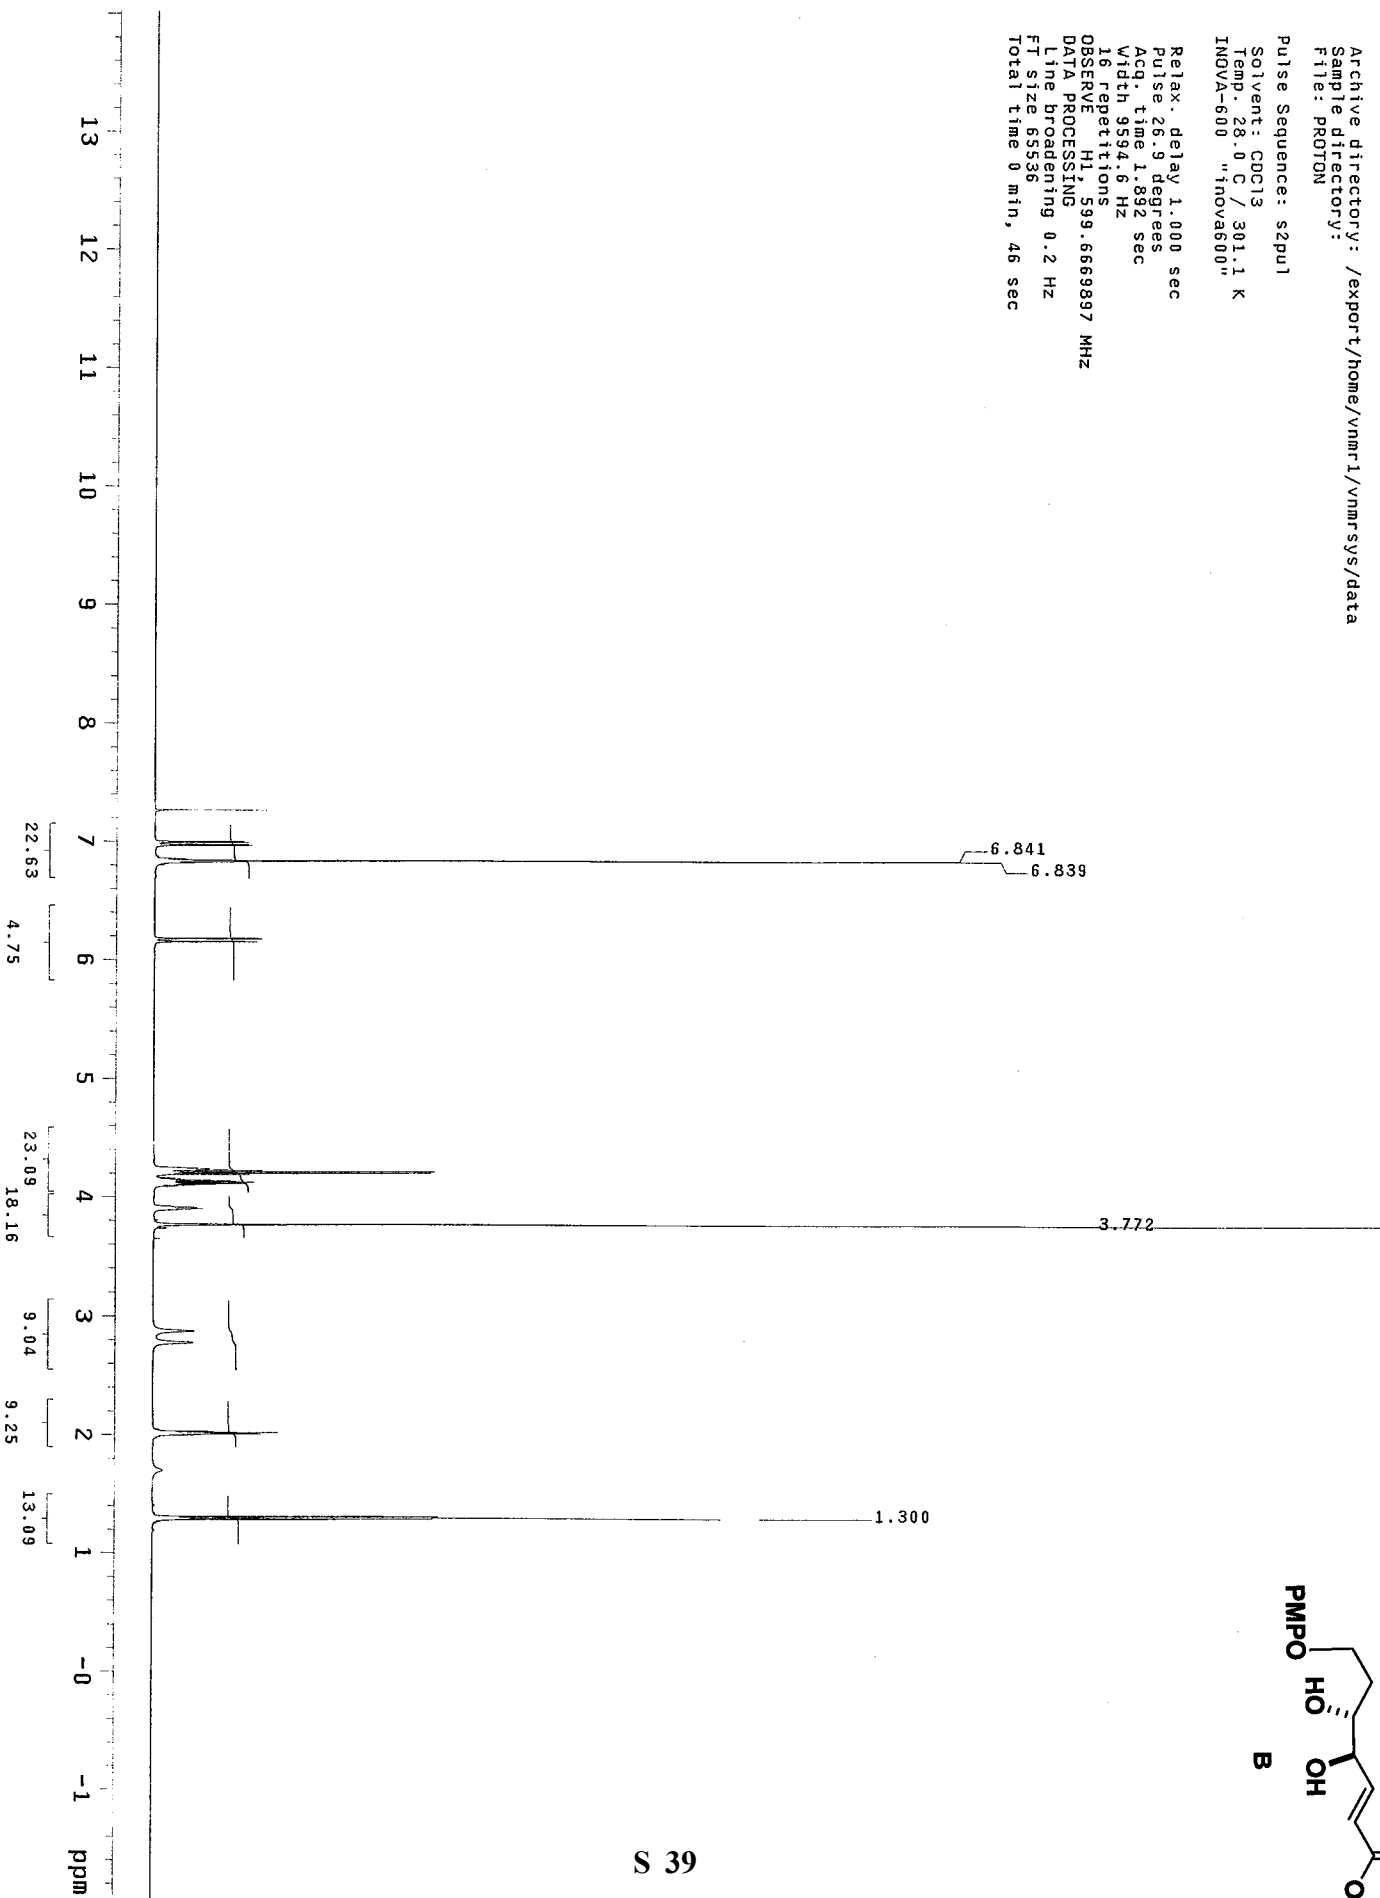

STANDARD CARBON PARAMETERS

Pulse Sequence: szpul

Solvent: CDC13

Temp: 28.0 C / 301.1 K

User: 1-14-87

INOV4-600 "inov4600"

Relax. delay 1.000 sec

Pulse 36.5 degrees

Acq. time 1.300 sec

Width 38004.8 Hz

6592 repetitions

OBSERVE C13, 150.7863514 MHz

DECOUPLE H1, 599.6700024 MHz

Power 40 dB

continuously on

WALTZ-16 modulated

DATA PROCESSING

Line broadening 0.5 Hz

Ft size 131072

Total time 641 hr, 29 min, 32 sec

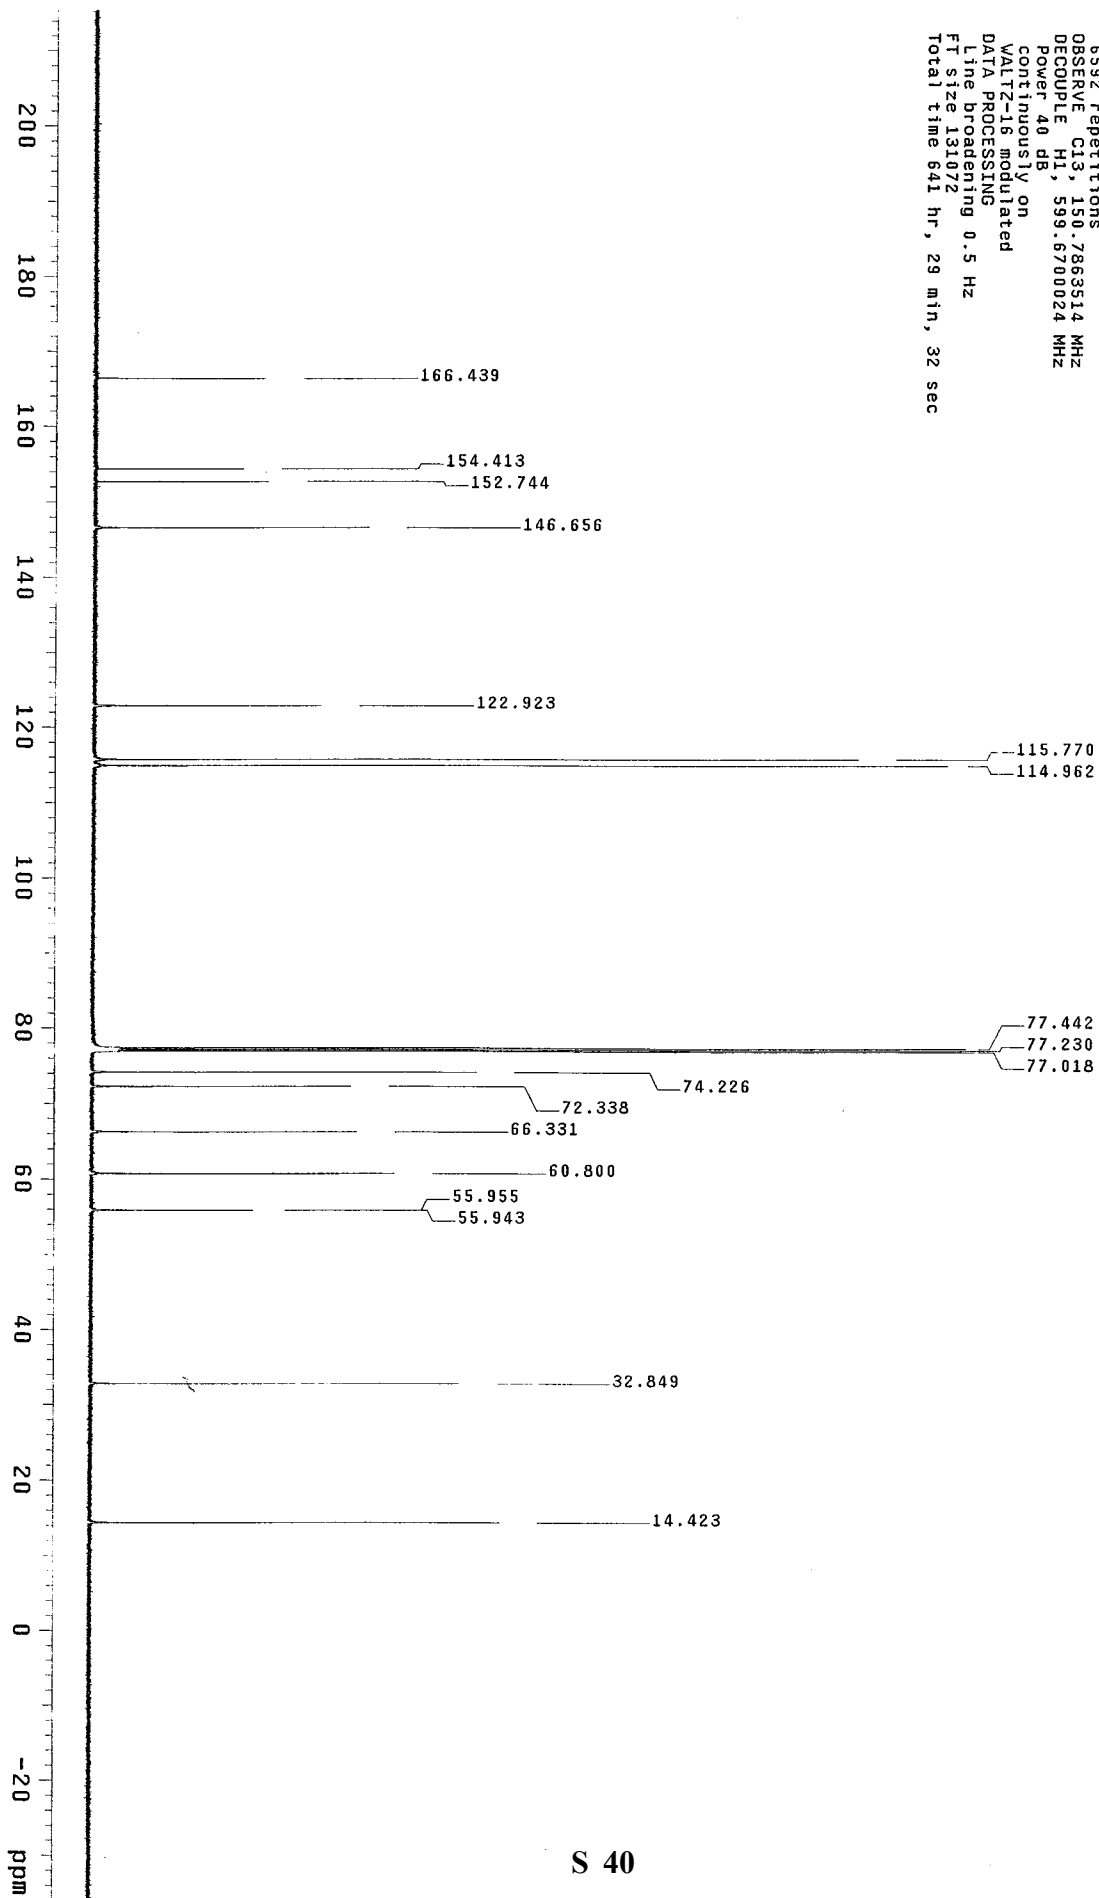

# STANDARD PROTON PARAMETERS

Archive directory: /export/home/vnmr1/vnmrsys/data  
Sample directory:  
File: PROTON

Pulse Sequence: s2pu1

Solvent: CDCl3  
Temp: 28.0 C / 301.1 K  
INNOVA-600 "Innova600"

Relax. delay 1.000 sec  
Pulse 26.9 degrees

Acq. time 1.892 sec  
Width 9594.6 Hz

16 repetitions

OBSERVE H1, 599.6669835 MHz

DATA PROCESSING

line broadening 0.2 Hz

FT size 65536

Total time 0 min, 46 sec

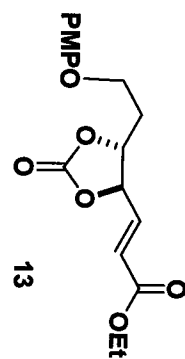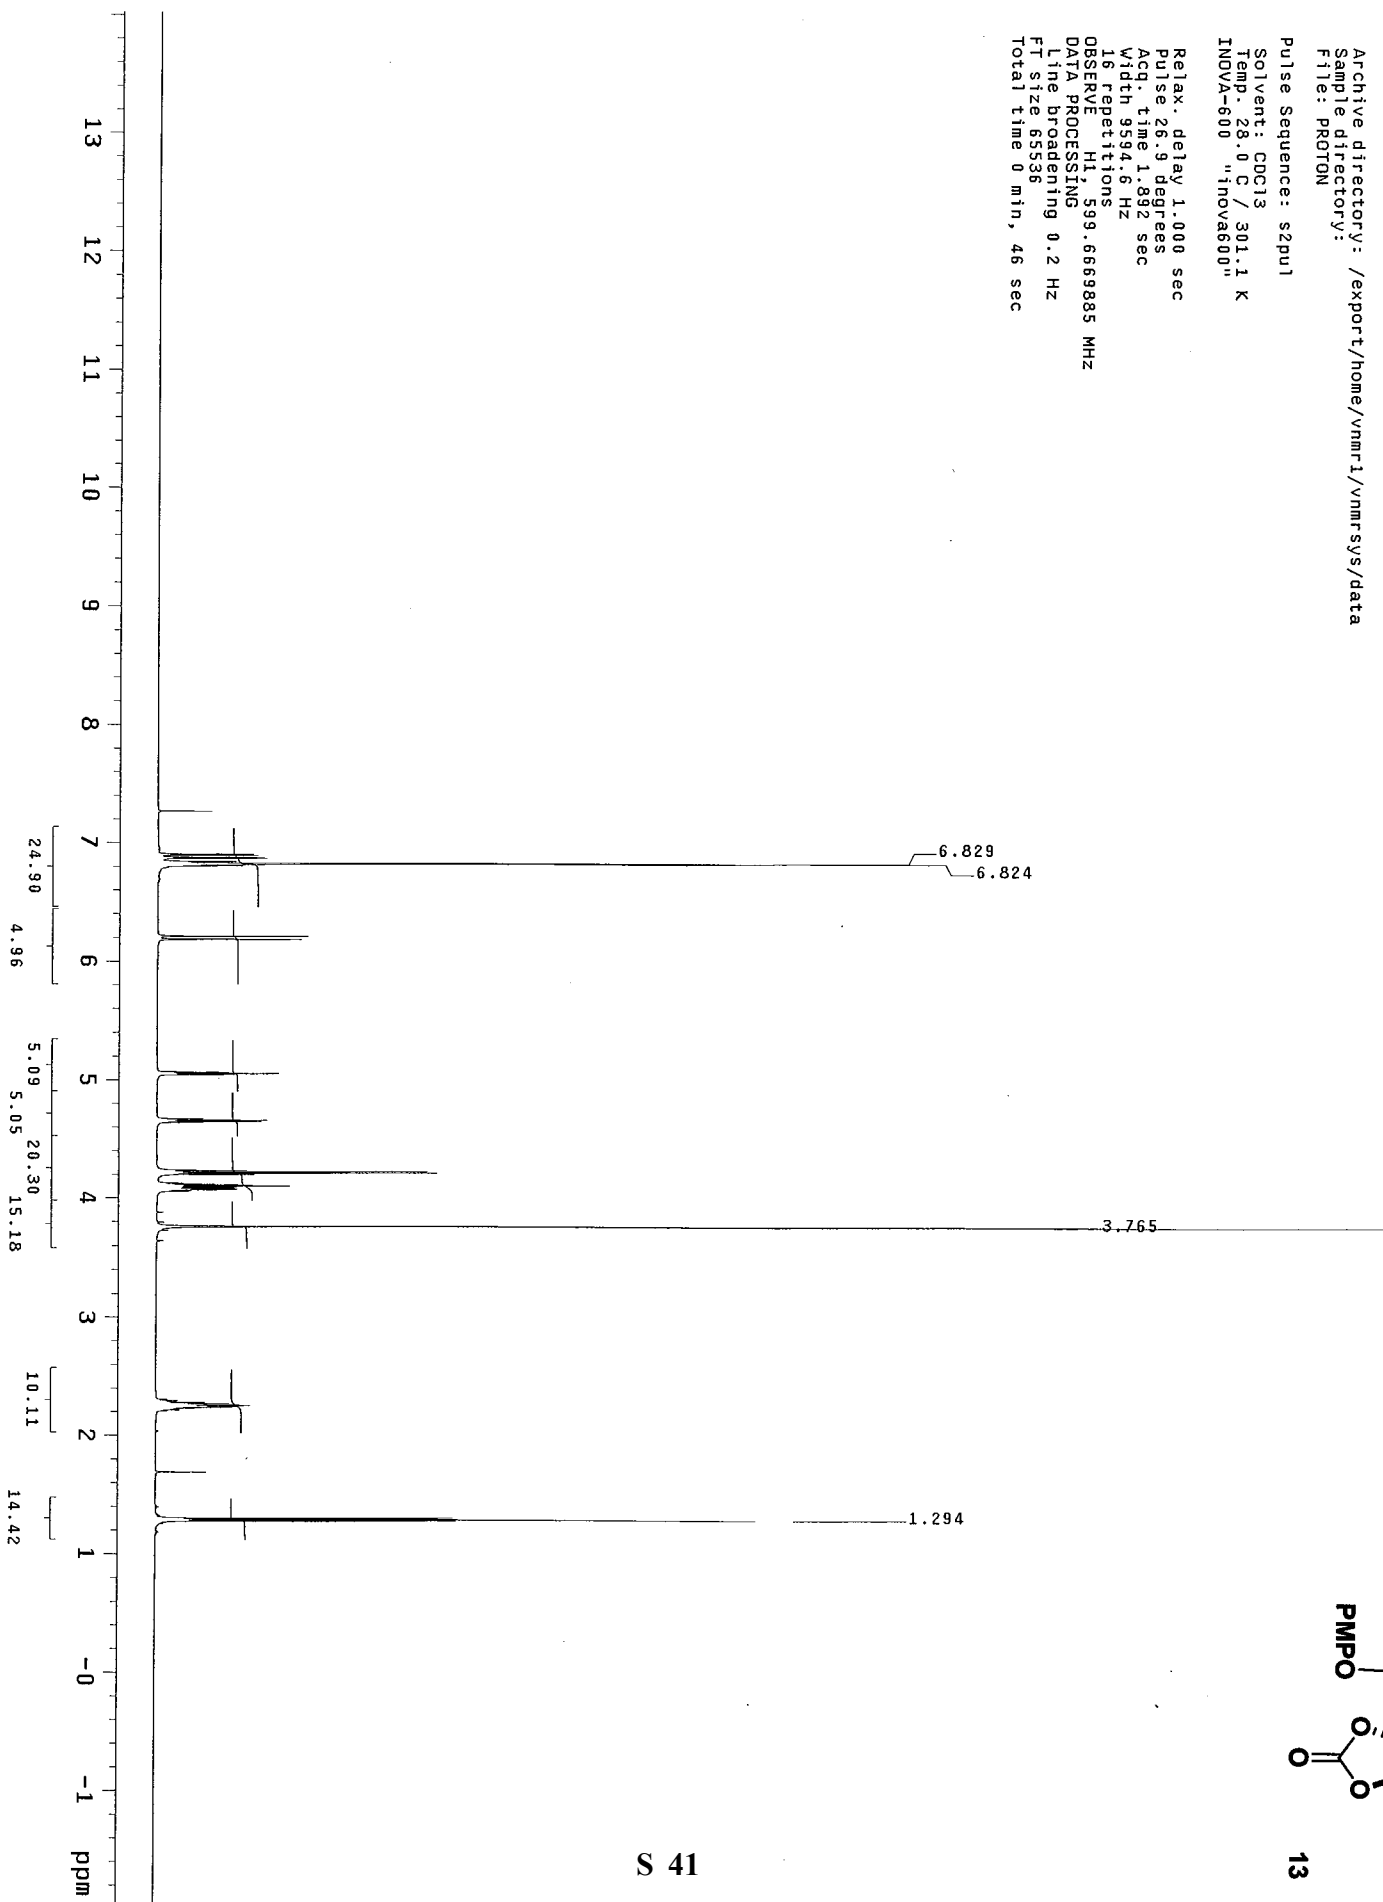

STANDARD CARBON PARAMETERS

Pulse Sequence: szpu1

Solvent: CDCl3

Temp: 28.0 C / 301.1 K

User: 1-14-87

INOVA-600 "Inova600"

Relax. delay 1.000 sec

Pulse 36.5 degrees

Acq. time 1.300 sec

Width 38004.8 Hz

1848 repetitions

OBSERVE C13, 150.7863590 MHz

DECOUPLE H1, 599.6700024 MHz

Power 40 dB

continuously on

WALTZ-16 modulated

DATA PROCESSING

Line broadening 0.5 Hz

Fit size 131072

Total time 6 hr, 24 min, 53 sec

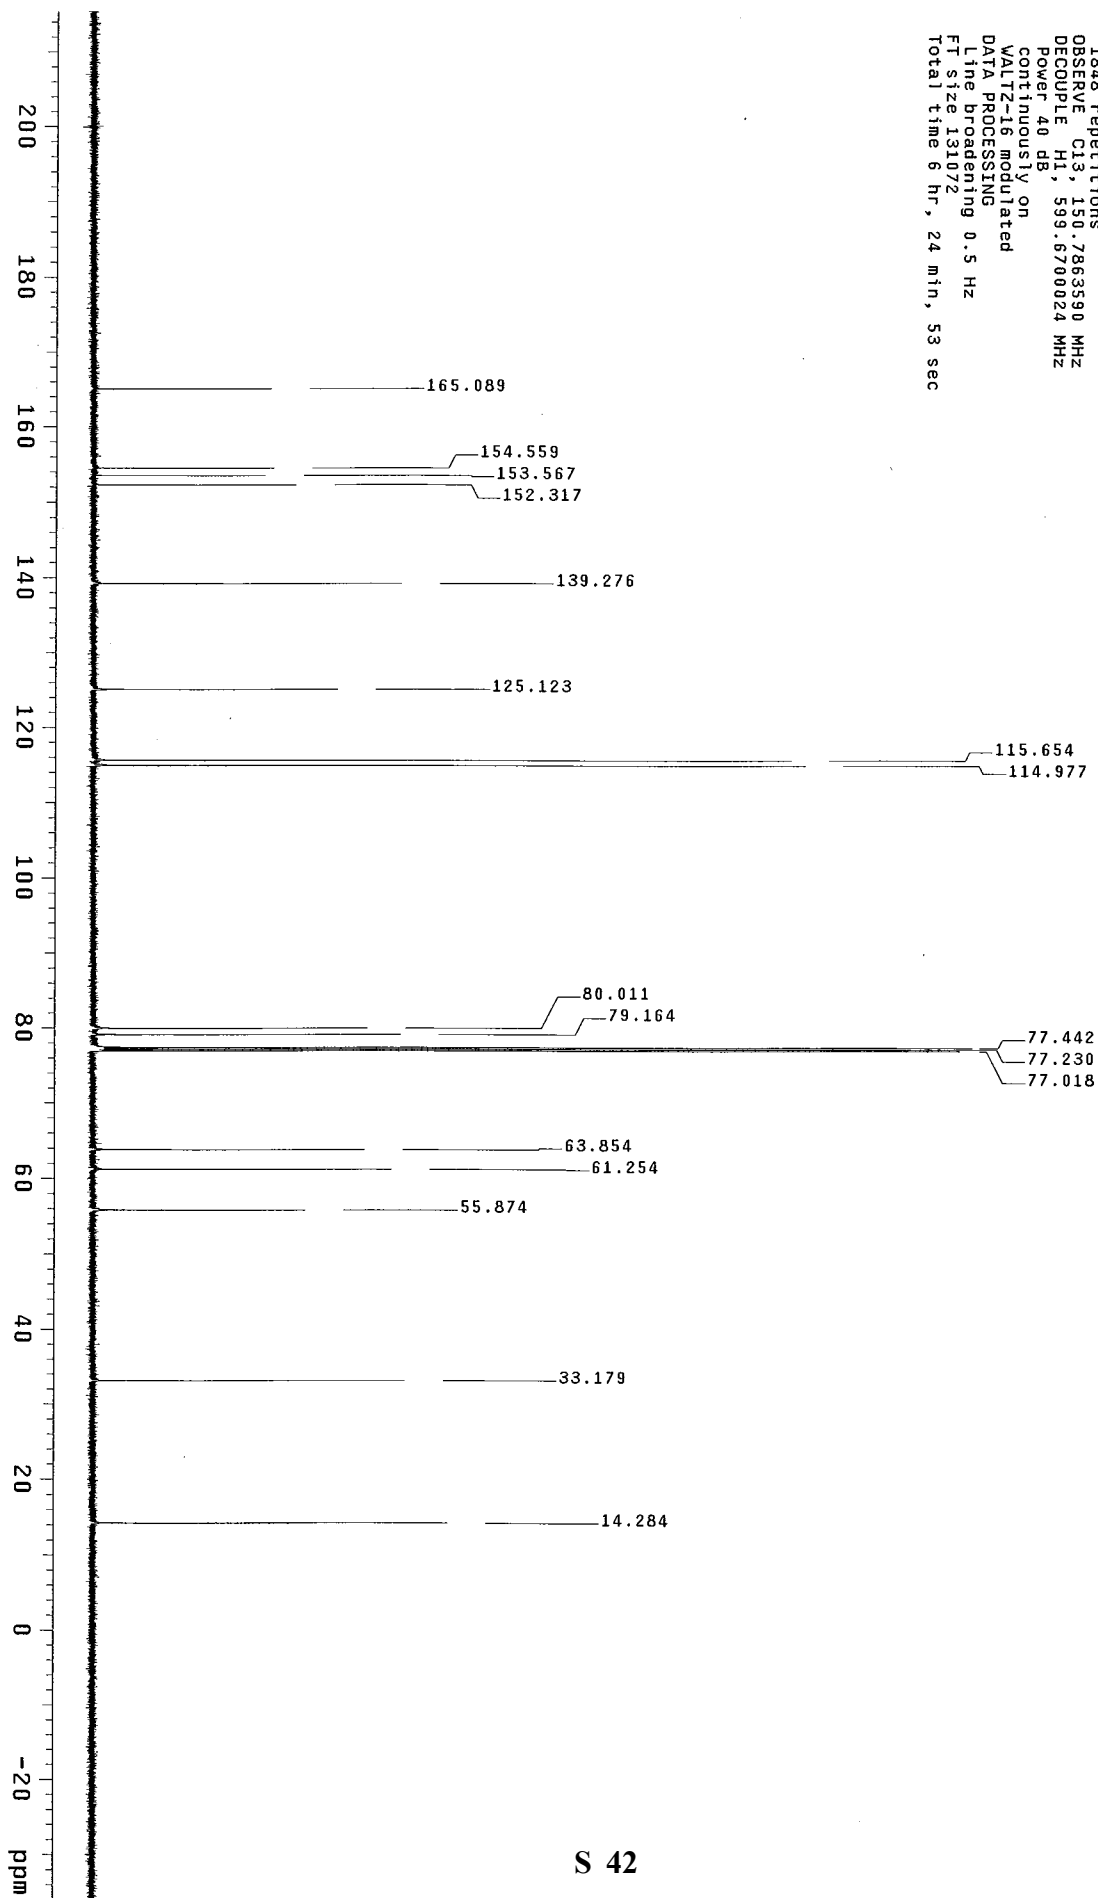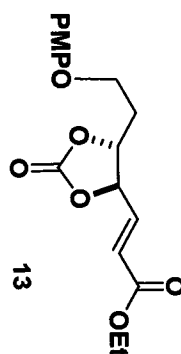

STANDARD PROTON PARAMETERS

Archive directory: /export/home/vnmr1/vnmrsys/data  
Sample directory:  
File: PROTON

Pulse Sequence: s2pu1

Solvent: CDCl3  
Temp: 28.0 C / 301.1 K  
INNOVA-600 "Inova600"

Relax. delay 1.000 sec

Pulse 26.9 degrees

Acq. time 1.892 sec

Width 9594.6 Hz

16 repetitions

OBSERVE H1 599.6669888 MHz

DATA PROCESSING

Line broadening 0.2 Hz

FT size 65536

Total time 0 min, 46 sec

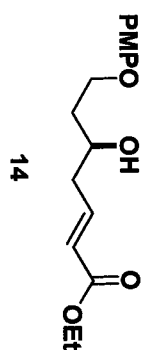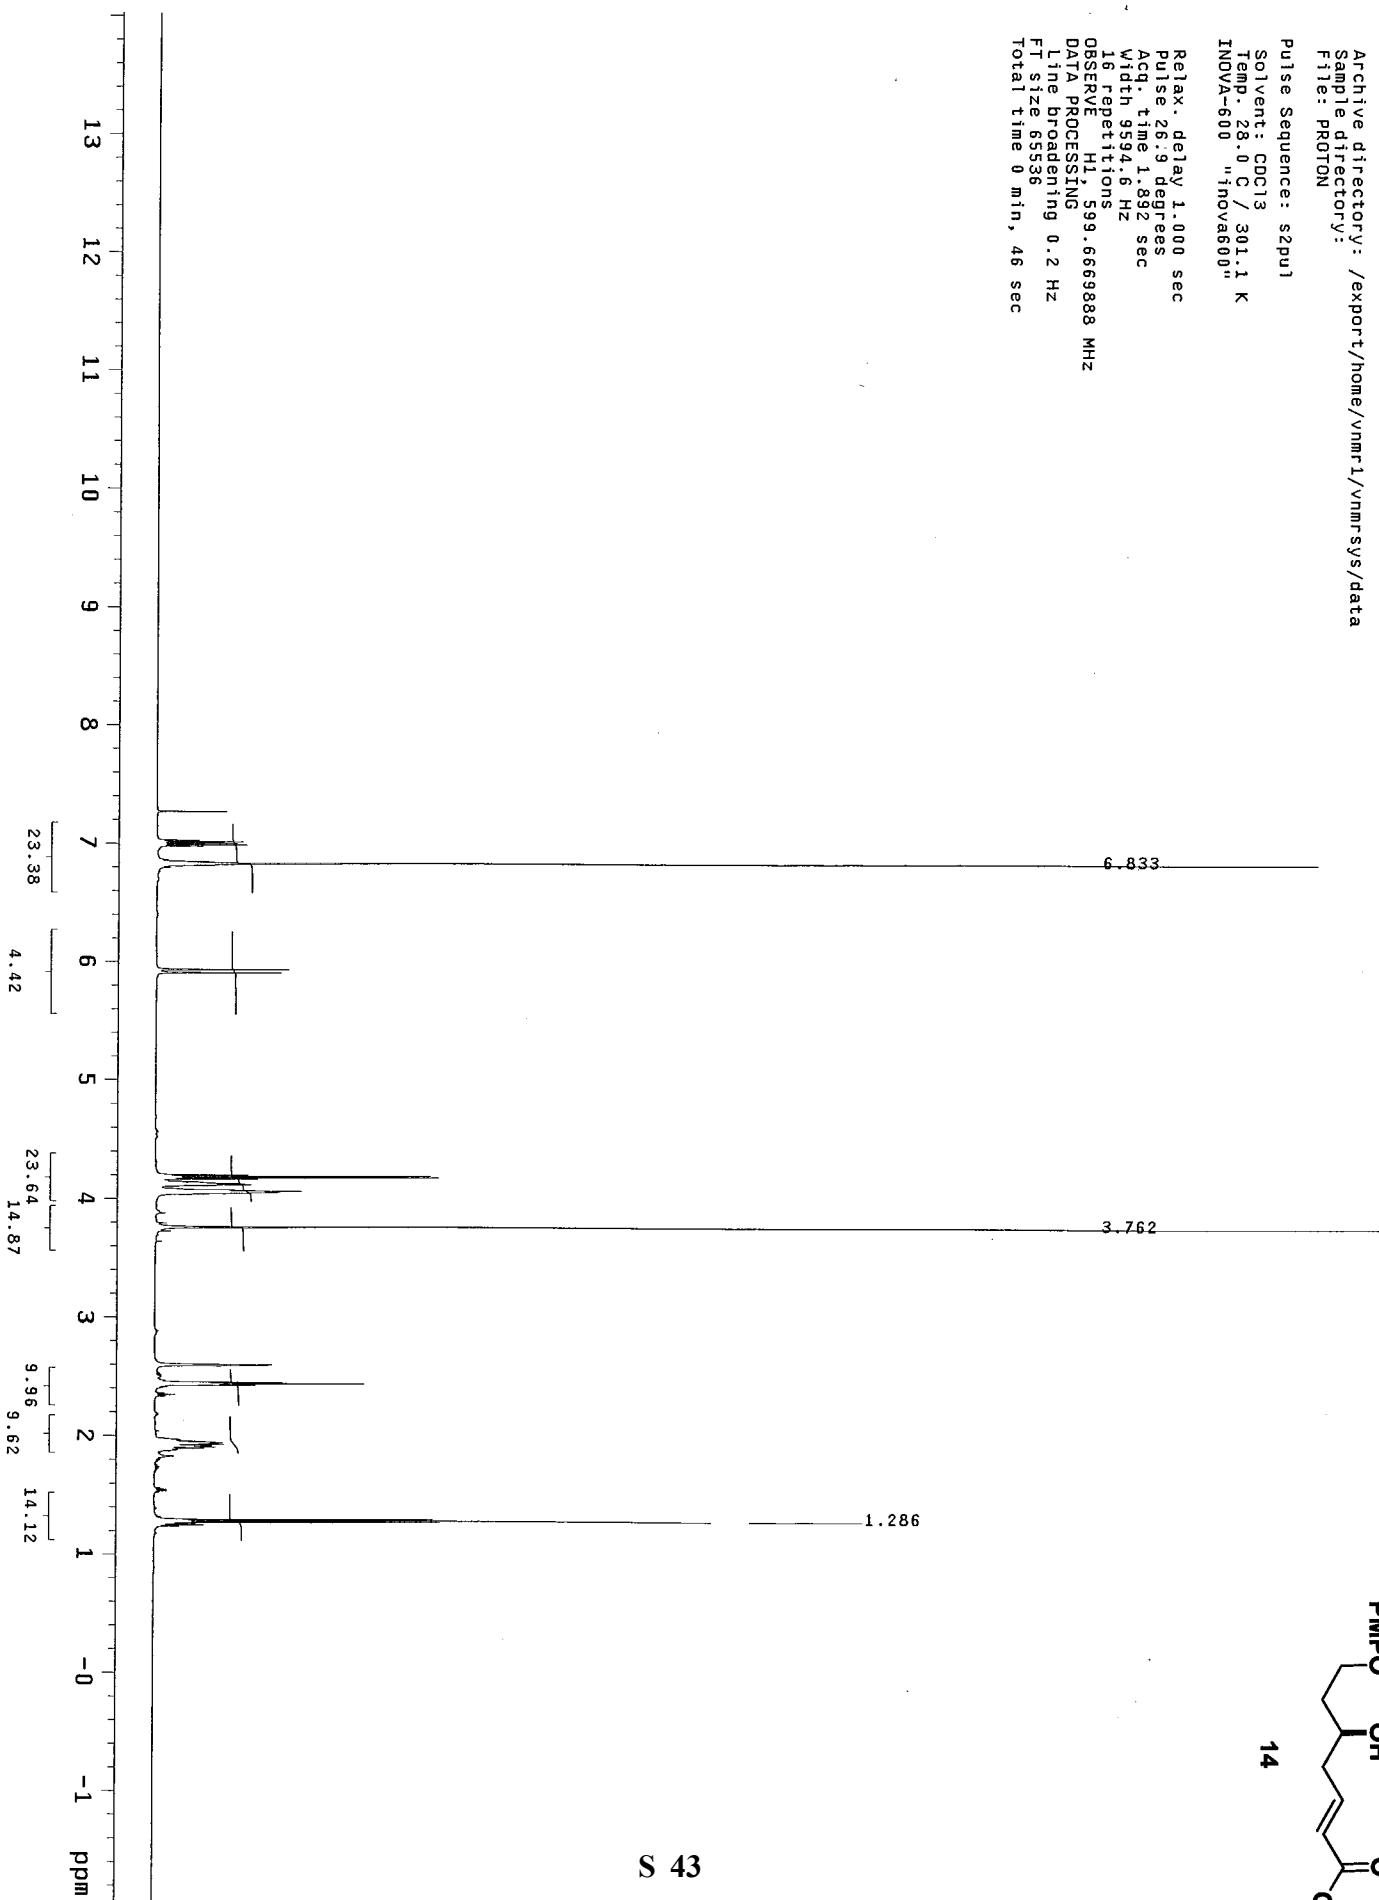

STANDARD CARBON PARAMETERS

Pulse Sequence: szpul

Solvent: CDCl<sub>3</sub>

Temp: 28.0 C / 301.1 K

User: 1-14-87

INOVA-600 "Inova600"

Relax. delay 1.000 sec

Pulse 36.5 degrees

Acq. time 1.300 sec

Width 38004.8 Hz

2168 repetitions

OBSERVE C13, 150.7363578 MHz

DECOUPLE H1, 599.6700024 MHz

Power 40 dB

continuously on

WALTZ-16 modulated

DATA PROCESSING

Line broadening 0.5 Hz

FT size 131072

Total time 64 hr, 8 min, 57 sec

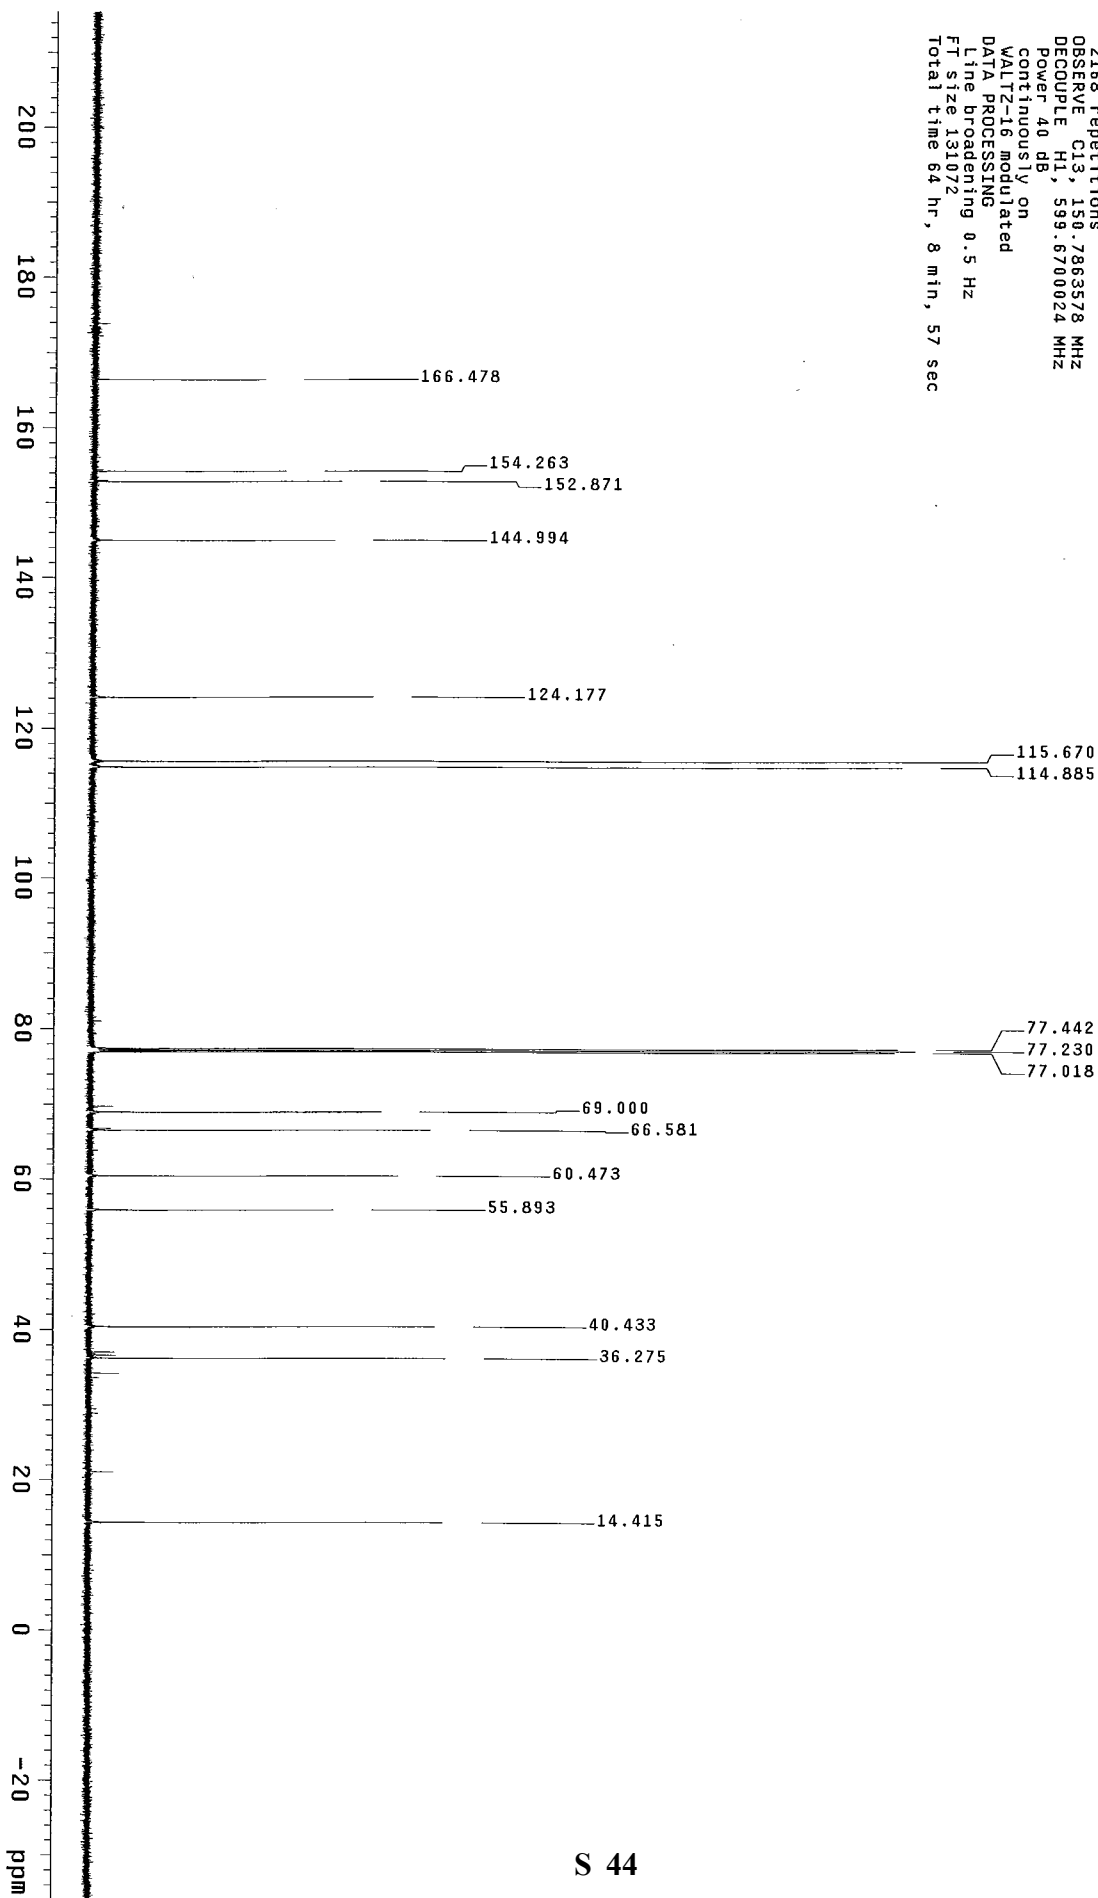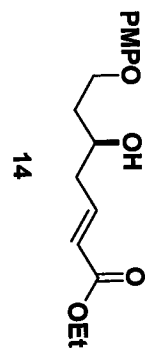

STANDARD PROTON PARAMETERS

Archive directory: /export/home/vnmr1/vnmr sys/data  
 Sample directory:  
 File: PROTON

Pulse Sequence: s2pu1

Solvent: CDCl3  
 Temp. 28.0 C / 301.1 K  
 INOVA-600 "inova600"

Relax. delay 1.000 sec  
 Pulse 26.9 degrees

Acq. time 1.892 sec

Width 9594.6 Hz

16 repetitions

OBSERVE H1, 599.666891 MHz

DATA PROCESSING

Line broadening 0.2 Hz

FT size 65536

Total time 0 min, 46 sec

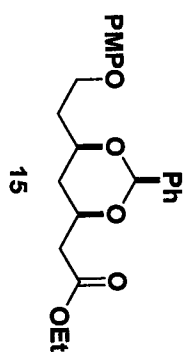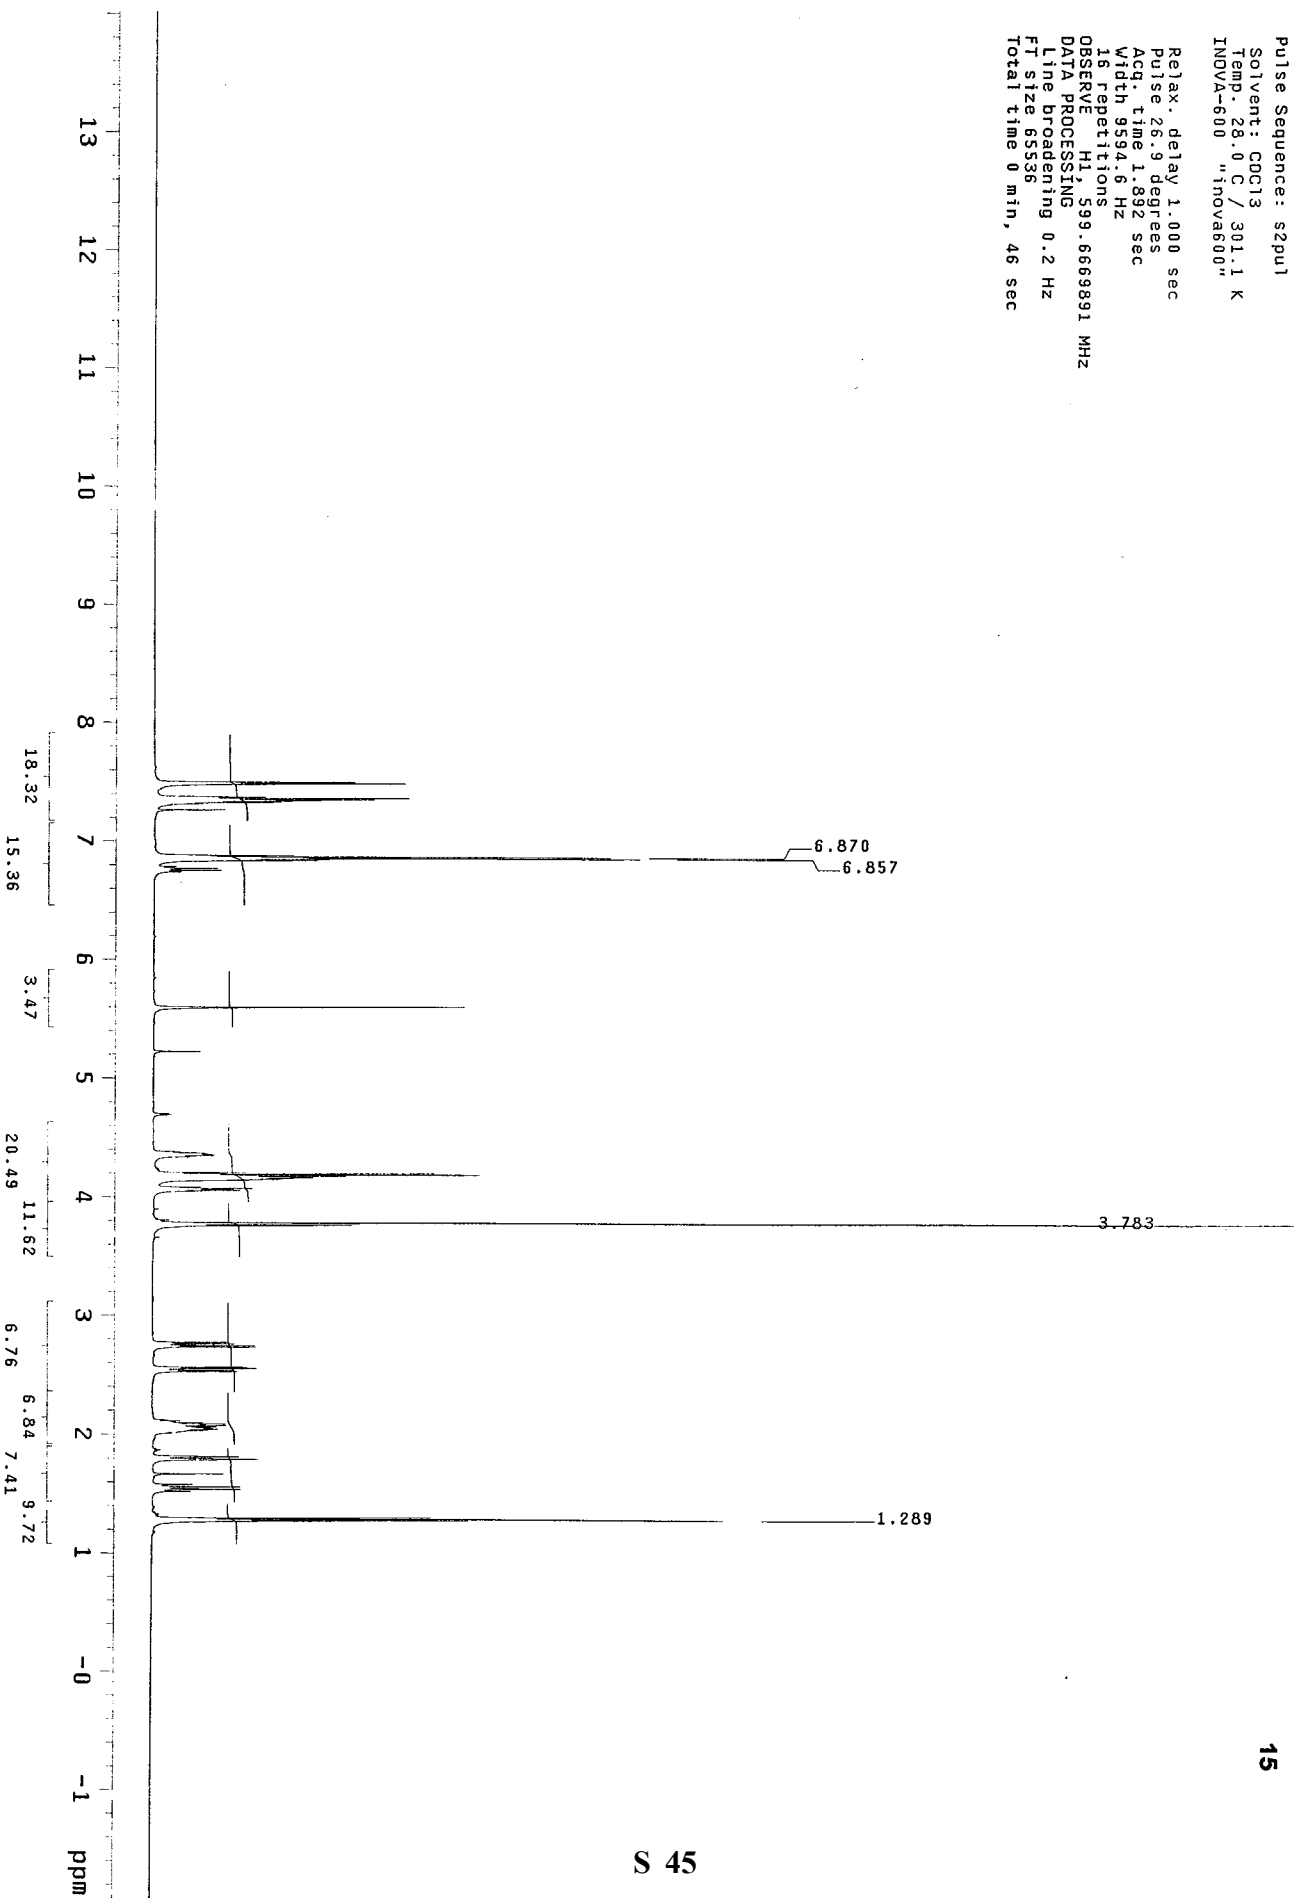

STANDARD CARBON PARAMETERS

Pulse Sequence: s2pul

Solvent: CDCl<sub>3</sub>

Temp: 29.0 C / 301.1 K

User: 1-14-87

INOVA-600 "Inova600"

Relax. delay 1.000 sec

Pulse 36.5 degrees

Acq. time 1.300 sec

Width 38004.8 Hz

88 repetitions

OBSERVE C13, 150.7863584 MHz

DECOUPLE H1, 599.6700024 MHz

Power 40 dB

continuously on

WALTZ-16 modulated

DATA PROCESSING

Line broadening 0.5 Hz

FT size 131072

Total time 641 hr, 29 min, 32 sec

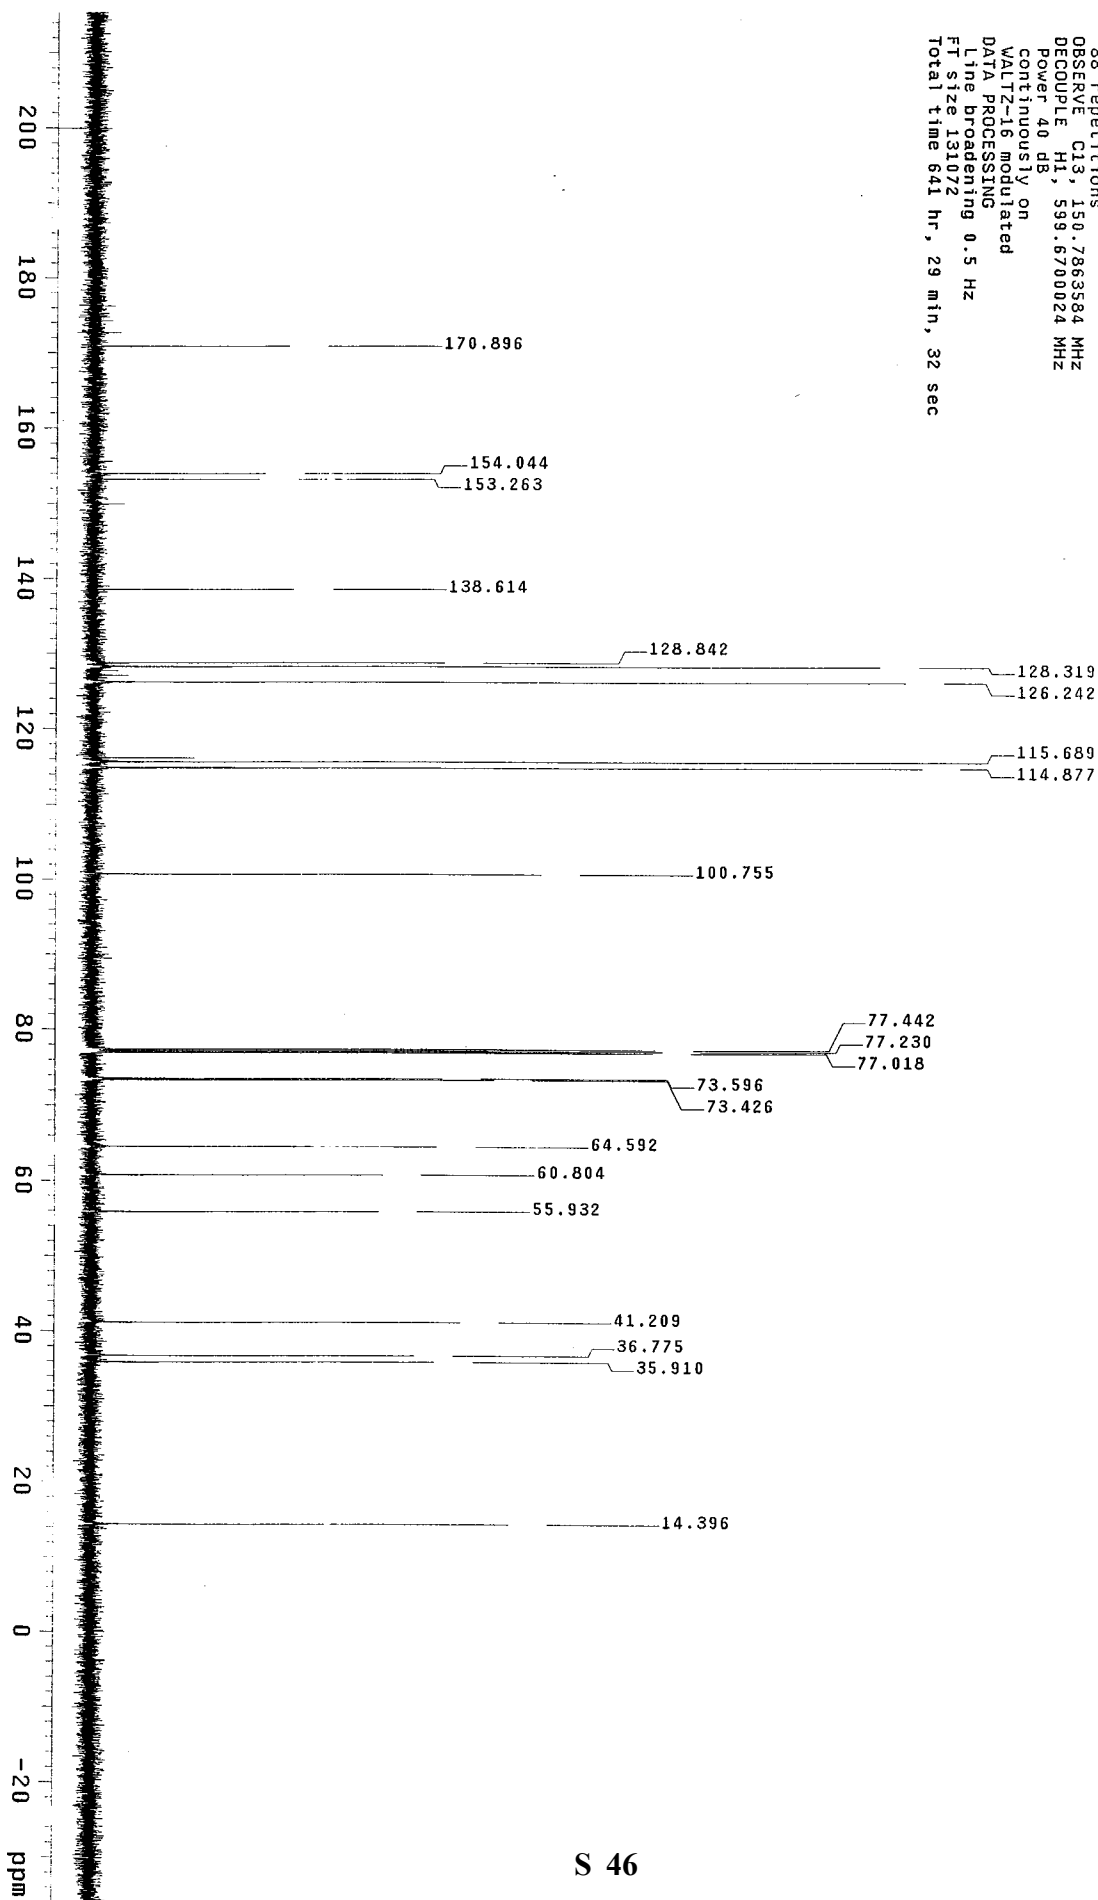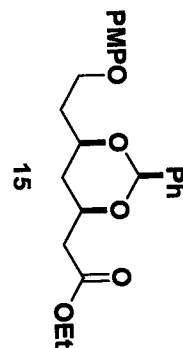

# STANDARD PROTON PARAMETERS

Archive directory: /export/home/vnmr1/vnmrsys/data  
Sample directory:  
File: PROTON

Pulse Sequence: s2pu1

Solvent: CDCl3  
Temp: 28.0 C / 301.1 K  
INNOVA-600 "innova600"

Relax. delay 1.000 sec  
Pulse 26.9 degrees

Acq. time 1.892 sec  
Width 9594.6 Hz

16 repetitions

OBSERVE H1, 599.666900 MHz

DATA PROCESSING

Line broadening 0.2 Hz

FT size 65536

Total time 0 min, 46 sec

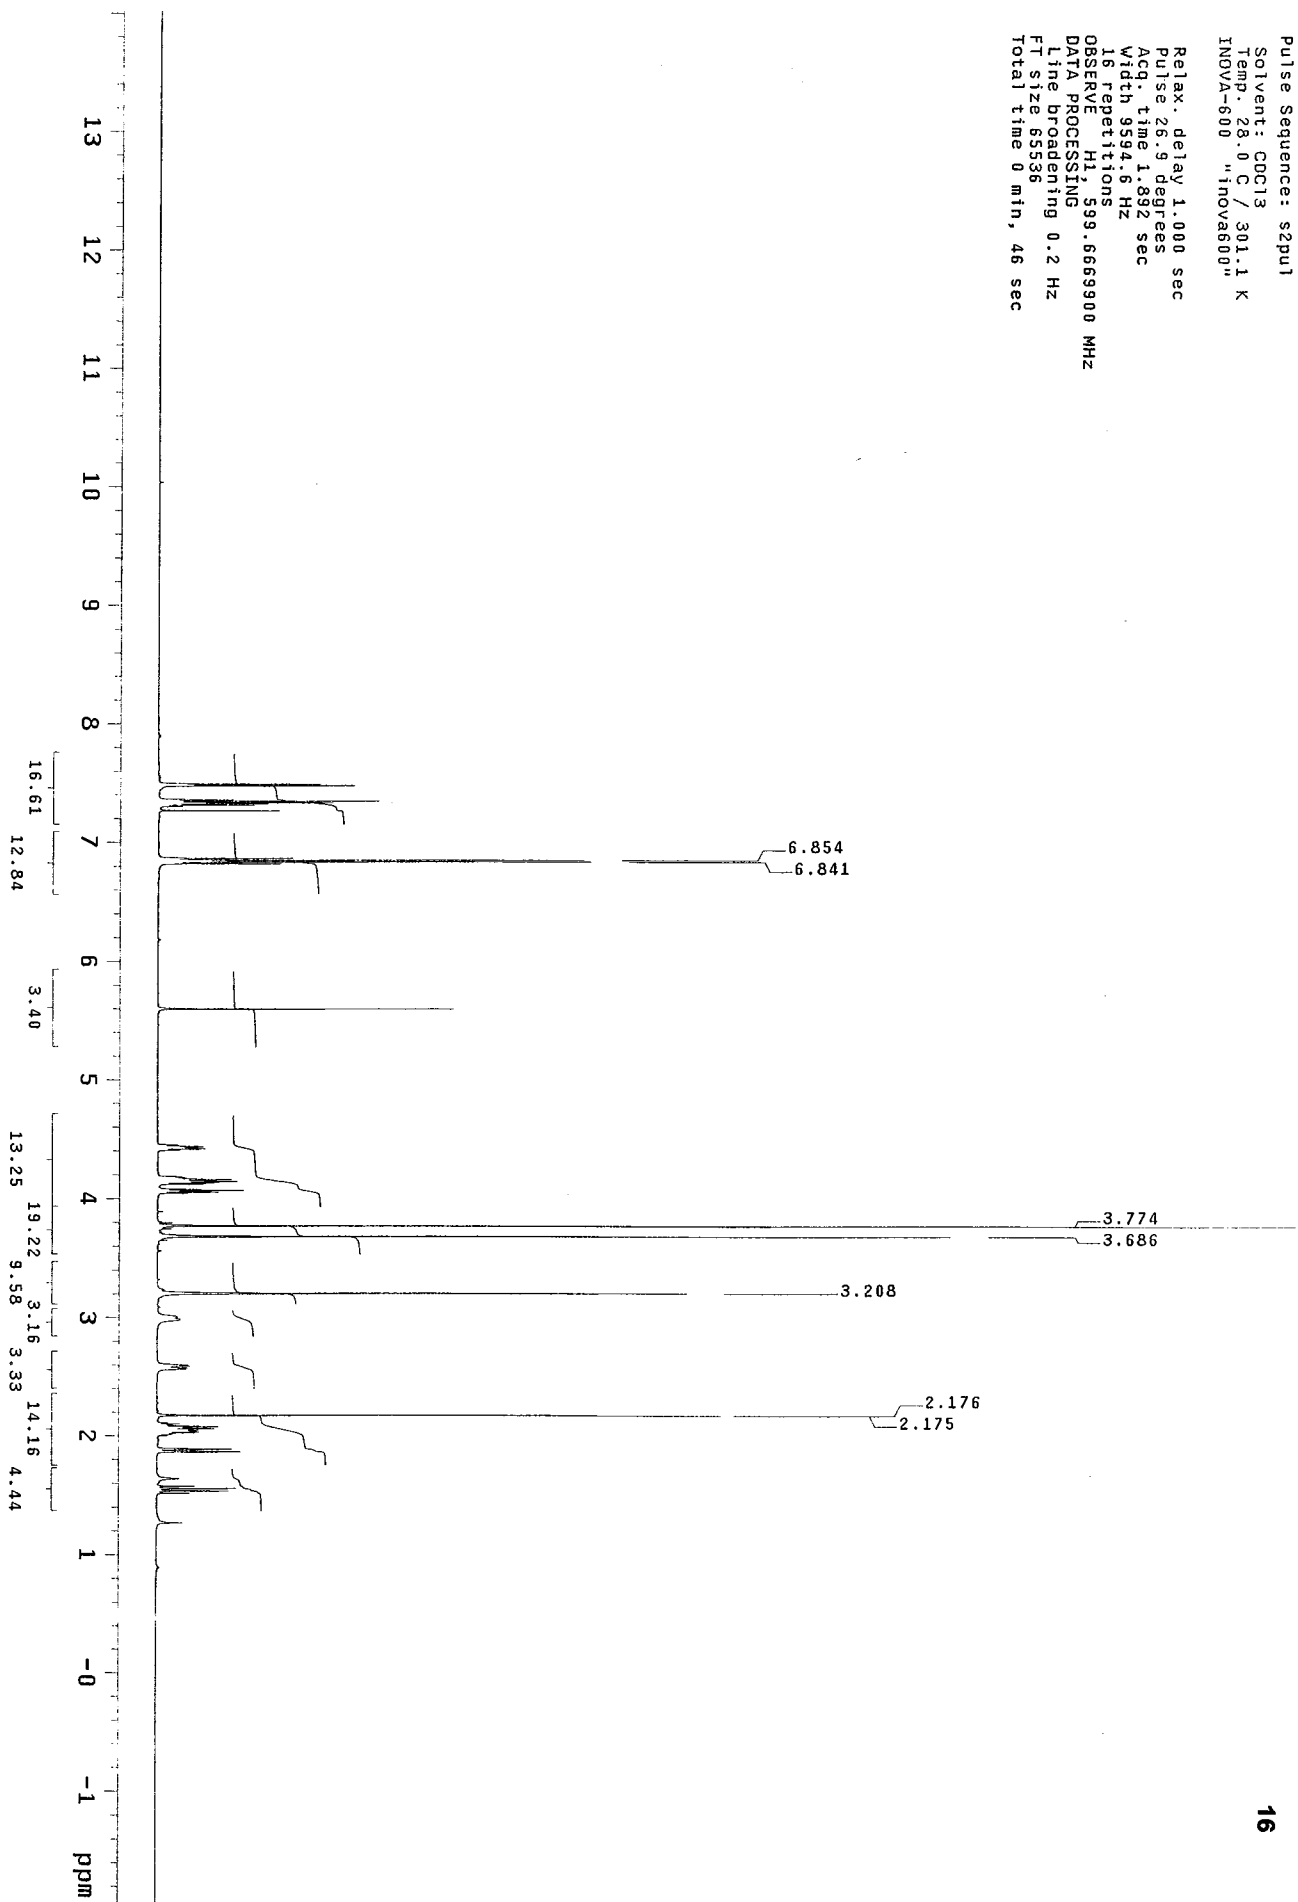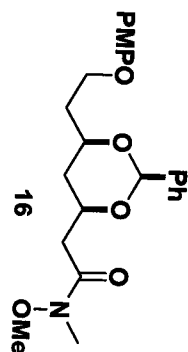

STANDARD CARBON PARAMETERS

Pulse Sequence: s2pul1

Solvent: CDCl3

Temp: 28.0 C / 301.1 K

User: 1-14-87

INNOVA-600 "innova600"

Relax. delay 1.000 sec

Pulse 36.5 degrees

Acq. time 1.300 sec

Width 38004.8 Hz

17632 repetitions

OBSERVE C13, 150.7863538 MHz

DECOUPLE H1, 599.6700024 MHz

Power 40 dB

continuously on

WALTZ-16 modulated

DATA PROCESSING

Line broadening 0.5 Hz

FT size 131072

Total time 64 hr, 8 min, 57 sec

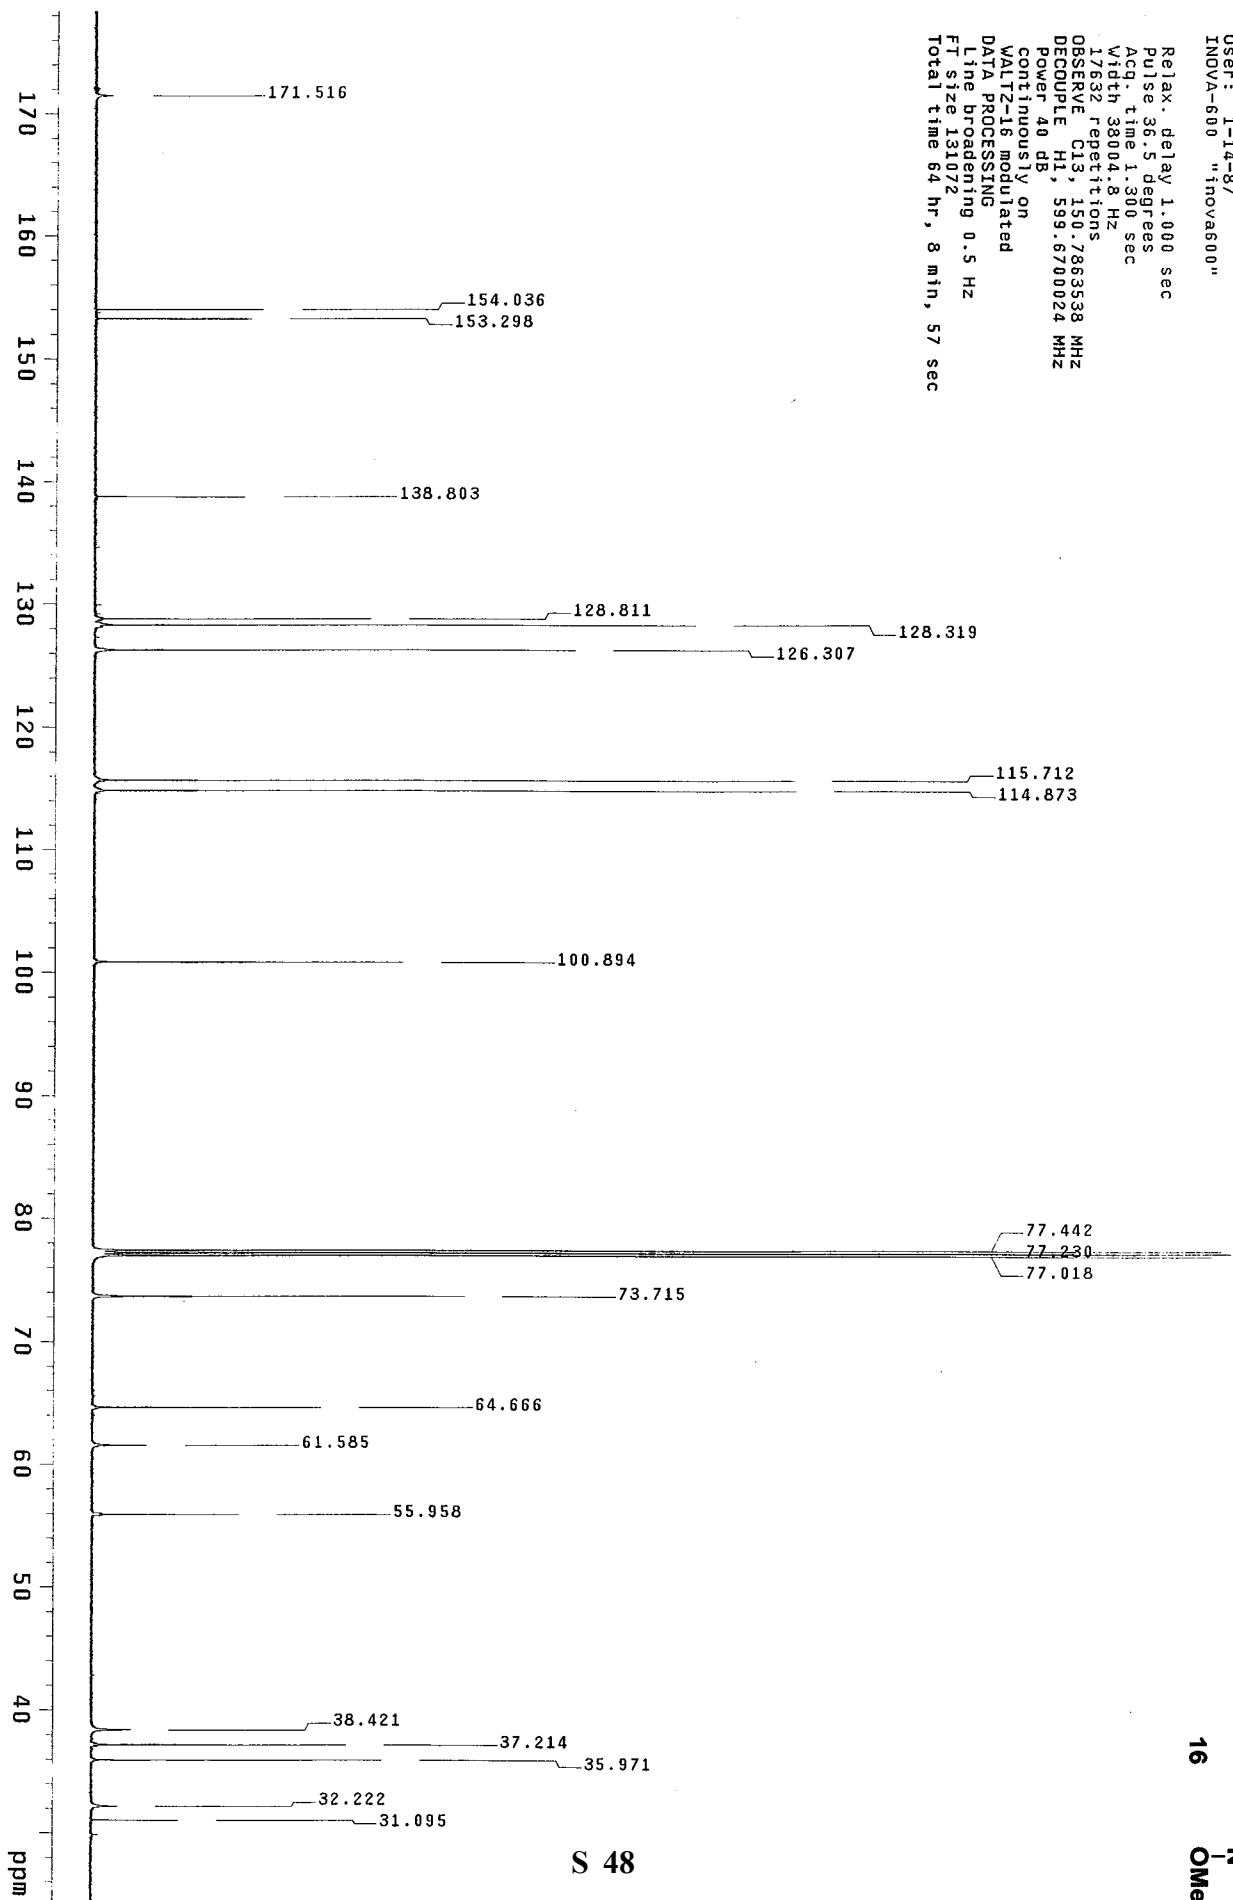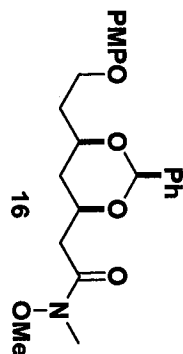

# STANDARD PROTON PARAMETERS

Archive directory: /export/home/vnmr1/vnmrSYS/data  
Sample directory:  
File: PROTON

Pulse Sequence: s2pu1

Solvent: CDCl3  
Temp: 28.0 C / 301.1 K  
INNOVA-600 "Inova600"

Relax. delay 1.000 sec  
Pulse 26.9 degrees

Acq. time 1.892 sec

Width 9594.6 Hz

16 repetitions

OBSERVE H1, 599.6669897 MHz

DATA PROCESSING

line broadening 0.2 Hz

FT size 65536

Total time 0 min, 46 sec

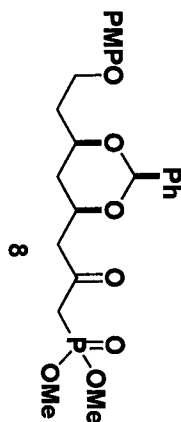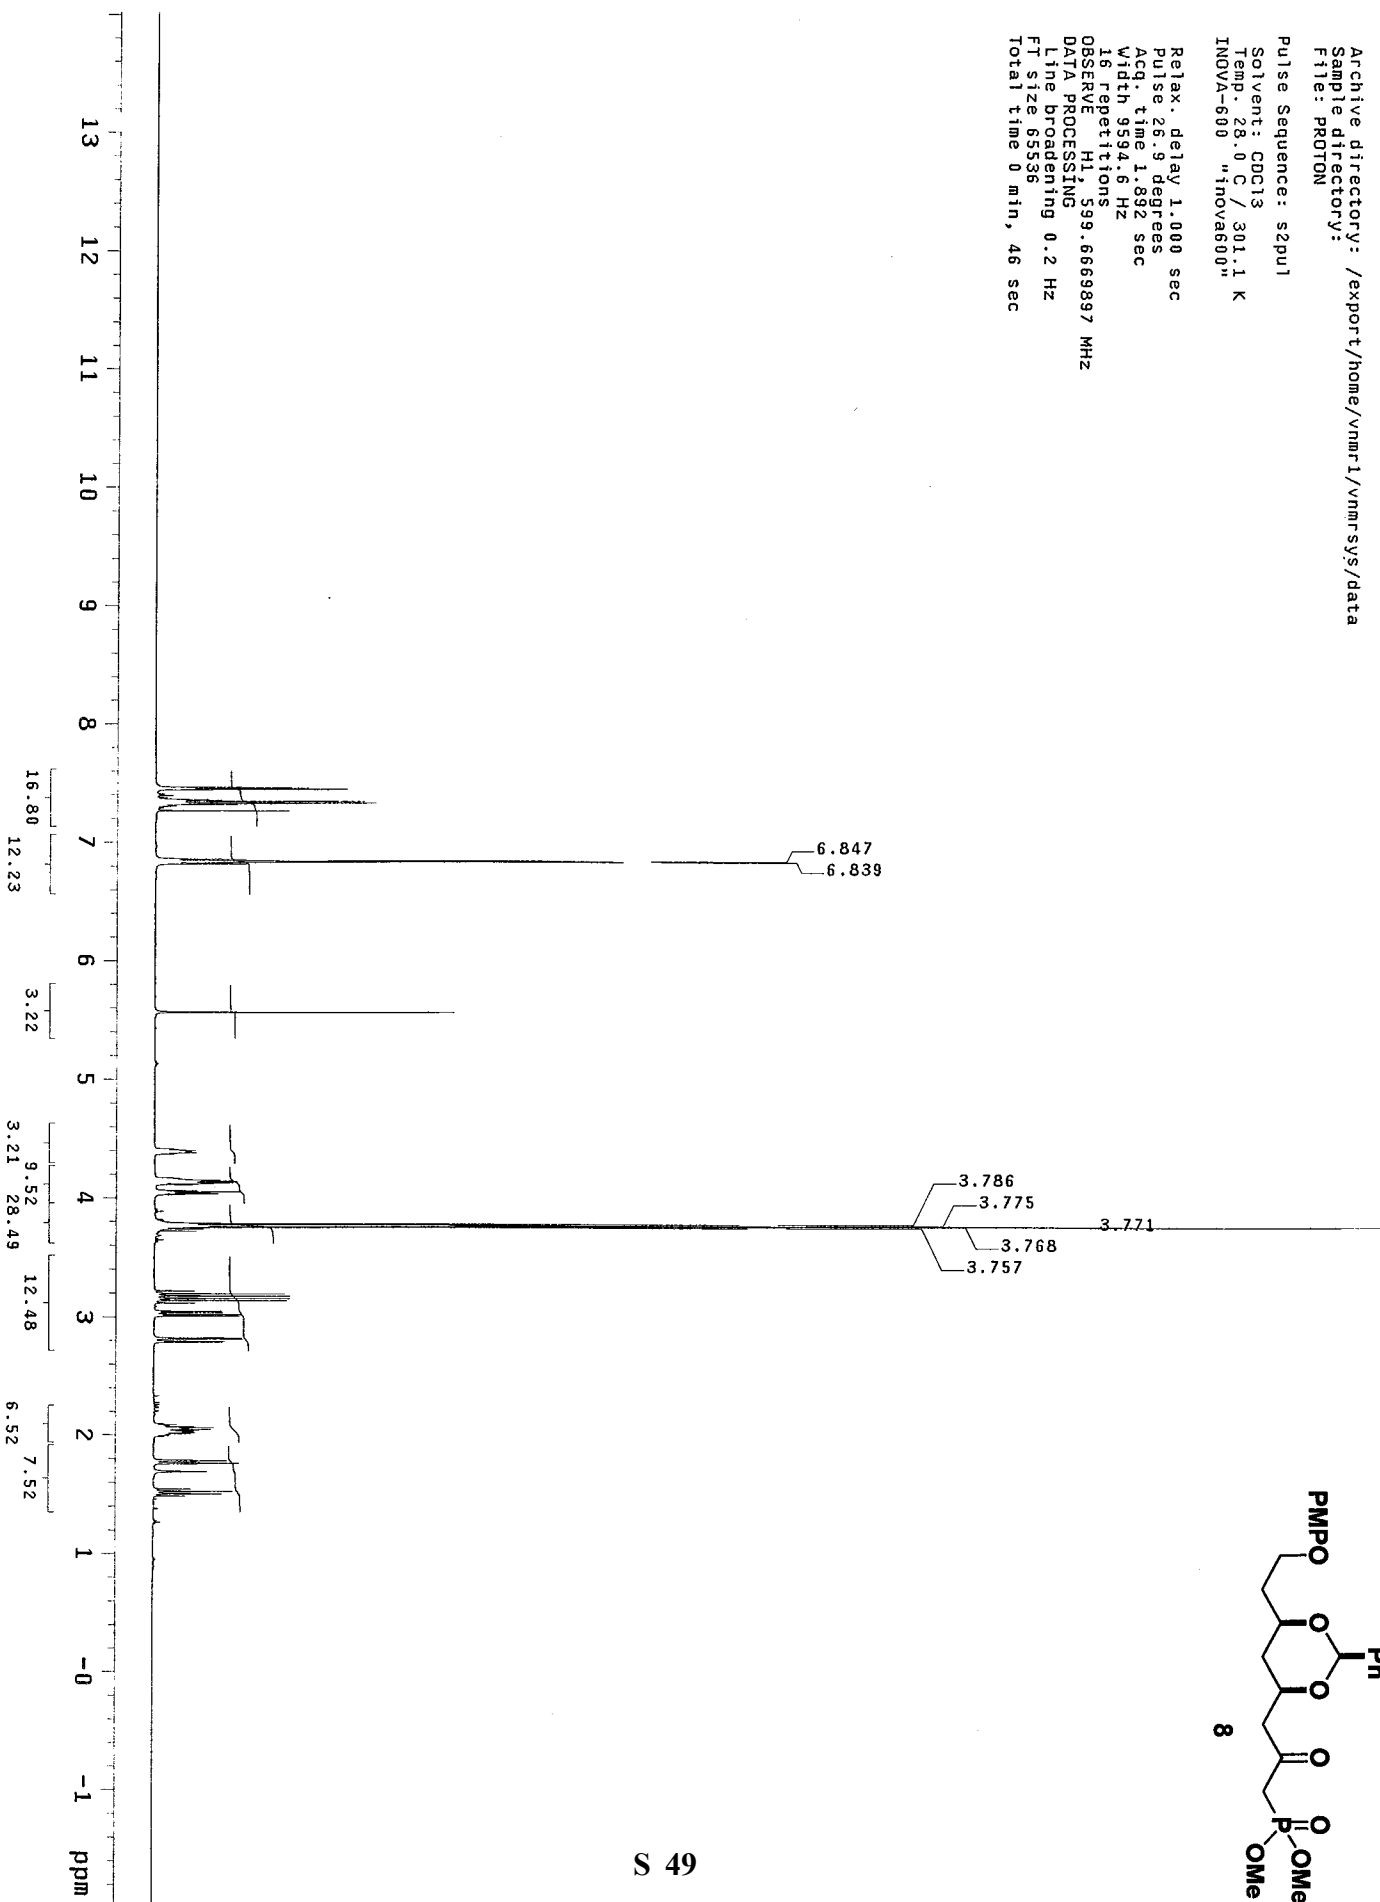

STANDARD CARBON PARAMETERS

Pulse Sequence: szpu1

Solvent: CDCl<sub>3</sub>

Temp. 28.0 C / 301.1 K

User: 1-14-87

INOV-600 "inova600"

Relax. delay 1.00 sec

Pulse 36.5 degrees

Acq. time 1.300 sec

Width 38004.8 Hz

1120 repetitions

OBSERVE C13, 150.7863538 MHz

DECOUPLE H1, 599.6700024 MHz

Power 40 dB

continuously on

WALTZ-16 modulated

DATA PROCESSING

Line broadening 0.5 Hz

FT size 131072

Total time 6 hr, 24 min, 53 sec

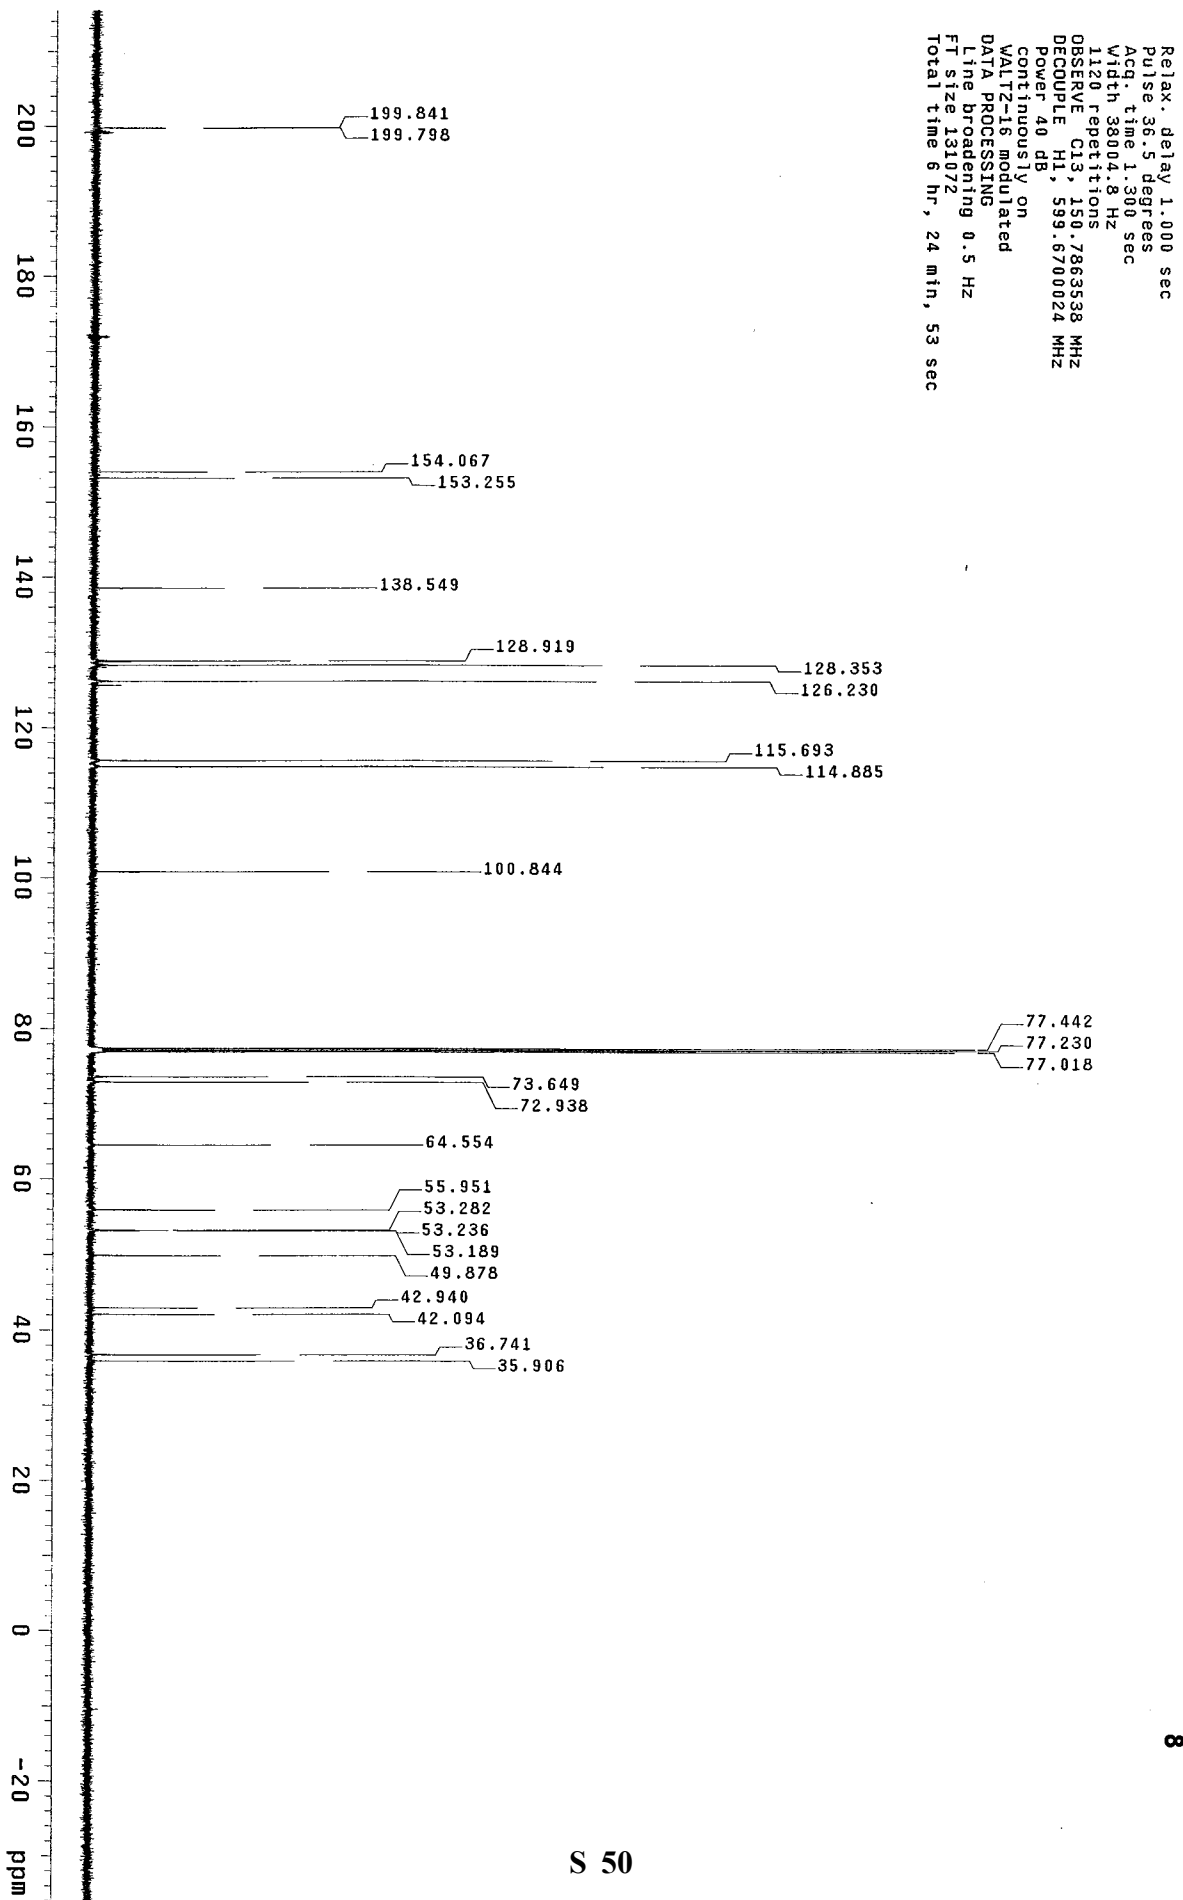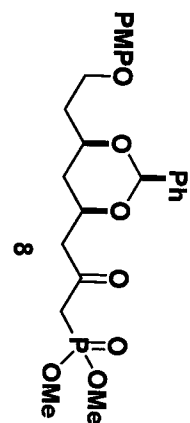

# STANDARD PROTON PARAMETERS

Archive directory: /export/home/vnmr1/vnmrsys/data  
Sample directory:  
File: PROTON

Pulse Sequence: s2pu1

Solvent: CDCl3

Temp: 28.0 C / 301.1 K

INOVA-600 "Inova600"

Relax. delay 1.000 sec

Pulse 26.9 degrees

Acq. time 1.892 sec

Width 9594.6 Hz

16 repetitions

OBSERVE H1, 599.6669831 MHz

DATA PROCESSING

Line broadening 0.2 Hz

FI size 6536

Total time 0 min, 46 sec

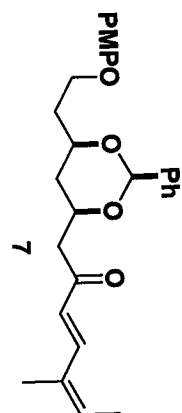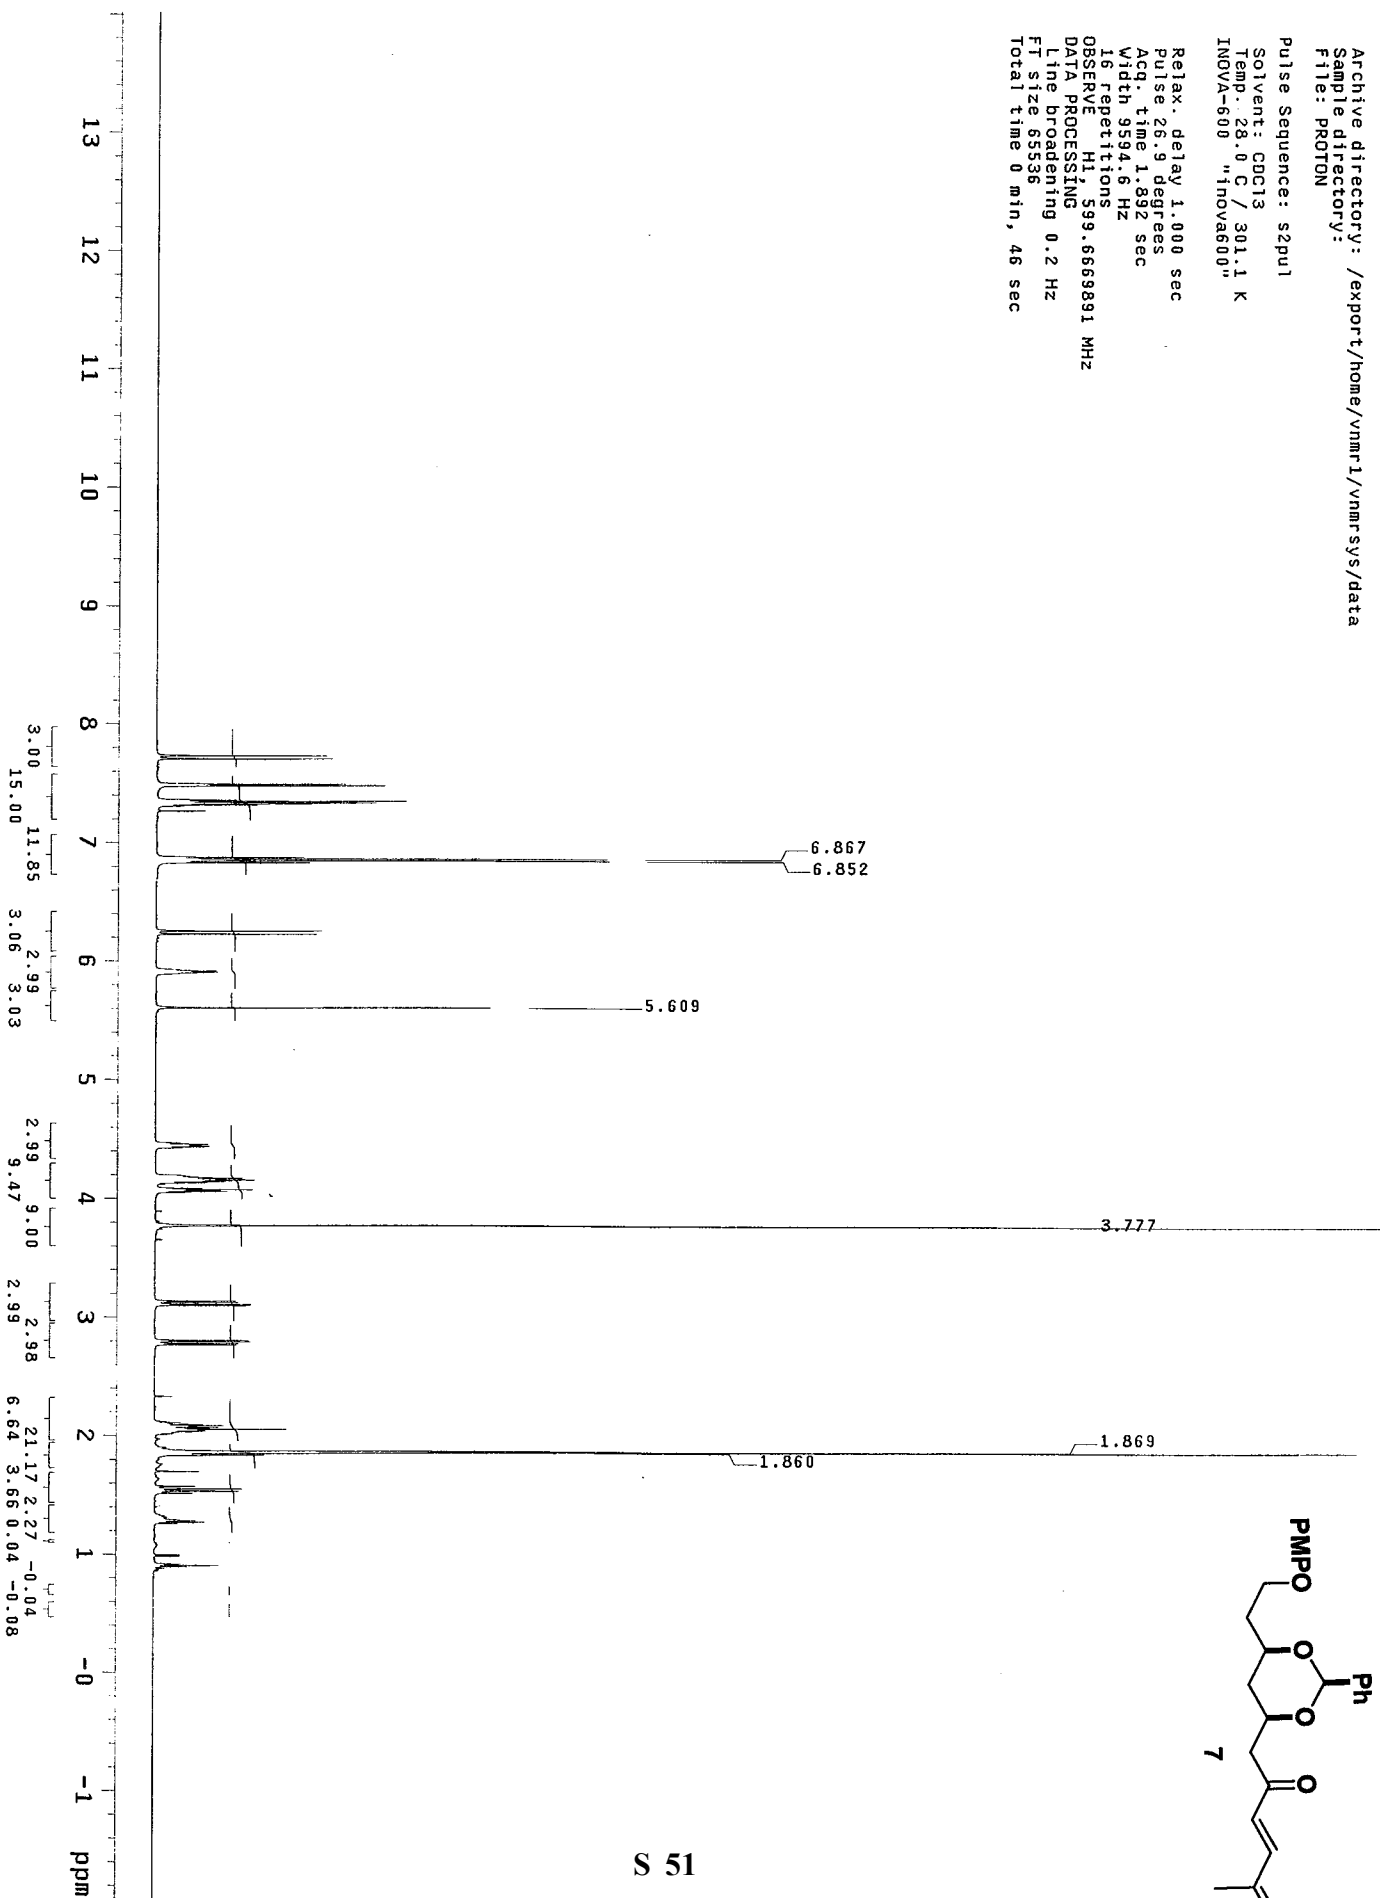

STANDARD CARBON PARAMETERS

Pulse Sequence: szpu1

Solvent: CDCl<sub>3</sub>

Temp: 28.0 C / 301.1 K

User: 1-14-87

INOV-600 "inov600"

Relax. delay 1.000 sec

Pulse 36.5 degrees

Acq. time 1.300 sec

Width 38004.8 Hz

264 repetitions

OBSERVE C13, 150.763619 MHz

DECOUPLE H1, 599.670024 MHz

Power 40 dB

continuously on

WALTZ-16 modulated

DATA PROCESSING

Line broadening 0.5 Hz

FT size 131072

Total time 64 hr, 8 min, 57 sec

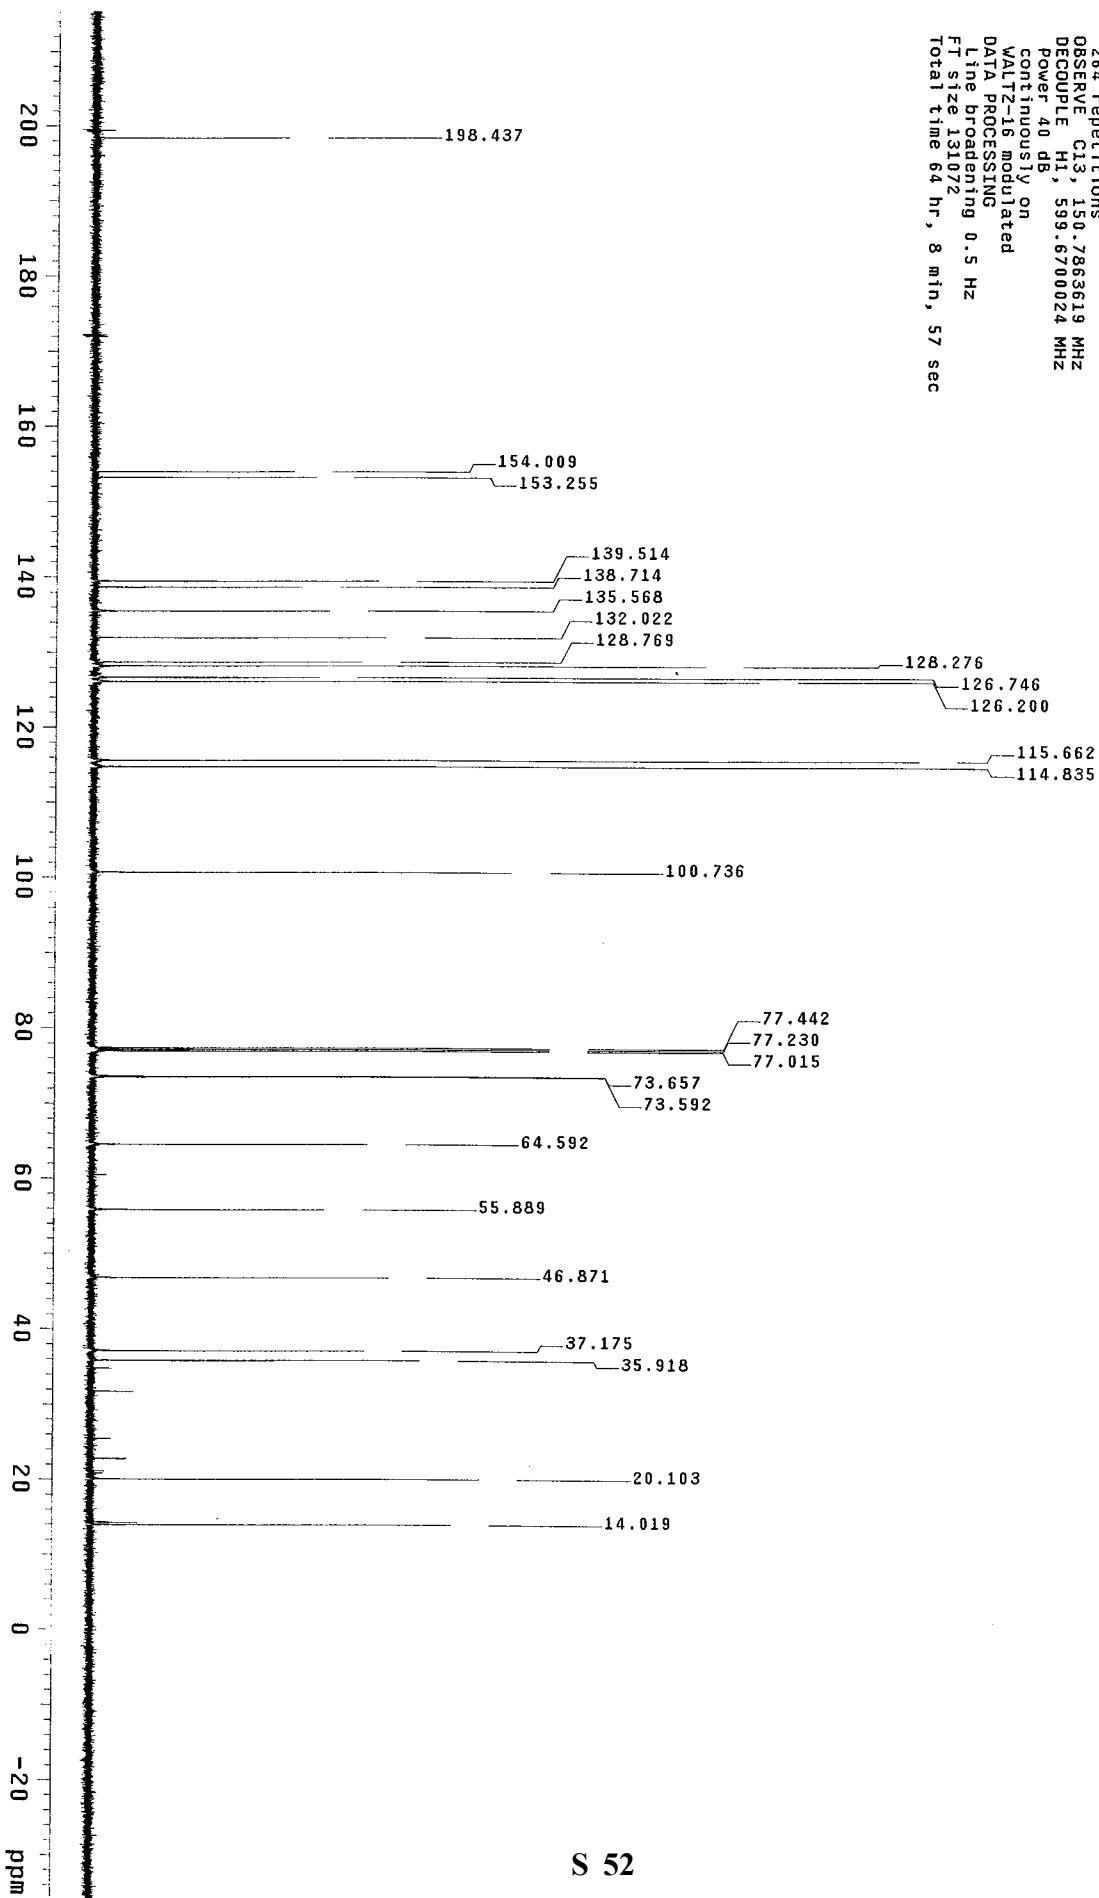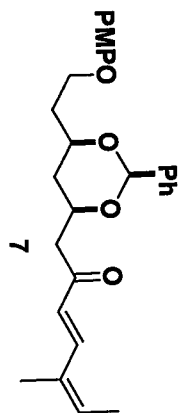

# STANDARD PROTON PARAMETERS

Archive directory: /export/home/vnmr1/vnmrSYS/data  
 Sample directory:  
 File: PROTON

Pulse Sequence: s2pu1  
 Solvent: CDCl3  
 Temp: 28.0 C / 301.1 K  
 INOVA-600 "Inova600"

Relax. delay 1.000 sec  
 Pulse 26.9 degrees  
 Acq. time 1.892 sec  
 Width 9594.6 Hz  
 16 repetitions

OBSERVE H1 599.6669897 MHz  
 DATA PROCESSING  
 Line broadening 0.2 Hz  
 FT size 65536  
 Total time 0 min, 46 sec

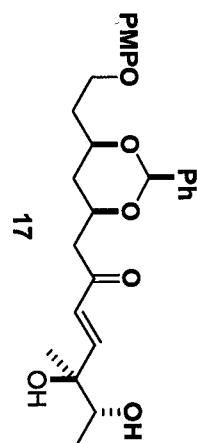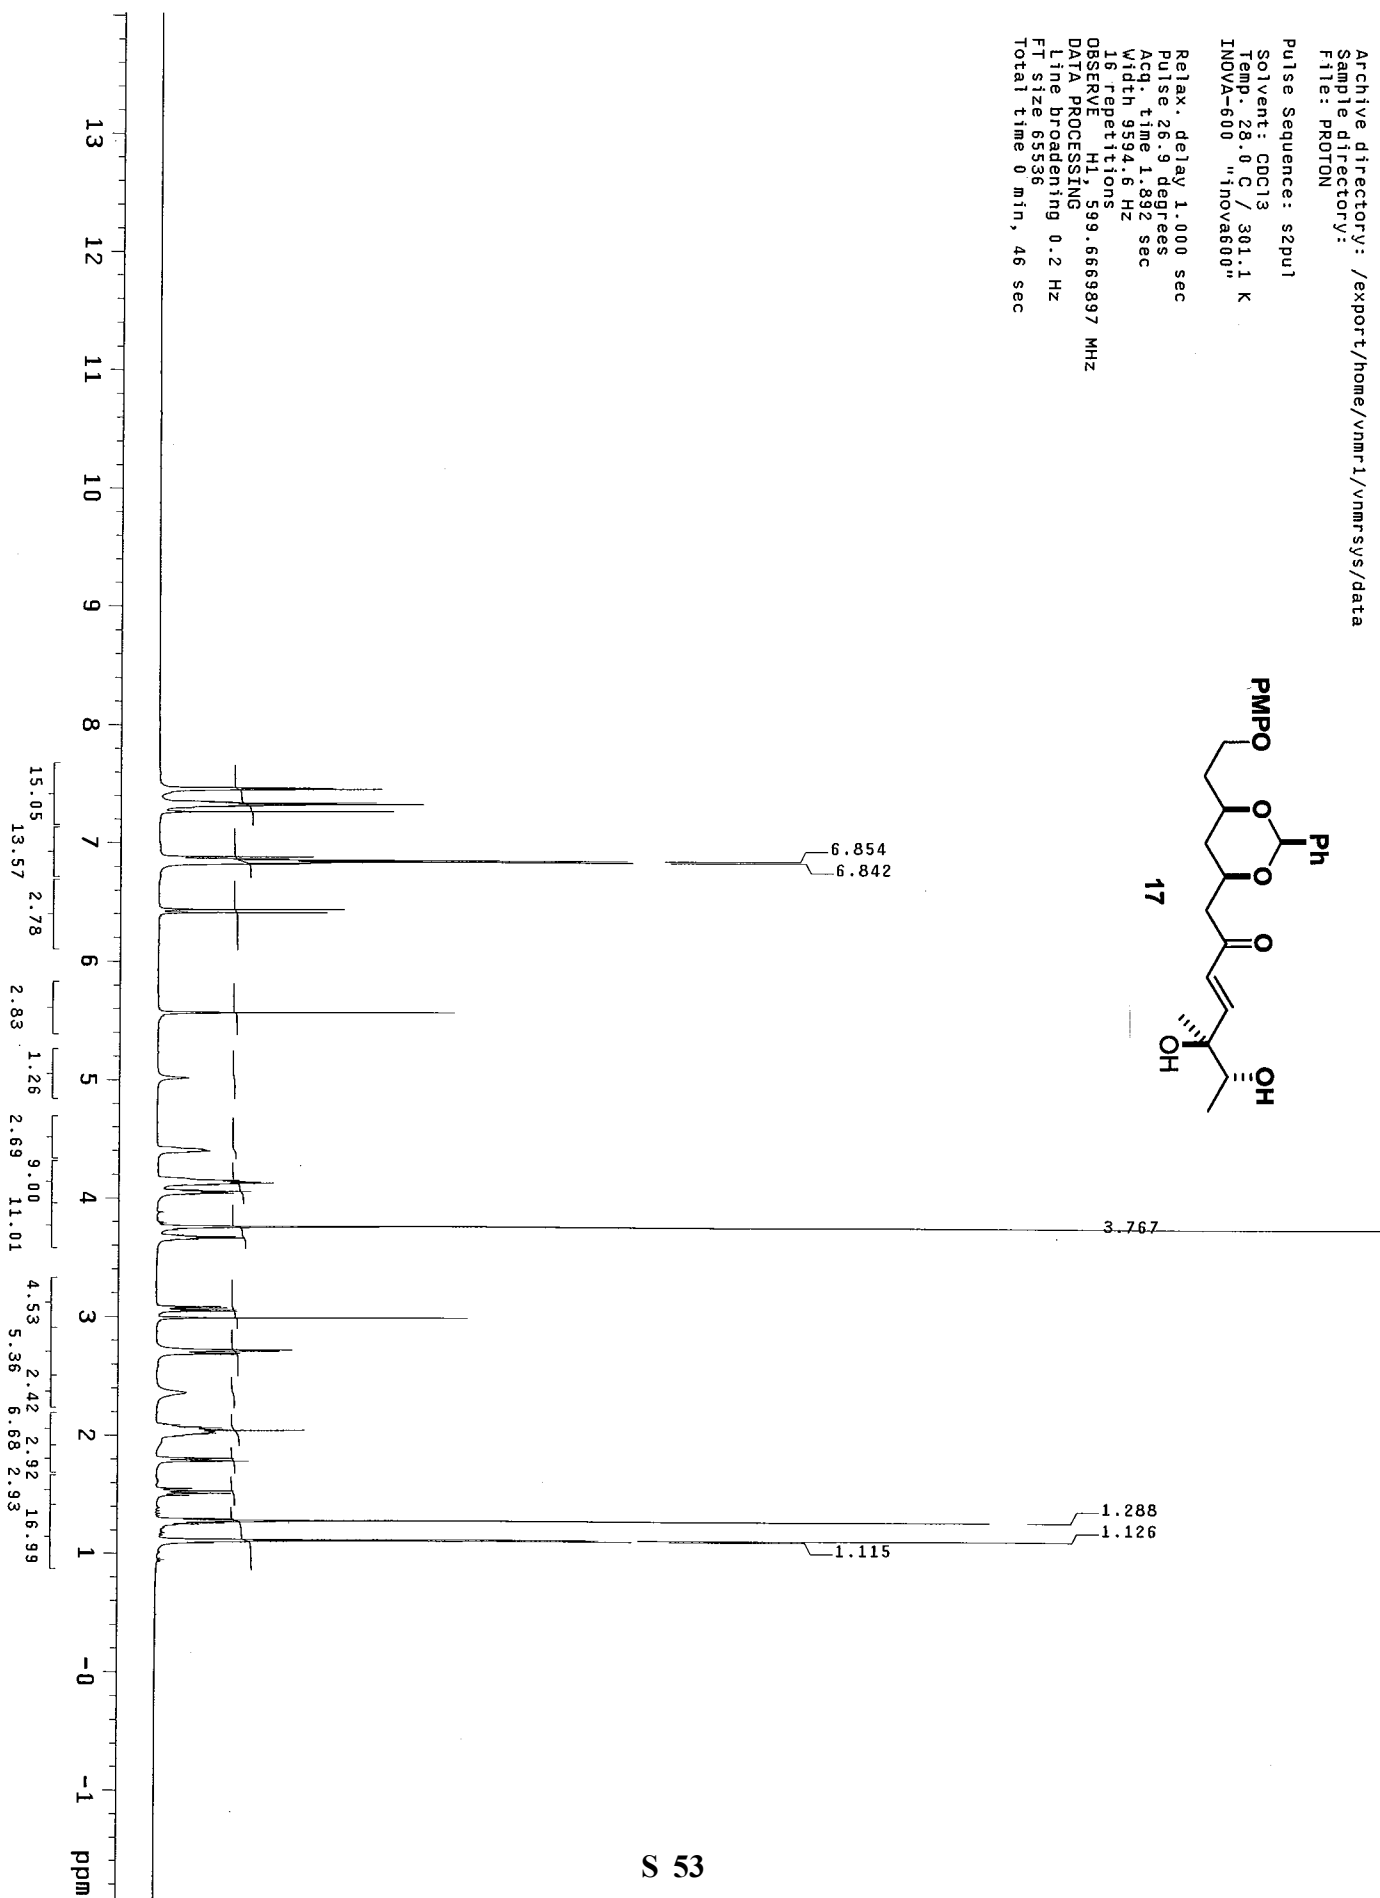

STANDARD CARBON PARAMETERS

Pulse Sequence: szpul

Solvent: CDCl<sub>3</sub>

Temp: 29.0 C / 301.1 K

User: 1-14-87

INOVA-600 "Inova600"

Relax. delay 1.000 sec

Pulse 36.5 degrees

Acq. time 1.300 sec

Width 38004.8 Hz

1000 repetitions

OBSERVE C13, 150.7863625 MHz

DECOUPLE H1, 599.6700024 MHz

Power 40 dB

continuously on

WALTZ-16 modulated

DATA PROCESSING

Line broadening 0.5 Hz

FT size 131072

Total time 64 hr, 8 min, 57 sec

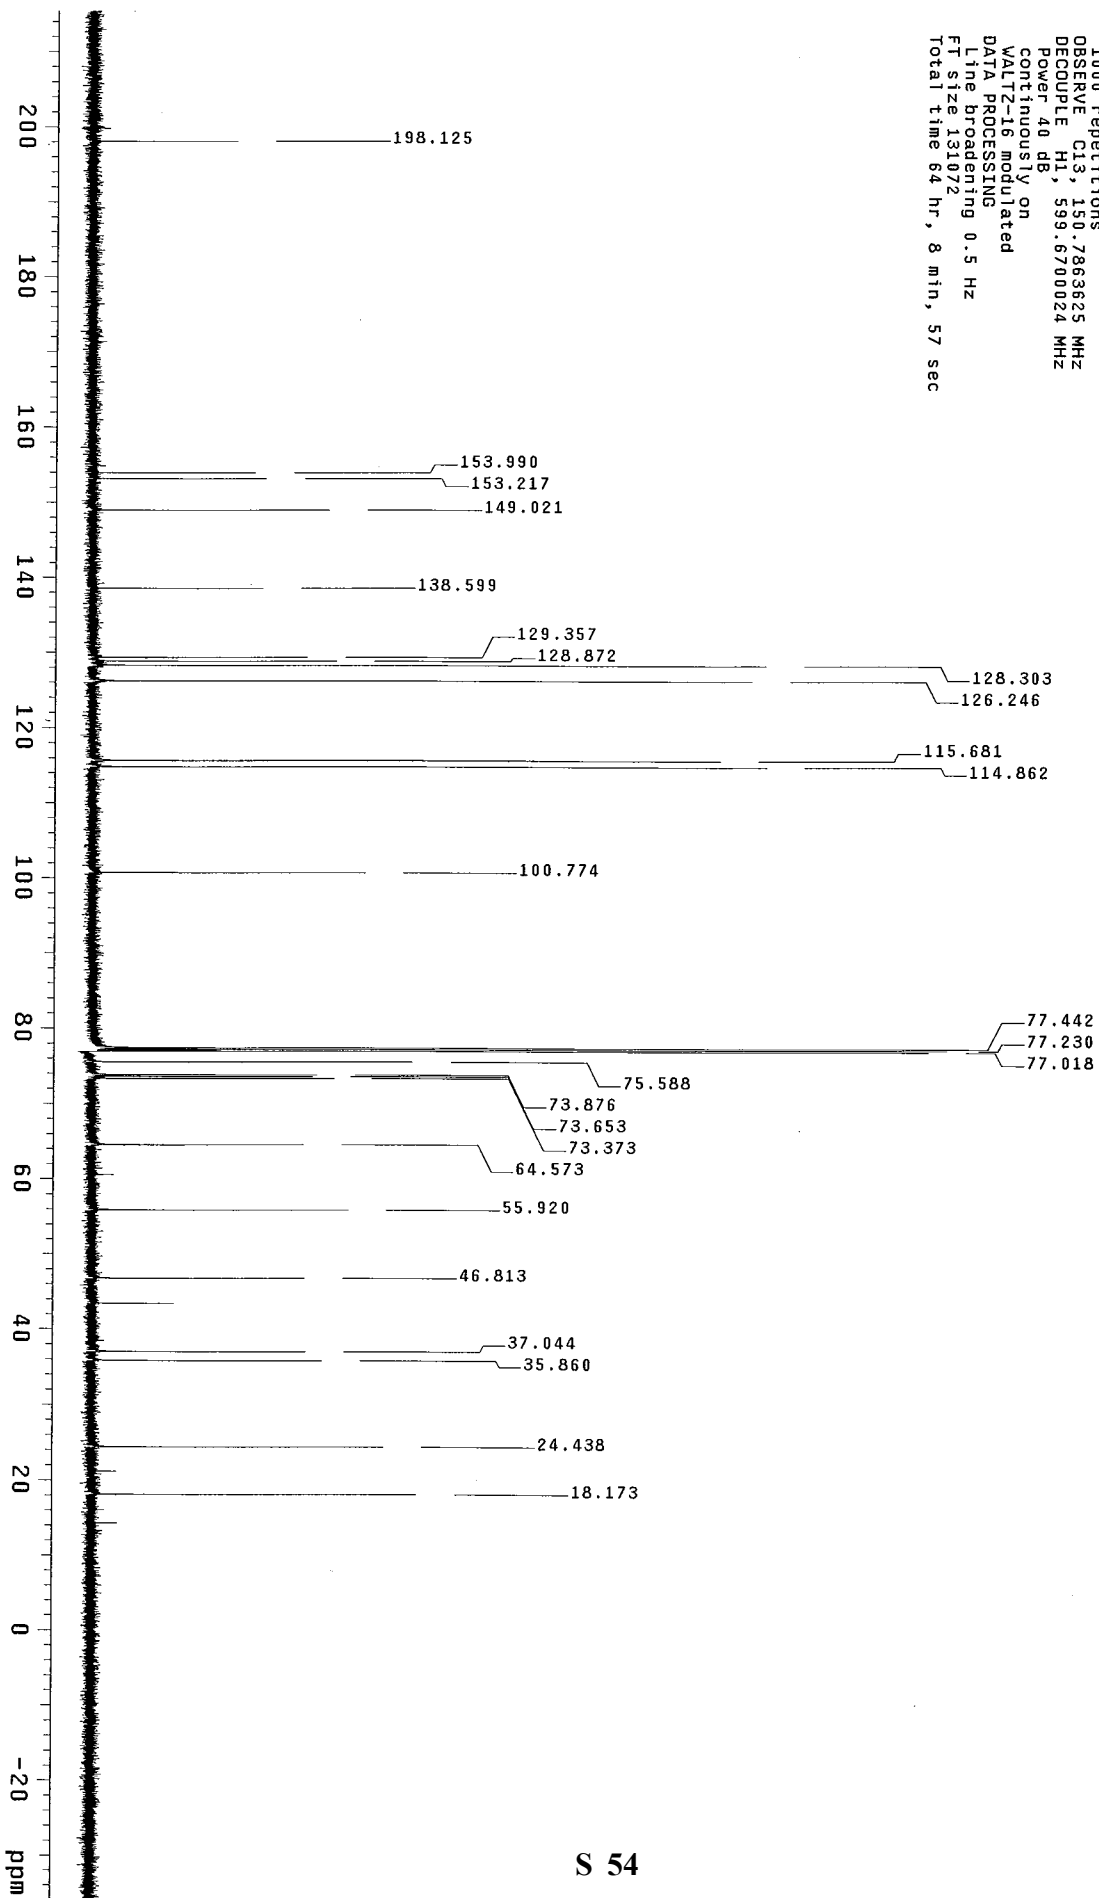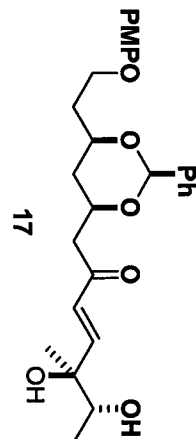

# STANDARD PROTON PARAMETERS

Archive directory: /export/home/vnmr1/vnmrsys/data  
Sample directory:  
File: PROTON

Pulse Sequence: s2pu1

Solvent: CDCl3  
Temp: 28.0 C / 301.1 K  
INNOVA-600 "Inova600"

Relax. delay 1.000 sec  
Pulse 26.9 degrees

Acq. time 1.892 sec  
Width 9594.6 Hz

16 repetitions

OBSERVE H1, 599.6670039 MHz

DATA PROCESSING

line broadening 0.2 Hz

FT size 65536

Total time 0 min, 46 sec

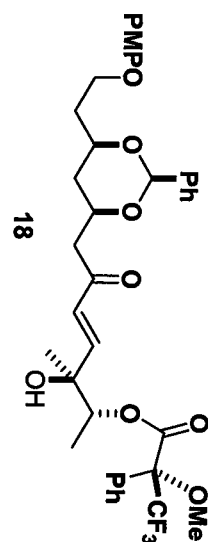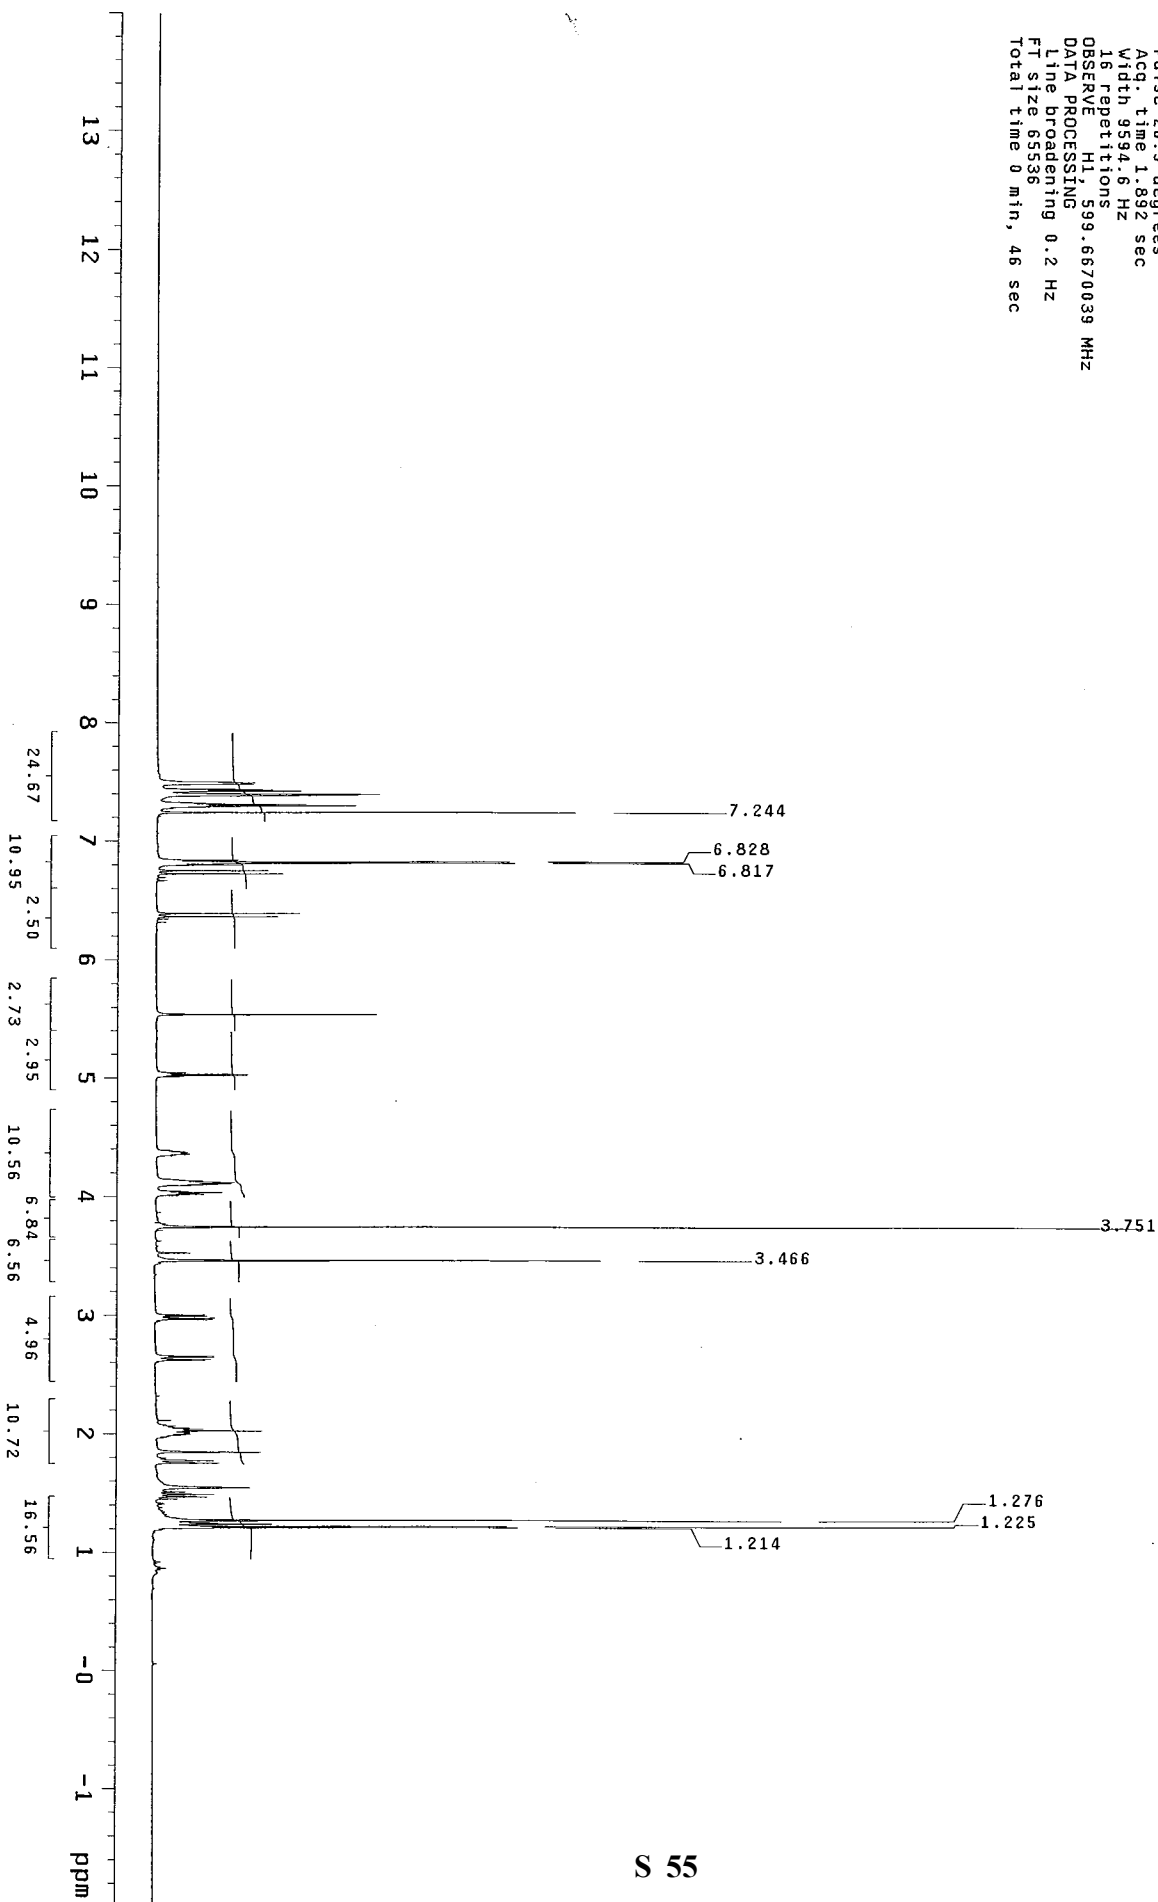

# STANDARD PROTON PARAMETERS

Archive directory: /export/home/vnmr1/vnmrsys/data  
 Sample directory:  
 File: PROTON

Pulse Sequence: s2pu1  
 Solvent: CDCl3  
 Temp: 28.0 C / 301.1 K  
 INOVA-600 "Inova600"

Relax. delay 1.000 sec  
 Pulse 26.9 degrees  
 Acq. time 1.892 sec  
 Width 9594.6 Hz  
 16 repetitions  
 OBSERVE H1, 599.6670039 MHz  
 DATA PROCESSING  
 Line broadening 0.2 Hz  
 FT size 65536  
 Total time 0 min, 46 sec

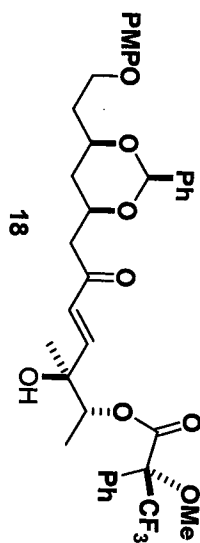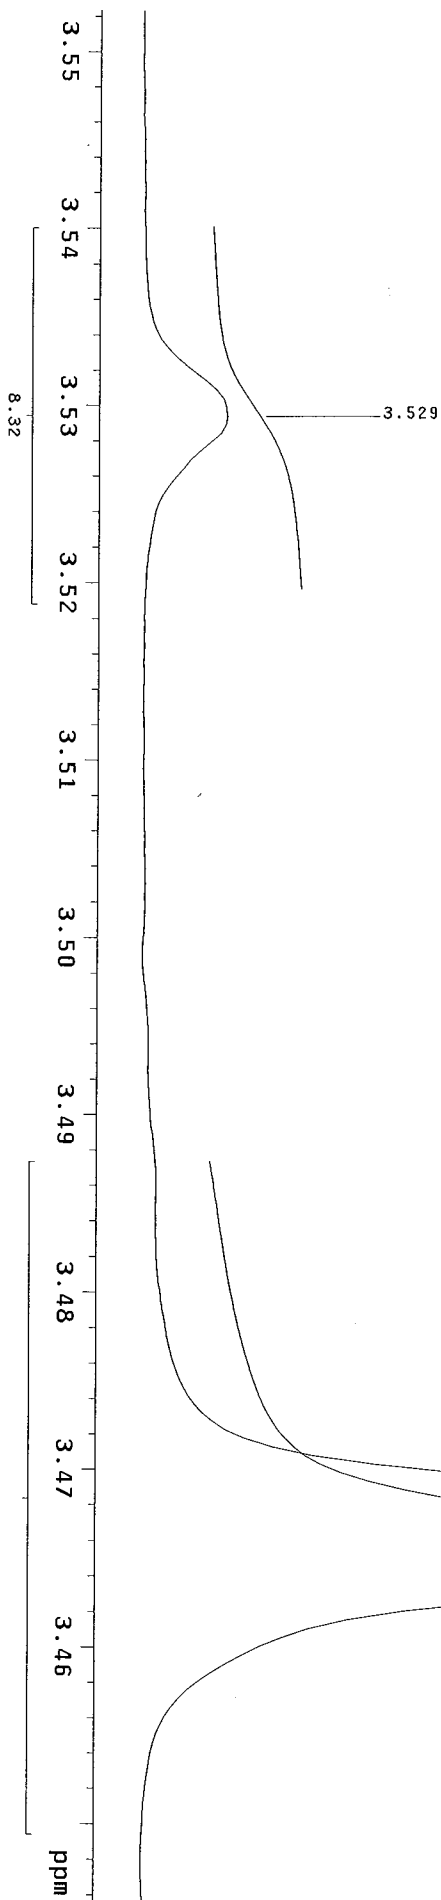

# STANDARD PROTON PARAMETERS

Archive directory: /export/home/vnmr1/vnmrSYS/data  
Sample directory:  
File: PROTON

Pulse Sequence: s2pu1

Solvent: CDCl3  
Temp: 28.0 C / 301.1 K

INNOVA-600 "Innova600"

Relax. delay 1.000 sec

Pulse 26.9 degrees

Acq. time 1.892 sec

Width 9594.6 Hz

16 repetitions

OBSERVE H1, 599.6669891 MHz

DATA PROCESSING

Line broadening 0.2 Hz

FT size 65536

Total time 0 min, 46 sec

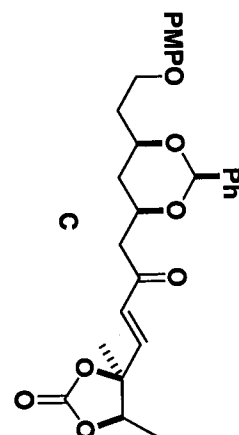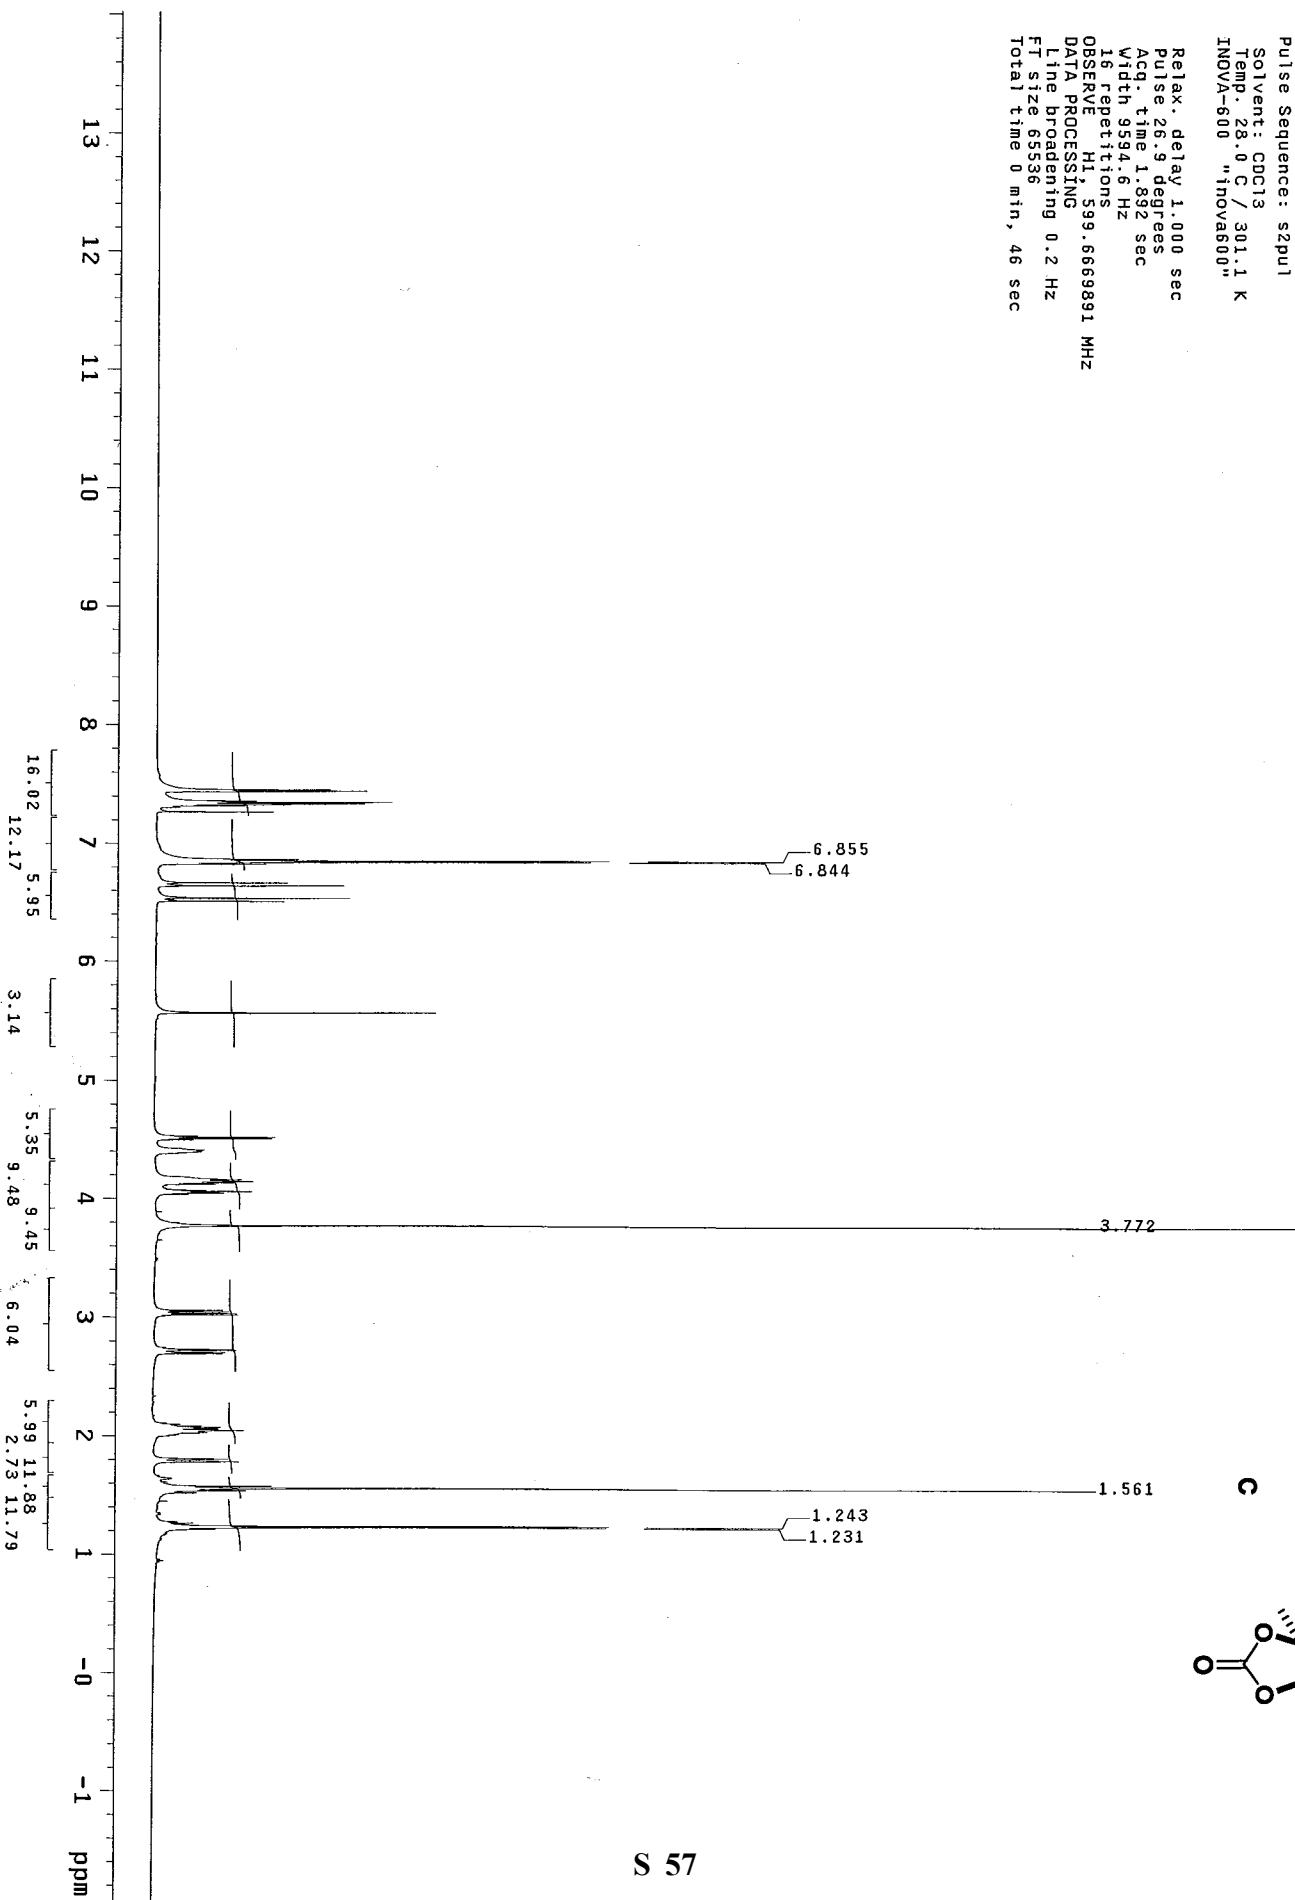

# STANDARD CARBON PARAMETERS

Pulse Sequence: szpul

Solvent: CDCl<sub>3</sub>

Temp: 28.0 C / 301.1 K

User: 1-14-87

INNOVA-600 "inova600"

Relax. delay 1.000 sec

Pulse 36.5 degrees

Acq. time 1.301 sec

Width 38004.8 Hz

344 repetitions

OBSERVE C13, 150.7663584 MHz

DECOUPLE H1, 599.6700024 MHz

Power 40 dB

continuously on

WALTZ-16 modulated

DATA PROCESSING

Line broadening 0.5 Hz

FT size 131072

Total time 6 hr, 24 min, 54 sec

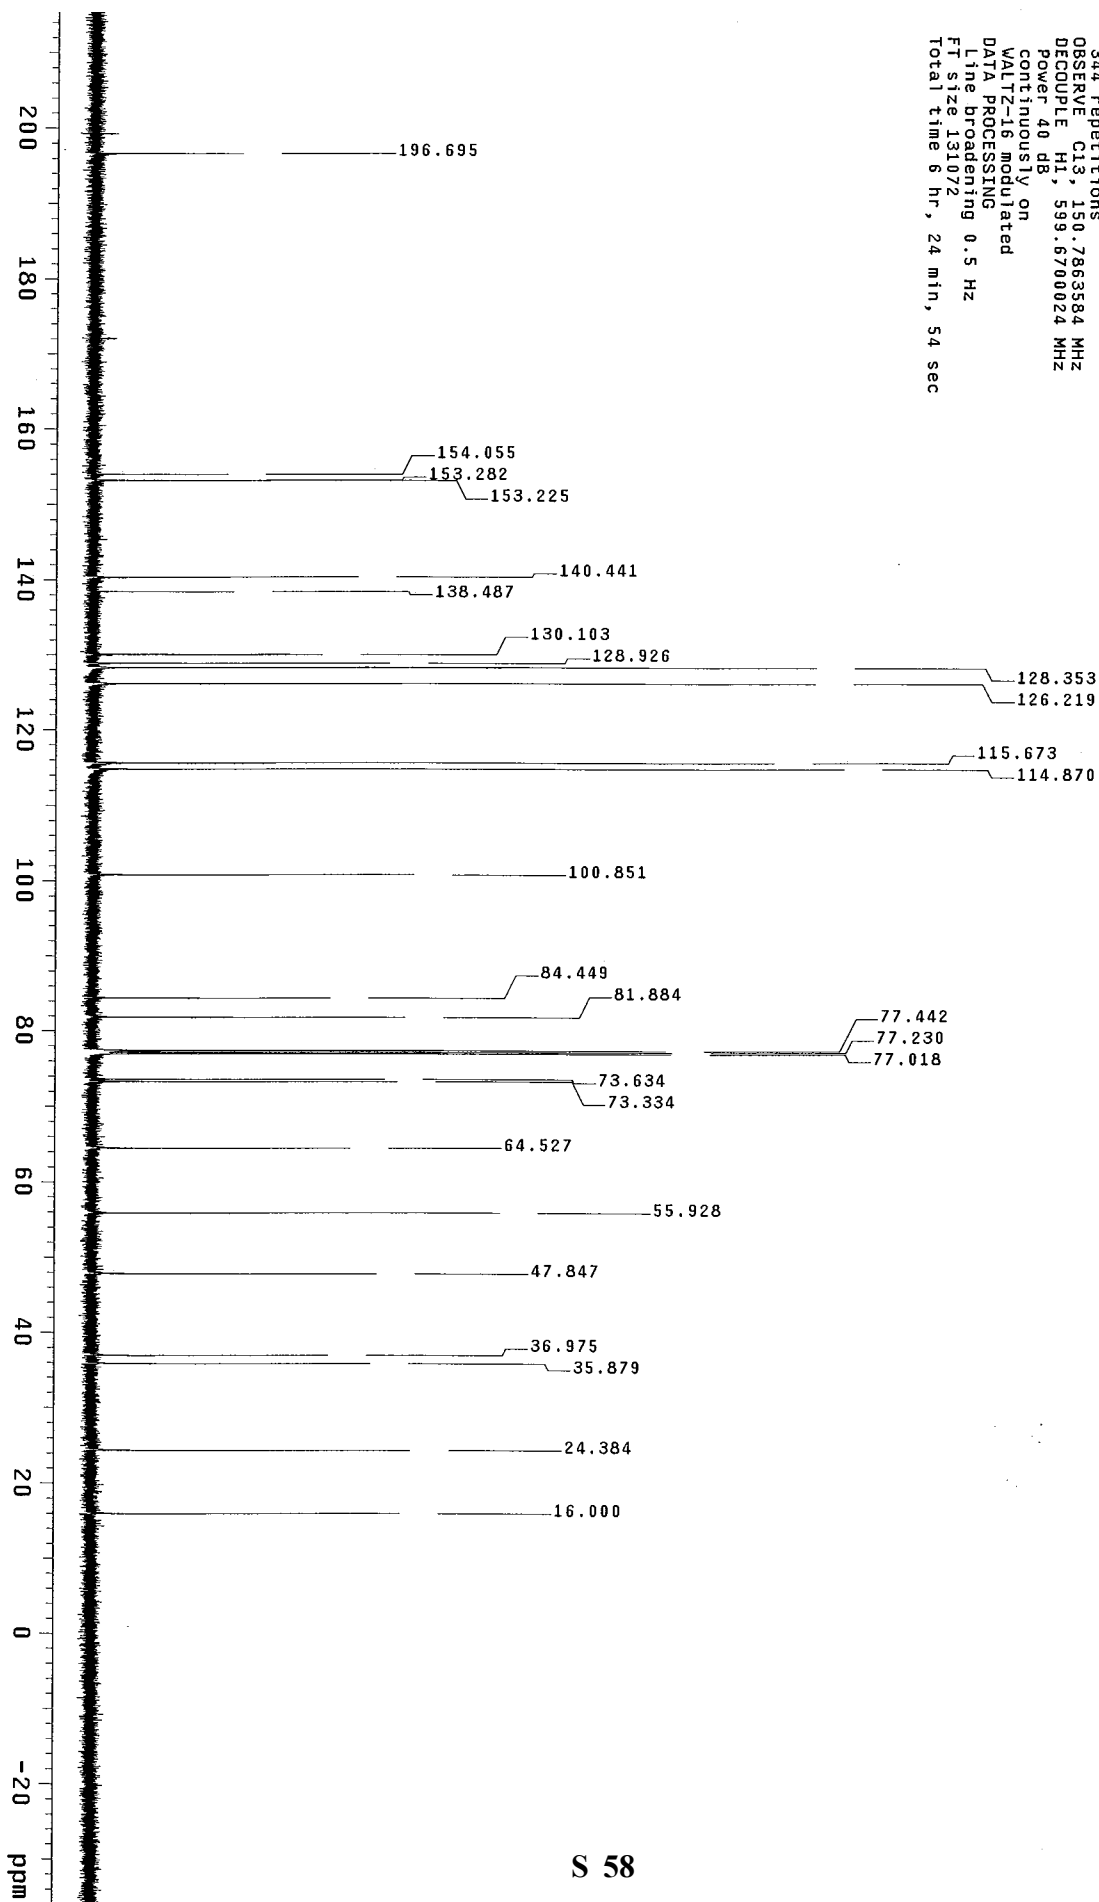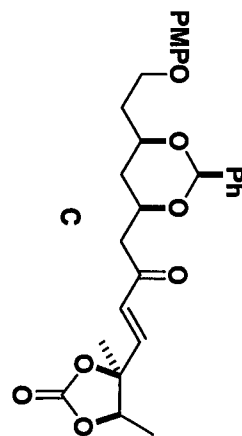

# STANDARD PROTON PARAMETERS

Archive directory: /export/home/vnmr1/vnmrsys/data  
 Sample directory:  
 File: PROTON

Pulse Sequence: s2pu1

Solvent: CDCl3  
 Temp: 28.0 C / 301.1 K  
 INOVA-600 "Inova600"

Relax. delay 1.000 sec  
 Pulse 26.9 degrees

Acq. time 1.892 sec  
 Width 9594.6 Hz

16 repetitions

OBSERVE H1, 599.666891 MHz

DATA PROCESSING

line broadening 0.2 Hz

FT size 65536

Total time 0 min, 46 sec

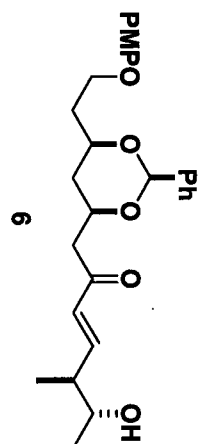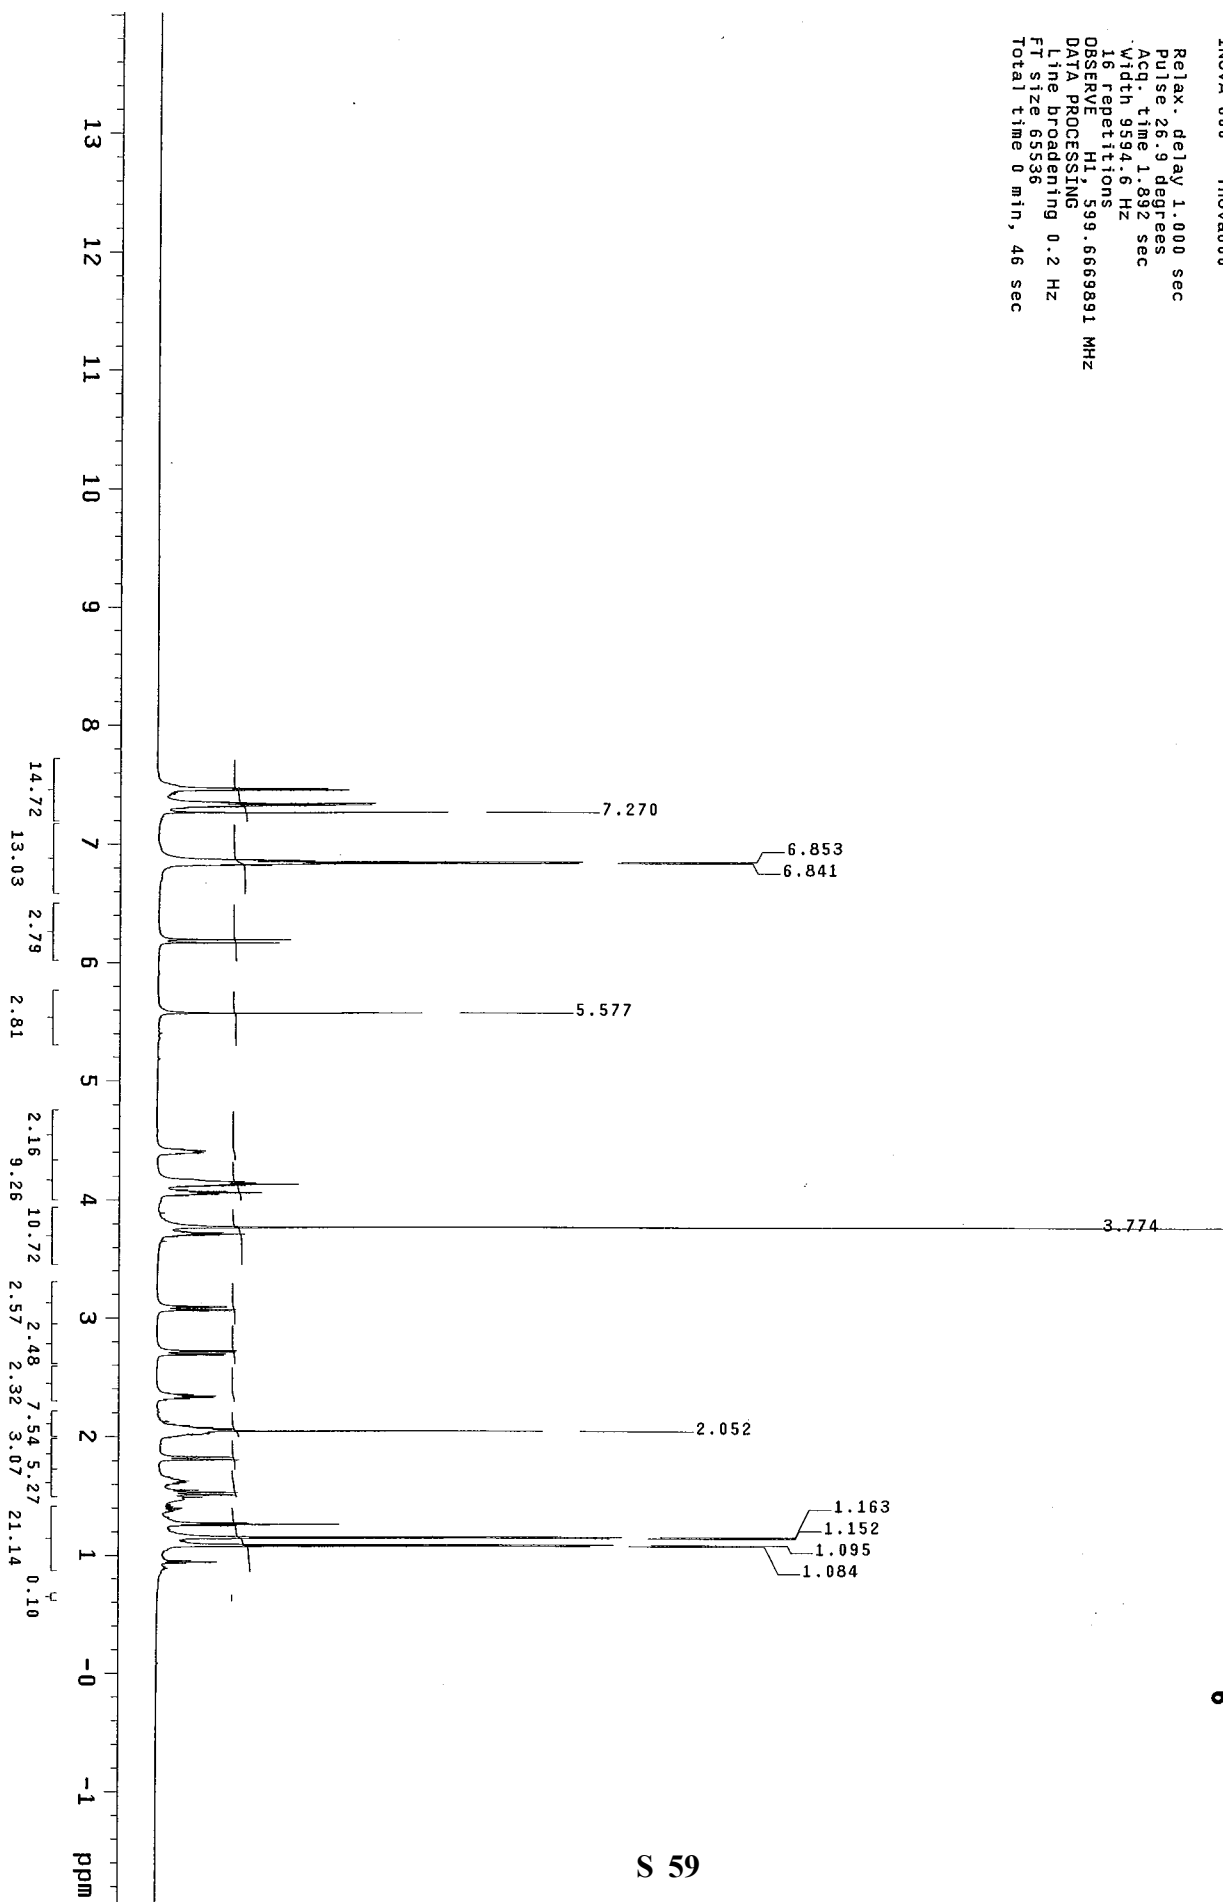

# STANDARD CARBON PARAMETERS

Pulse Sequence: szpul

Solvent: CDCl<sub>3</sub>

Temp: 28.0 C / 301.1 K

User: 1-14-87

INNOVA-600 "Innova600"

Relax. delay 1.000 sec

Pulse 36.5 degrees

Acq. time 1.300 sec

Width 38004.8 Hz

4456 repetitions

OBSERVE C13, 150.7863521 MHz

DECOUPLE H1, 599.6700024 MHz

Power 40 dB

continuously on

WALTZ-16 modulated

DATA PROCESSING

Line broadening 0.5 Hz

FT size 131072

Total time 641 hr, 29 min, 32 sec

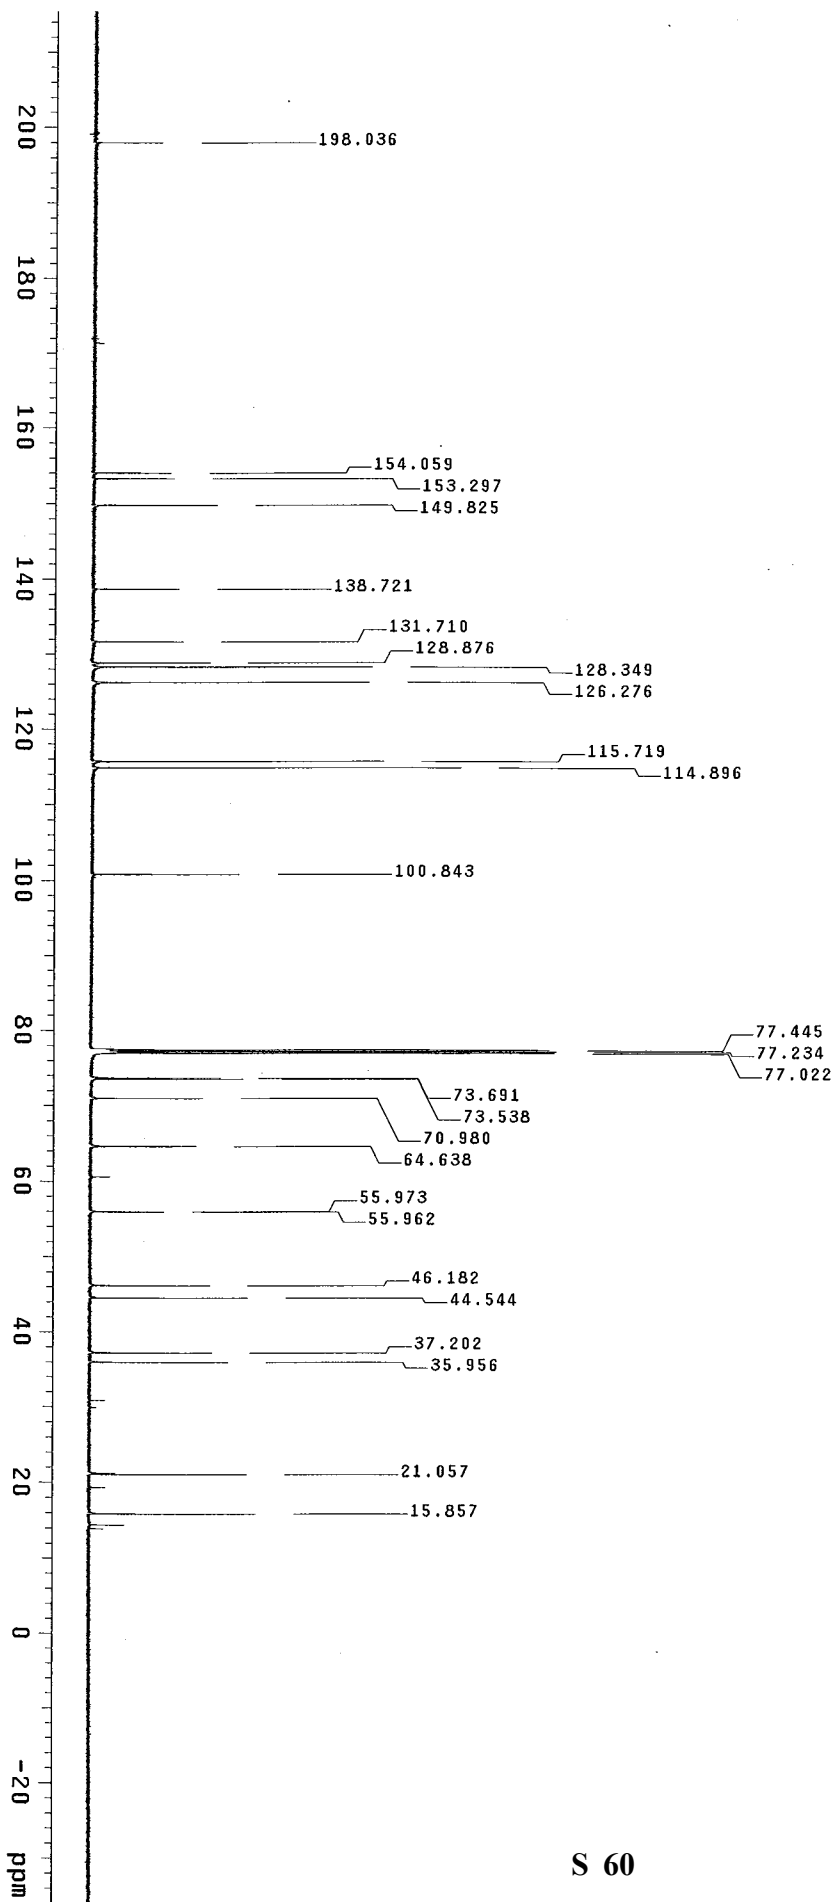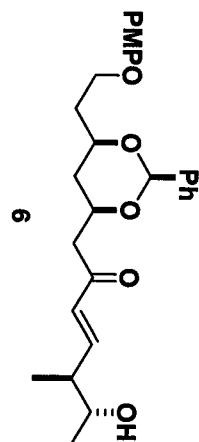

# STANDARD PROTON PARAMETERS

Archive directory: /export/home/vnmr1/vnmrsys/data  
Sample directory:  
File: PROTON

Pulse Sequence: s2pu1

Solvent: CDCl3  
Temp: 28.0 C / 301.1 K  
INNOVA-600 "Inova600"

Relax. delay 1.000 sec  
Pulse 26.9 degrees

Acq. time 1.892 sec  
Width 9594.6 Hz

16 repetitions

OBSERVE H1, 599.6669882 MHz

DATA PROCESSING

line broadening 0.2 Hz

FT size 65536

Total time 0 min, 46 sec

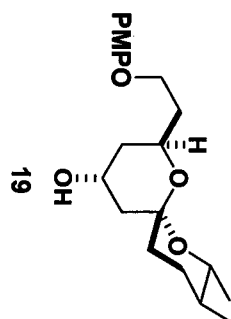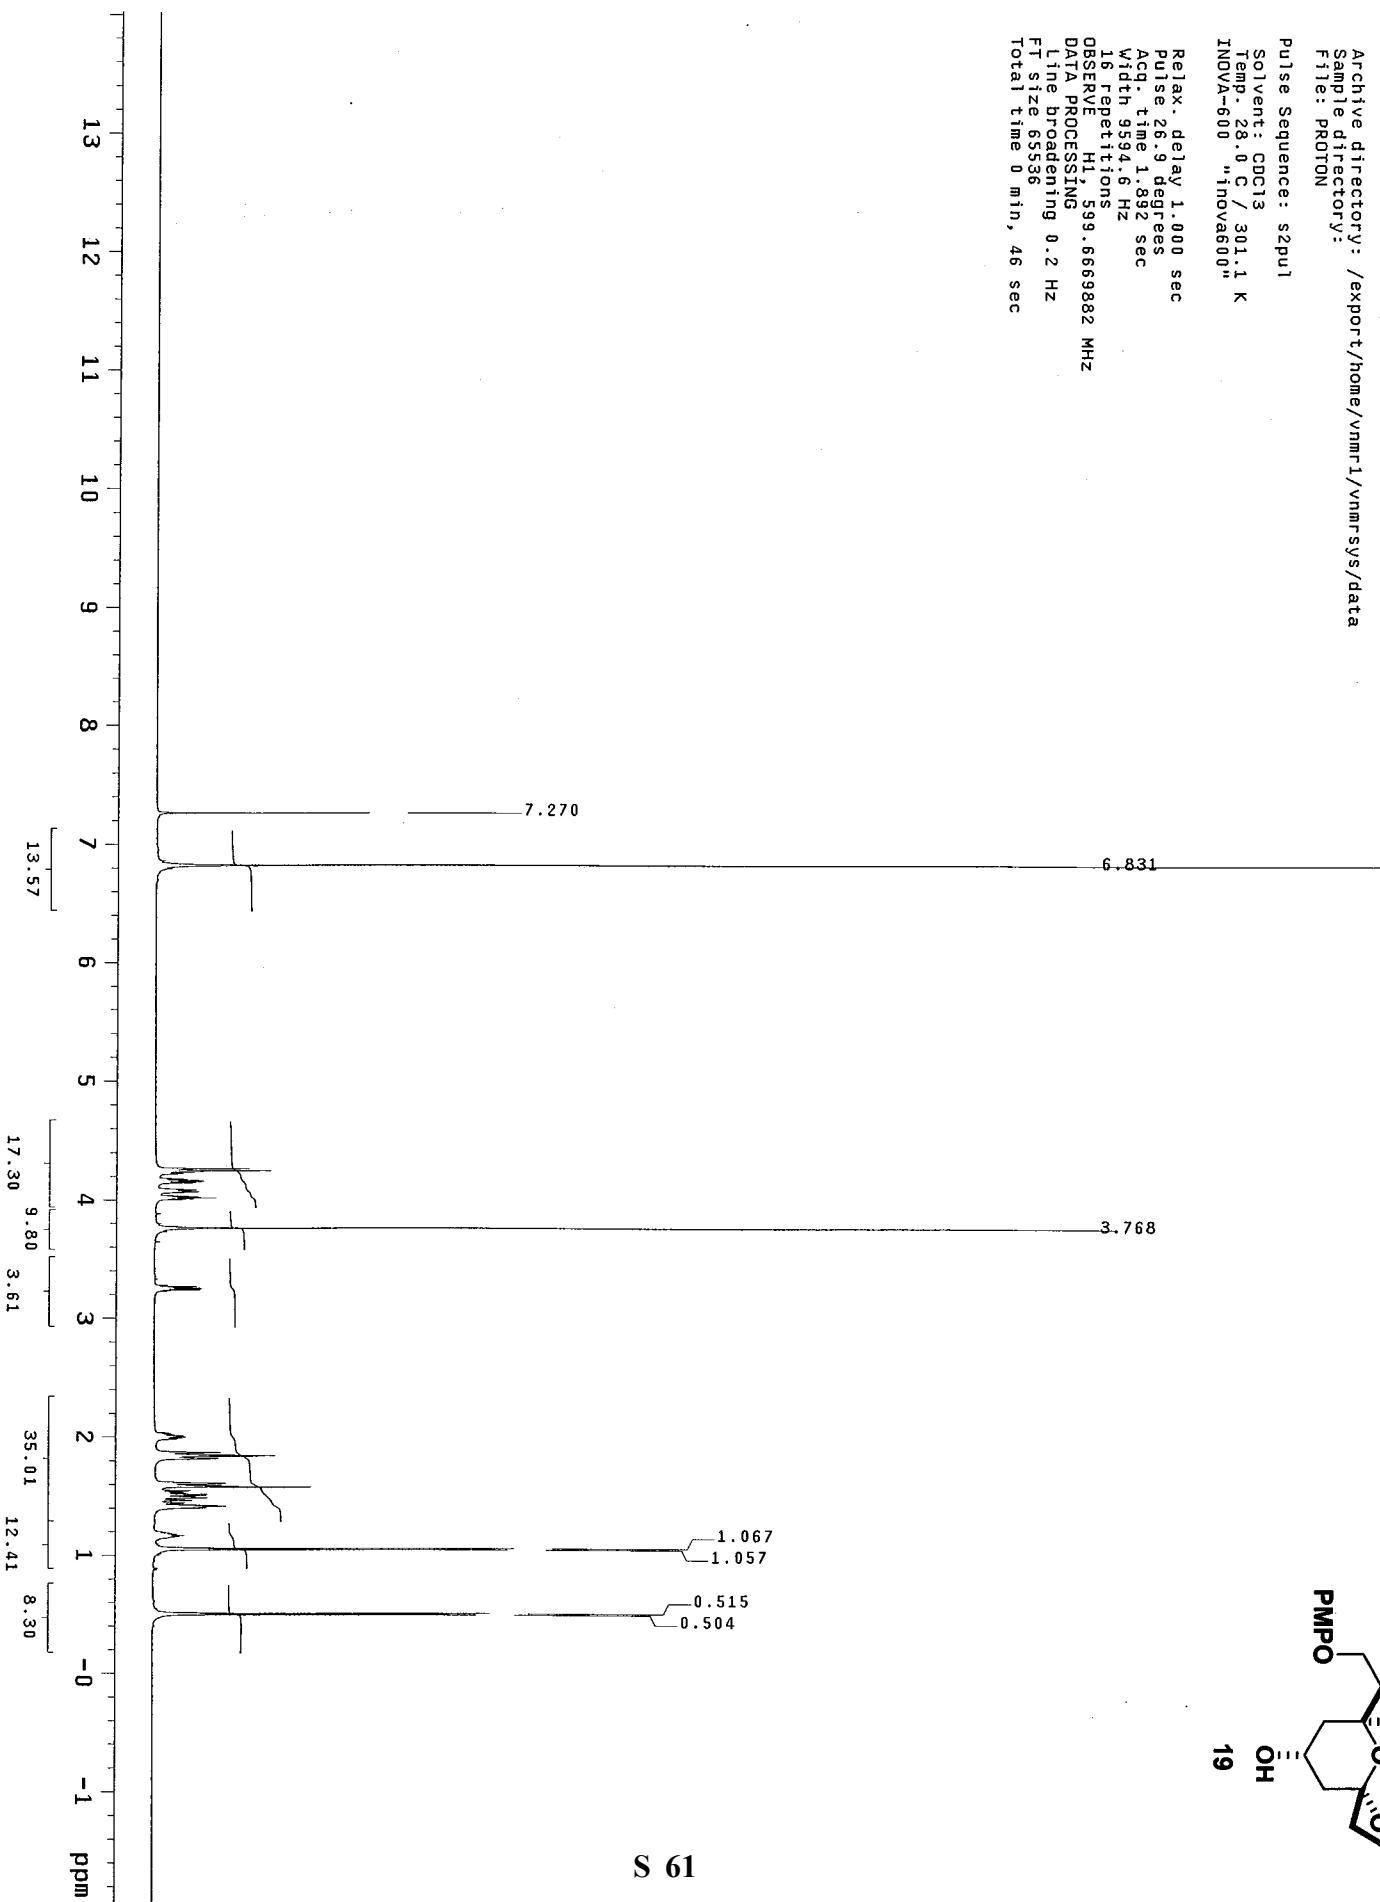

STANDARD CARBON PARAMETERS

Pulse Sequence: s2pu1

Solvent: CDCl3

Temp: 28.0 C / 301.1 K

User: 1-14-87

INOVA-600 "inova600"

Relax. delay 1.000 sec

Pulse 36.5 degrees

Acq. time 1.300 sec

Width 38004.8 Hz

19232 repetitions

OBSERVE C13, 150.7863485 MHz

DECOUPLE H1, 599.6700024 MHz

Power 40 dB

continuously on

WALTZ-16 modulated

DATA PROCESSING

Line broadening 0.5 Hz

FT size 131072

Total time 6414 hr, 55 min, 20 sec

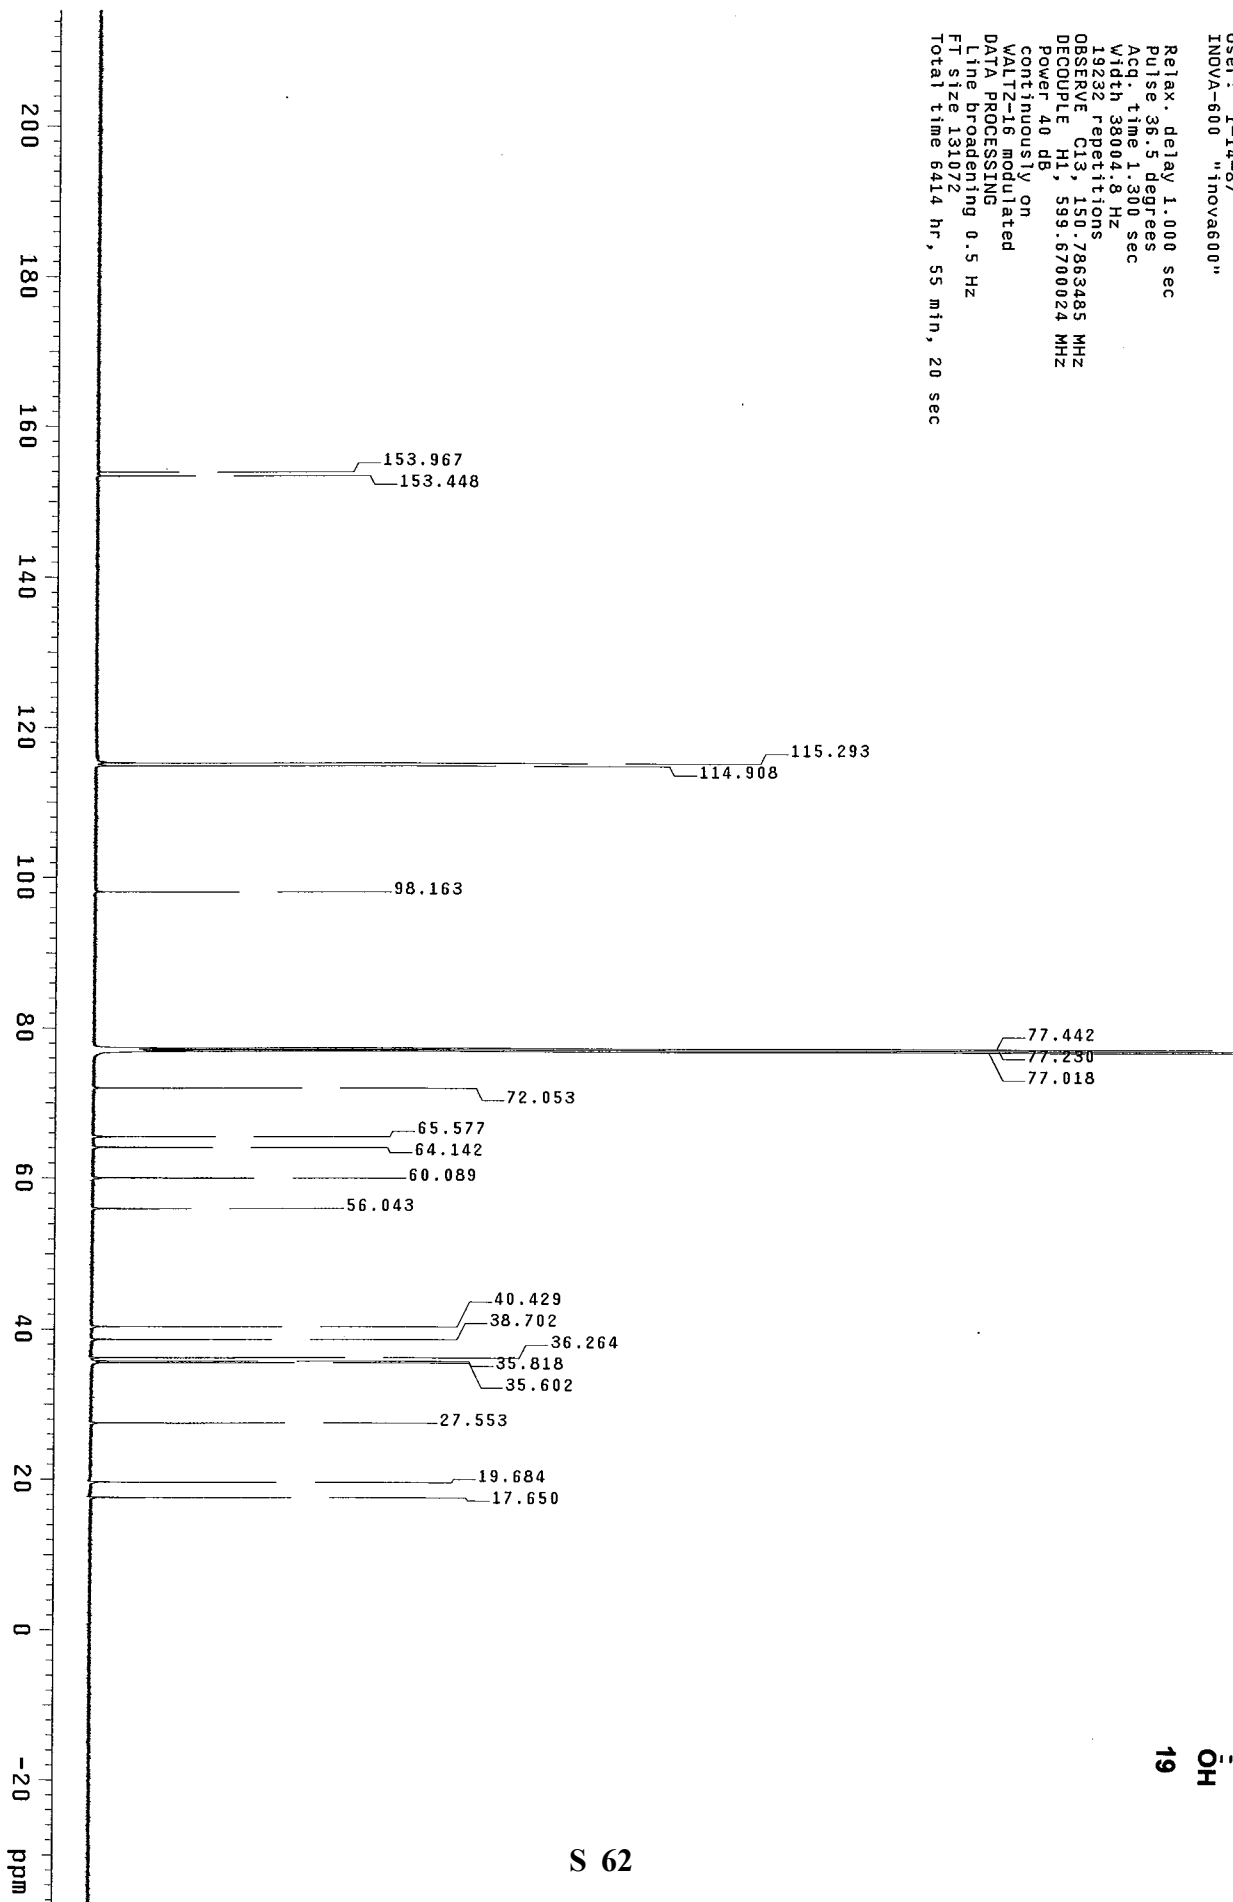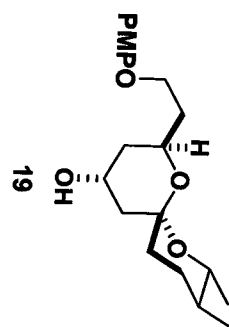

# STANDARD PROTON PARAMETERS

Archive directory: /export/home/vnmr1/vnmrsys/data  
 Sample directory:  
 File: PROTON

Pulse Sequence: s2pu1

Solvent: CDCl3  
 Temp: 28.0 C / 301.1 K  
 INOVA-600 "Inova600"

Relax. delay 1.000 sec

Pulse 26.9 degrees

Acq. time 1.892 sec

Width 9594.6 Hz

16 repetitions

OBSERVE H1, 599.669888 MHz

DATA PROCESSING

Line broadening 0.2 Hz

FI size 65536

Total time 0 min, 46 sec

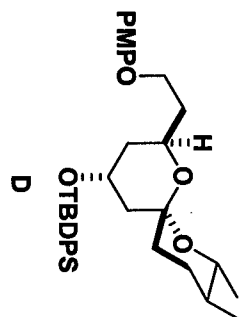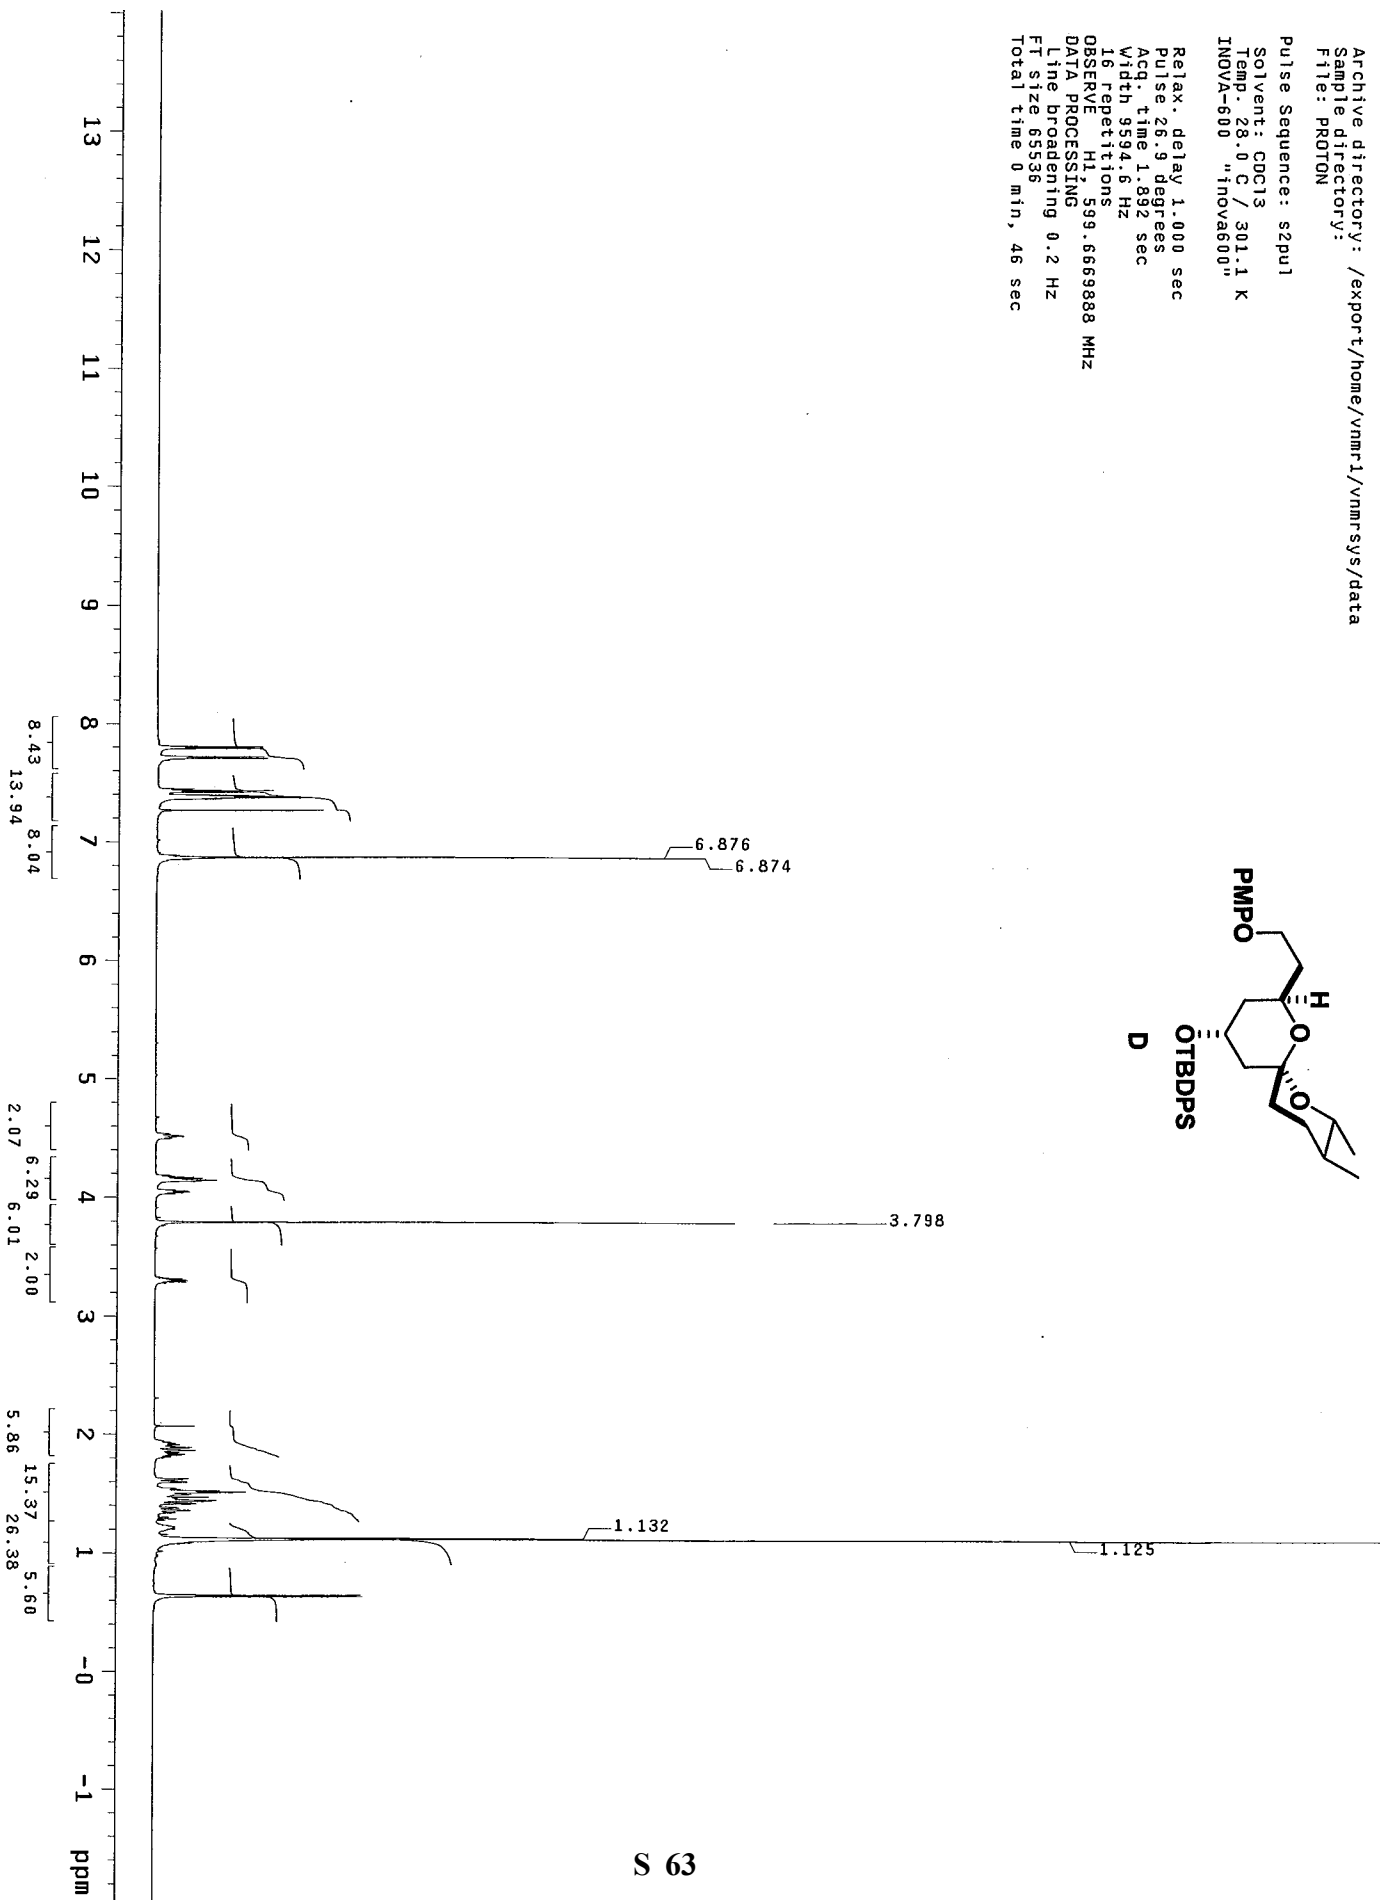

# STANDARD CARBON PARAMETERS

Pulse Sequence: szpu1

Solvent: CDCl3

Temp: 28.0 C / 301.1 K

User: 1-14-87

INOVA-600 "inova600"

Relax. delay 1.000 sec

Pulse 36.5 degrees

Acq. time 1.300 sec

Width 38004.8 Hz

280 repetitions

OBSERVE C13, 150.786355 MHz

DECOUPLE H1, 599.670024 MHz

Power 40 dB

continuously on

WALTZ-16 modulated

DATA PROCESSING

line broadening 0.5 Hz

FT size 131072

Total time 64 hr, 8 min, 57 sec

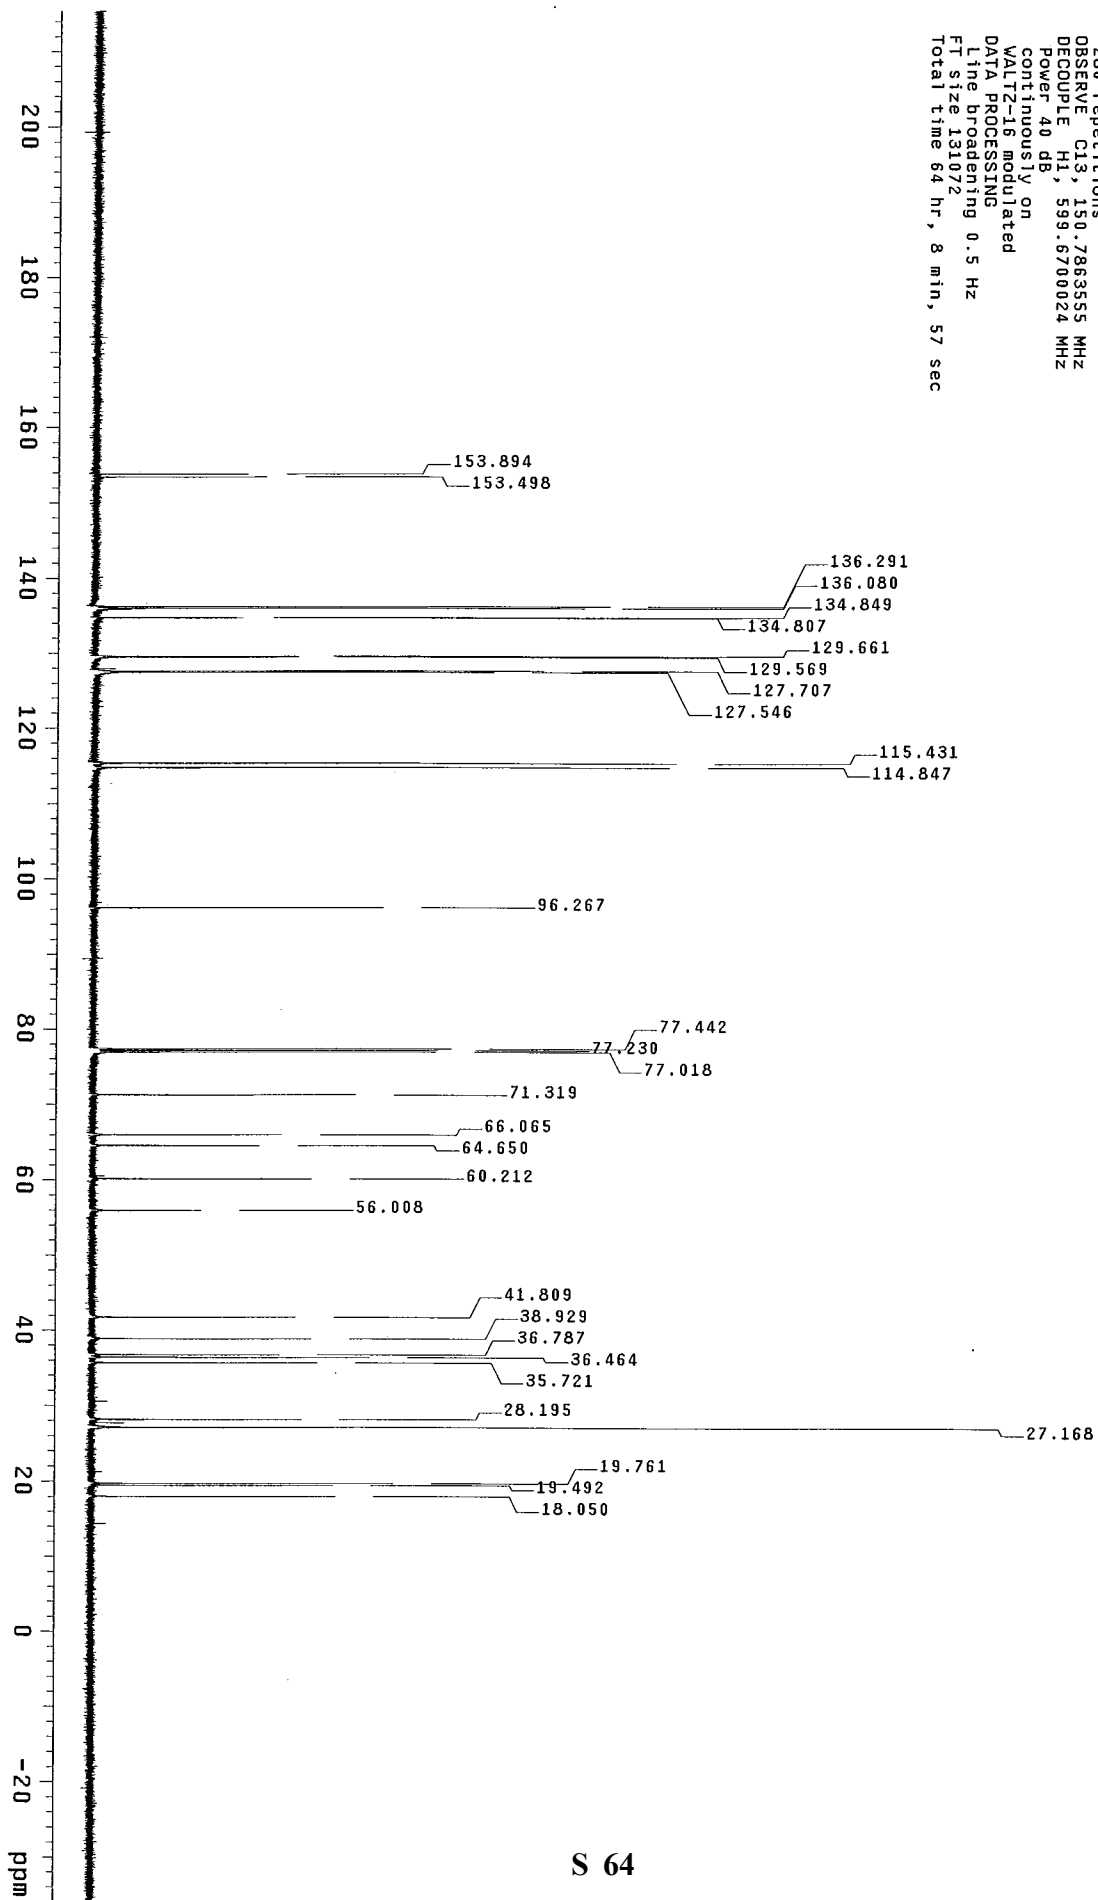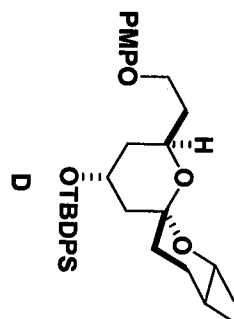

# STANDARD PROTON PARAMETERS

Archive directory: /export/home/vnmr1/vnmrSYS/data  
 Sample directory:  
 File: PROTON

Pulse Sequence: s2pu1

Solvent: CDCl3

Temp: 28.0 C / 301.1 K

INNOVA-600 "Inova600"

Relax. delay 1.000 sec

Pulse 26.9 degrees

Acq. time 1.892 sec

Width 9594.6 Hz

16 repetitions

OBSERVE H1, 599.6669891 MHz

DATA PROCESSING

line broadening 0.2 Hz

FT size 65536

Total time 0 min, 46 sec

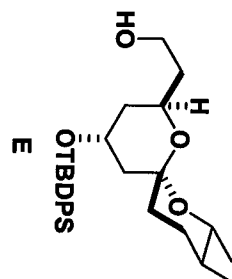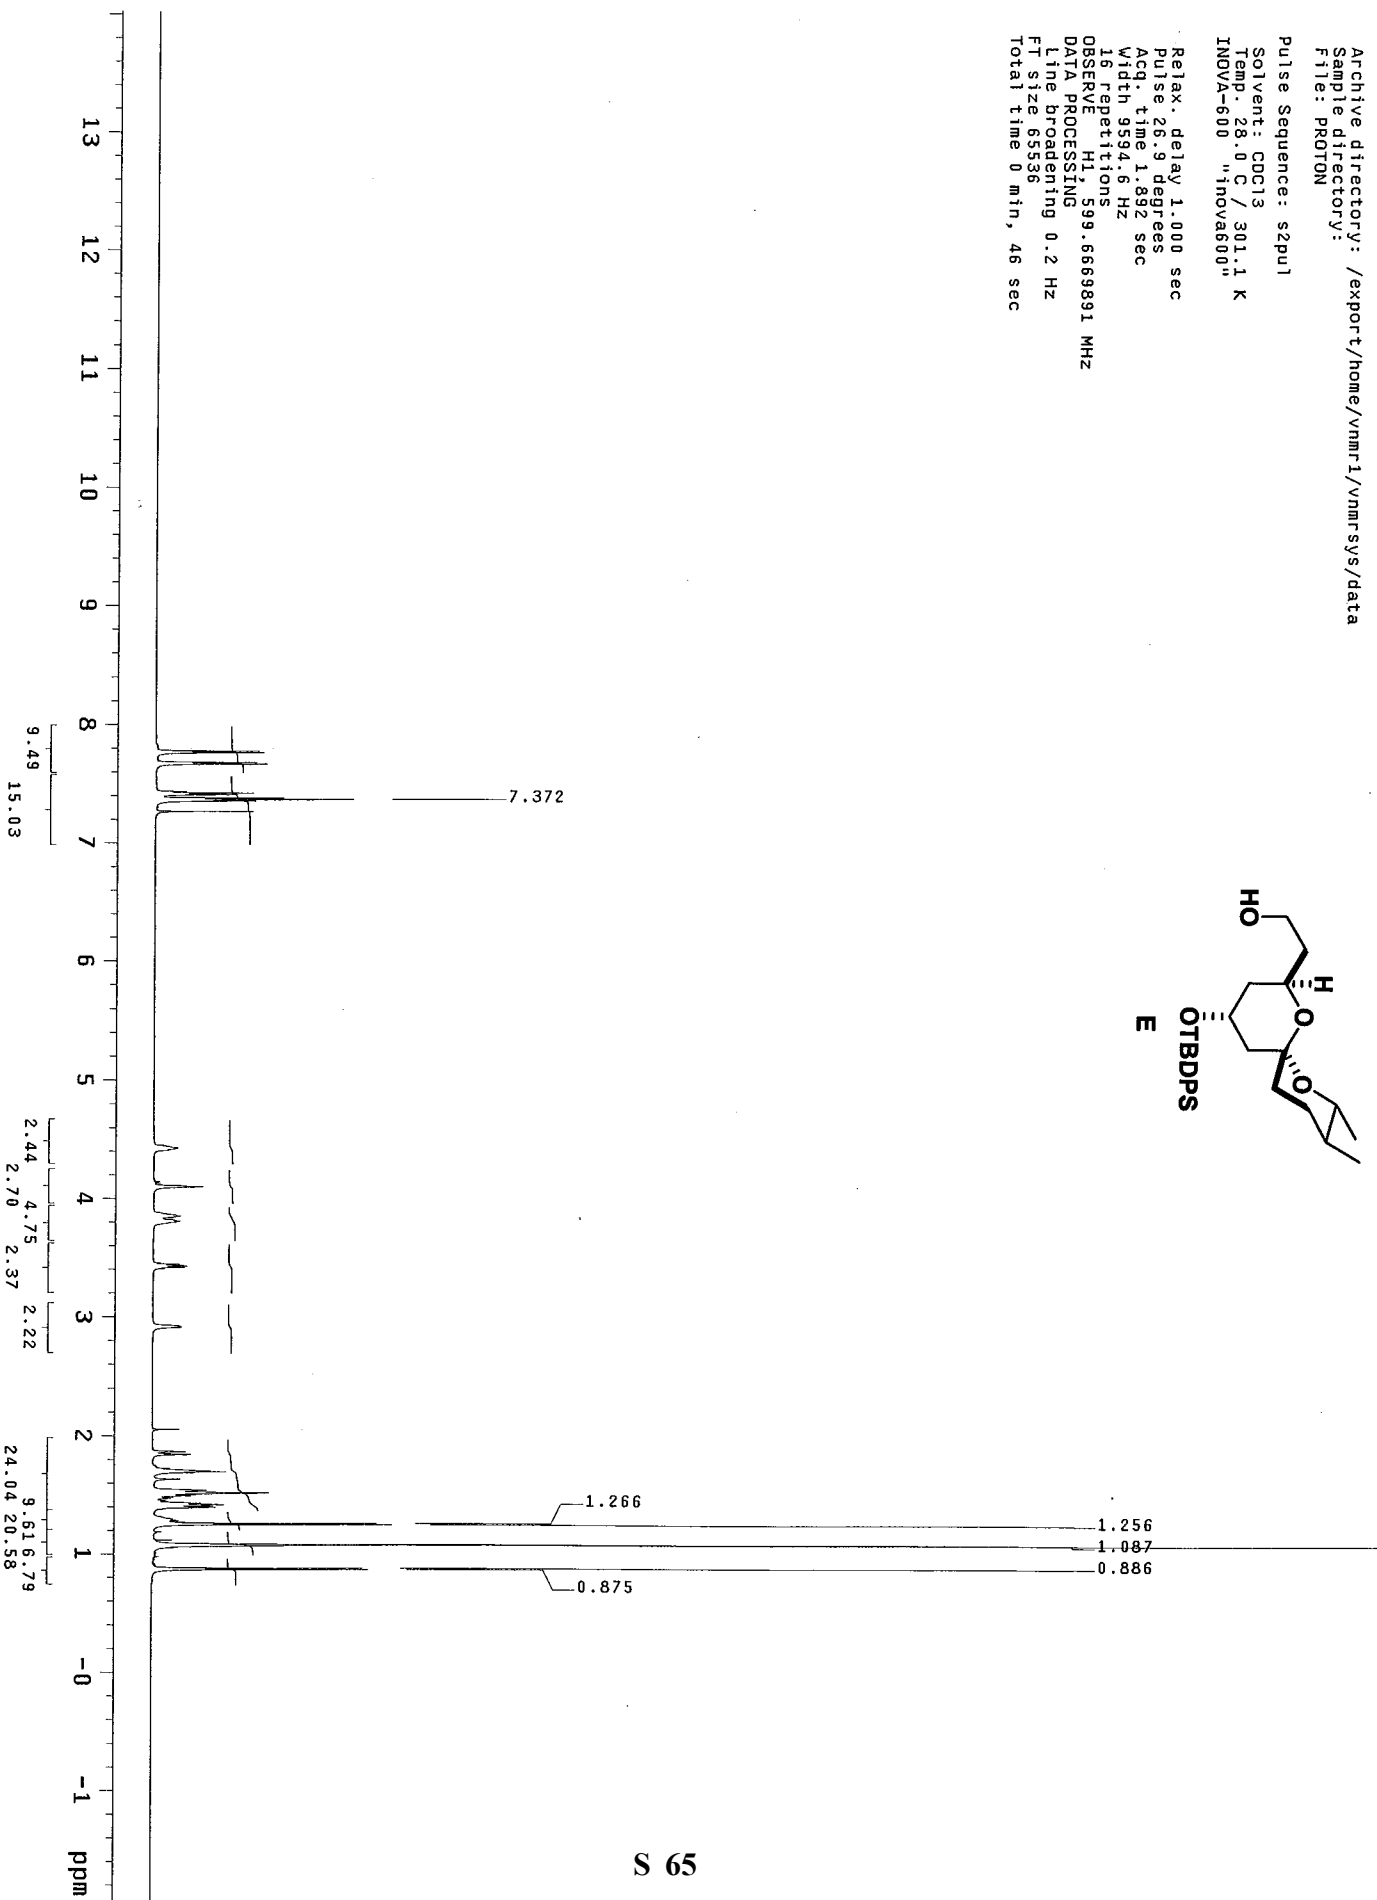

# STANDARD CARBON PARAMETERS

Pulse Sequence: szpul

Solvent: CDC13

Temp: 28.0 C / 301.1 K

User: 1-14-87

INNOVA-600 "innova600"

Relax. delay 1.000 sec

Pulse 36.5 degrees

Acq. time 1.300 sec

Width 38004.8 Hz

360 repetitions

OBSERVE C13, 150.7663509 MHz

DECOUPLE H1, 599.6700024 MHz

Power 40 dB

continuously on

WALTZ-16 modulated

DATA PROCESSING

Line broadening 0.5 Hz

FT size 131072

Total time 6 hr, 24 min, 53 sec

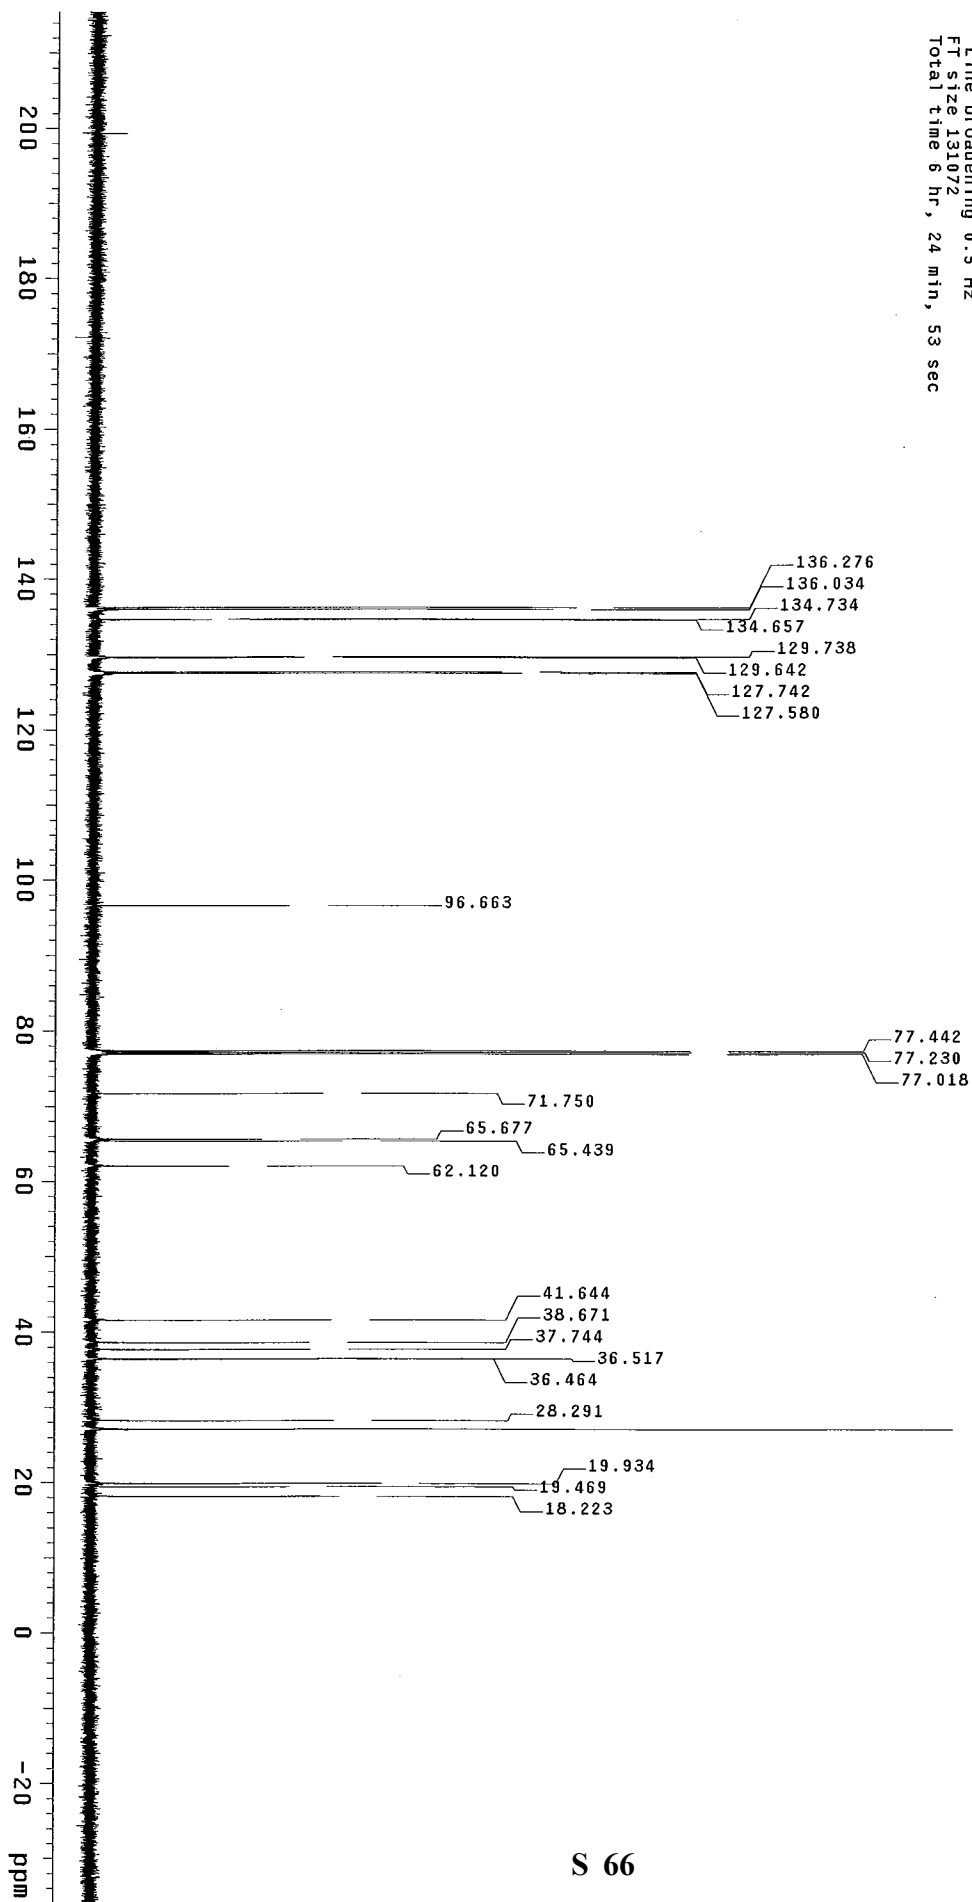

# STANDARD PROTON PARAMETERS

Archive directory: /export/home/vnmr1/vnmrSYS/data  
Sample directory:  
File: PROTON

Pulse Sequence: s2pu1  
Solvent: CDCl3  
Temp: 28.0 C / 301.1 K  
INNOVA-600 "Inova600"

Relax. delay 1.000 sec  
Pulse 30.0 degrees  
Acq. time 4.00 sec  
Width 9594.6 Hz  
16 repetitions

OBSERVE H1 599.6670075 MHz  
DATA PROCESSING  
Line broadening 0.2 Hz  
Ft size 131072  
Total time 1 min, 20 sec

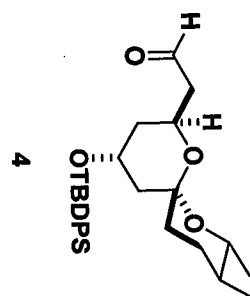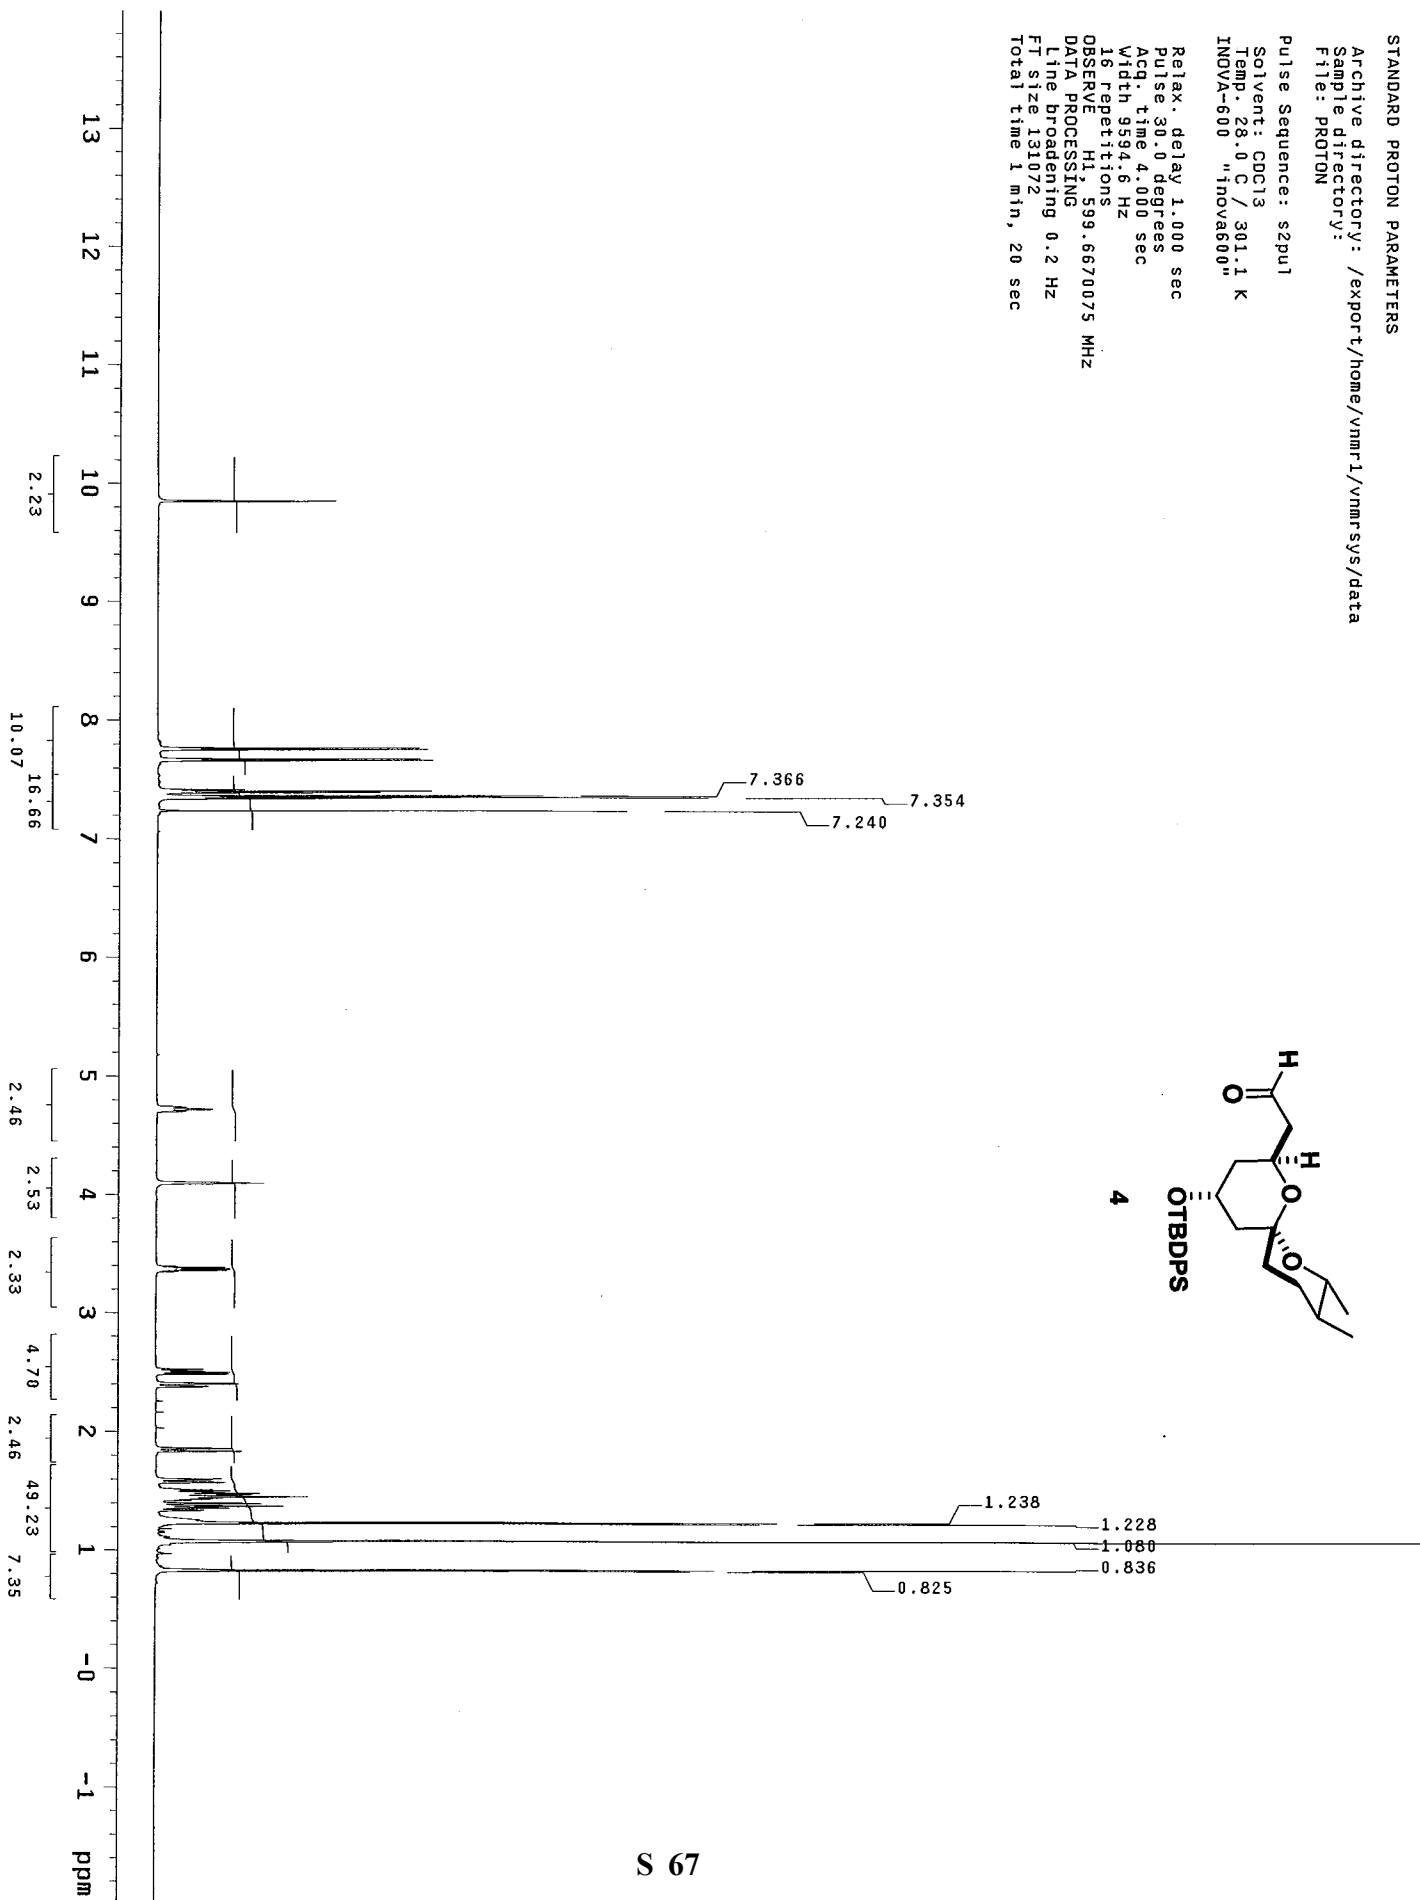

# STANDARD CARBON PARAMETERS

Pulse Sequence: szpul

Solvent: CDC13

Temp: 28.0 C / 301.1 K

User: 1-14-87

INDVA-600 "Inova600"

Relax. delay 1.000 sec

Pulse 36.5 degrees

Acq. time 1.300 sec

Width 38004.8 Hz

408 repetitions

OBSERVE C13, 150.786355 MHz

DECOUPLE H1, 599.670024 MHz

Power 40 dB

continuously on

WALTZ-16 modulated

DATA PROCESSING

Line broadening 0.5 Hz

Fit size 131072

Total time 6 hr, 24 min, 53 sec

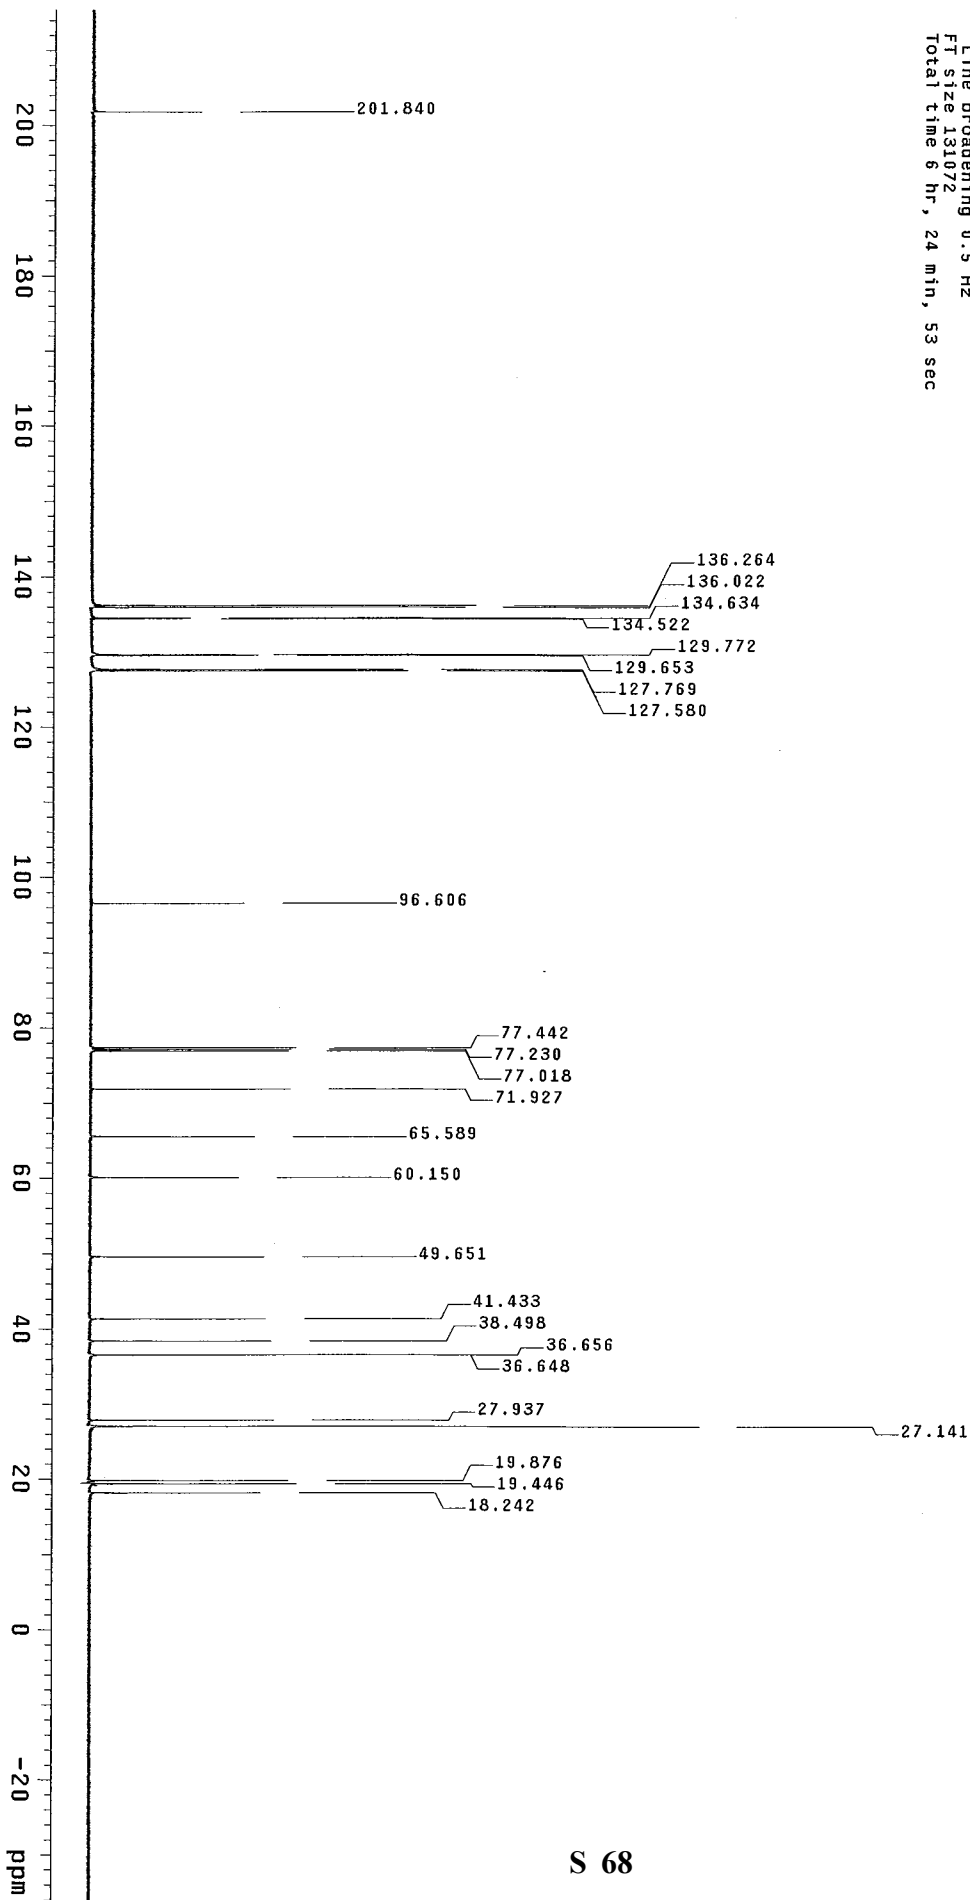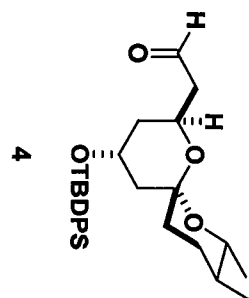

# STANDARD PROTON PARAMETERS

Archive directory: /export/home/vnmr1/vnmrSYS/data  
Sample directory:  
File: PROTON

Pulse Sequence: s2pu1

Solvent: CDCl3  
Temp. 28.0 C / 301.1 K  
INNOVA-600 "Innova600"

Relax. delay 1.000 sec  
Pulse 30.0 degrees

Acq. time 4.00 sec

Width 9594.6 Hz

16 repetitions

OBSERVE H1, 599.6670075 MHz

DATA PROCESSING

Line broadening 0.2 Hz

FT size 131072

Total time 1 min, 20 sec

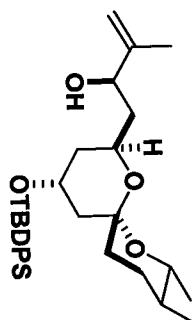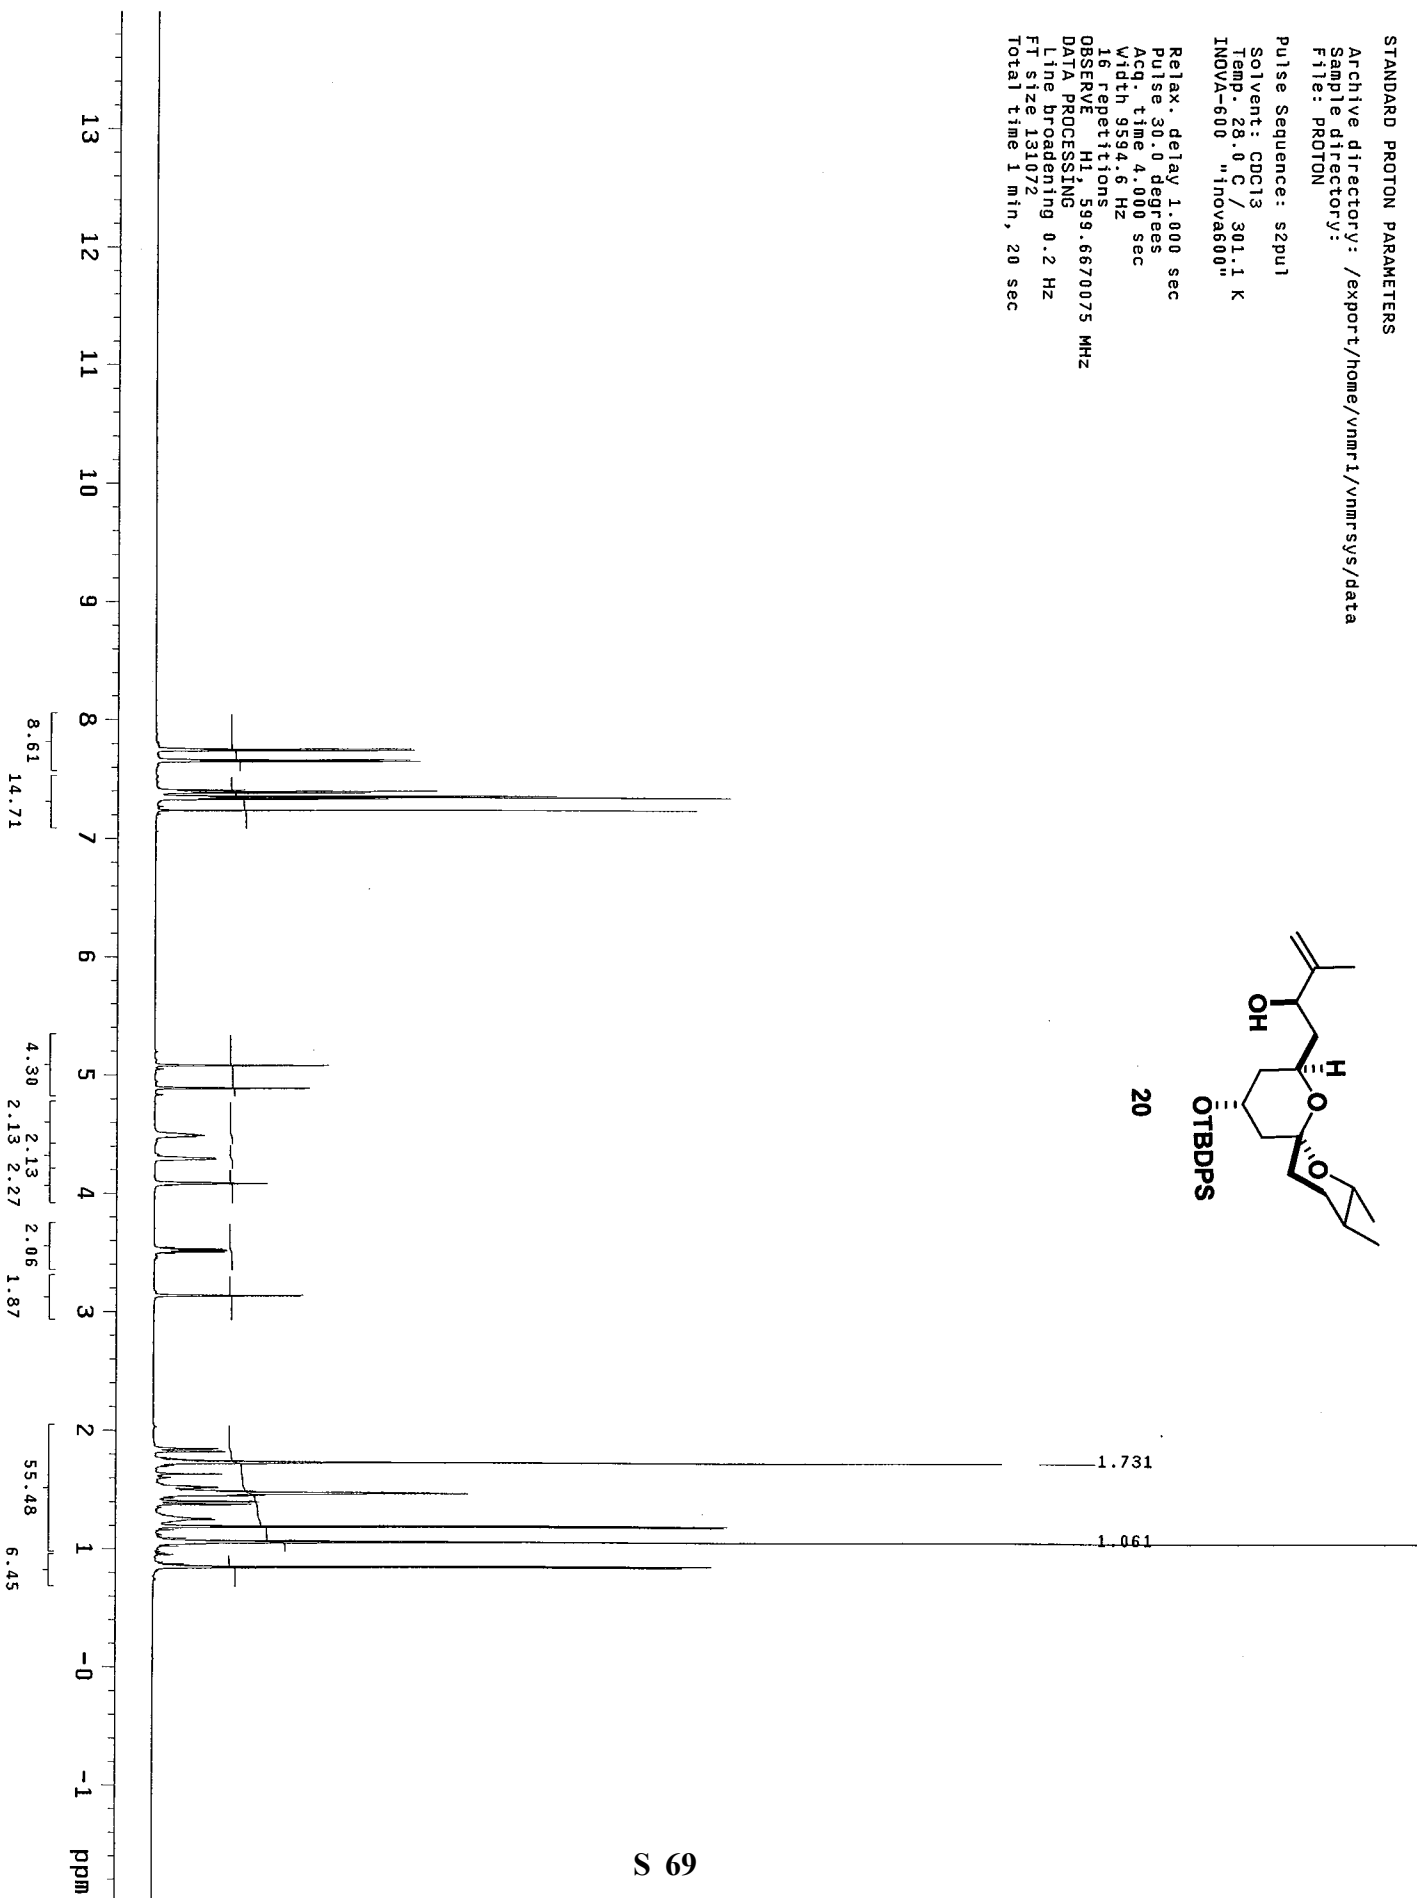

STANDARD CARBON PARAMETERS

Pulse Sequence: s2pu1

Solvent: CDCl<sub>3</sub>

Temp: 28.0 C / 301.1 K

User: 1-14-87

INNOVA-600 "Innova600"

Relax. delay 1.000 sec

Pulse 32.7 degrees

Acq. time 1.300 sec

Width 38004.8 Hz

216 repetitions

OBSERVE C13, 150.7863523 MHz

DECOUPLE H1, 599.6700024 MHz

Power 40 dB

continuously on

WALTZ-16 modulated

DATA PROCESSING

Line broadening 1.0 Hz

FT size 131072

Total time 6 hr, 24 min, 53 sec

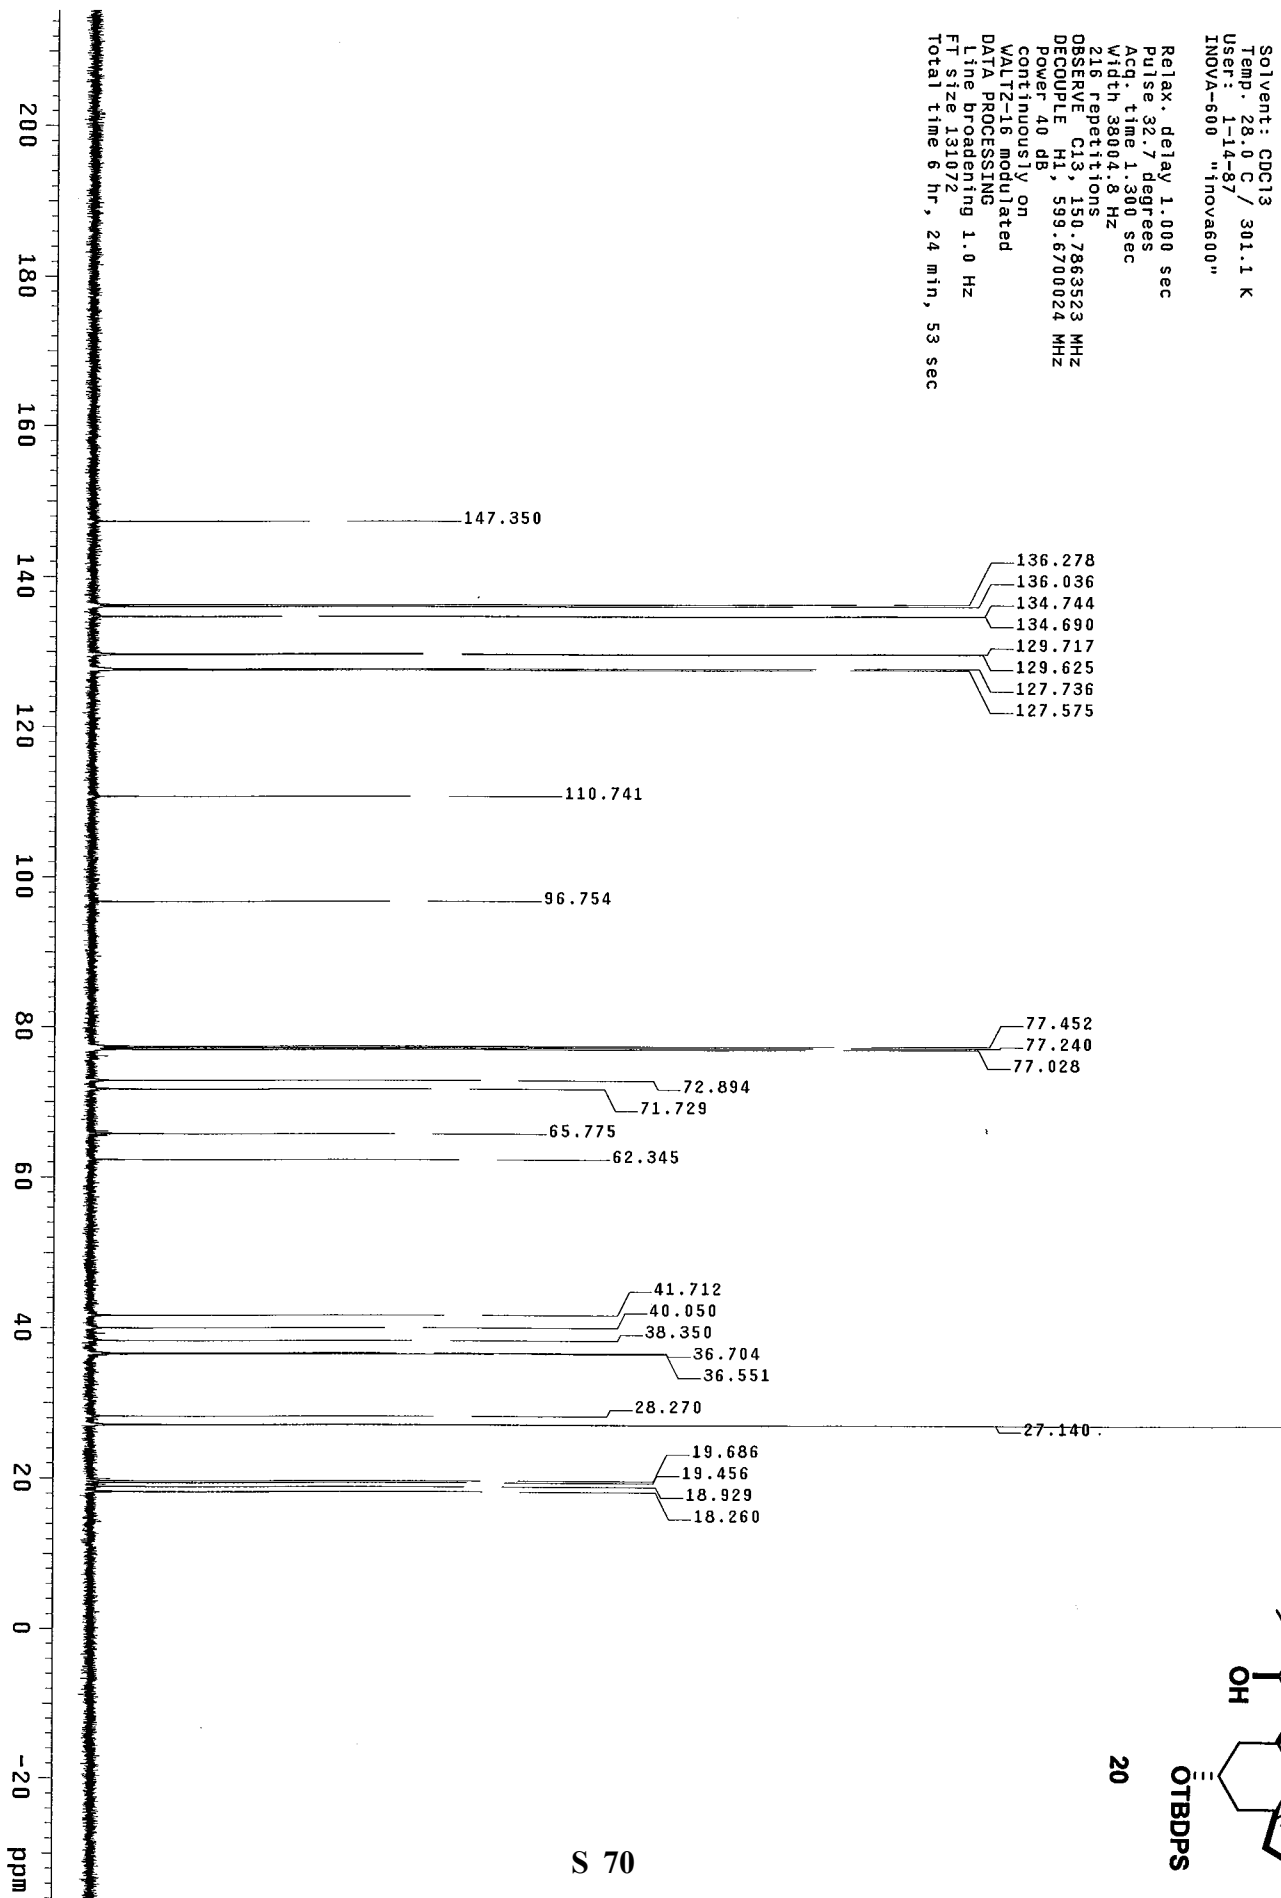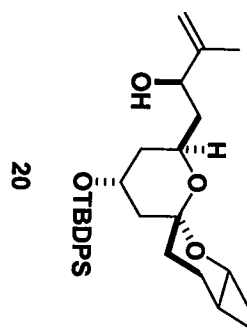

# STANDARD PROTON PARAMETERS

Archive directory: /export/home/vnmr1/vnmrsys/data  
 Sample directory:  
 File: PROTON

Pulse Sequence: s2pu1

Solvent: CDCl3

Temp: 28.0 C / 301.1 K

INNOVA-600 "Inova600"

Relax. delay 1.000 sec

Pulse 30.0 degrees

Acq. time 4.000 sec

Width 9594.6 Hz

8 repetitions

OBSERVE H1, 599.6670072 MHz

DATA PROCESSING

line broadening 0.2 Hz

FT size 131072

Total time 0 min, 40 sec

21

OTBDPS

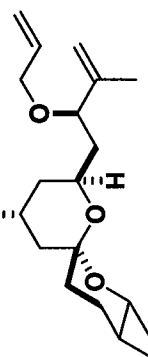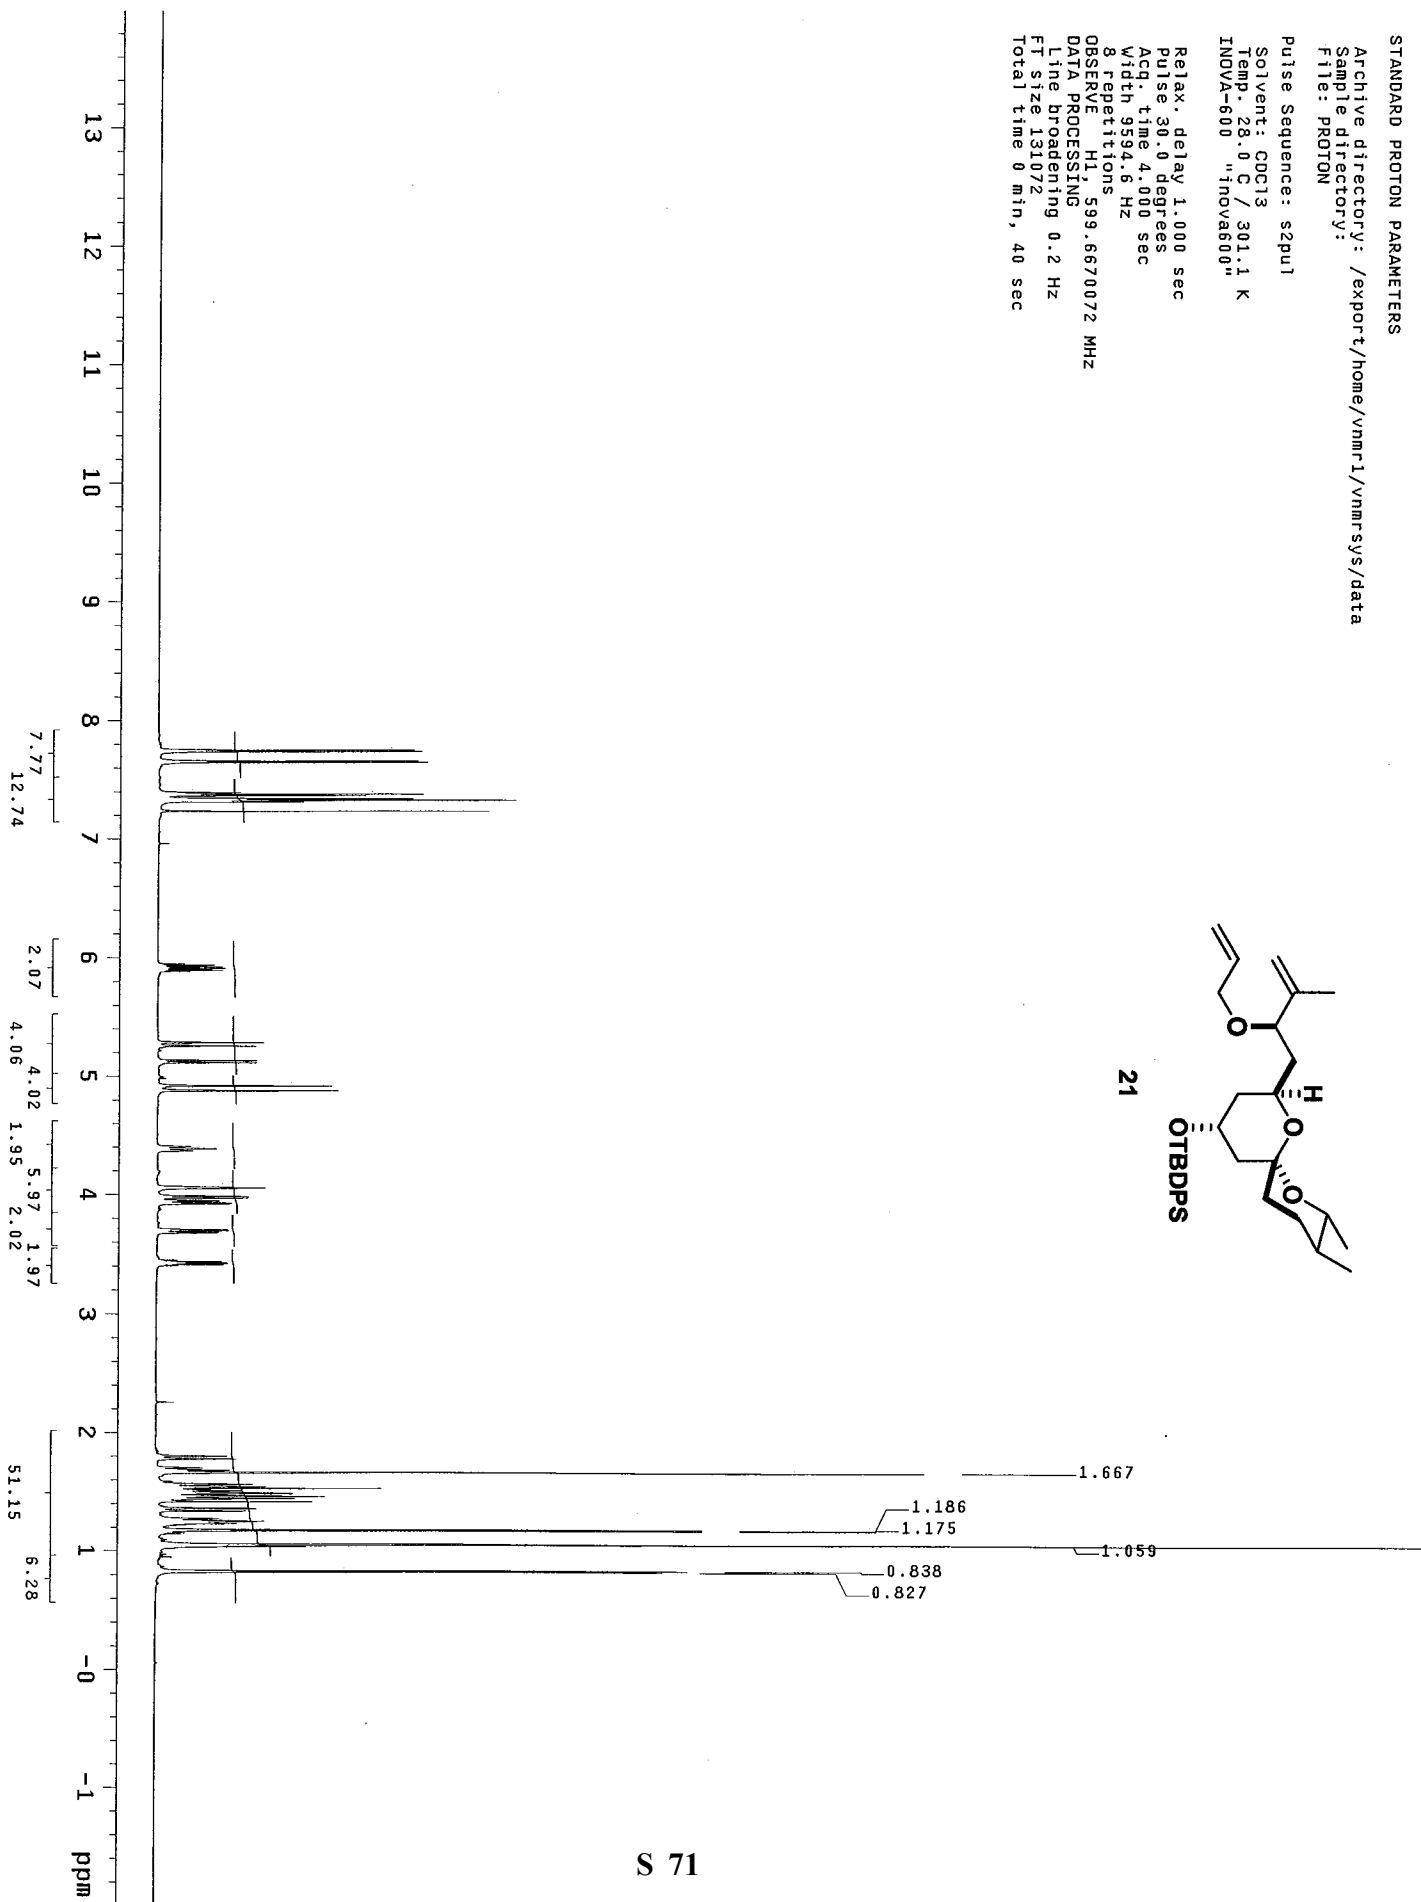

STANDARD CARBON PARAMETERS

Pulse Sequence: szpu1

Solvent: CDCl<sub>3</sub>

Temp: 28.0 C / 301.1 K

User: 1-14-87

INOV-600 "inov600"

Relax. delay 1.00 sec

Pulse 32.7 degrees

Acq. time 1.300 sec

Width 38004.8 Hz

232 repetitions

OBSERVE C13, 150.7863497 MHz

DECOUPLE H1, 599.6700024 MHz

Power 40 dB

continuous on

WALTZ-16 modulated

DATA PROCESSING

Line broadening 1.0 Hz

FT size 151072

Total time 64 hr, 8 min, 57 sec

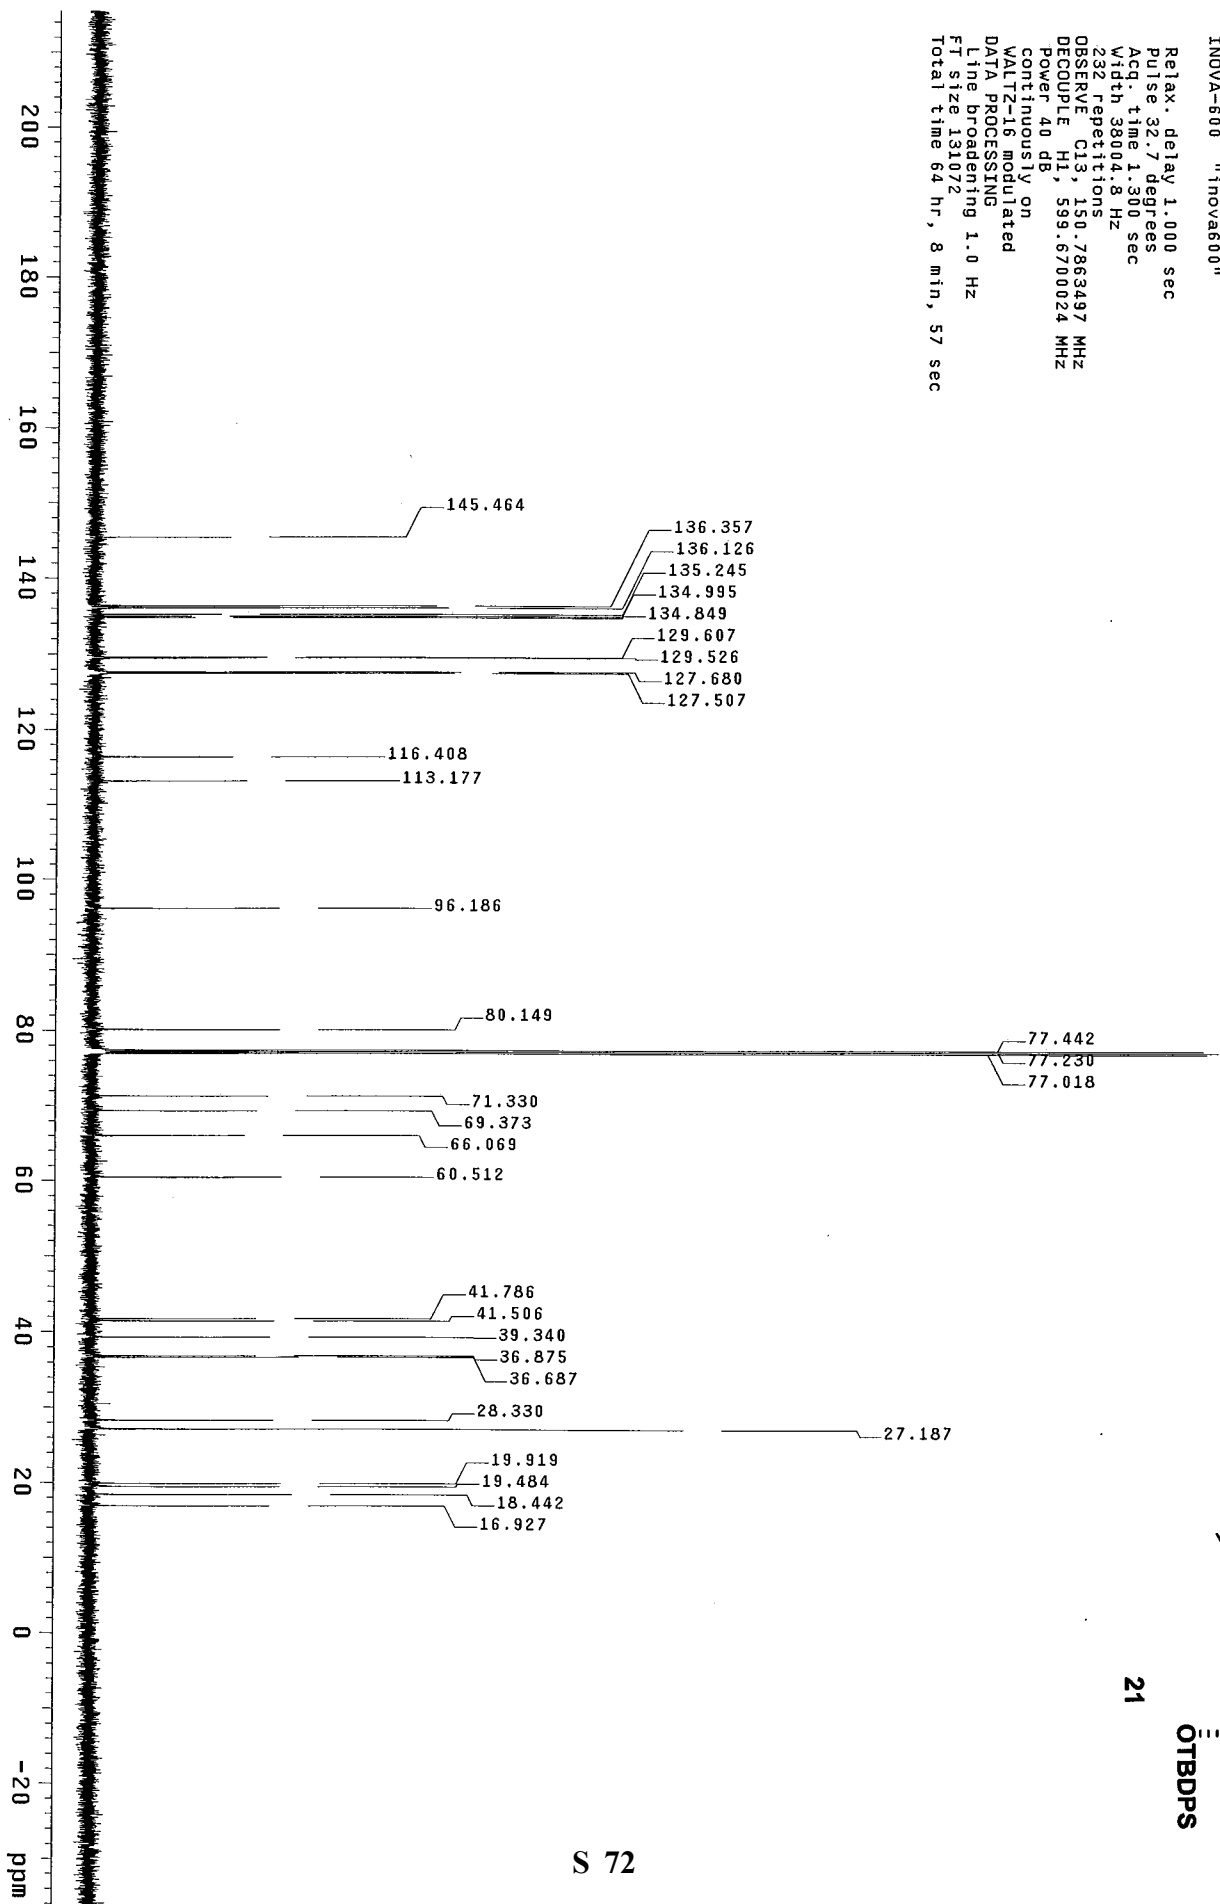

21

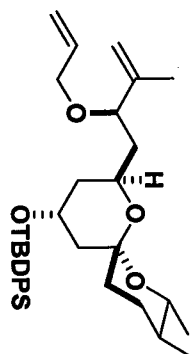

# STANDARD PROTON PARAMETERS

Archive directory: /export/home/vnmr1/vnmrSYS/data  
Sample directory:  
File: PROTON

Pulse Sequence: s2pu1

Solvent: Acetone  
Temp: 28.0 C / 301.1 K  
INNOVA-600 "Inova600"

Relax. delay 1.000 sec  
Pulse 30.0 degrees

Acq. time 4.000 sec  
Width 9594.6 Hz

16 repetitions

OBSERVE H1, 599.6701096 MHz

DATA PROCESSING

line broadening 0.2 Hz

FT size 131072

Total time 1 min, 20 sec

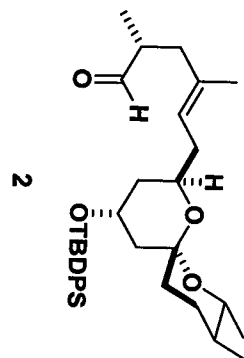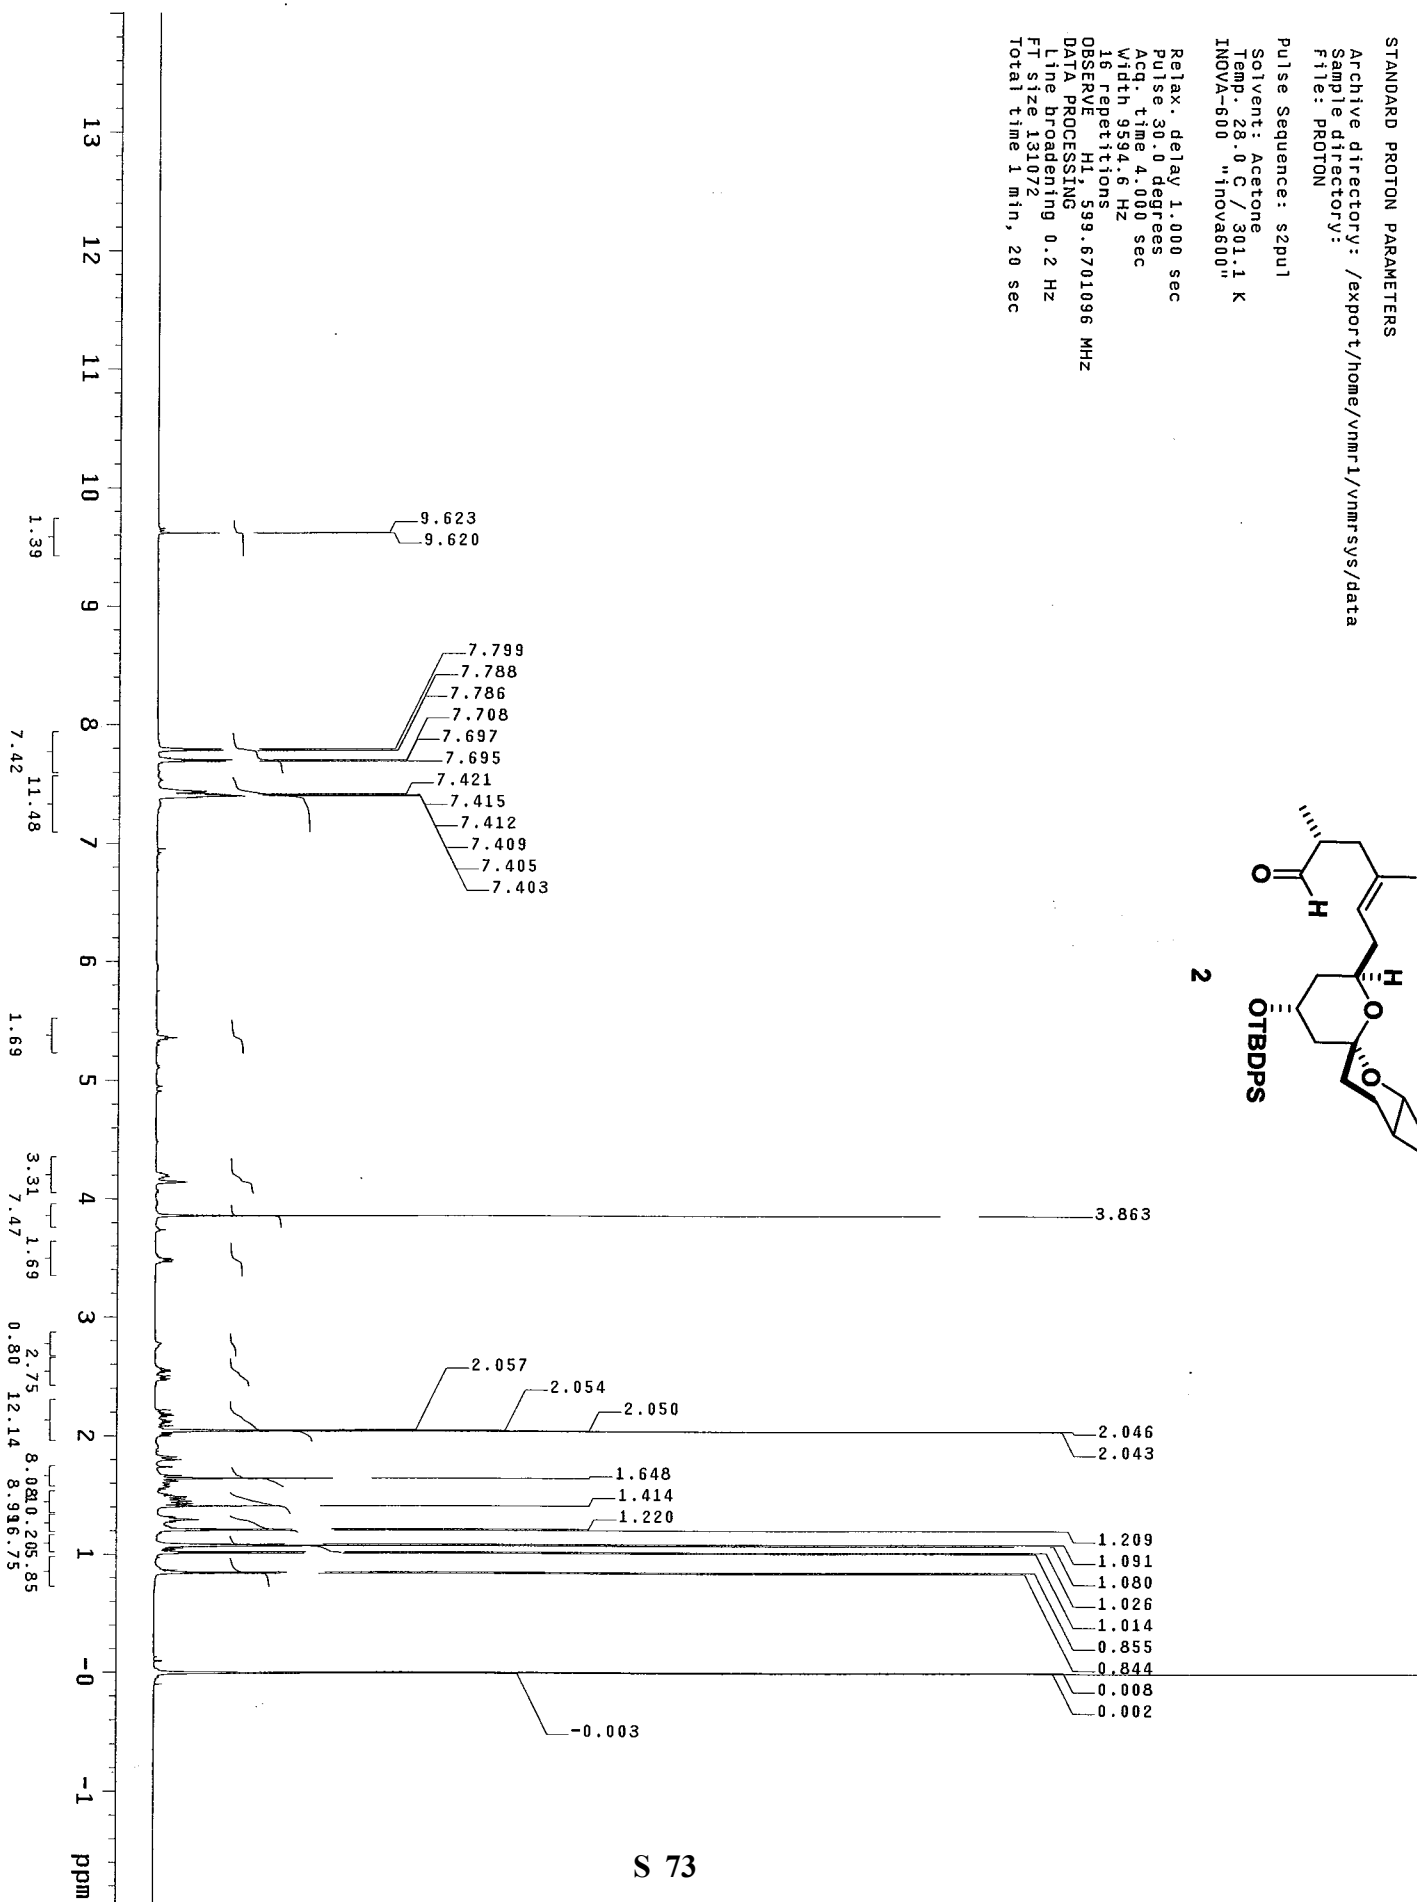

## STANDARD CARBON PARAMETERS

Pulse Sequence: szpu1

Solvent: Acetone

Temp. 28.0 C / 301.1 K

User: 11-14-87

INNOVA-600 "innova600"

Relax. delay 0.500 sec

Pulse 29.9 degrees

Acq. time 1.400 sec

Width 40000.0 Hz

520 repetitions

OBSERVE: 13C13, 150.7869322 MHz

DECOUPLE: H1, 599.6731147 MHz

Power 48.0 dB

continuously on

WALTZ-16 modulated

DATA PROCESSING

Line broadening 1.0 Hz

FT size 131072

Total time 530 hr, 15 min, 3 sec

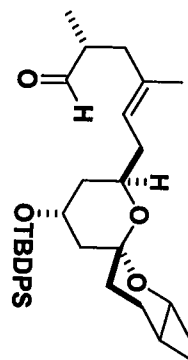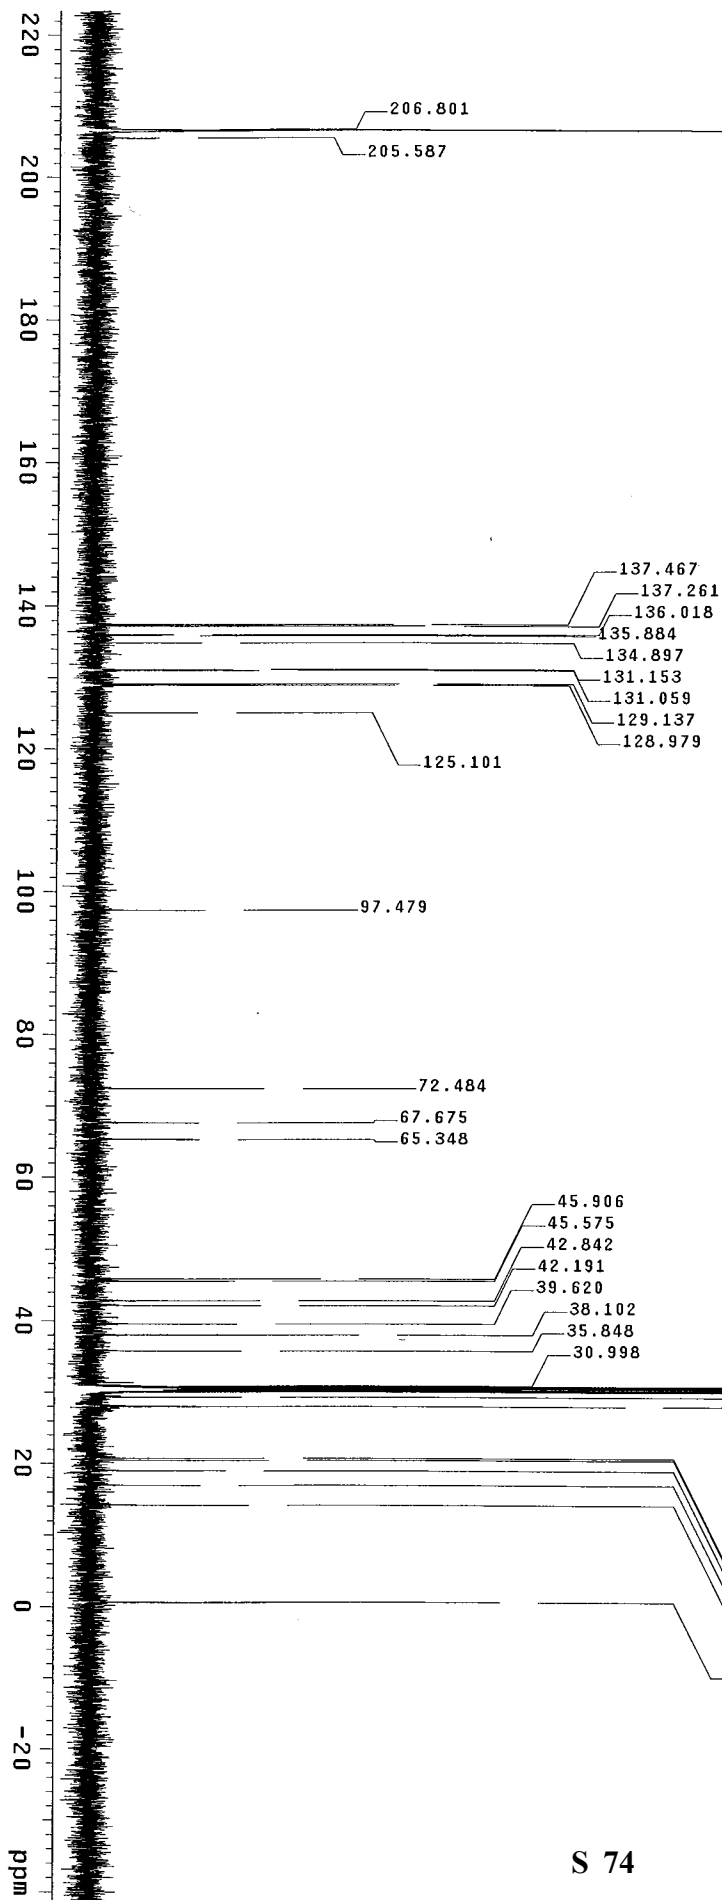

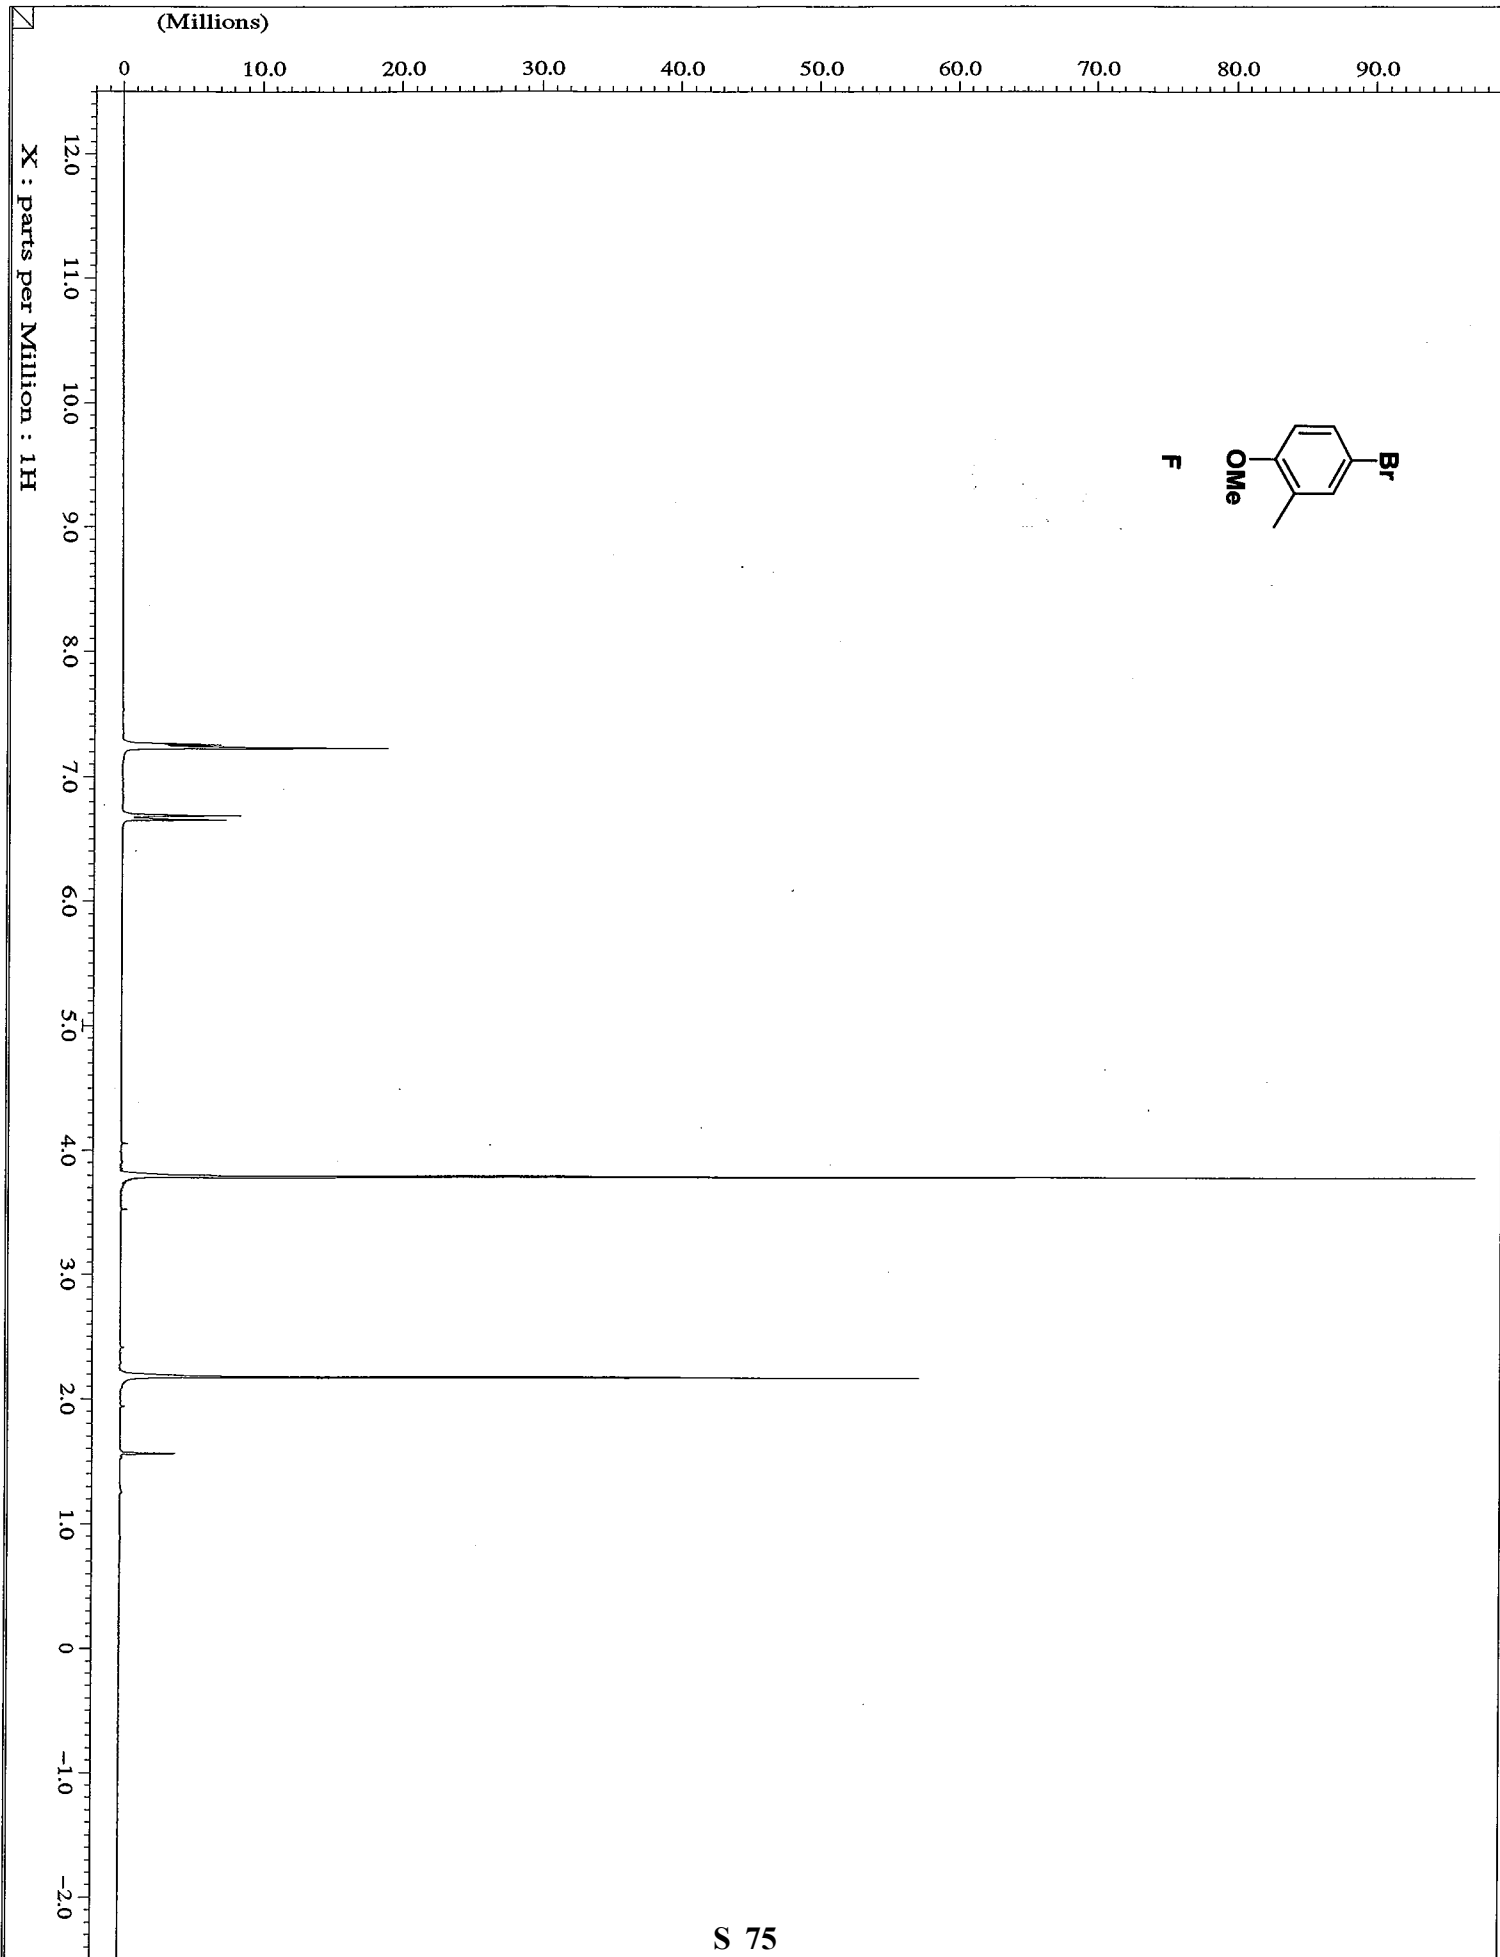

(Millions)

X : parts per Million :  $^{13}\text{C}$

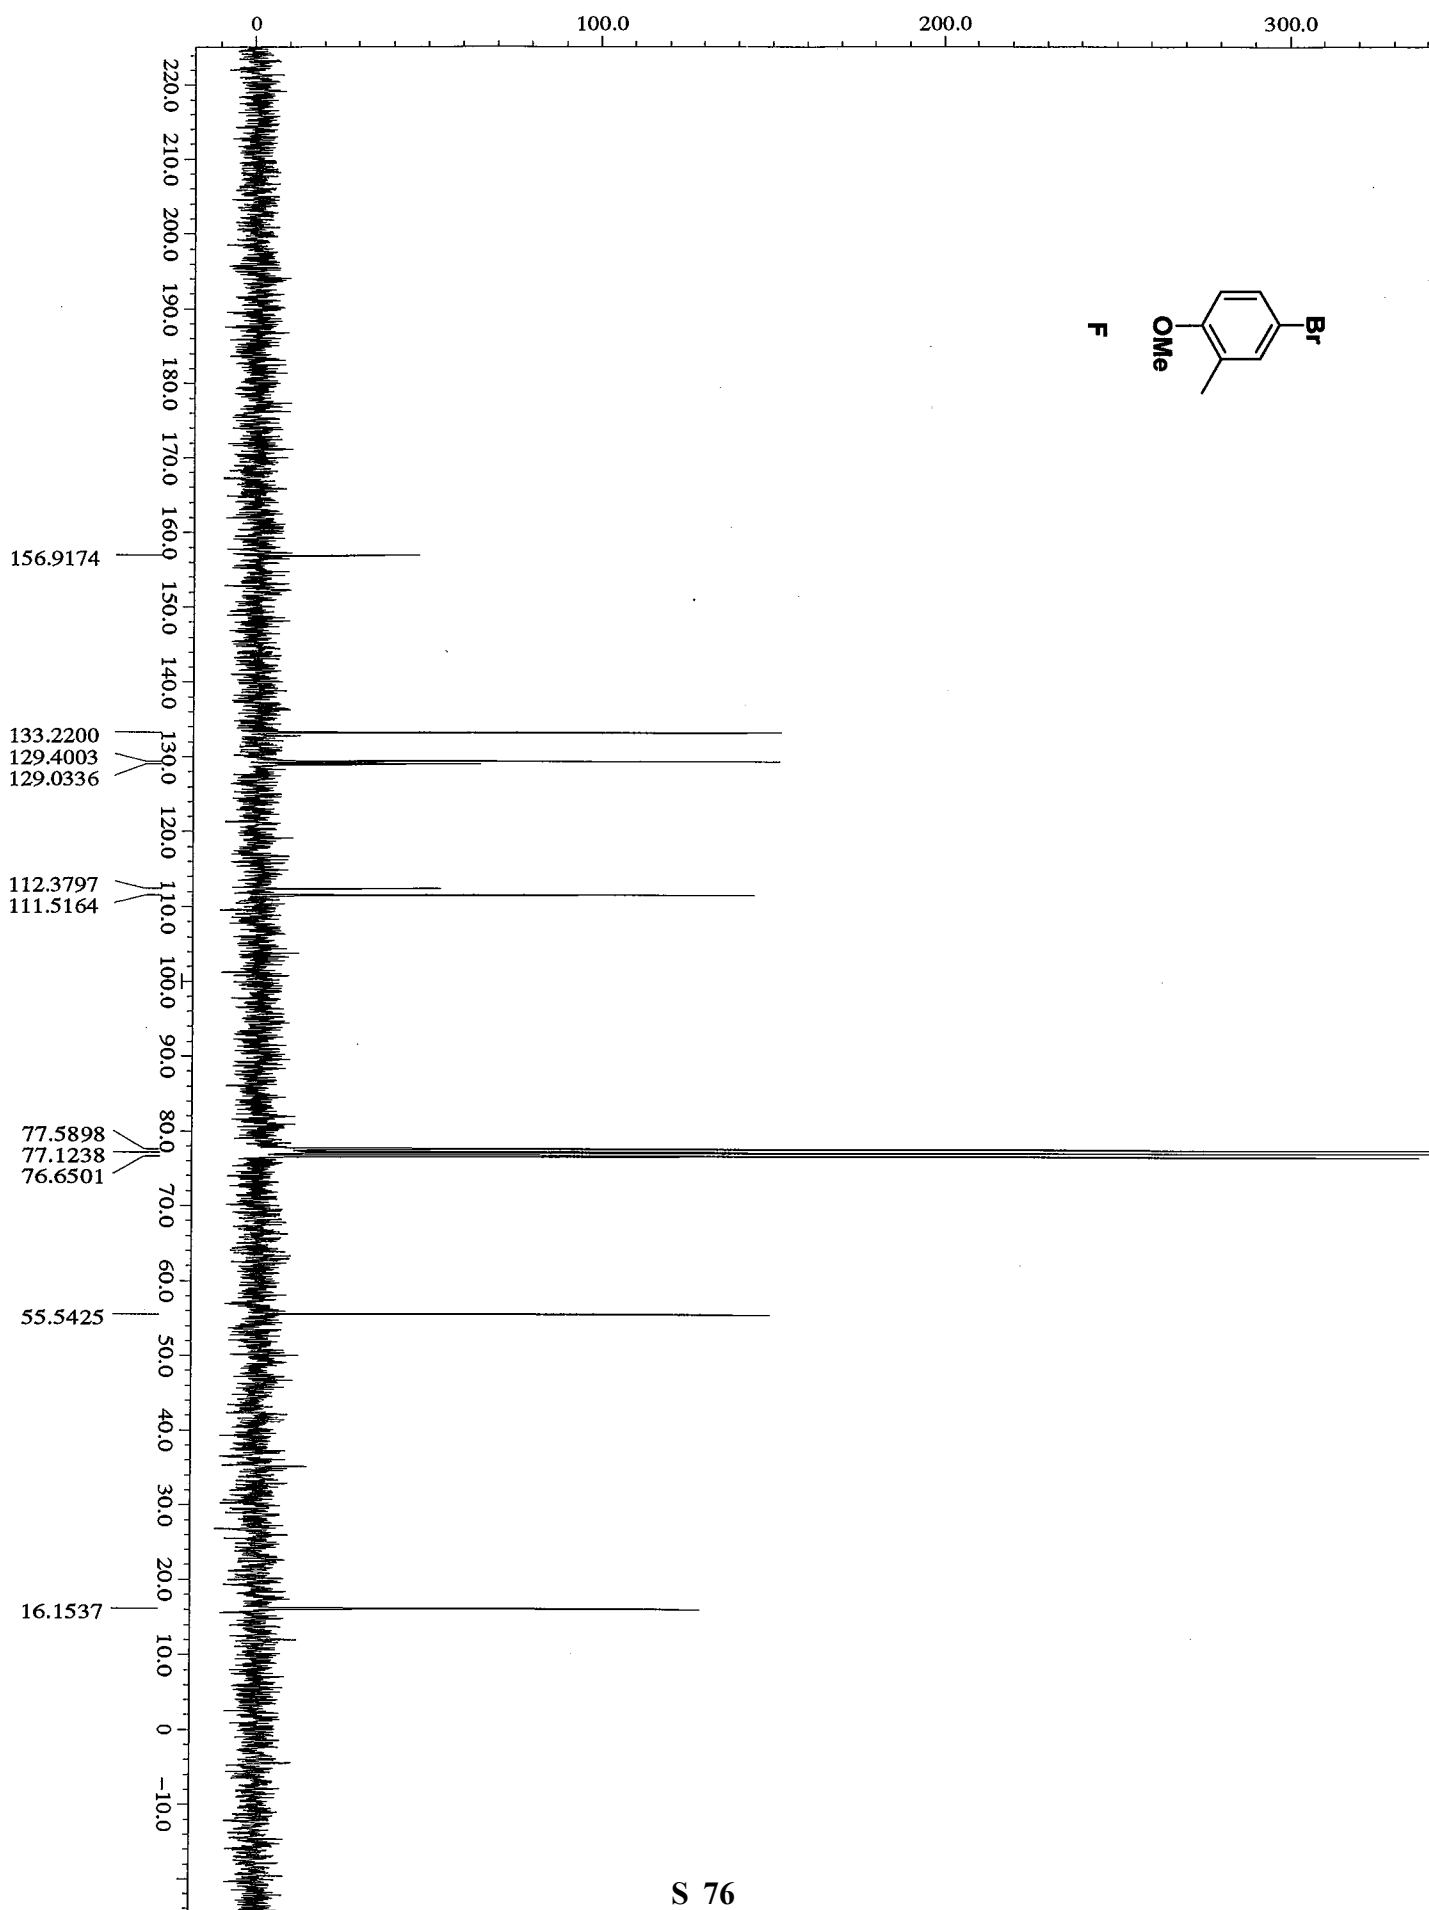

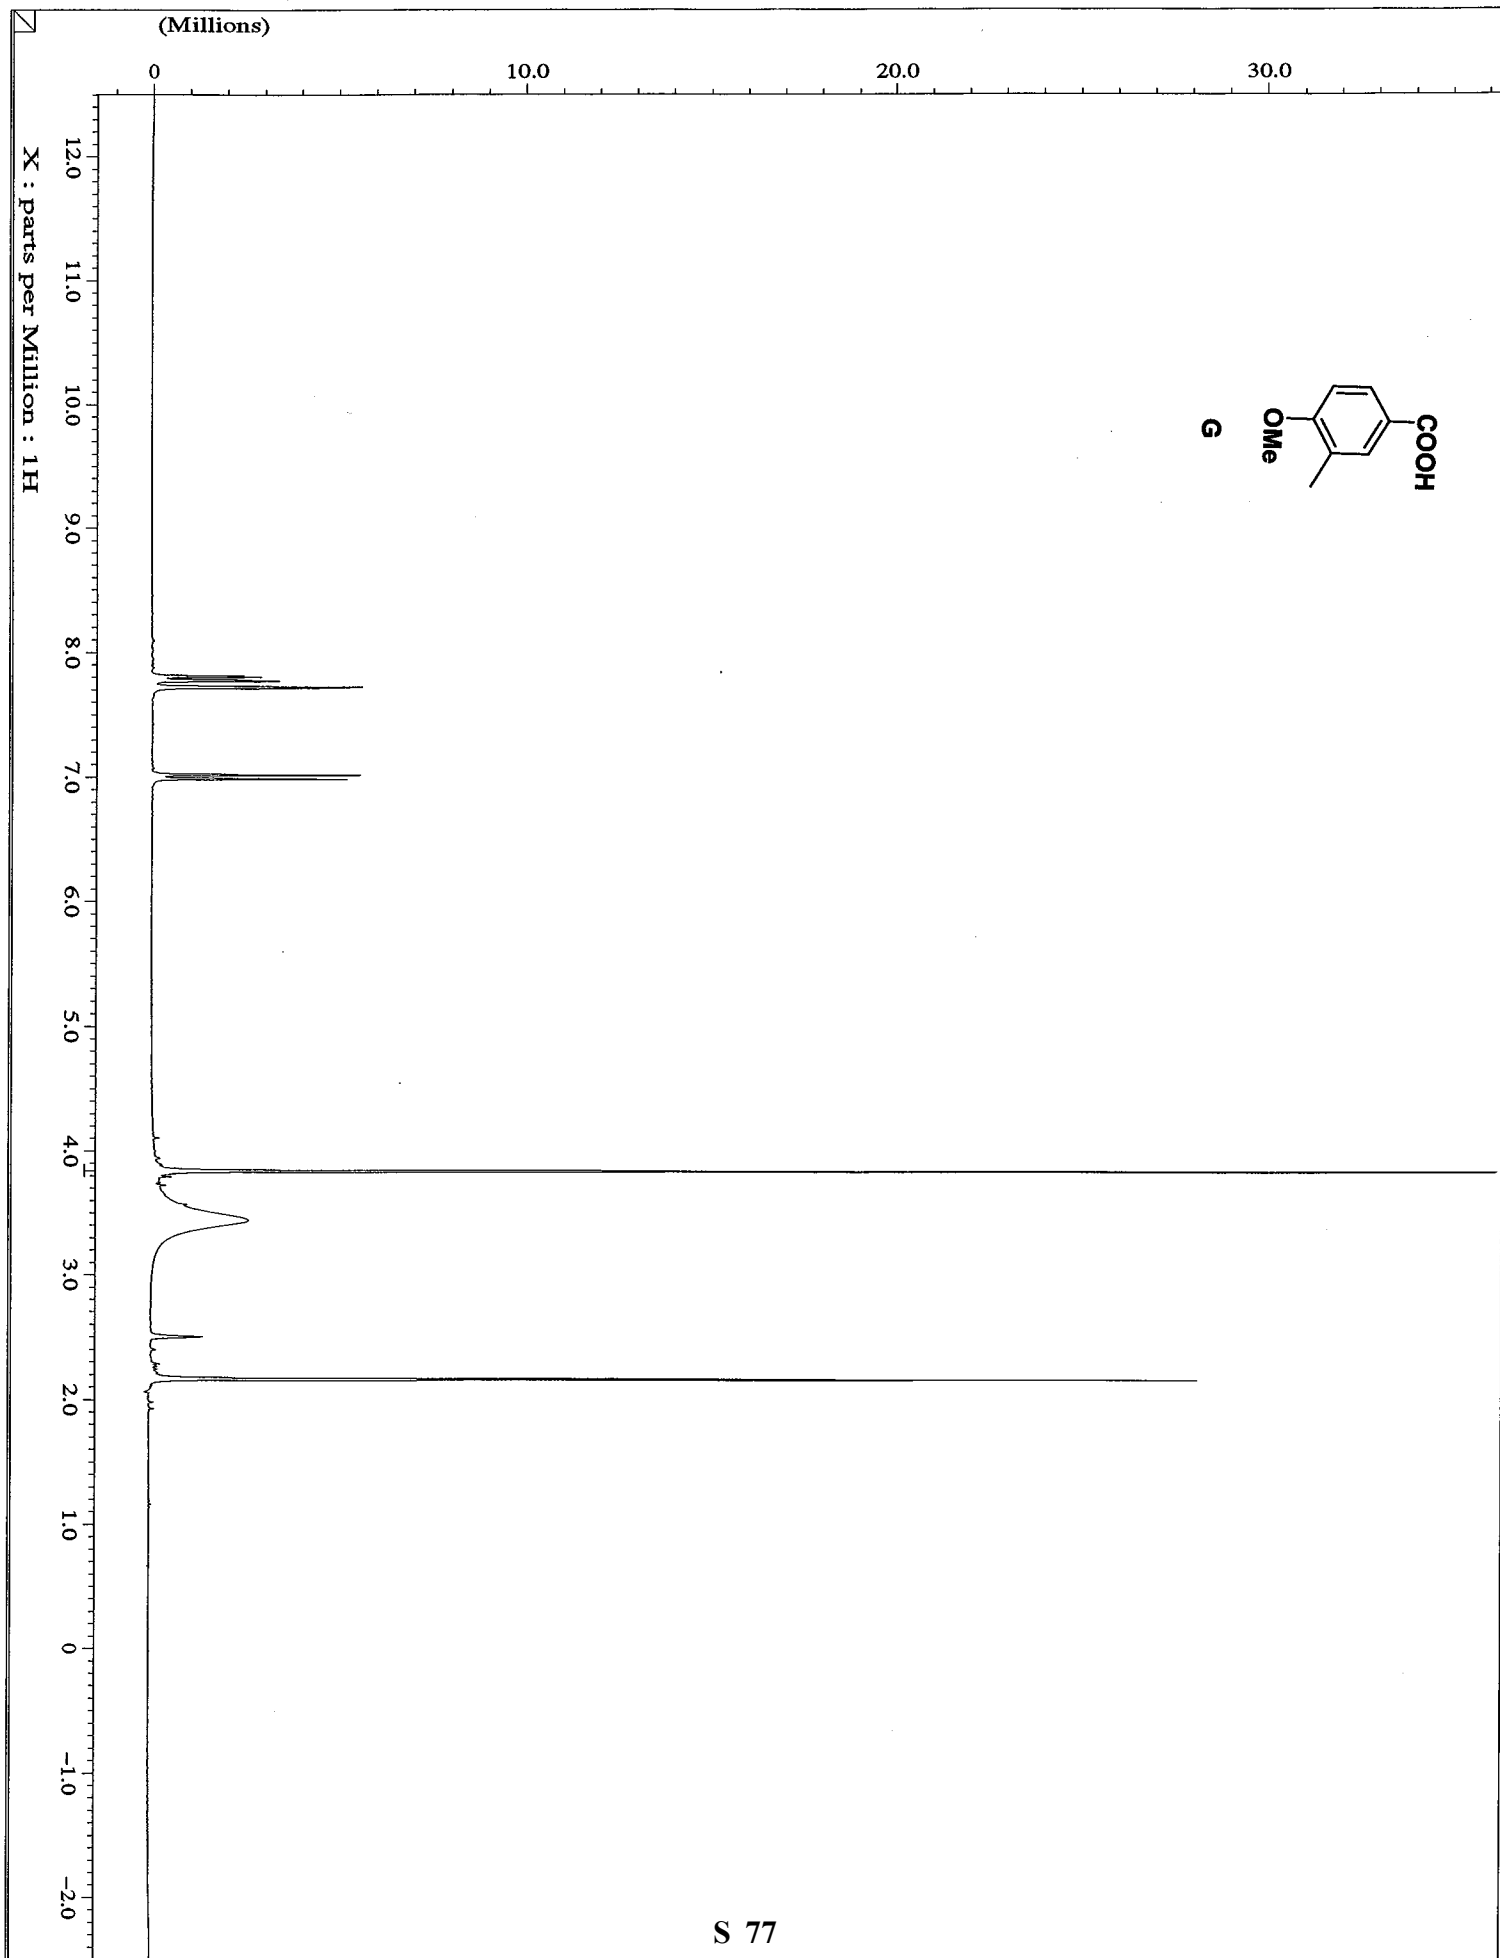

(Millions)

100.0

200.0

300.0

X : parts per Million : 13C

167.7577

161.5011

132.0282

129.8281

126.1688

122.9221

110.4240

56.1078

40.2713

39.9657

39.6525

16.5051

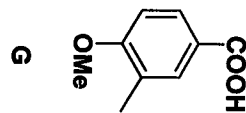

# STANDARD PROTON PARAMETERS

Archive directory: /export/home/vnmr1/vnmrSYS/data  
Sample directory:  
File: PROTON

Pulse Sequence: s2pu1

Solvent: CDCl3  
Temp: 28.0 C / 301.1 K  
INNOVA-600 "Innova600"

Relax. delay 1.000 sec  
Pulse 30.0 degrees

Acq. time 4.000 sec  
Width 9594.6 Hz

10 repetitions

OBSERVE H1, 599.6670079 MHz

DATA PROCESSING  
line broadening 0.2 Hz

FT size 131072  
Total time 0 min, 50 sec

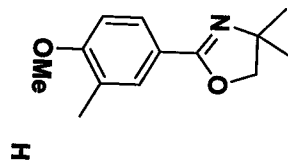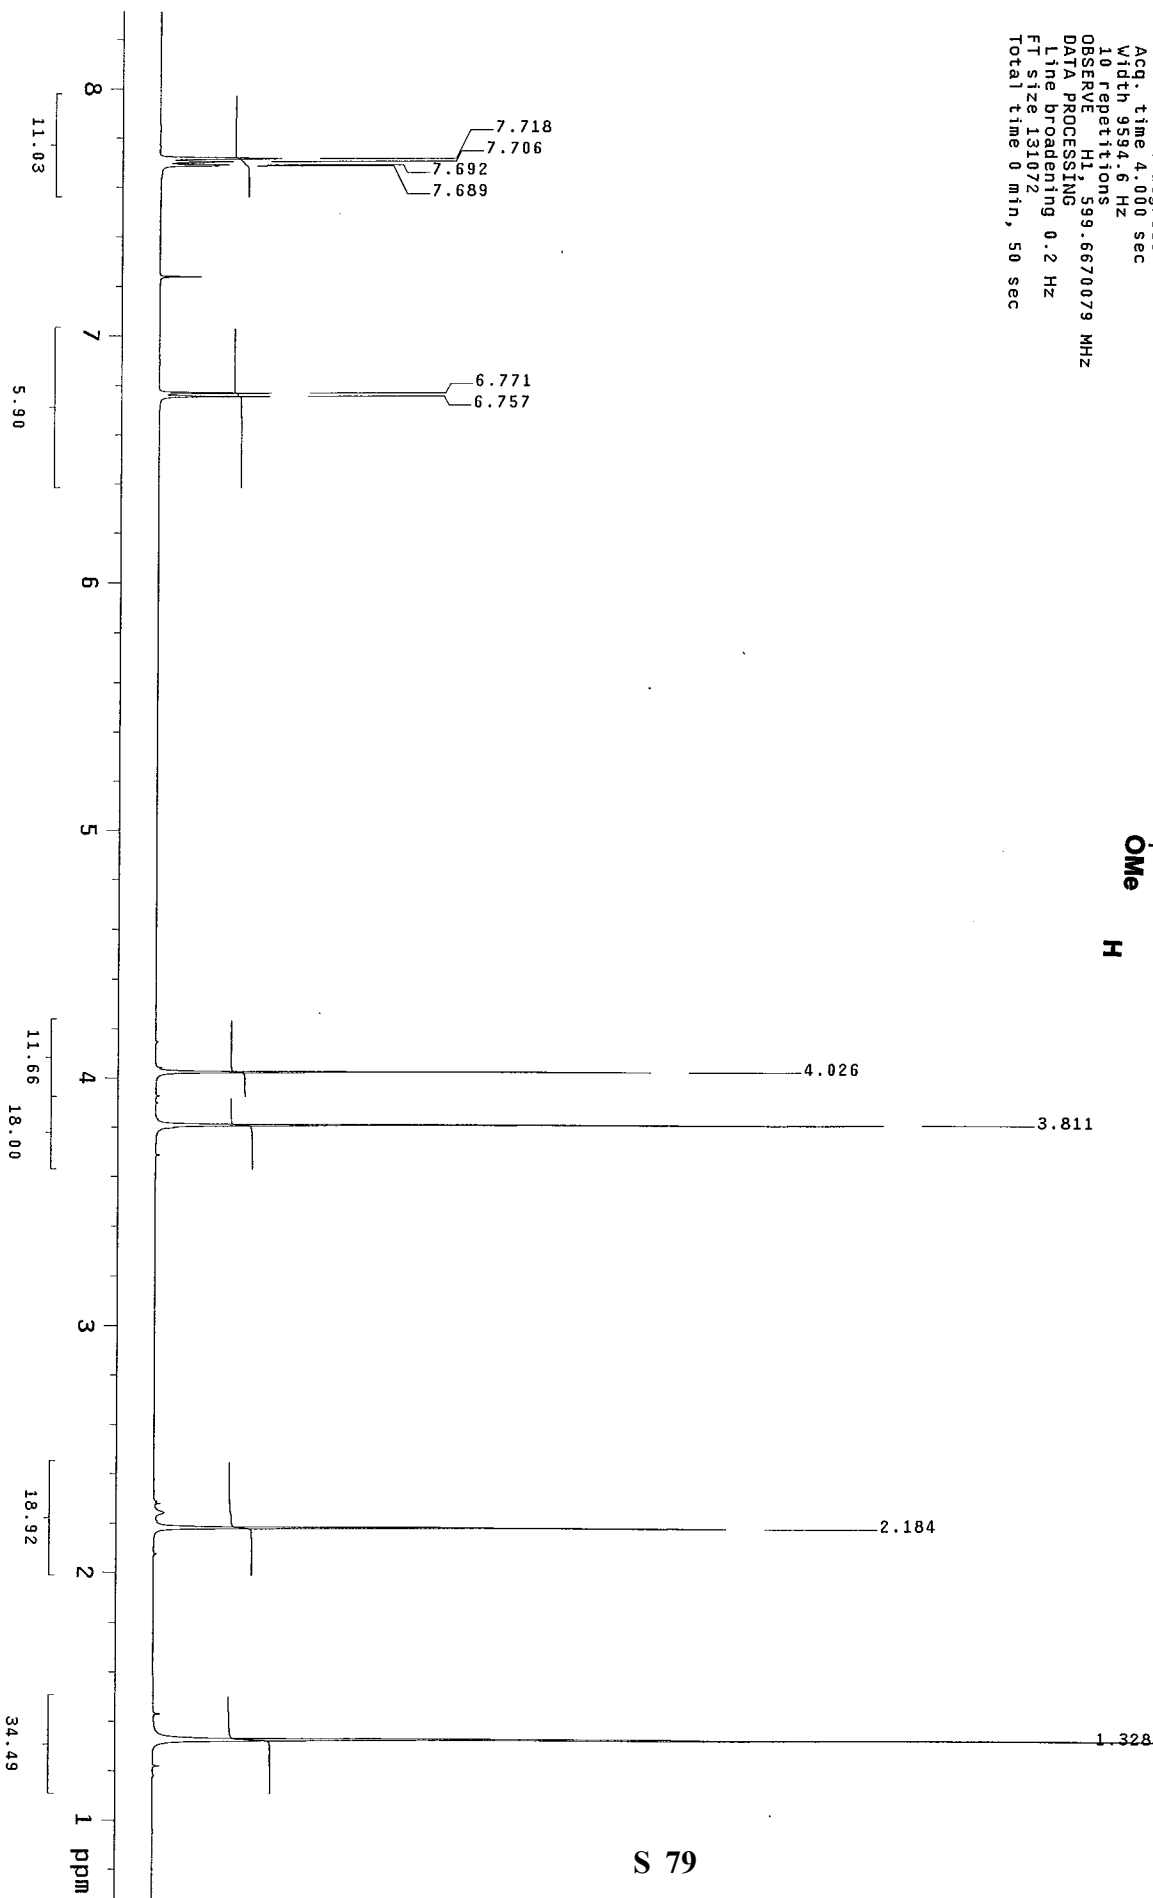

STANDARD CARBON PARAMETERS

Pulse Sequence: szput

Solvent: CDC13

Temp: 28.0 C / 301.1 K

User: 1-14-87

INNOVA-600 "Innova600"

Relax. delay 0.500 sec

Pulse 29.9 degrees

Acq. time 1.400 sec

Width 36003.6 Hz

64 repetitions

OBSERVE C13, 150.7863576 MHz

DECOUPLE H1, 599.6700024 MHz

Power 40 dB

continuously on

WALTZ-16 modulated

DATA PROCESSING

Line broadening 1.0 Hz

FT size 131072

Total time 32 min, 34 sec

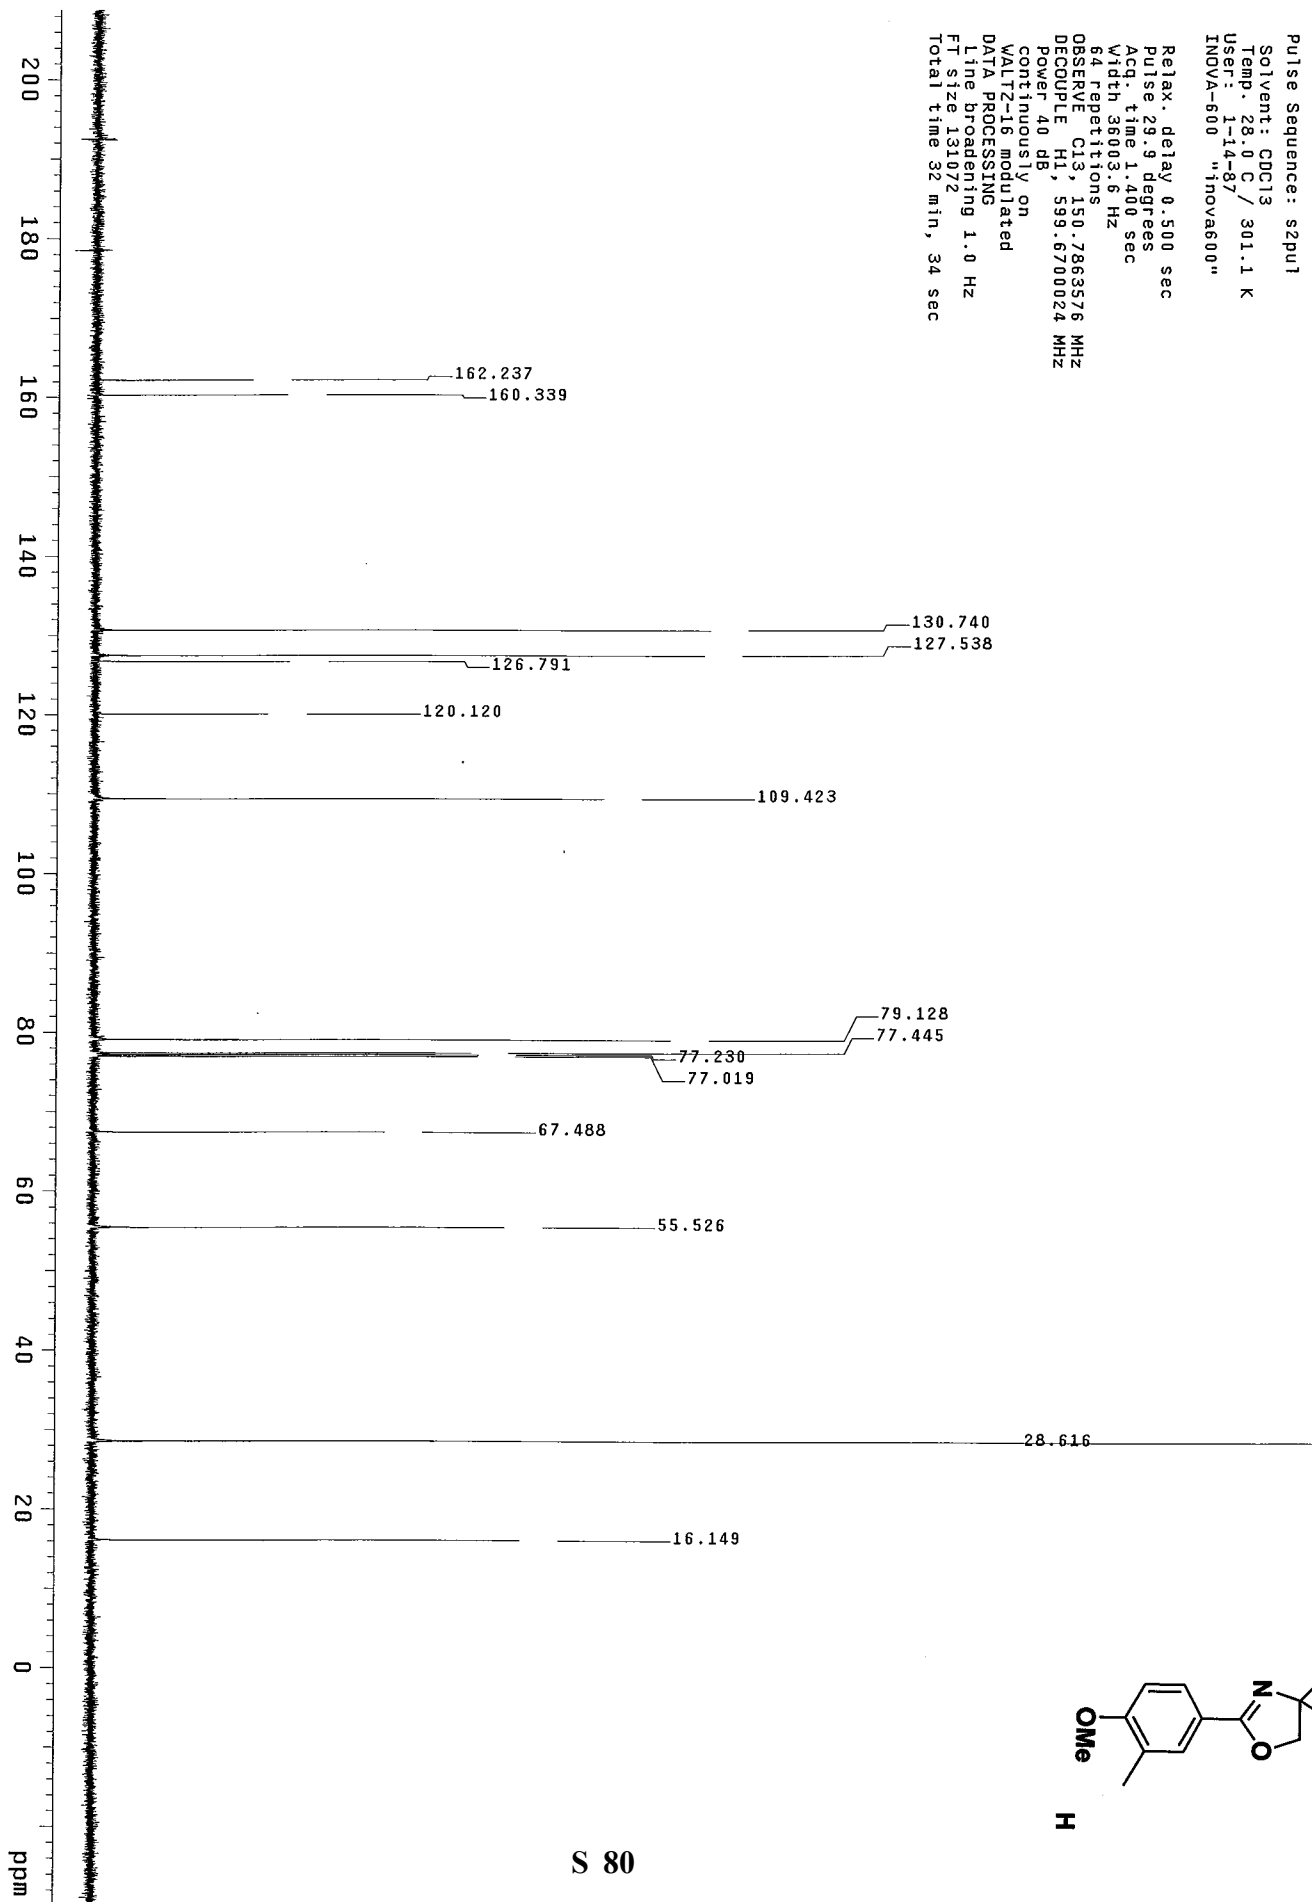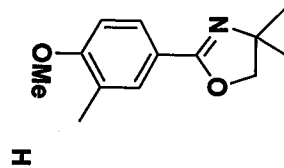

# STANDARD PROTON PARAMETERS

Archive directory: /export/home/vnmr1/vnmrsys/data  
Sample directory:  
File: PROTON

Pulse Sequence: s2pu1

Solvent: CDCl3  
Temp: 28.0 C / 301.1 K  
INNOVA-600 "Innova600"

Relax. delay 1.000 sec  
Pulse 30.0 degrees  
Acq. time 4.000 sec  
Width 9594.6 Hz  
12 repetitions  
OBSERVE H1, 599.6670076 MHz  
DATA PROCESSING  
Line broadening 0.2 Hz  
FT size 131072  
Total time 1 min, 0 sec

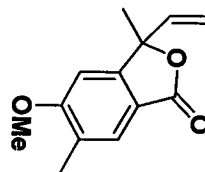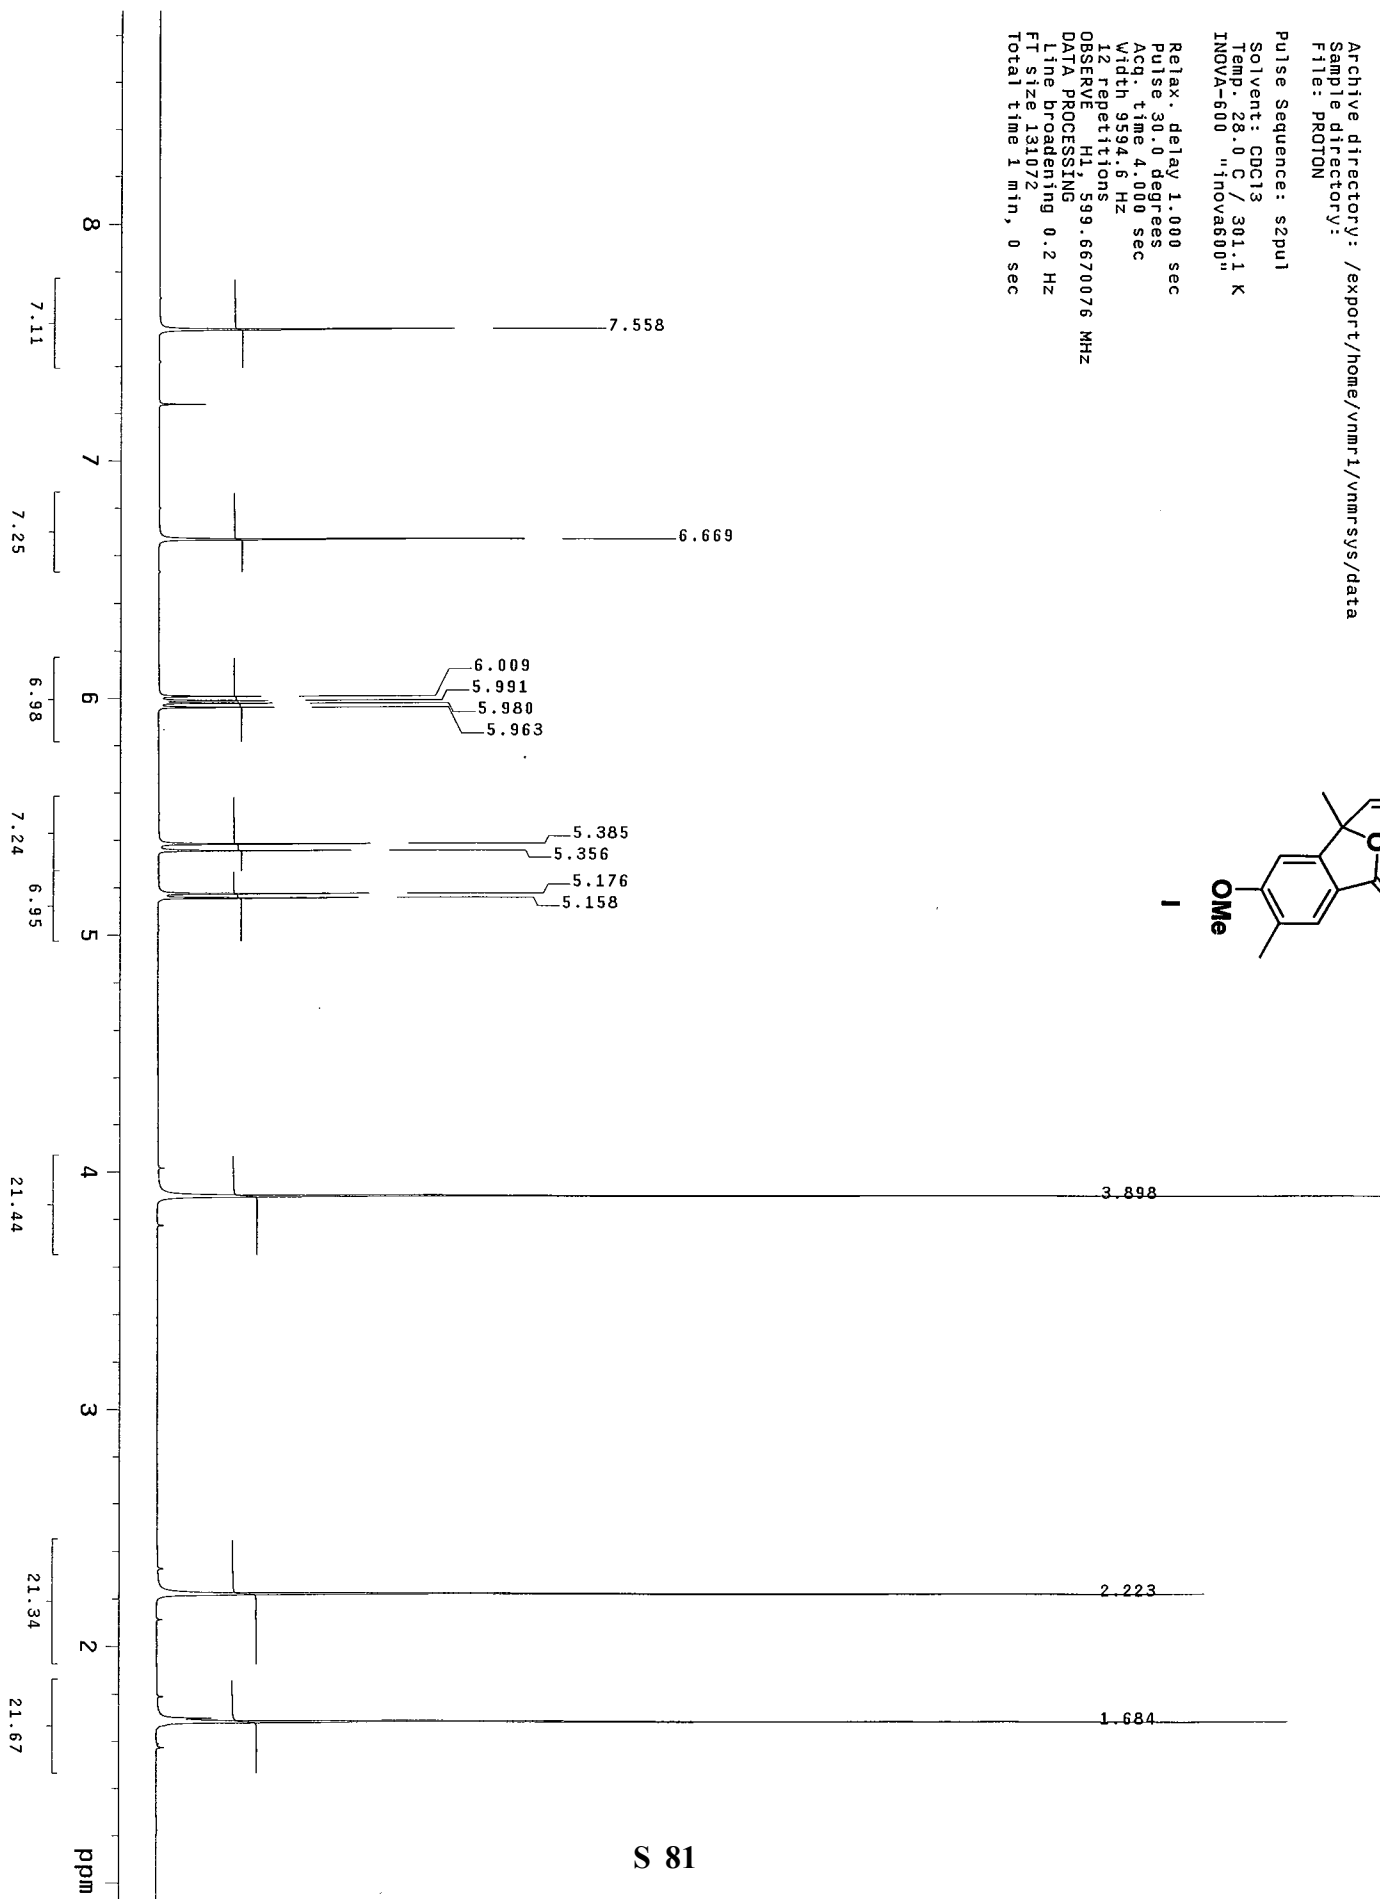

STANDARD CARBON PARAMETERS

Pulse Sequence: szpu1

Solvent: CDCl3

Temp: 28.0 C / 301.1 K

User: 1-14-87

INNOVA-600 "Innova600"

Relax. delay 0.500 sec

Pulse 29.9 degrees

Acq. time 1.400 sec

Width 36003.6 Hz

240 repetitions

OBSERVE C13, 150.7863554 MHz

DECOUPLE H1, 599.670024 MHz

Power 40 dB

continuously on

WALTZ-16 modulated

DATA PROCESSING

Line broadening 1.0 Hz

FT size 131072

Total time 32 min, 34 sec

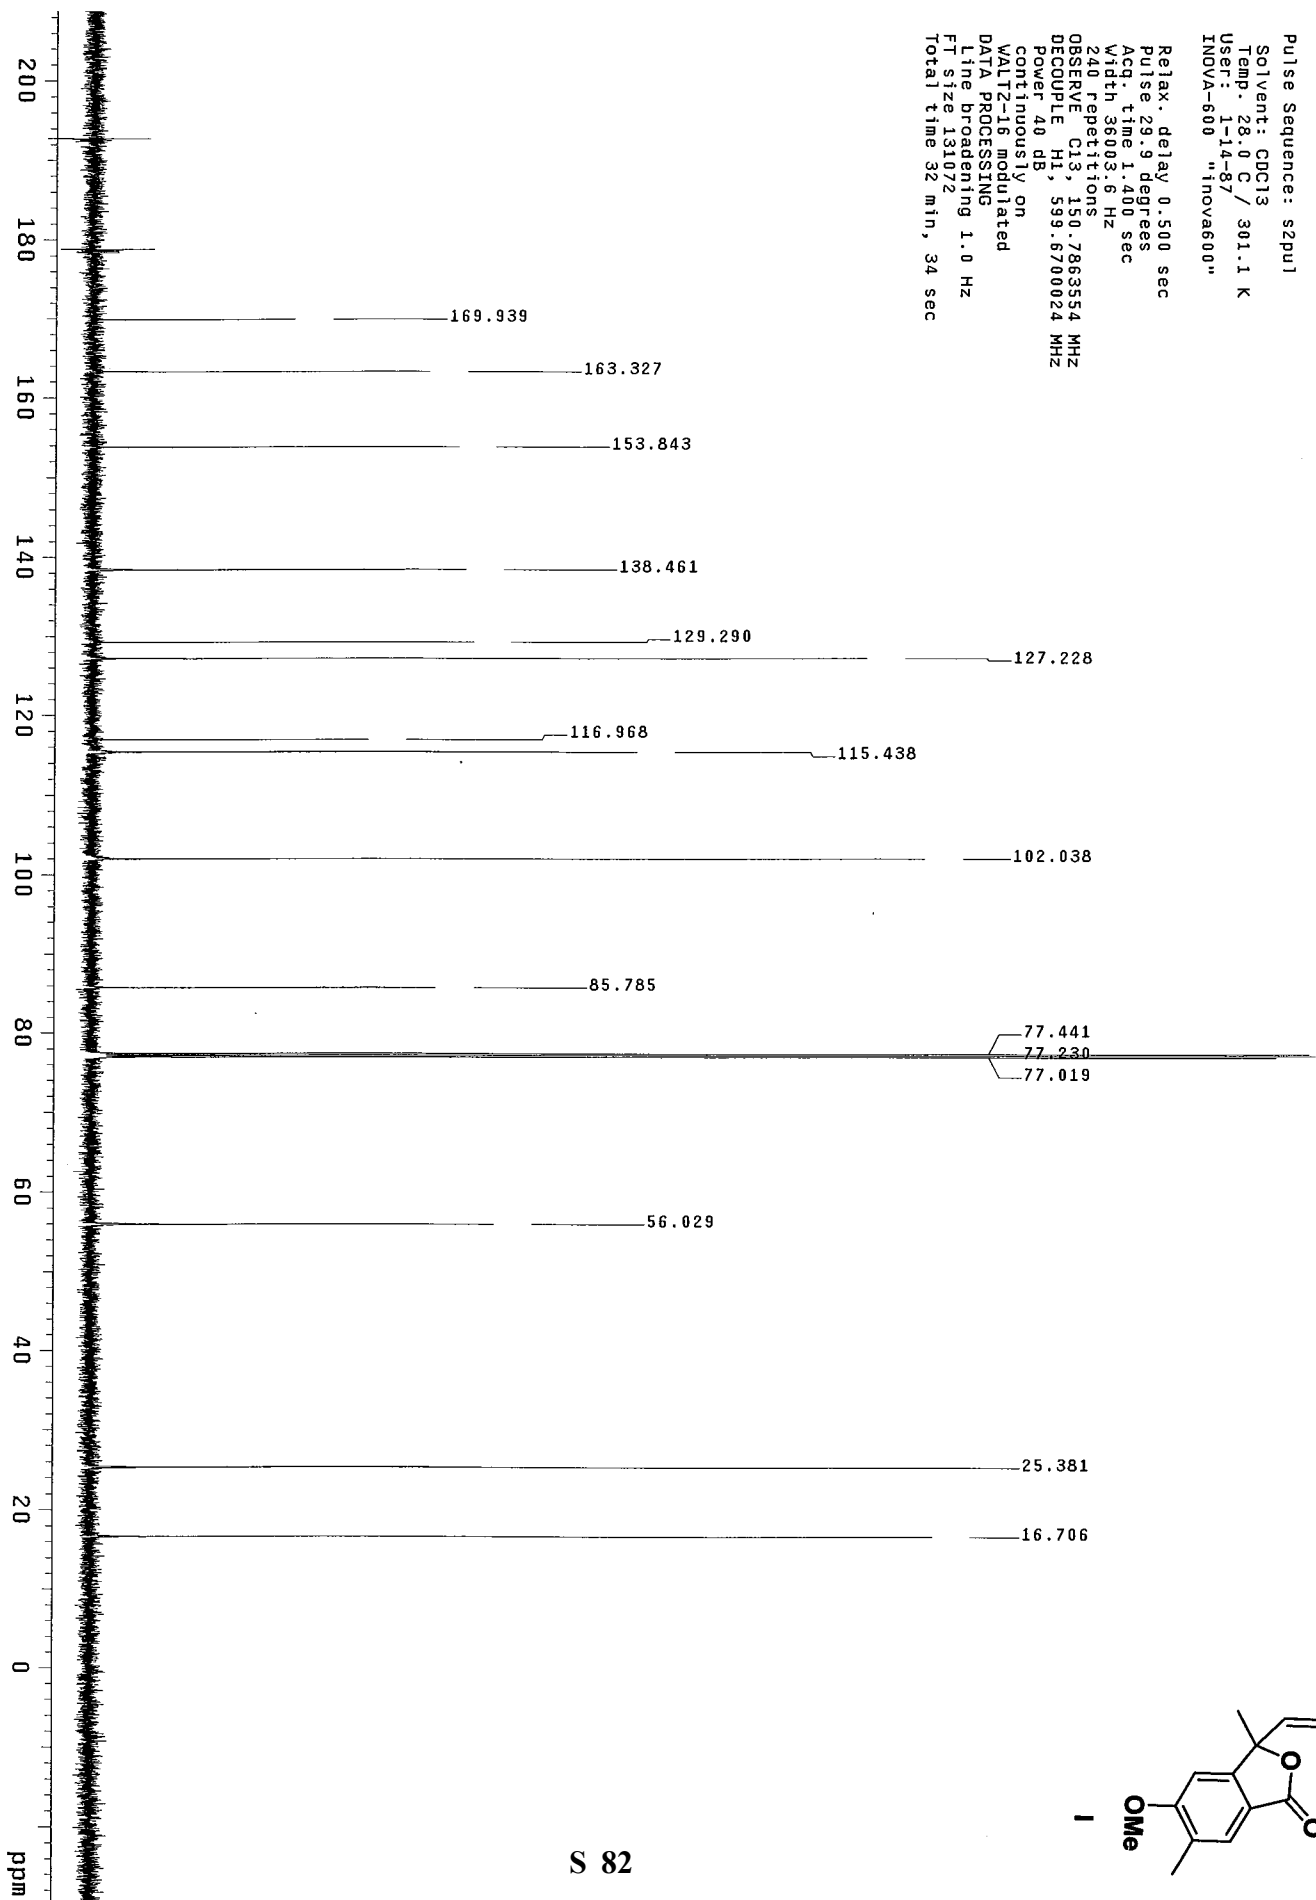

# STANDARD PROTON PARAMETERS

Archive directory: /export/home/vnmr1/vnmrsys/data  
 Sample directory:  
 File: PROTON

Pulse Sequence: s2pu1  
 Solvent: CDCl3  
 Temp: 28.0 C / 301.1 K  
 INOVA-600 "1nova600"

Relax. delay 1.000 sec  
 Pulse 30.0 degrees  
 Acq. time 4.000 sec  
 Width 9594.6 Hz  
 12 repetitions  
 OBSERVE H1, 599.6670079 MHz  
 DATA PROCESSING  
 Line broadening 0.2 Hz  
 FT size 131072  
 Total time 1 min, 0 sec

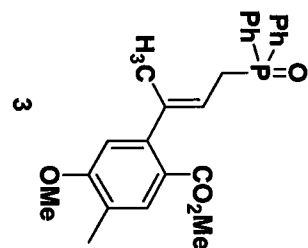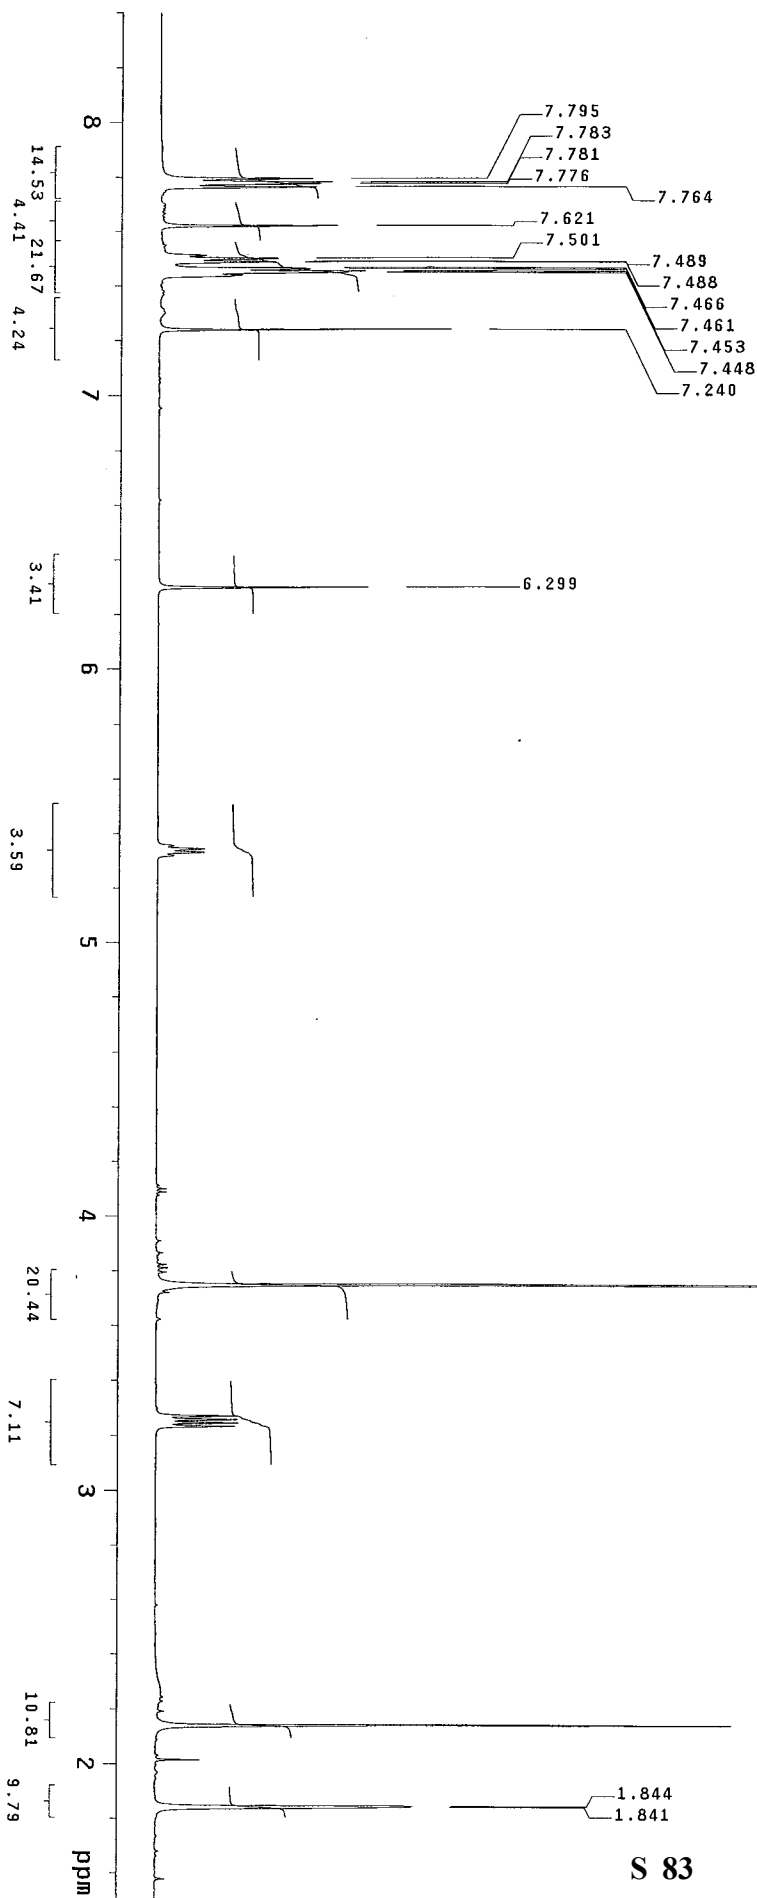

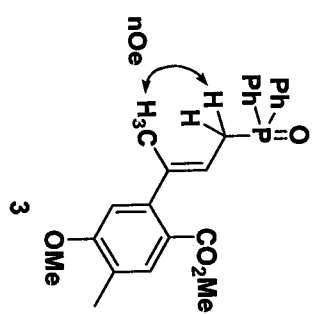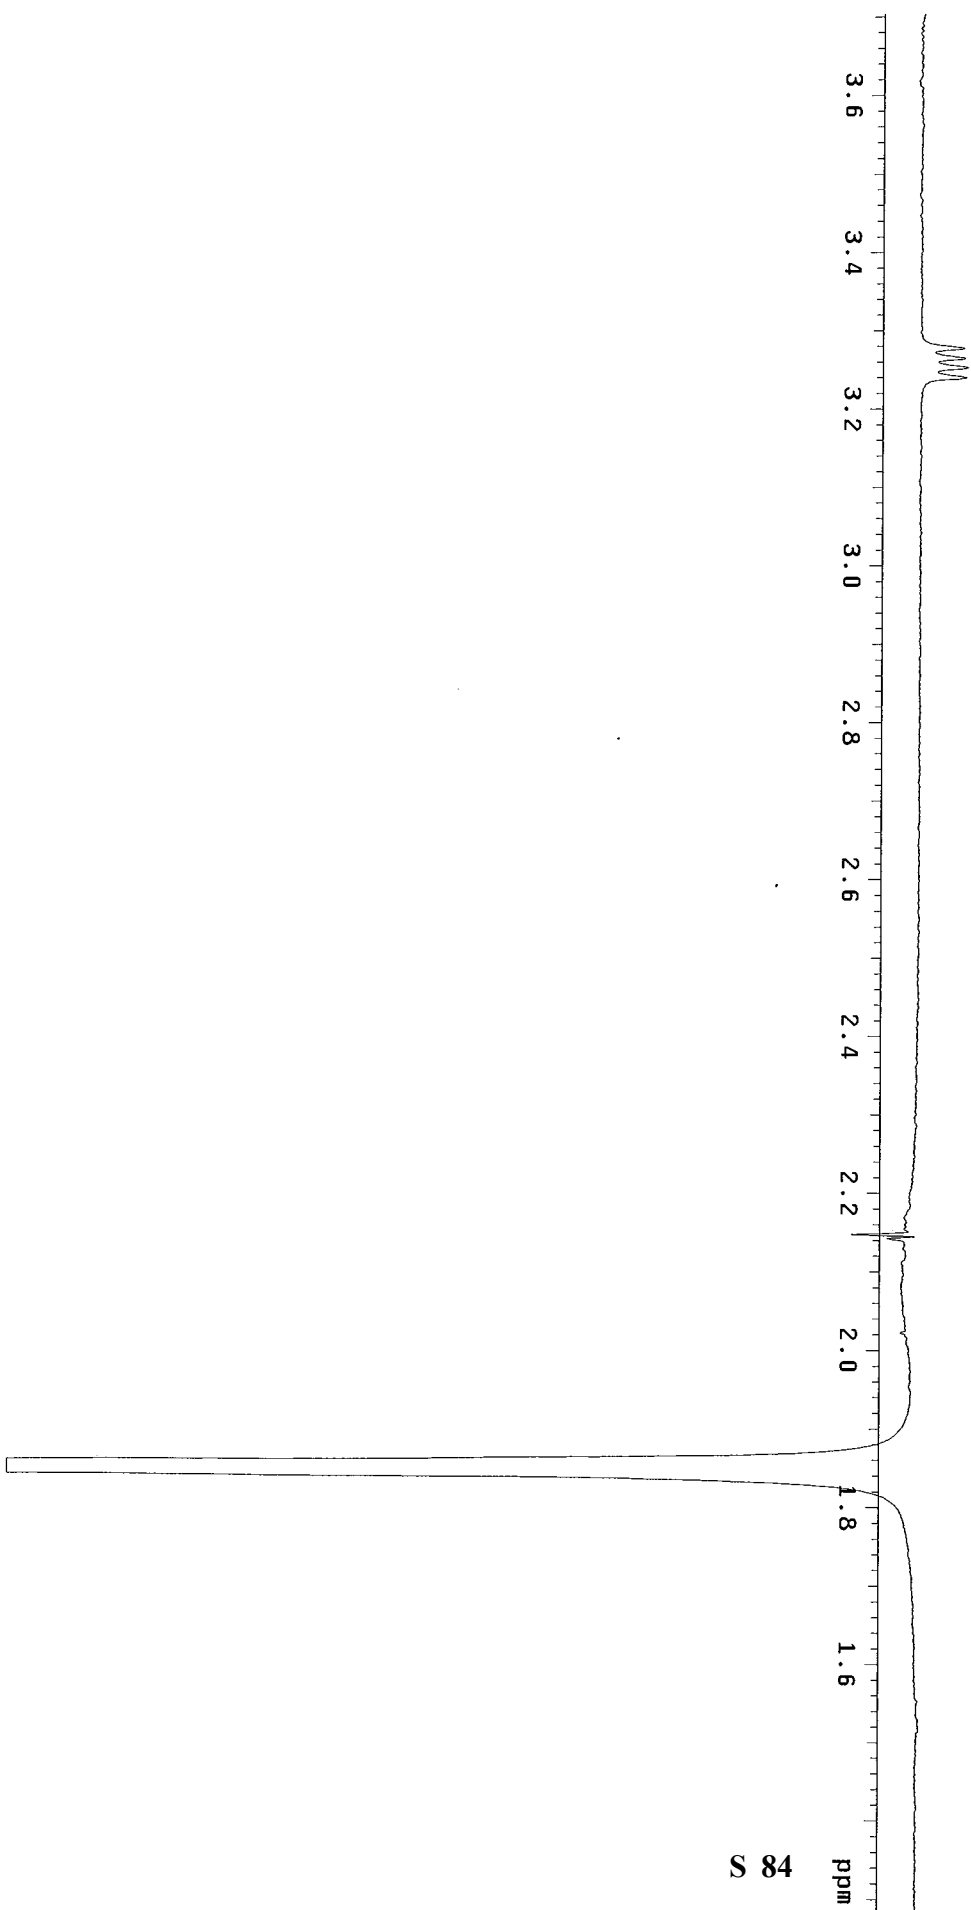

## STANDARD CARBON PARAMETERS

Pulse Sequence: szpul

Solvent: CDCl<sub>3</sub>

Temp: 28.0 C / 301.1 K

User: 1-14-87

INNOVA-600 "innova600"

Relax. delay 0.500 sec

Pulse 29.9 degrees

Acq. time 1.400 sec

Width 38004.8 Hz

528 repetitions

OBSERVE C13, 150.7863532 MHz

DECOUPLE H1, 599.6700024 MHz

Power 40 dB

continuously on

WALTZ-16 modulated

DATA PROCESSING

line broadening 1.0 Hz

FT size 131072

Total time 33 hr, 1 min, 31 sec

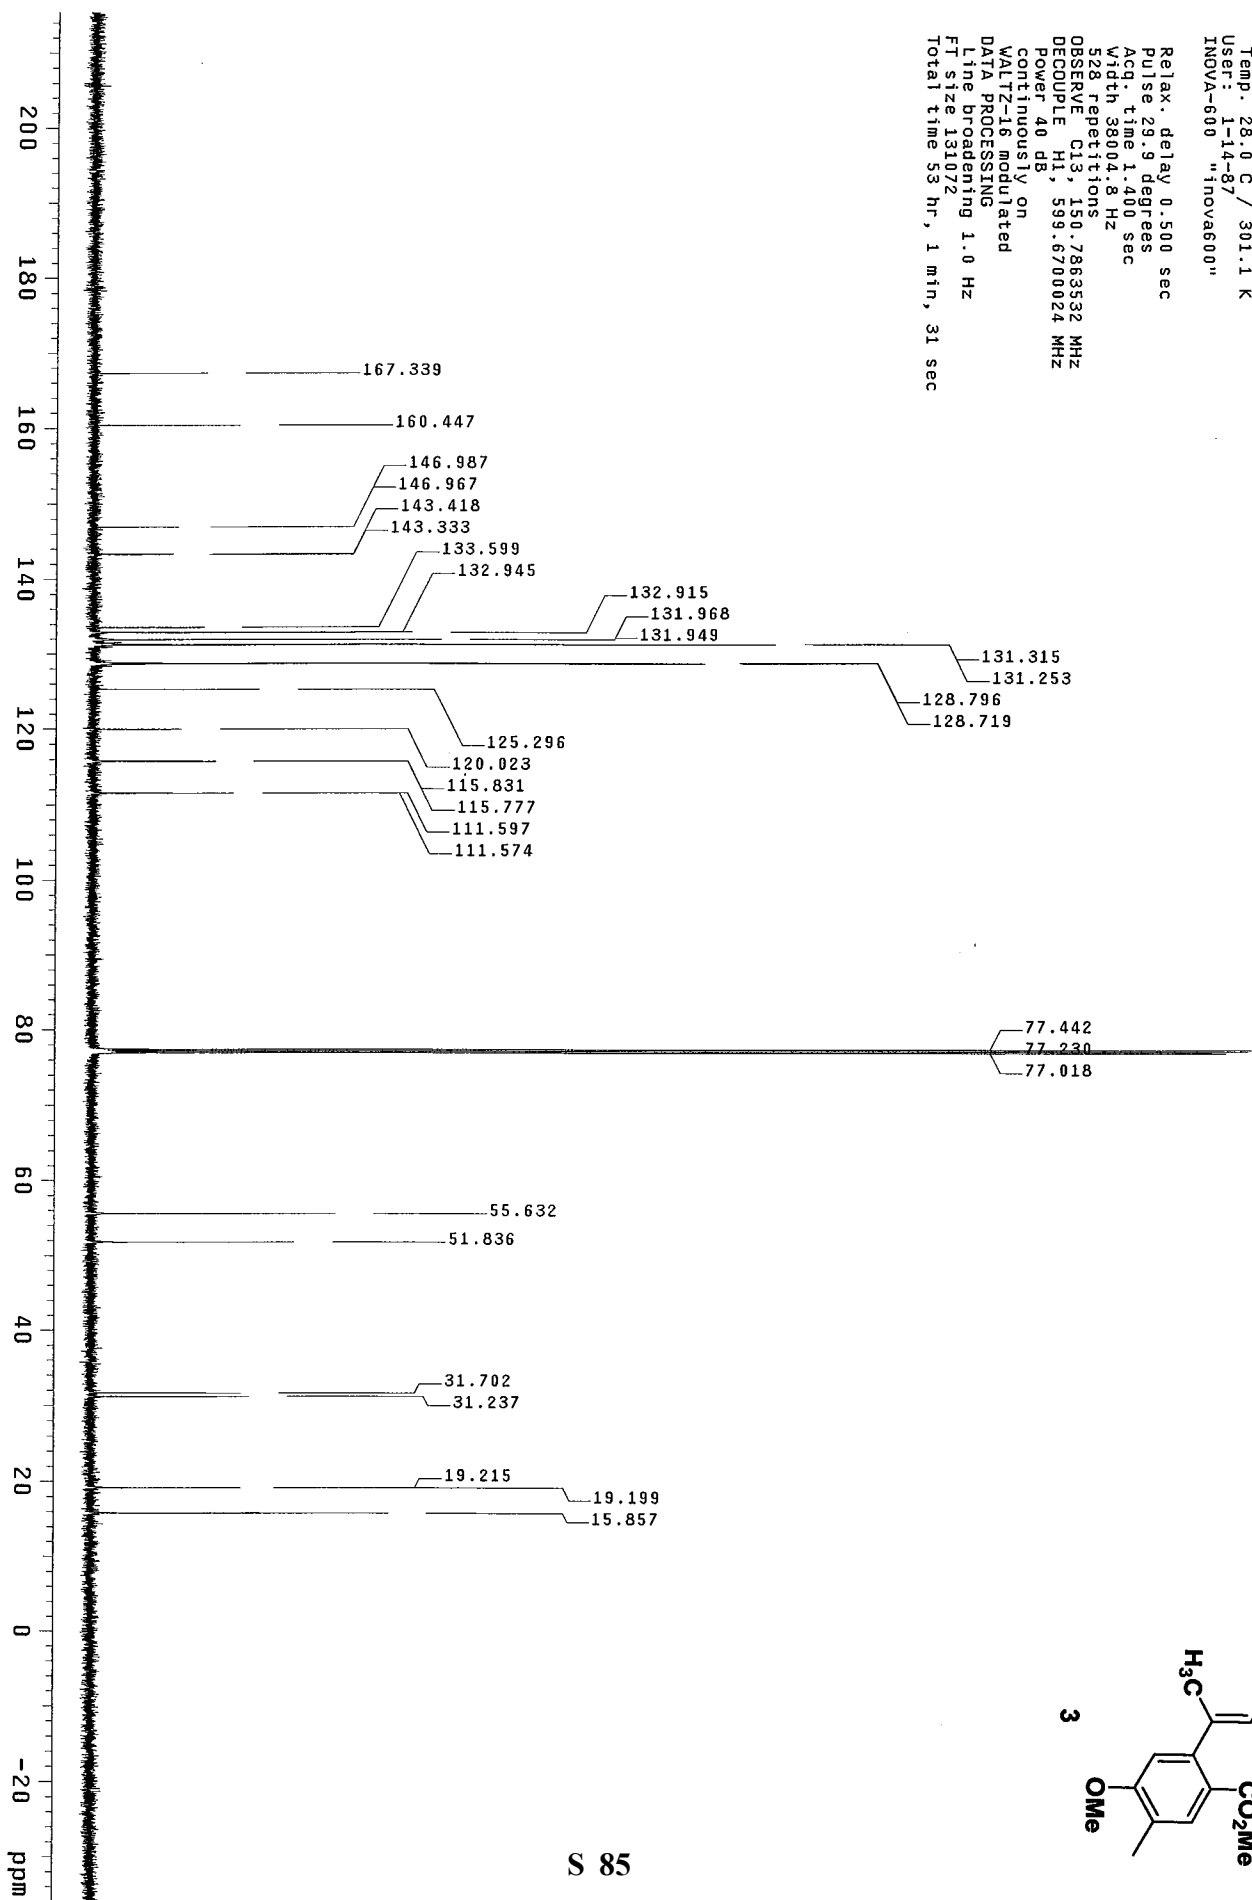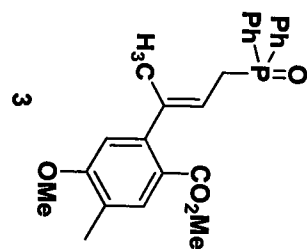

STANDARD PROTON PARAMETERS

Archive directory: /export/home/vnmr1/vnmrsys/data  
Sample directory:  
File: PROTON

Pulse Sequence: s2pu1

Solvent: CDCl3  
Temp: 28.0 C / 301.1 K  
INNOVA-600 "Inova600"

Relax. delay 1.000 sec  
Pulse 30.0 degrees  
Acq. time 4.000 sec  
Width 9594.6 Hz  
16 repetitions  
OBSERVE H1, 599.6670085 MHz  
DATA PROCESSING  
Line broadening 0.2 Hz  
FT size 131072  
Total time 1 min, 20 sec

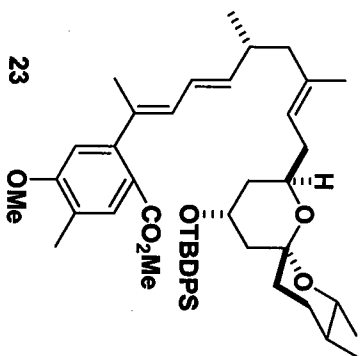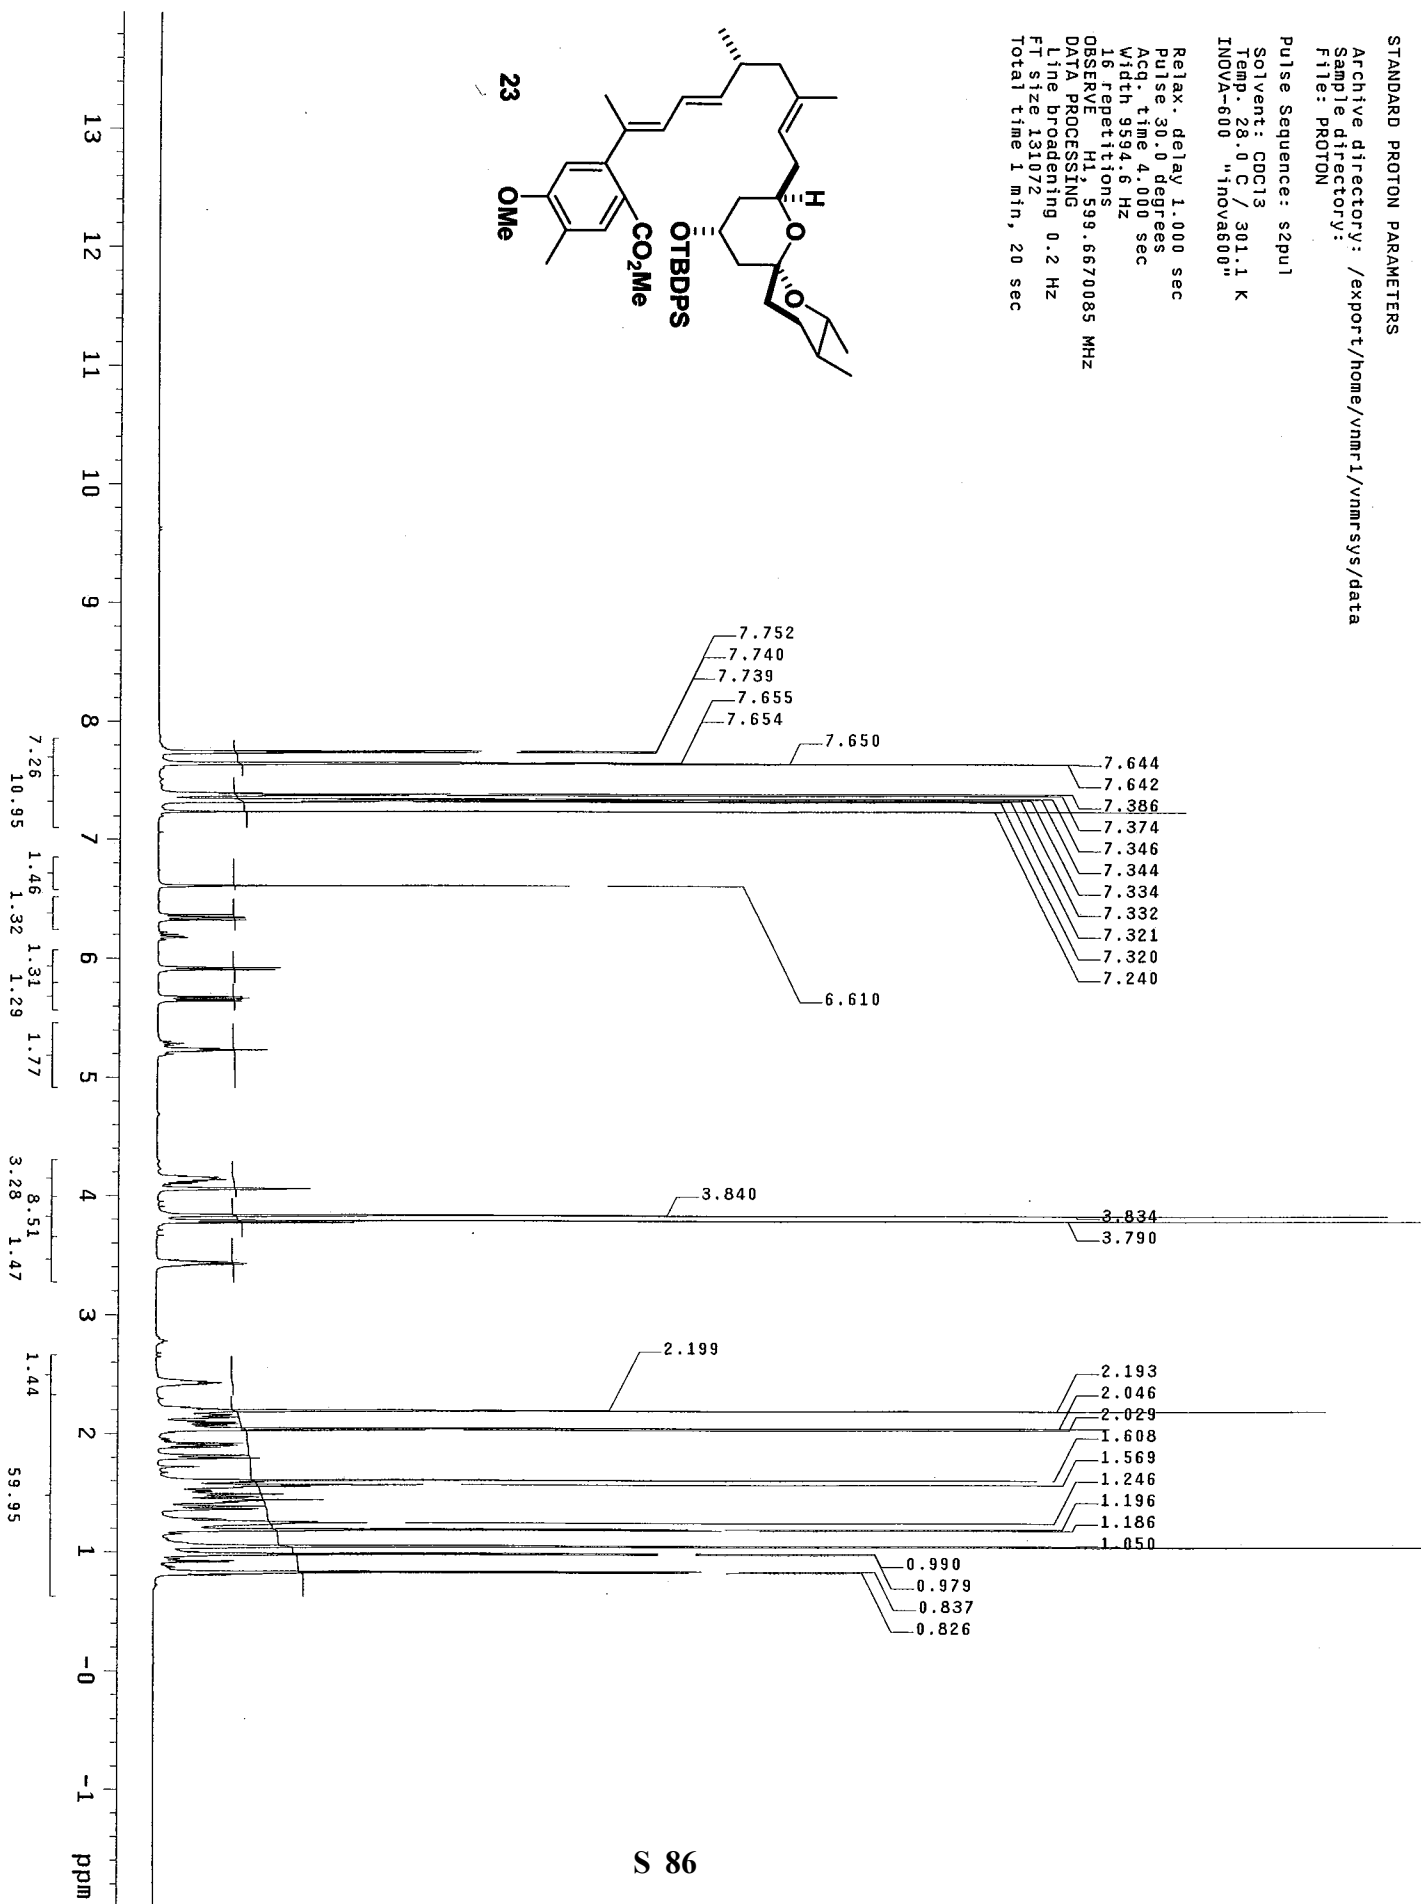

# STANDARD CARBON PARAMETERS

Pulse Sequence: s2pu1

Solvent: CDCl<sub>3</sub>

Temp: 28.0 C / 301.1 K

User: 1-14-87

INNOVA-600 "innova600"

Relax. delay 0.500 sec

Pulse 29.9 degrees

Acq. time 1.400 sec

Width 38004.8 Hz

1072 repetitions

OBSERVE C13, 150.7863521 MHz

DECOUPLE H1, 599.6700024 MHz

Power 40 dB

continuously on

WALTZ-16 modulated

DATA PROCESSING

Line broadening 1.0 Hz

F1 size 131072

Total time 530 hr, 15 min, 13 sec

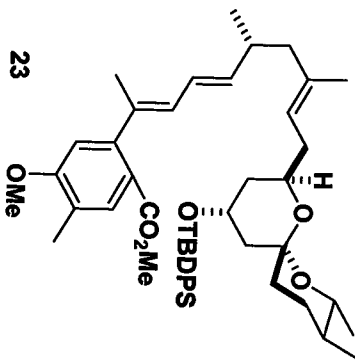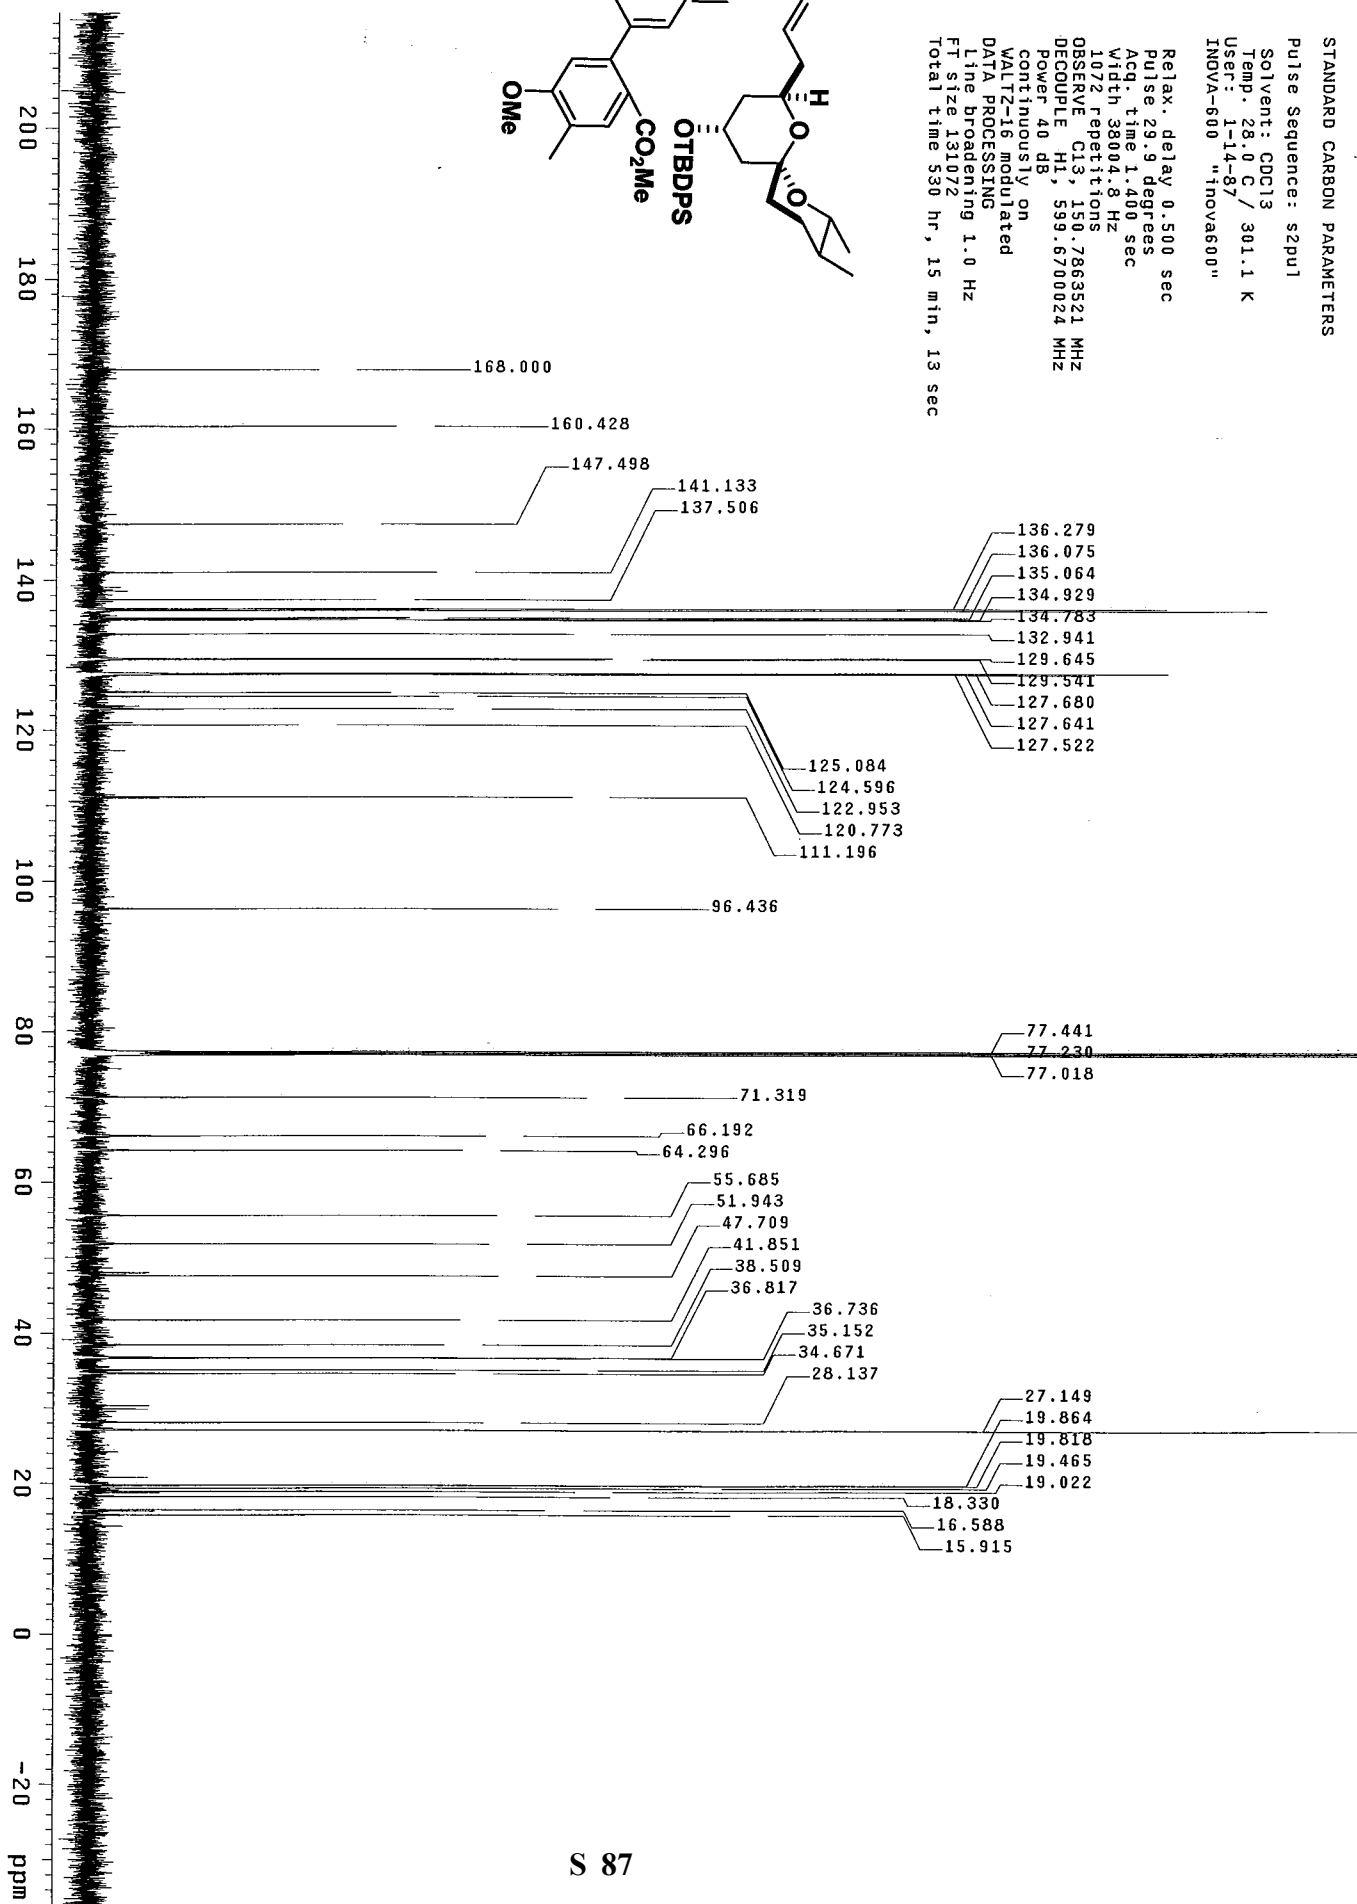

STANDARD PROTON PARAMETERS

Archive directory: /export/home/vnmr1/vnmrsys/data  
Sample directory:  
File: PROTON

Pulse Sequence: s2pu1

Solvent: CDCl3  
Temp: 28.0 C / 301.1 K  
INDVA-600 "Inova600"

Relax. delay 1.000 sec  
Pulse 30.0 degrees

Acq. time 4.000 sec  
Width 9594.6 Hz

15 repetitions

OBSERVE H1, 599.6670141 MHz

DATA PROCESSING

line broadening 0.2 Hz

FT size 131072

Total time 1 min, 15 sec

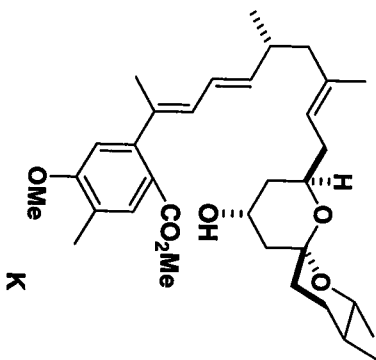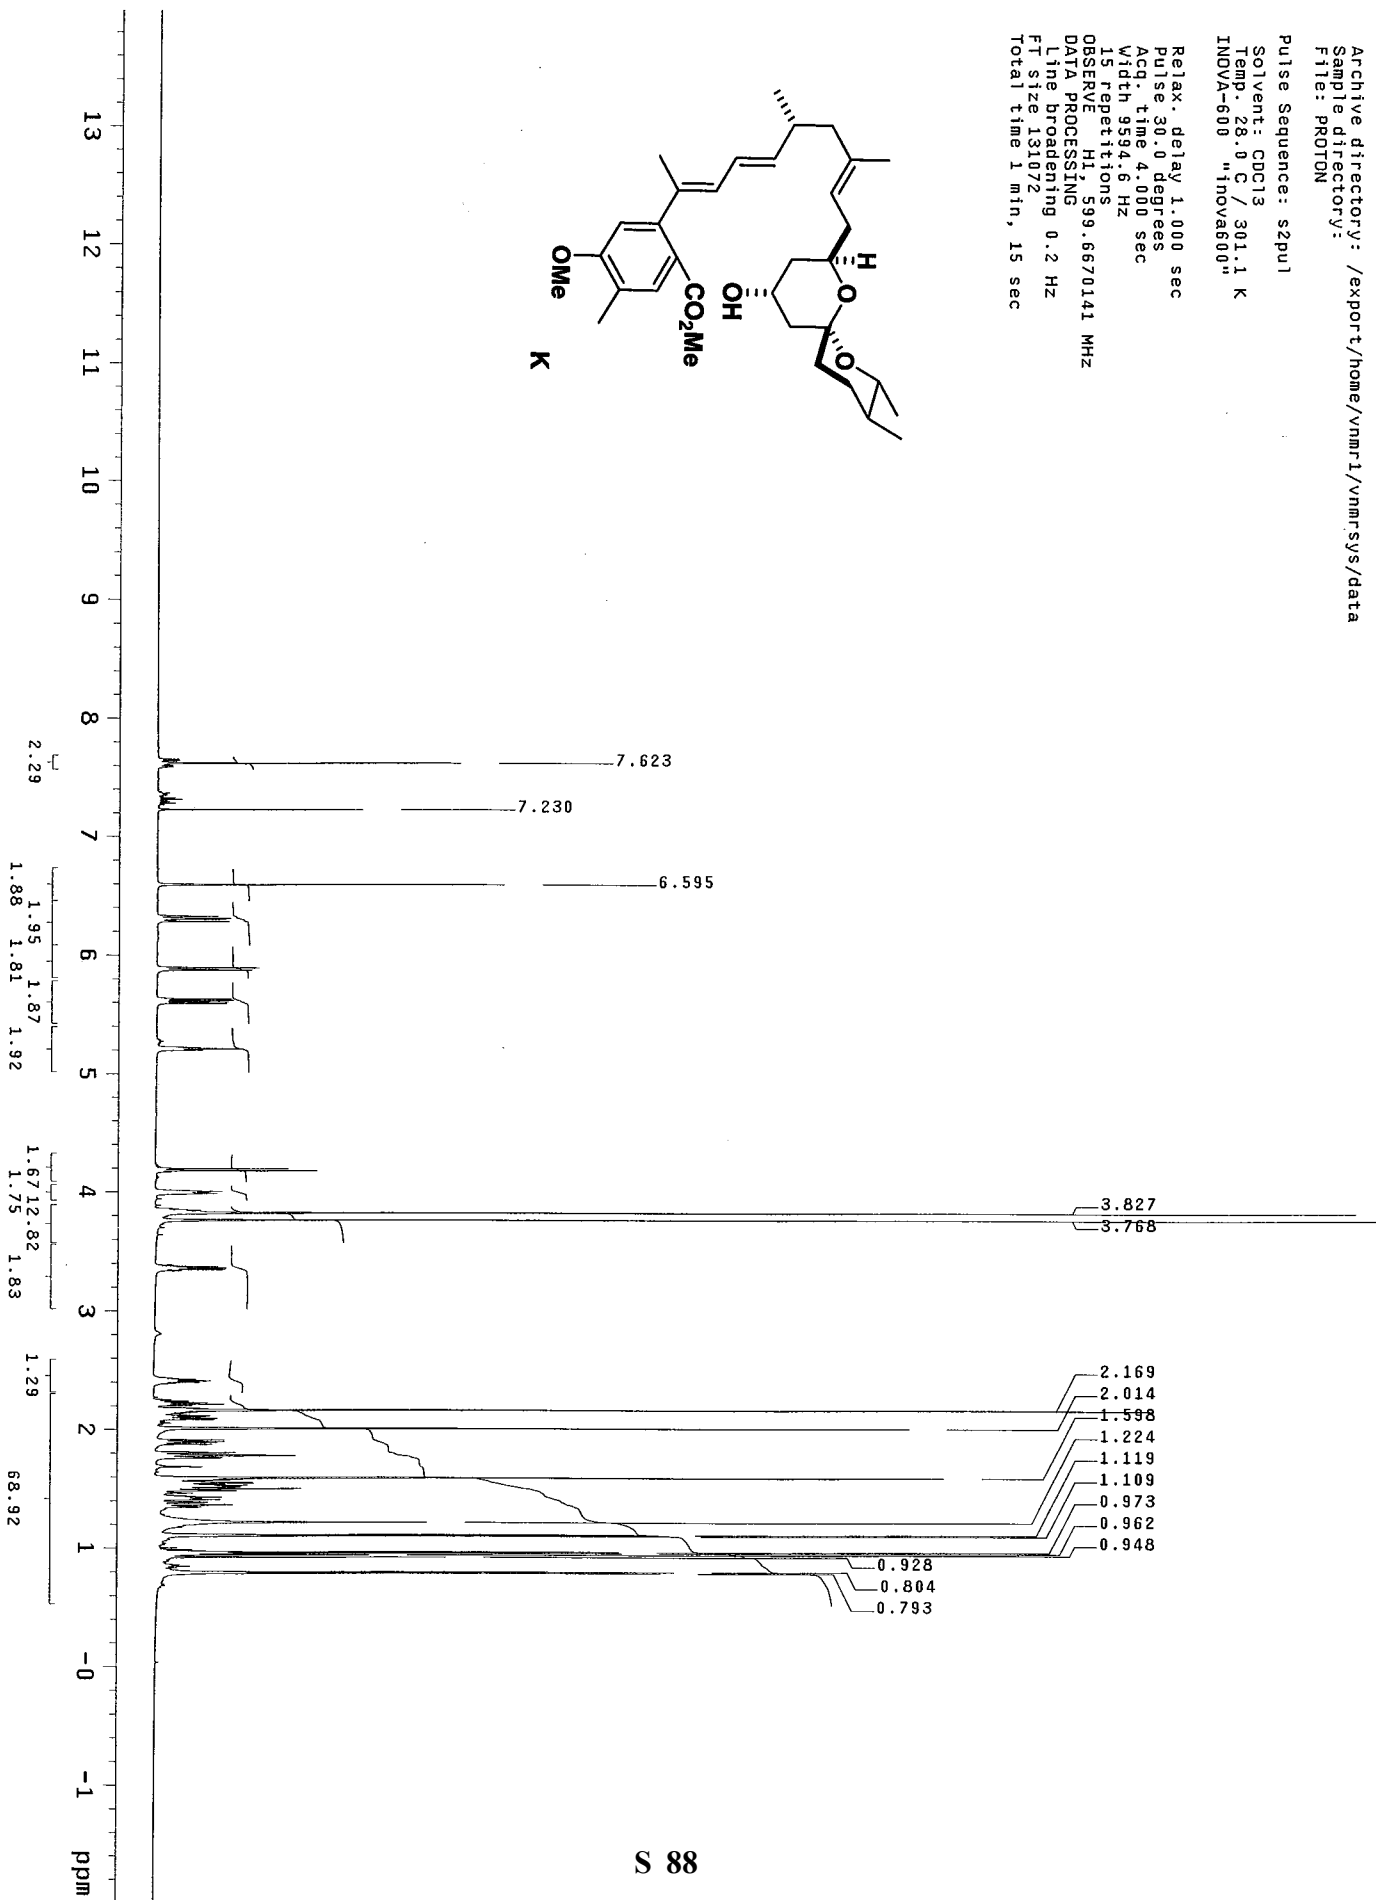

# STANDARD CARBON PARAMETERS

Pulse Sequence: szpu1

Solvent: CDCl3

Temp. 28.0 C / 301.1 K

User: 1-14-87

INOVA-600 "inova600"

Relax. delay 0.500 sec

Pulse 29.9 degrees

Acq. time 1.400 sec

Width 38004.8 Hz

512 repetitions

OBSERVE C13, 150.7863509 MHz

DECOUPLE H1, 599.6700024 MHz

Power 40 dB

continuously on

WALTZ-16 modulated

DATA PROCESSING

Line broadening 1.0 Hz

FT size 131072

Total time 5 hr, 18 min, 9 sec

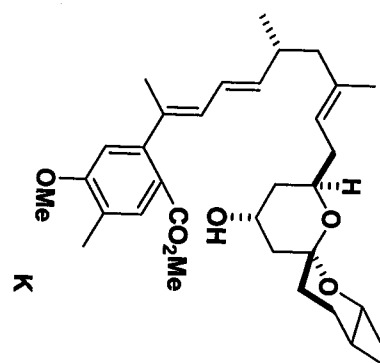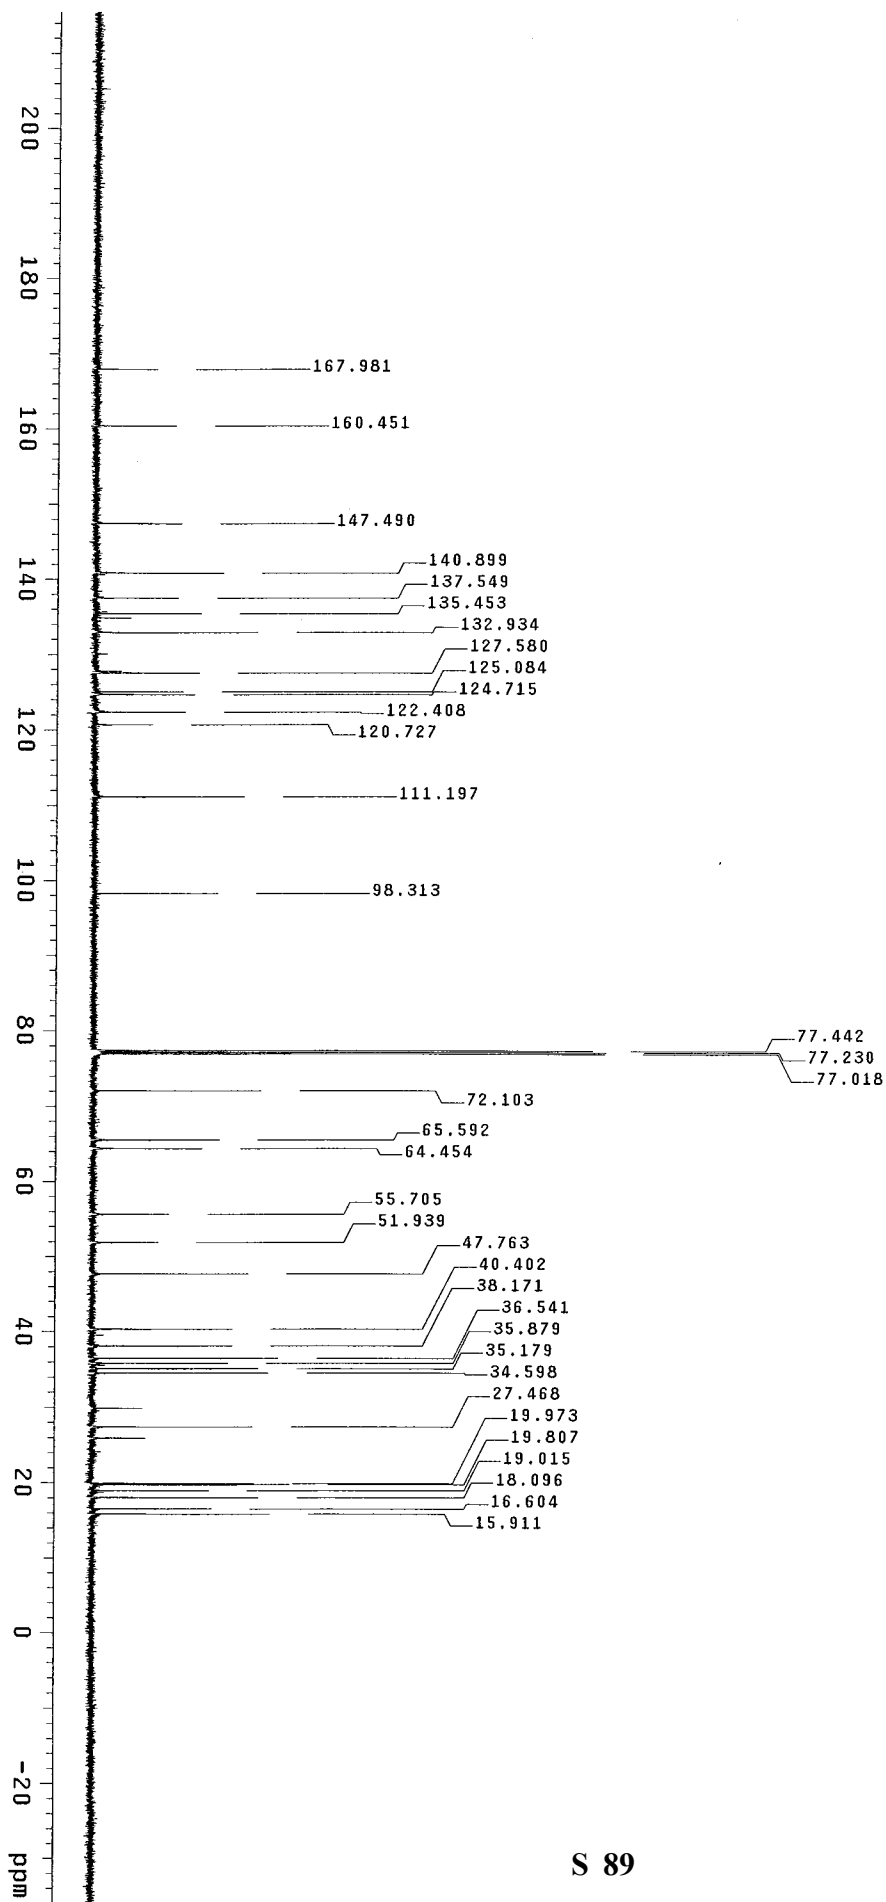

# STANDARD PROTON PARAMETERS

Archive directory: /export/home/vnmr1/vnmrsys/data  
Sample directory:  
File: PROTON

Pulse Sequence: s2pu1

Solvent: CDCl3  
Temp: 28.0 C / 301.1 K  
INNOVA-600 "Innova600"

Relax. delay 1.000 sec  
Pulse 30.0 degrees

Acq. time 4.000 sec  
Width 9594.6 Hz

2 repetitions

OBSERVE H1, 599.6670039 MHz

DATA PROCESSING

Line broadening 0.2 Hz

FT size 131072

Total time 0 min, 10 sec

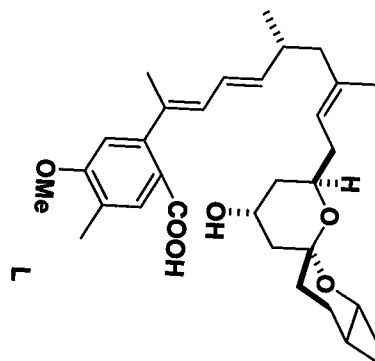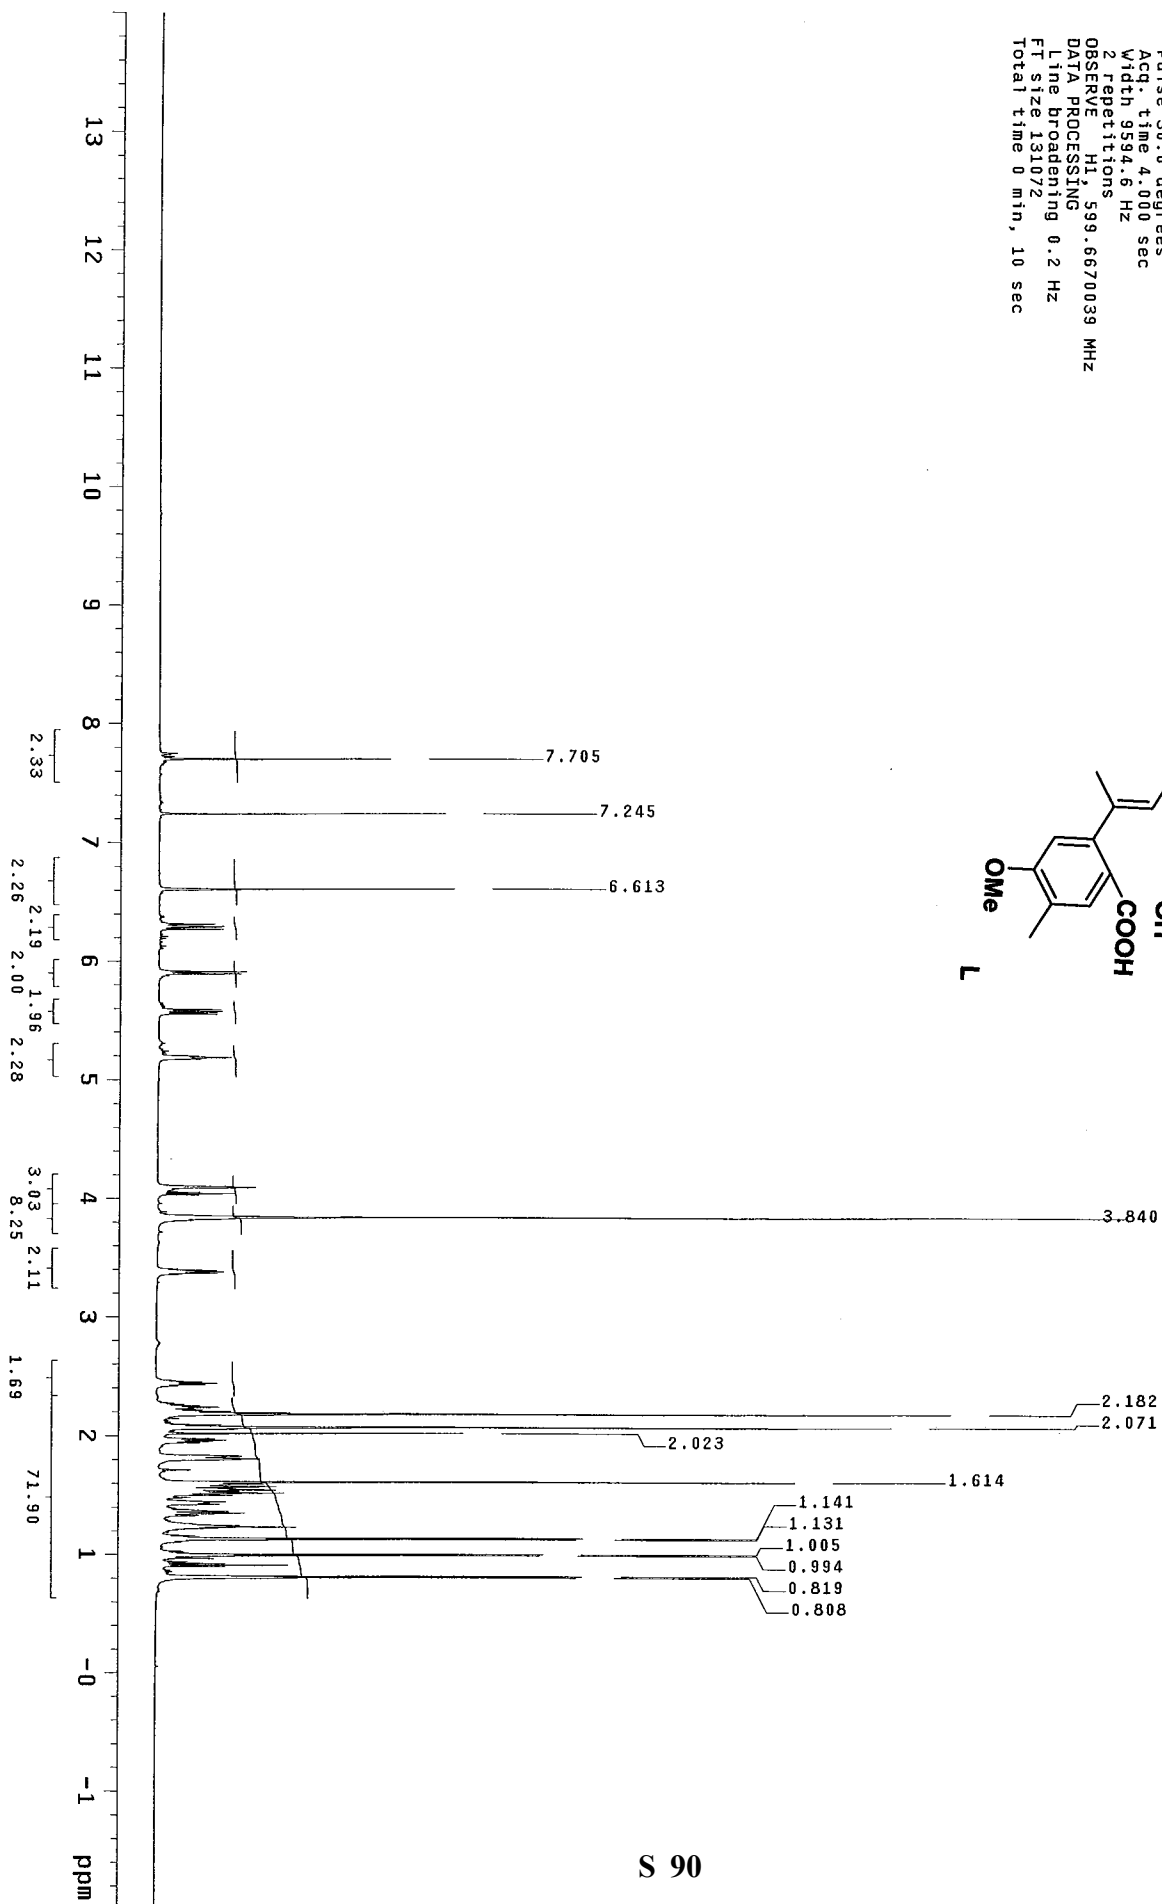

# STANDARD CARBON PARAMETERS

Pulse Sequence: szpul

Solvent: CDCl<sub>3</sub>

Temp: 28.0 C / 301.1 K

User: 1-14-87

INNOVA-600 "Innova600"

Relax. delay 1.000 sec

Pulse 29.9 degrees

Acq. time 1.300 sec

Width 38004.8 Hz

528 repetitions

OBSERVE C13, 150.7863873 MHz

DECOUPLE H1, 599.6700024 MHz

Power 40 dB

continuously on

WALTZ-16 modulated

DATA PROCESSING

Line broadening 1.0 Hz

FT size 131072

Total time 39 min, 24 sec

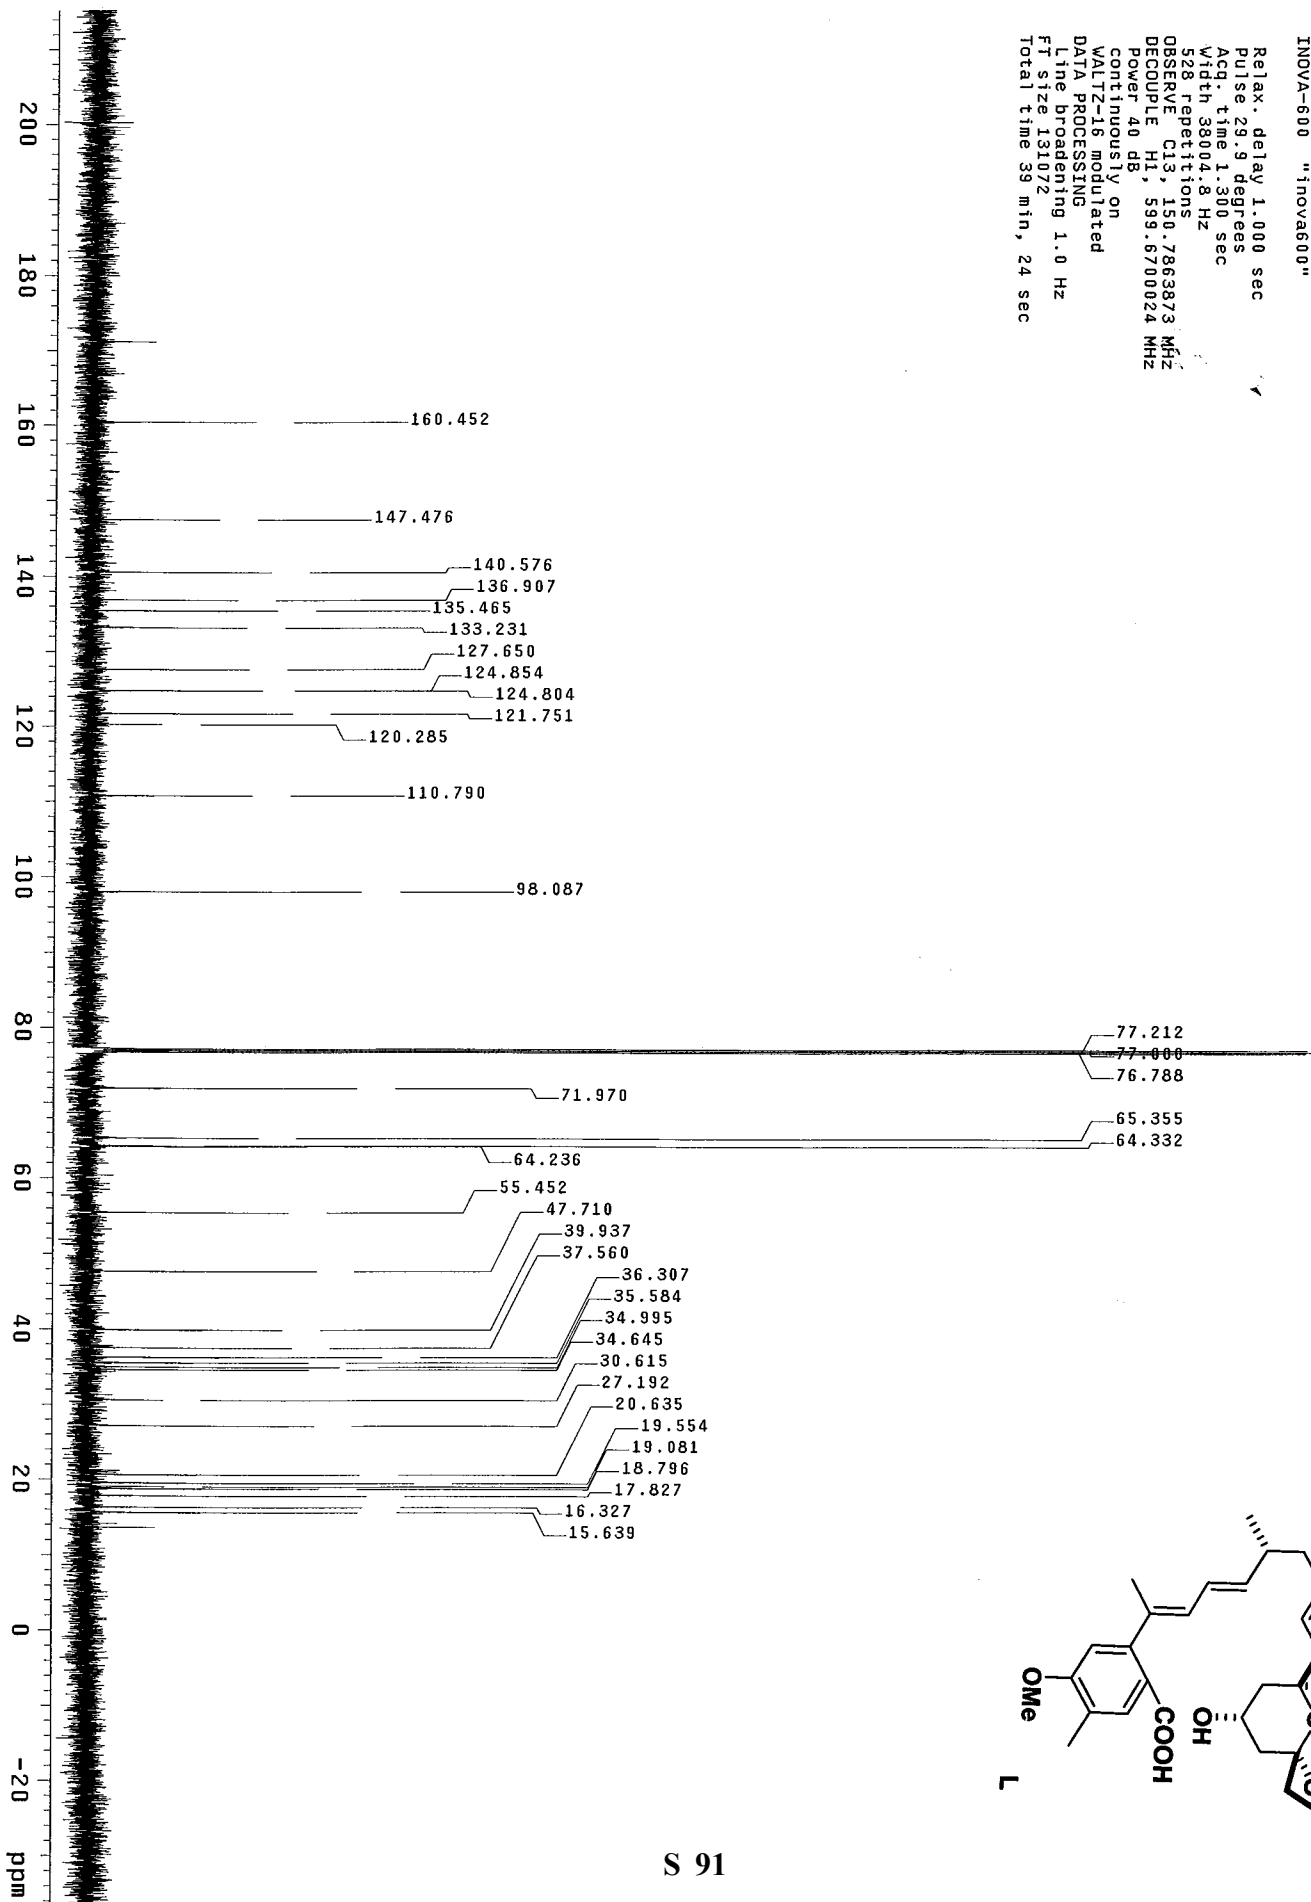

# STANDARD PROTON PARAMETERS

Archive directory: /export/home/vnmr1/vnmrSYS/data  
 Sample directory:  
 File: PROTON

Pulse Sequence: s2pu1

Solvent: CDCl3  
 Temp: 28.0 C / 301.1 K  
 INOVA-600 "inova600"

Relax. delay 1.000 sec  
 Pulse 30.0 degrees  
 Acq. time 4.000 sec  
 Width 3594.6 Hz  
 10 repetitions  
 OBSERVE H1, 599.6670068 MHz  
 DATA PROCESSING  
 Line broadening 0.2 Hz  
 FI size 131072  
 Total time 0 min, 50 sec

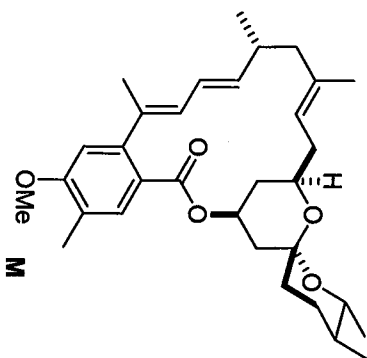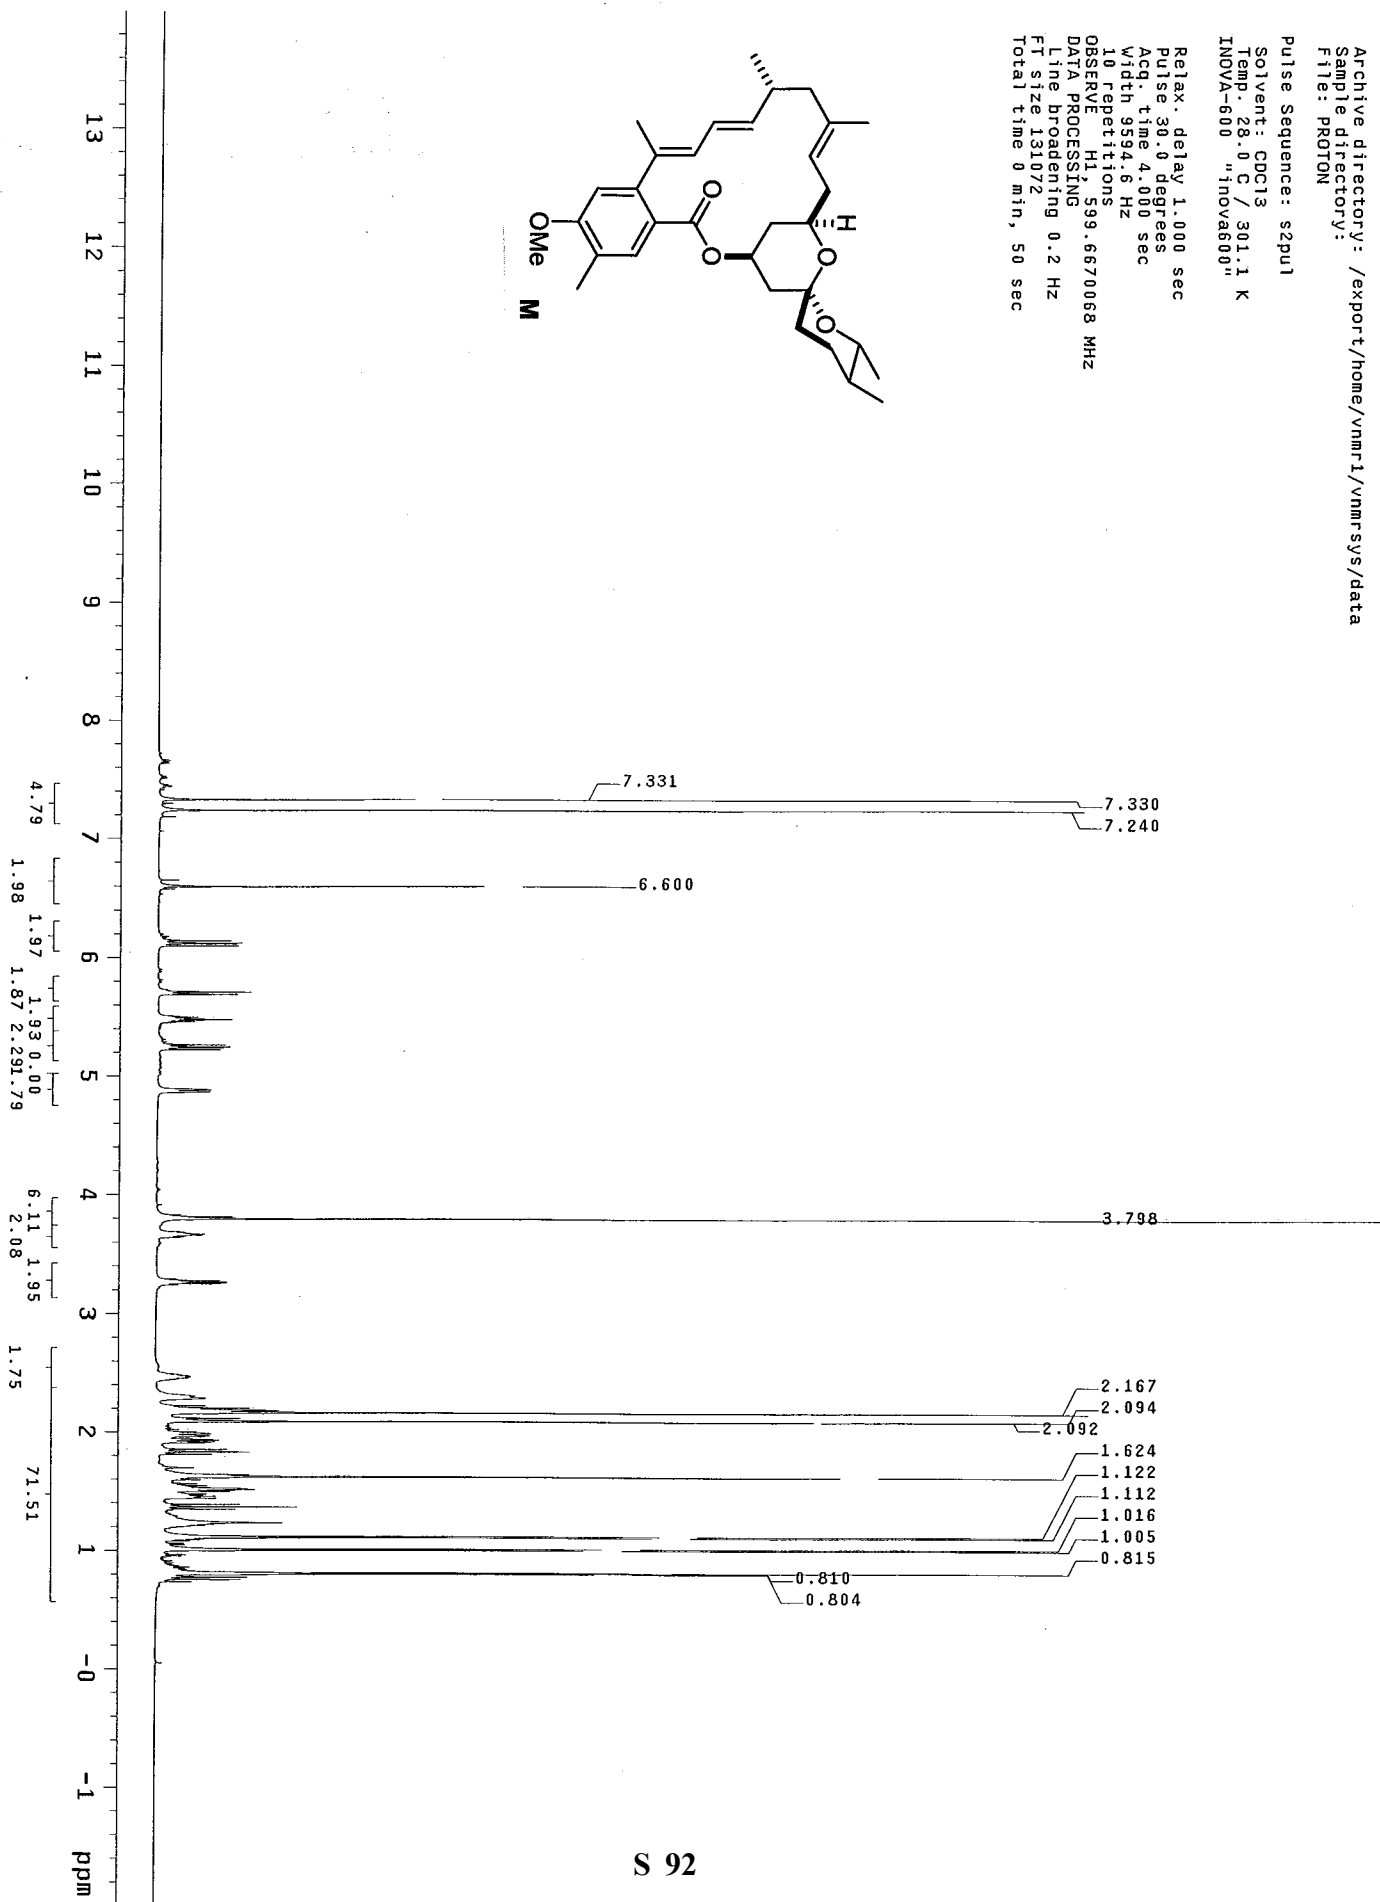

STANDARD CARBON PARAMETERS

Pulse Sequence: s2pu1

Solvent: CDCl<sub>3</sub>

Temp: 28.0 C / 301.1 K

User: 1-14-87

INOVA-600 "inova600"

Relax. delay 1.000 sec

Pulse 29.9 degrees

Acq. time 1.300 sec

Width 38004.8 Hz

15192 repetitions

OBSERVE C13, 150.766385 MHz

DECOUPLE H1, 599.670024 MHz

Power 40 dB

continuously on

WALTZ-16 modulated

DATA PROCESSING

Line broadening 1.0 Hz

FT size 131072

Total time 641 hr, 29 min, 33 sec

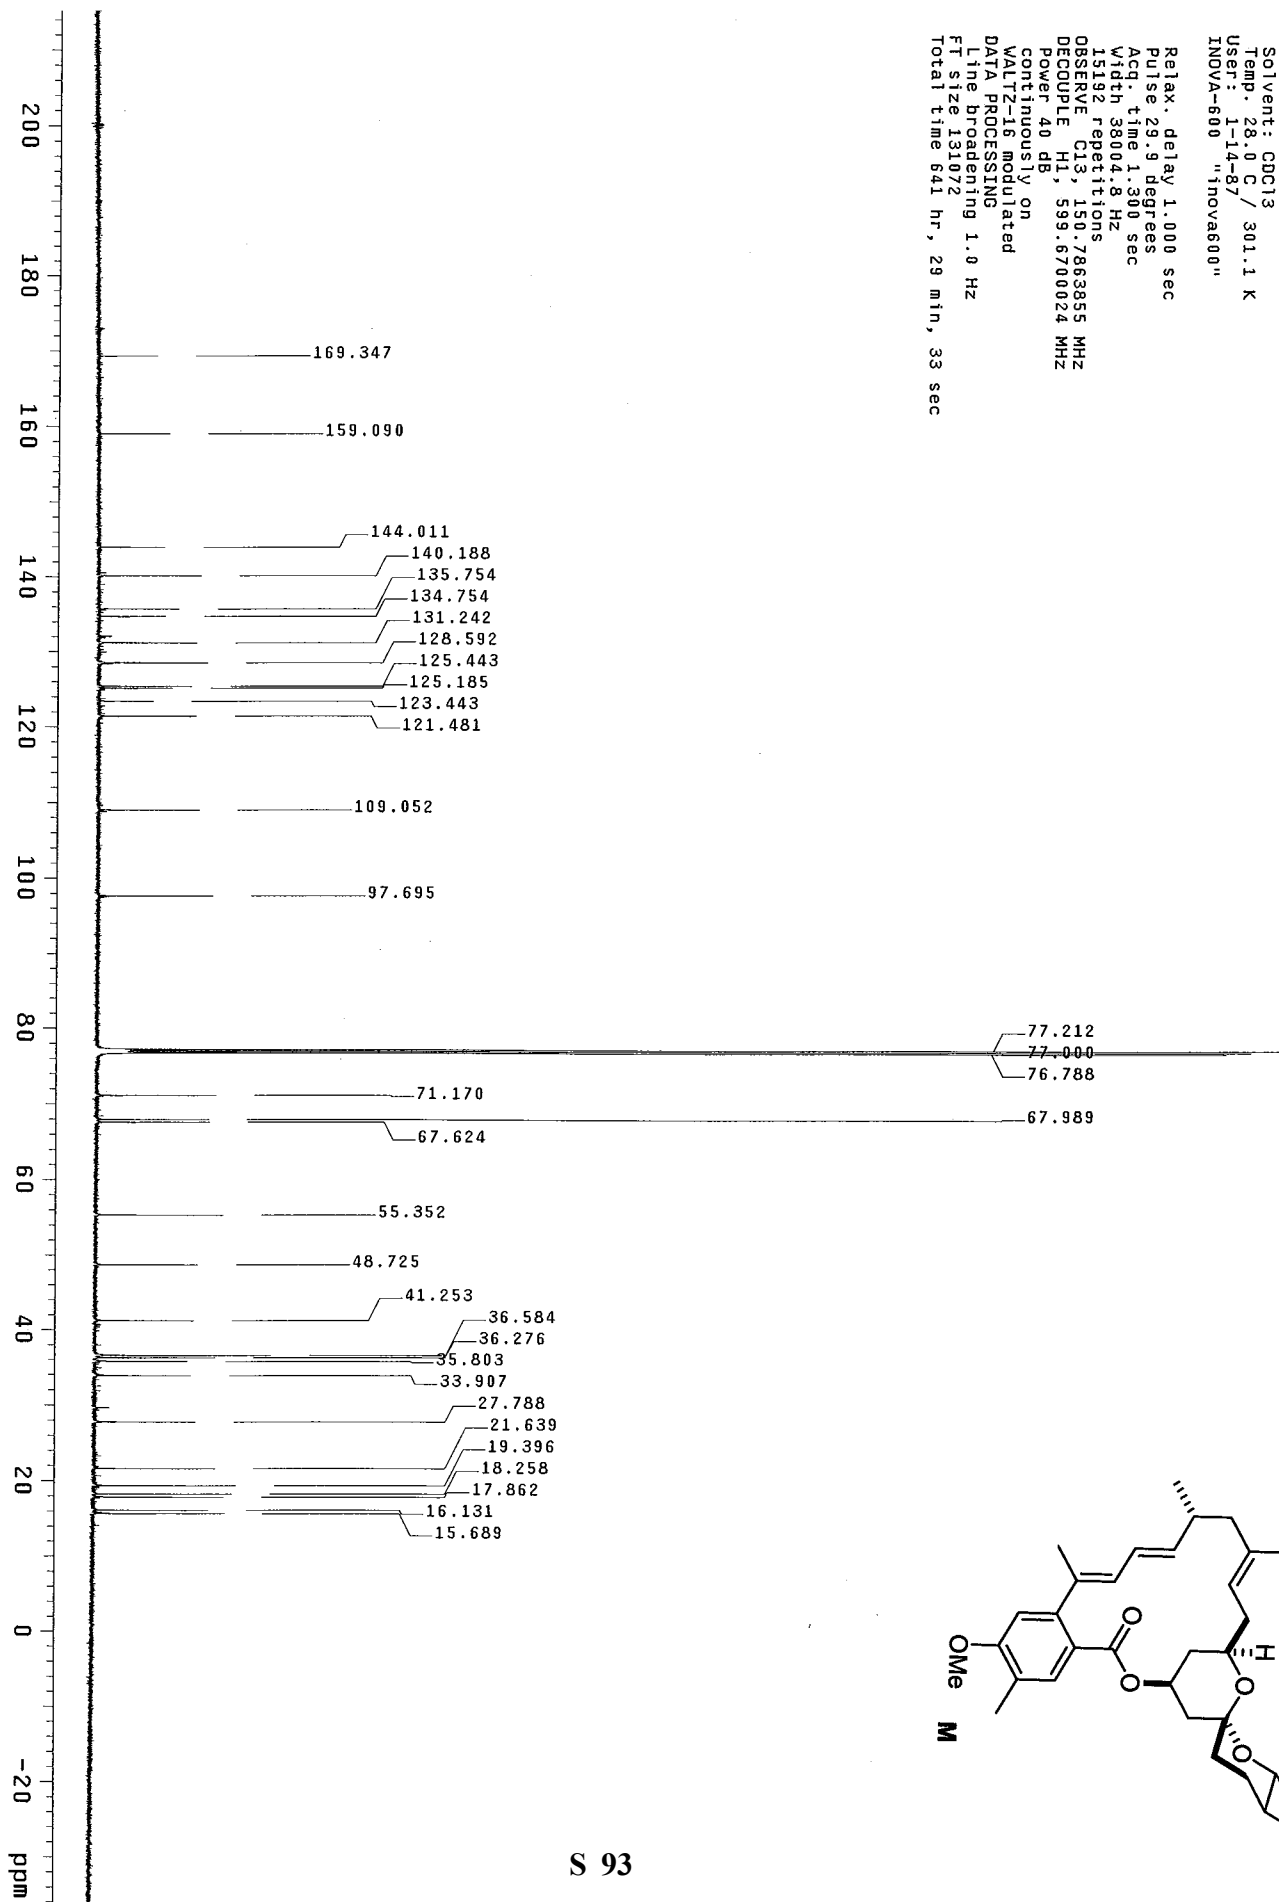

STANDARD PROTON PARAMETERS

Archive directory: /export/home/vnmr1/vnmrsys/data  
 Sample directory:  
 File: PROTON

Pulse Sequence: s2pu1

Solvent: CDCl3  
 Temp: 28.0 C / 301.1 K  
 INOVA-600 "Inova600"

Relax. delay 1.000 sec  
 Pulse 30.0 degrees

Acq. time 4.000 sec  
 Width 9594.6 Hz

30 repetitions

OBSERVE H1, 599.6670039 MHz

DATA PROCESSING

line broadening 0.2 Hz

FT size 131072

Total time 2 min, 30 sec

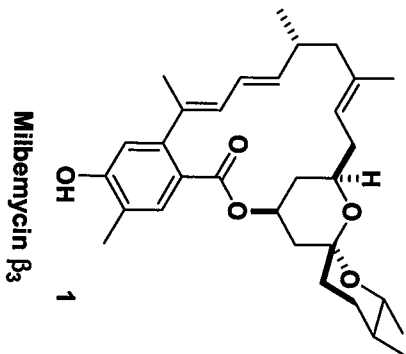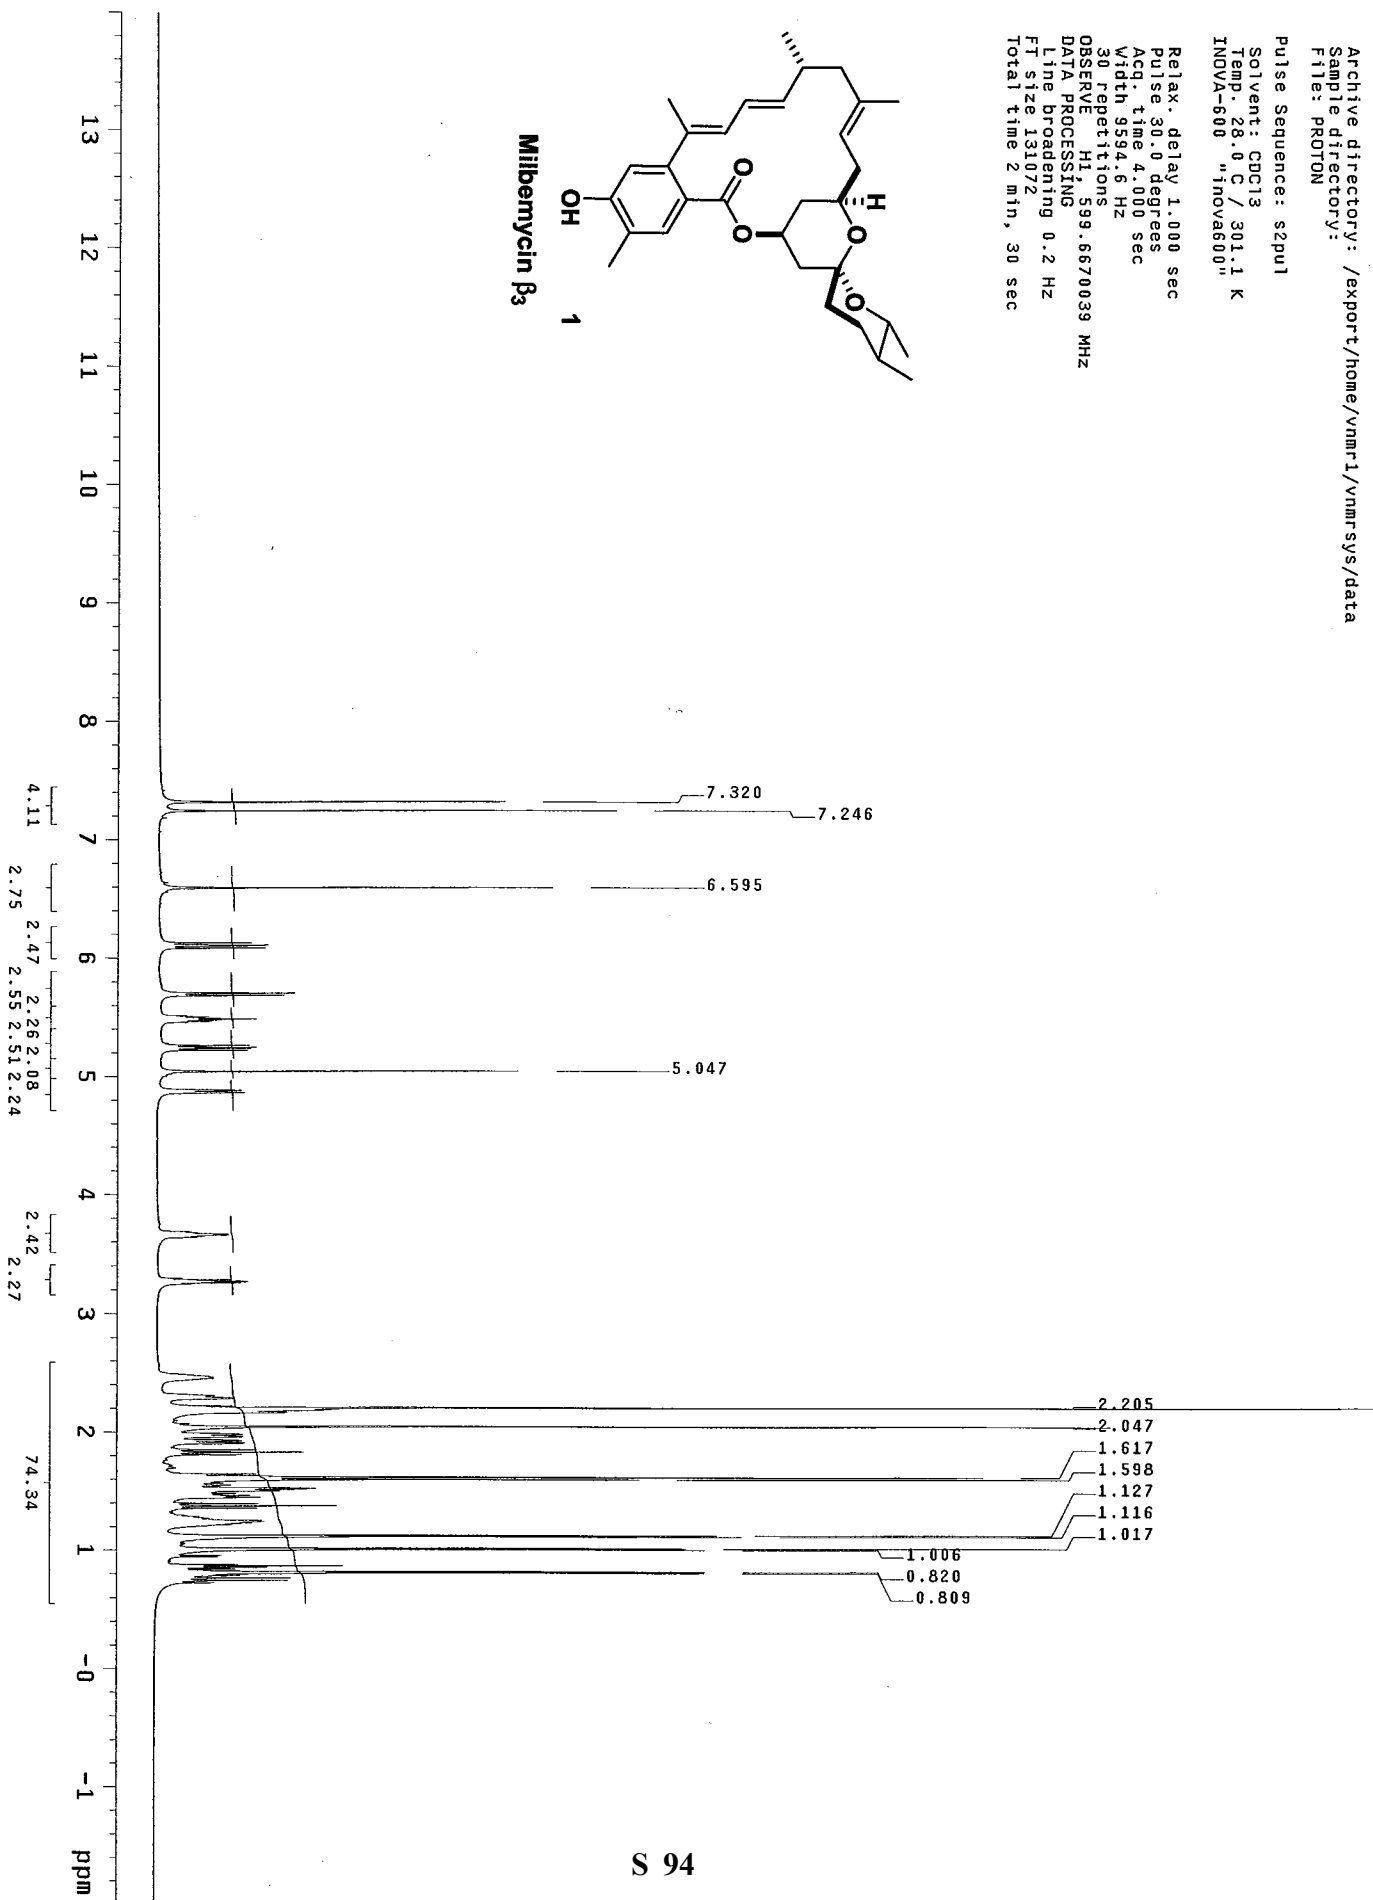

STANDARD CARBON PARAMETERS

Pulse Sequence: s2pul

Solvent: CDCl<sub>3</sub>

Temp: 28.0 C / 301.1 K

User: 1-14-87

INDVA-600 "Inova600"

Relax. delay 1.000 sec

Pulse 29.9 degrees

Acq. time 1.300 sec

Width 38004.8 Hz

100000 repetitions

OBSERVE C13, 150.763838 MHz

DECOUPLE H1, 599.670024 MHz

Power 40 dB

continuously on

WALTZ-16 modulated

DATA PROCESSING

Line broadening 1.0 Hz

FT size 131072

Total time 64 hr, 8 min, 57 sec

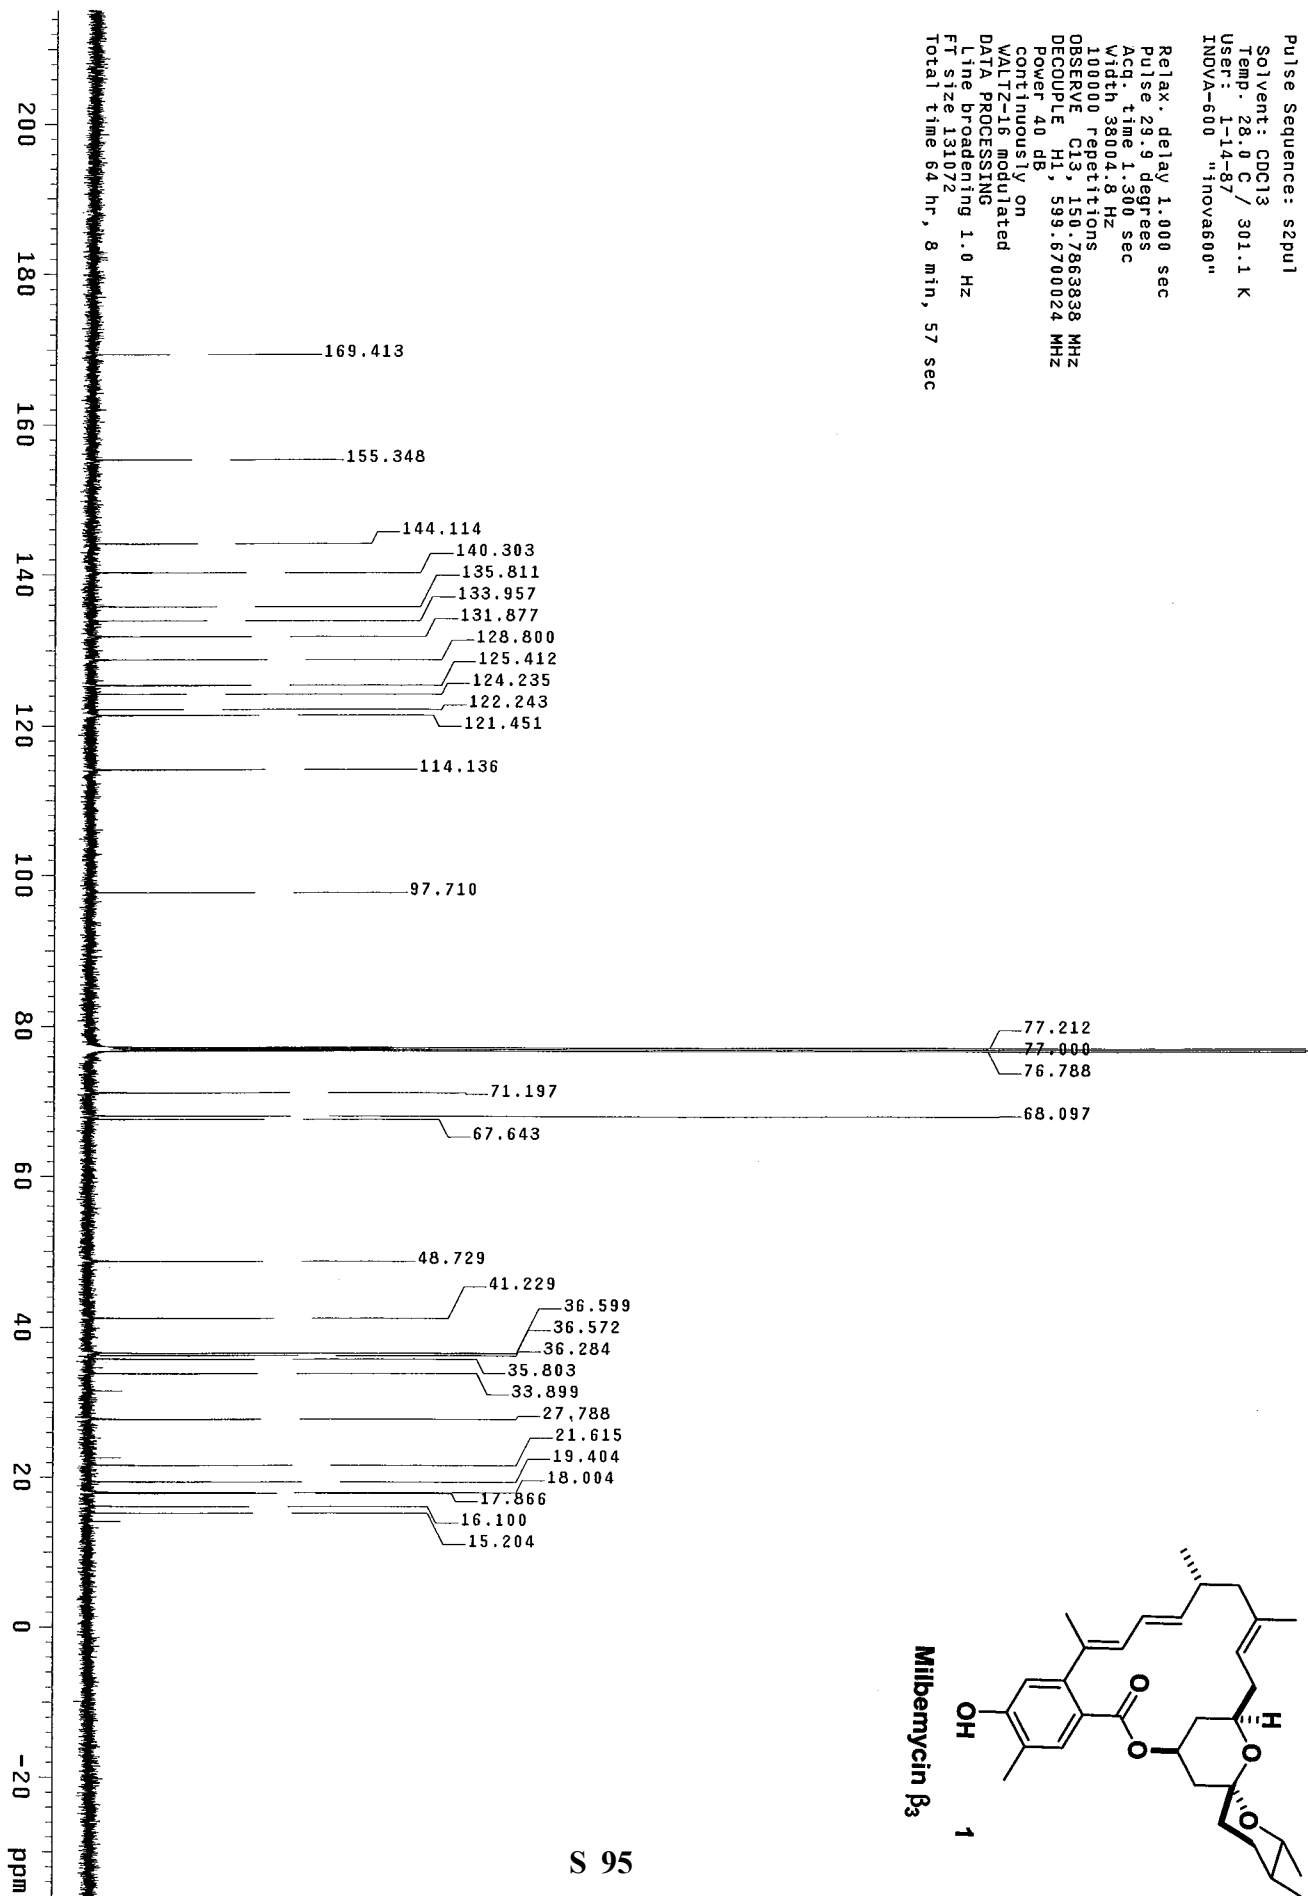

Milbemycin B<sub>3</sub>

1

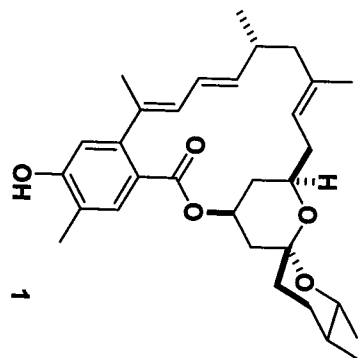

Supplement: NIHMS61229-supplement-si20060612_034.pdf [file NIHMS61229-supplement-si20060612_034.pdf]
